# Supplementary material for: Construction of the quinobenzoxazine coreviagold-catalyzed dual annulation of azide-tethered alkynones with anthranils
Source: Royal Society of Chemistry journal article supplement (doi:10.1039/d3ob00098b), 2023-01-01
Supplement: d3ob00098b1.pdf [file d3ob00098b1.pdf]

## Electronic Supplementary Information

### **Construction of the Quinobenzoxazine Core *via* Gold-Catalyzed Dual Annulation of Azide-Tethered Alkynones with Anthranil**

Swapnil V. Halnor,<sup>a,b</sup> Pawan S. Dhote<sup>a</sup> and Chepuri V. Ramana\*<sup>a,b</sup>

<sup>a</sup>Division of Organic Chemistry, CSIR-National Chemical Laboratory, Dr. Homi Bhabha Road, Pune 411 008, India.

<sup>b</sup>Academy of Scientific and Innovative Research (AcSIR), Ghaziabad-201002, India.

\*E-mail: [vr.chepuri@ncl.res.in](mailto:vr.chepuri@ncl.res.in)

#### Contents

|                                                                                             |    |
|---------------------------------------------------------------------------------------------|----|
| 1. General information                                                                      | S2 |
| 2. Crystallographic Data of Compound 7                                                      | S2 |
| 3. References                                                                               | S4 |
| 4. <sup>1</sup> H NMR, <sup>13</sup> C NMR, DEPT NMR, and HRMS spectra of all new compounds | S5 |

## General information:

The reactions were carried out in anhydrous solvents under argon atmosphere in oven-dried glassware. All anhydrous solvents were distilled prior to use. Commercial reagents were used without any purification. Column chromatography was carried out by using silica gel (60–120, 100–200, 230–400 mesh).  $^1\text{H}$  and  $^{13}\text{C}$  NMR chemical shifts are reported relative to chloroform-d ( $\delta = 7.27$ ) or TMS, and coupling constants ( $J$ ) are reported in hertz (Hz). The following abbreviations have been used to designate signal multiplicity: s = singlet, d = doublet, t = triplet, q = quartet, quin = quintet, sxt = sextet, sept = septet, m = multiplet, b = broad. High-resolution mass spectra (HRMS) were recorded on a Q Exactive Hybrid Quadrupole Orbitrap mass spectrometer, where the mass analyzer used for analysis is orbitrap & some compounds on electrospray ionization time-of-flight (ESI-TOF). Infra-red (IR) spectra were measured in  $\text{cm}^{-1}$  using FT-IR spectrophotometer. All *o*-azidoacetylenic ketones<sup>1-3</sup> & anthranil<sup>4</sup> substrates were prepared by the known literature procedures.

## Crystallographic data for the structural analysis of compound 7

Good quality single crystals were hand-picked under polarized optical microscopy and then mounted in the diffractometer. The data collection was done at 100-150 K. X-ray intensity data measurements of **7** was carried out on a Bruker SMART APEX II CCD diffractometer with graphite-monochromatized ( $\text{MoK}\alpha = 0.71073 \text{ \AA}$ ) radiation. The X-ray generator was operated at 50 kV and 30 mA. A preliminary set of cell constants and an orientation matrix were calculated from three sets of 36 frames. Data were collected with  $\omega$  scan width of  $0.5^\circ$  at different settings of  $\varphi$  and  $2\theta$  keeping the sample-to-detector distance fixed at 5.00 cm. The X-ray data collection was monitored by APEX2 program (Bruker, 2006).<sup>5</sup> All the data were corrected for Lorentzian, polarization, and absorption effects using SAINT and SADABS programs (Bruker, 2006). SHELX-97 was used for structure solution and full matrix least-squares refinement on  $F^2$ .<sup>6</sup> All the hydrogen atoms were placed in geometrically idealized position and constrained to ride on their parent atoms. An *ORTEP* view of **7** was drawn with 50% probability displacement ellipsoids and H atoms omitted for clarity.<sup>7</sup>

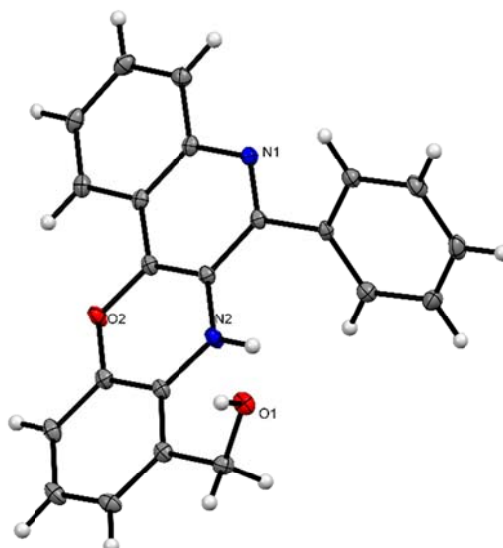

**Figure S1:** ORTEP diagram of Compound 7.  
(Thermal ellipsoids are shown at 50% probability level.)]

| Single Crystal Data of Compound 7                  |                                                               |
|----------------------------------------------------|---------------------------------------------------------------|
| Empirical Formula                                  | C <sub>22</sub> H <sub>16</sub> N <sub>2</sub> O <sub>2</sub> |
| Formula Weight                                     | 340.38                                                        |
| Crystal System                                     | Monoclinic                                                    |
| Space Group                                        | P2 <sub>1</sub> /n                                            |
| T (K)                                              | 100                                                           |
| <i>a</i> (Å)                                       | 9.4049(9)                                                     |
| <i>b</i> (Å)                                       | 13.3896(12)                                                   |
| <i>c</i> (Å)                                       | 12.7634(13)                                                   |
| $\alpha$ (°)                                       | 90                                                            |
| $\beta$ (°)                                        | 91.507(4)                                                     |
| $\gamma$ (°)                                       | 90                                                            |
| <i>V</i> (Å <sup>3</sup> )                         | 1606.7(3)                                                     |
| <i>D</i> <sub>calc</sub> (g cm <sup>-3</sup> )     | 1.407                                                         |
| <i>Z</i>                                           | 4                                                             |
| <i>R</i> <sub>1</sub> ( <i>I</i> > 2σ( <i>I</i> )) | 0.0455                                                        |
| <i>R</i> <sub>int</sub>                            | 0.0430                                                        |
| <i>wR</i> <sub>2</sub> (all)                       | 0.1209                                                        |
| Measured reflections                               | 45851                                                         |
| Independent Reflections                            | 4126                                                          |
| Reflections with <i>I</i> > 2σ( <i>I</i> )         | 3780                                                          |
| Goodness of Fit ( <i>S</i> )                       | 1.057                                                         |
| X-Ray Diffractometer                               | Bruker                                                        |
| CCDC Number                                        | 2193978                                                       |

## References:

1. H. Su, M. Bao, C. Pei, W. Hu, L. Qiu and X. Xu, *Org. Chem. Front.*, 2019, **6**, 2404–2409.
2. X. Wu, L. L. Zheng, L. P. Zhao, C. F. Zhu and Y. G. Li, *Chem. Commun.*, 2019, **55**, 14769–14772.
3. J. Huang, H. Su, M. Bao, L. Qiu, Y. Zhang and X. Xu, *Org. Biomol. Chem.*, 2020, **18**, 3888–3892.
4. J. Chauhan and S. Fletcher, *Tetrahedron Letters*, 2012, **53**, 4951–4954.
5. Bruker (2006). APEX2, SAINT and SADABS. Bruker AXS Inc. Madison, Wisconsin, USA.
6. G. M. Sheldrick, *Acta Cryst.*, 2008, **A64**, 112–122.
7. L. J. Farrugia, *J. Appl. Cryst.*, 1997, **30**, 565.

# 3aa

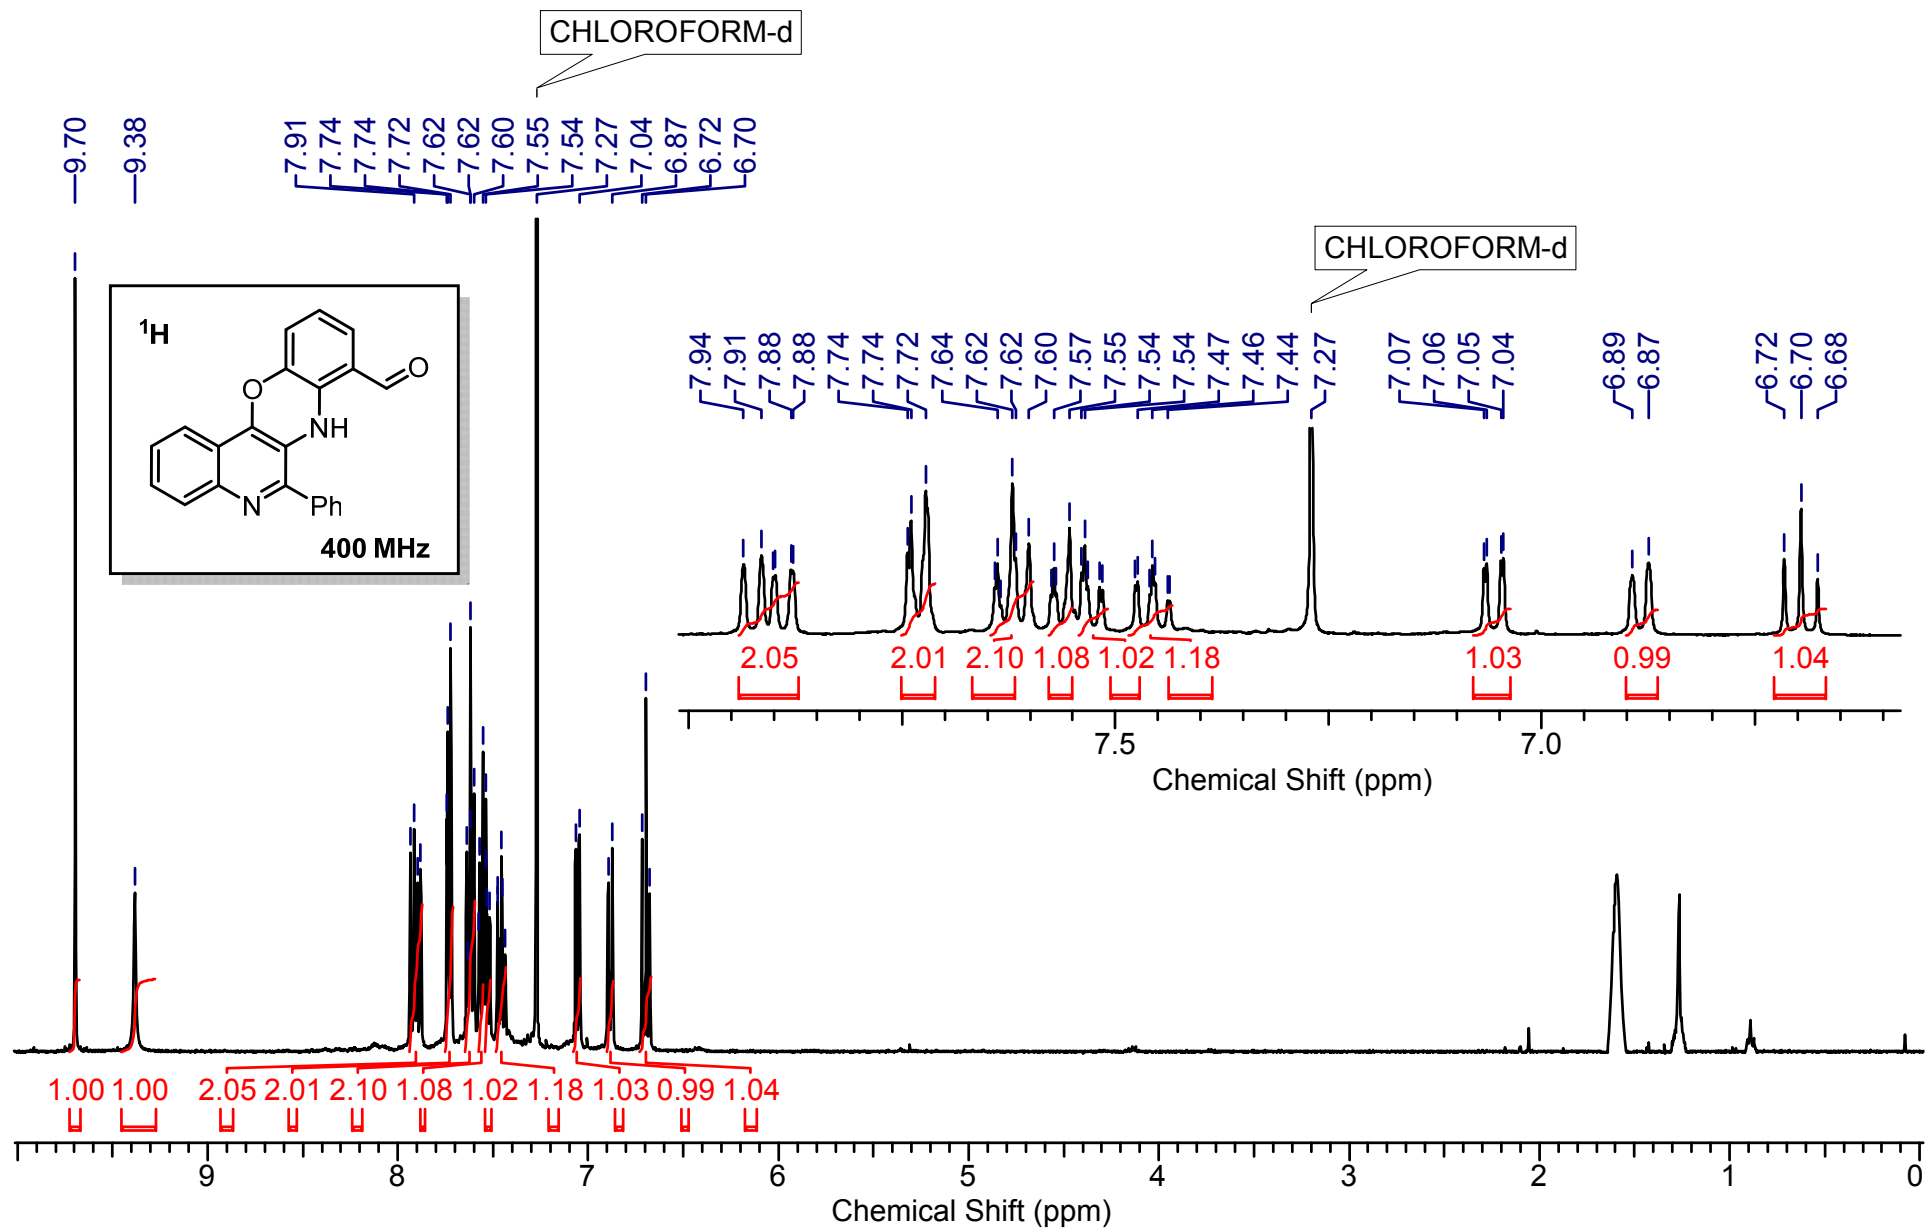

# 3aa

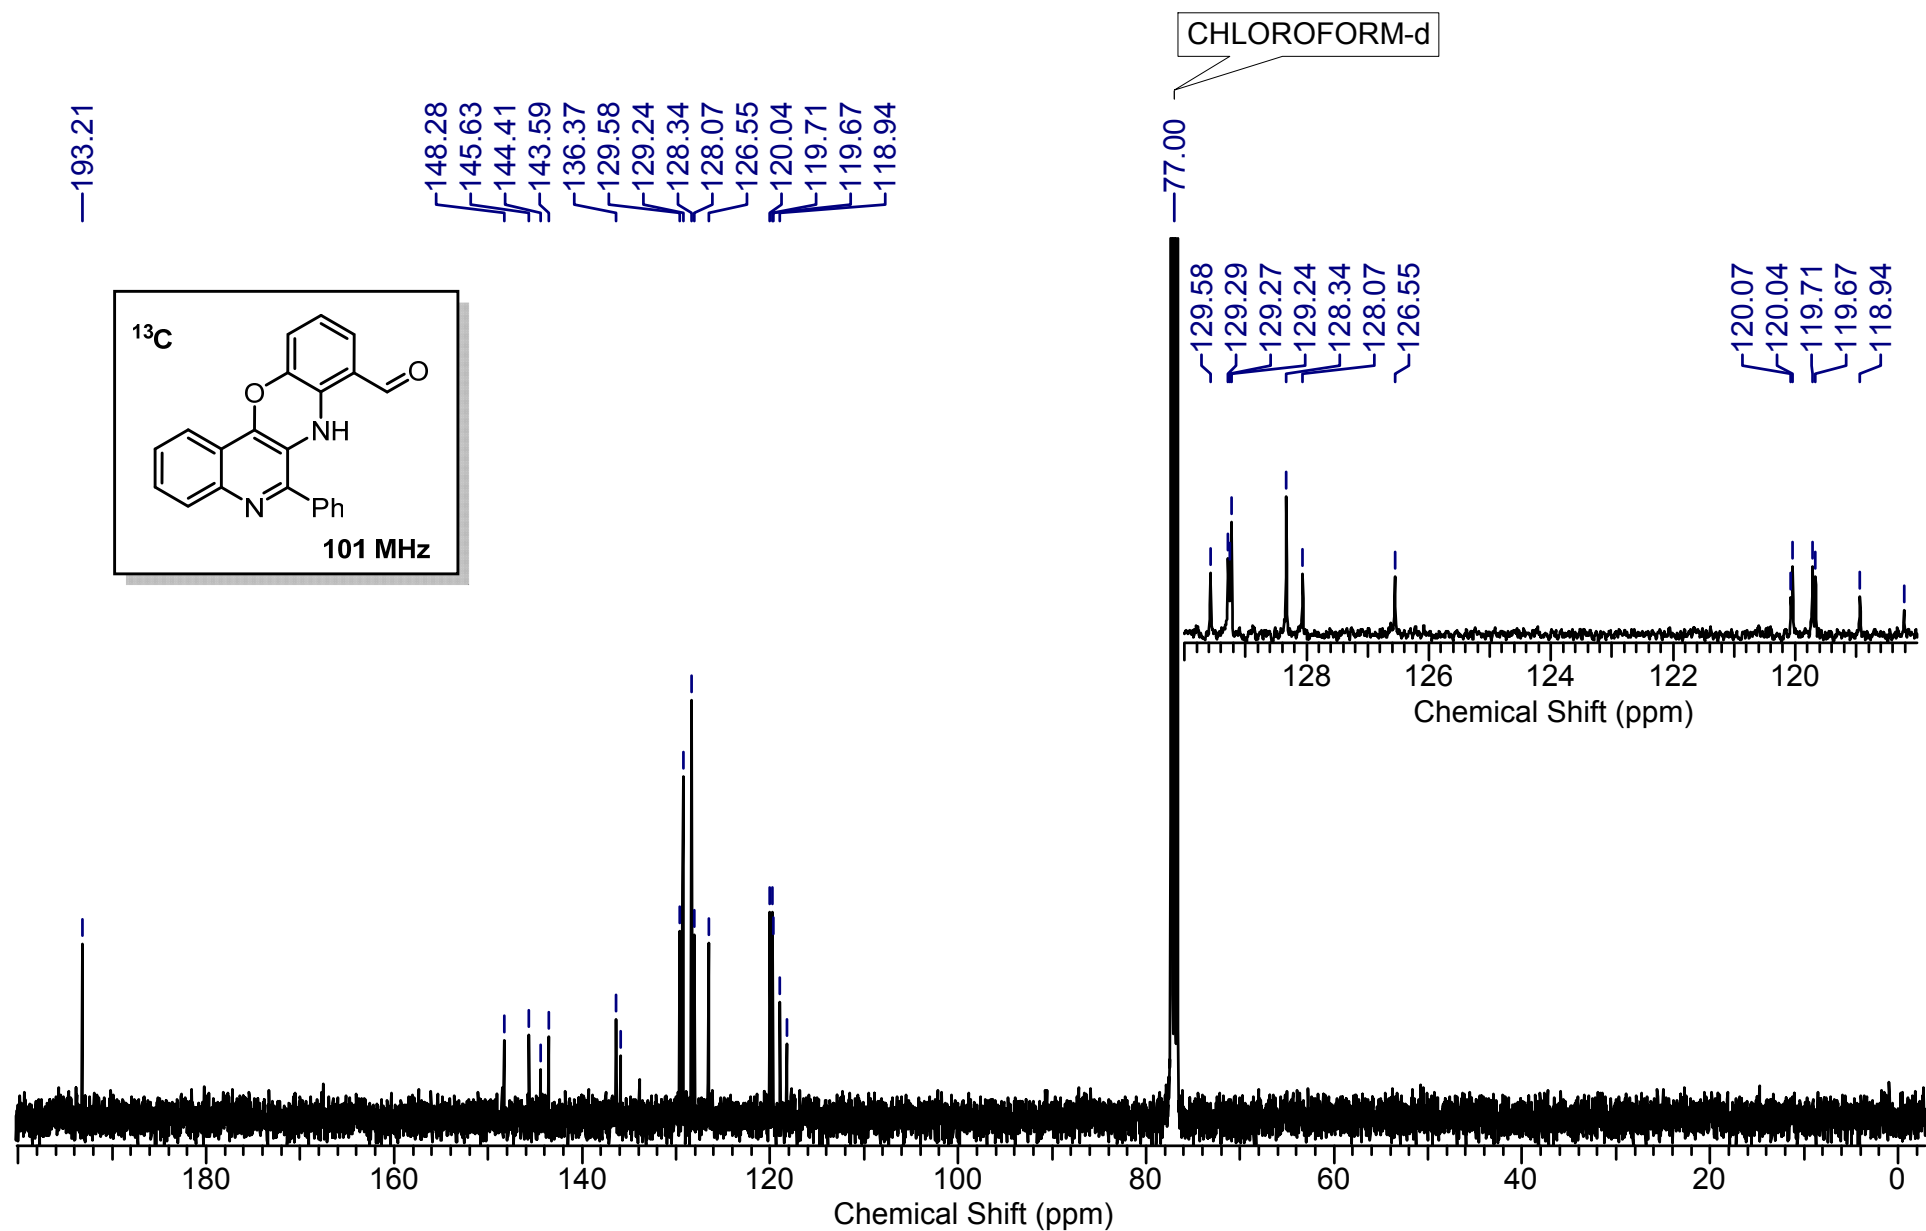

# 3aa

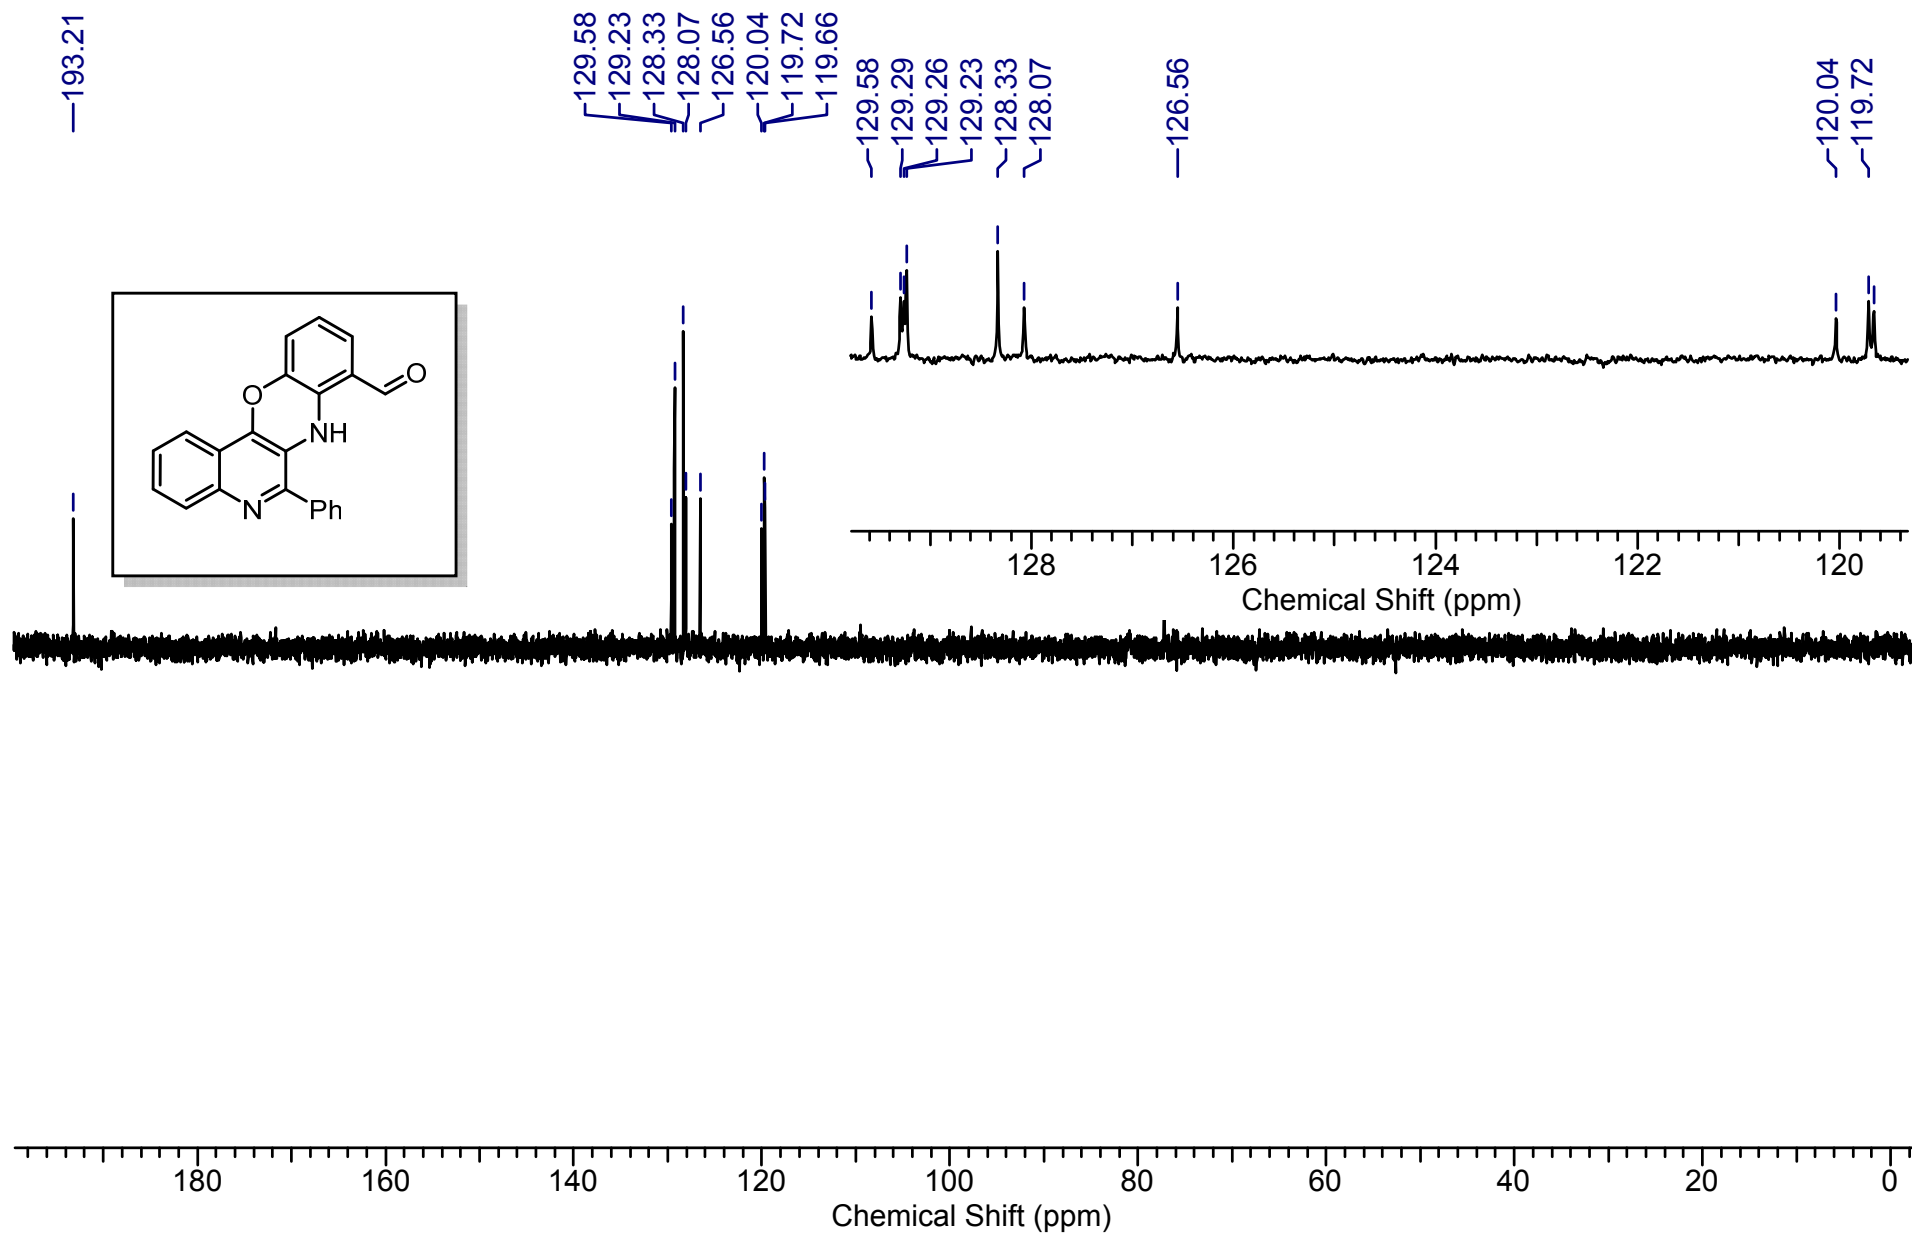

# 3aa

Main-Substrate #613 RT: 2.73 AV: 1 NL: 3.32E8  
T: FTMS + p ESI Full ms [100.0000-1500.0000]

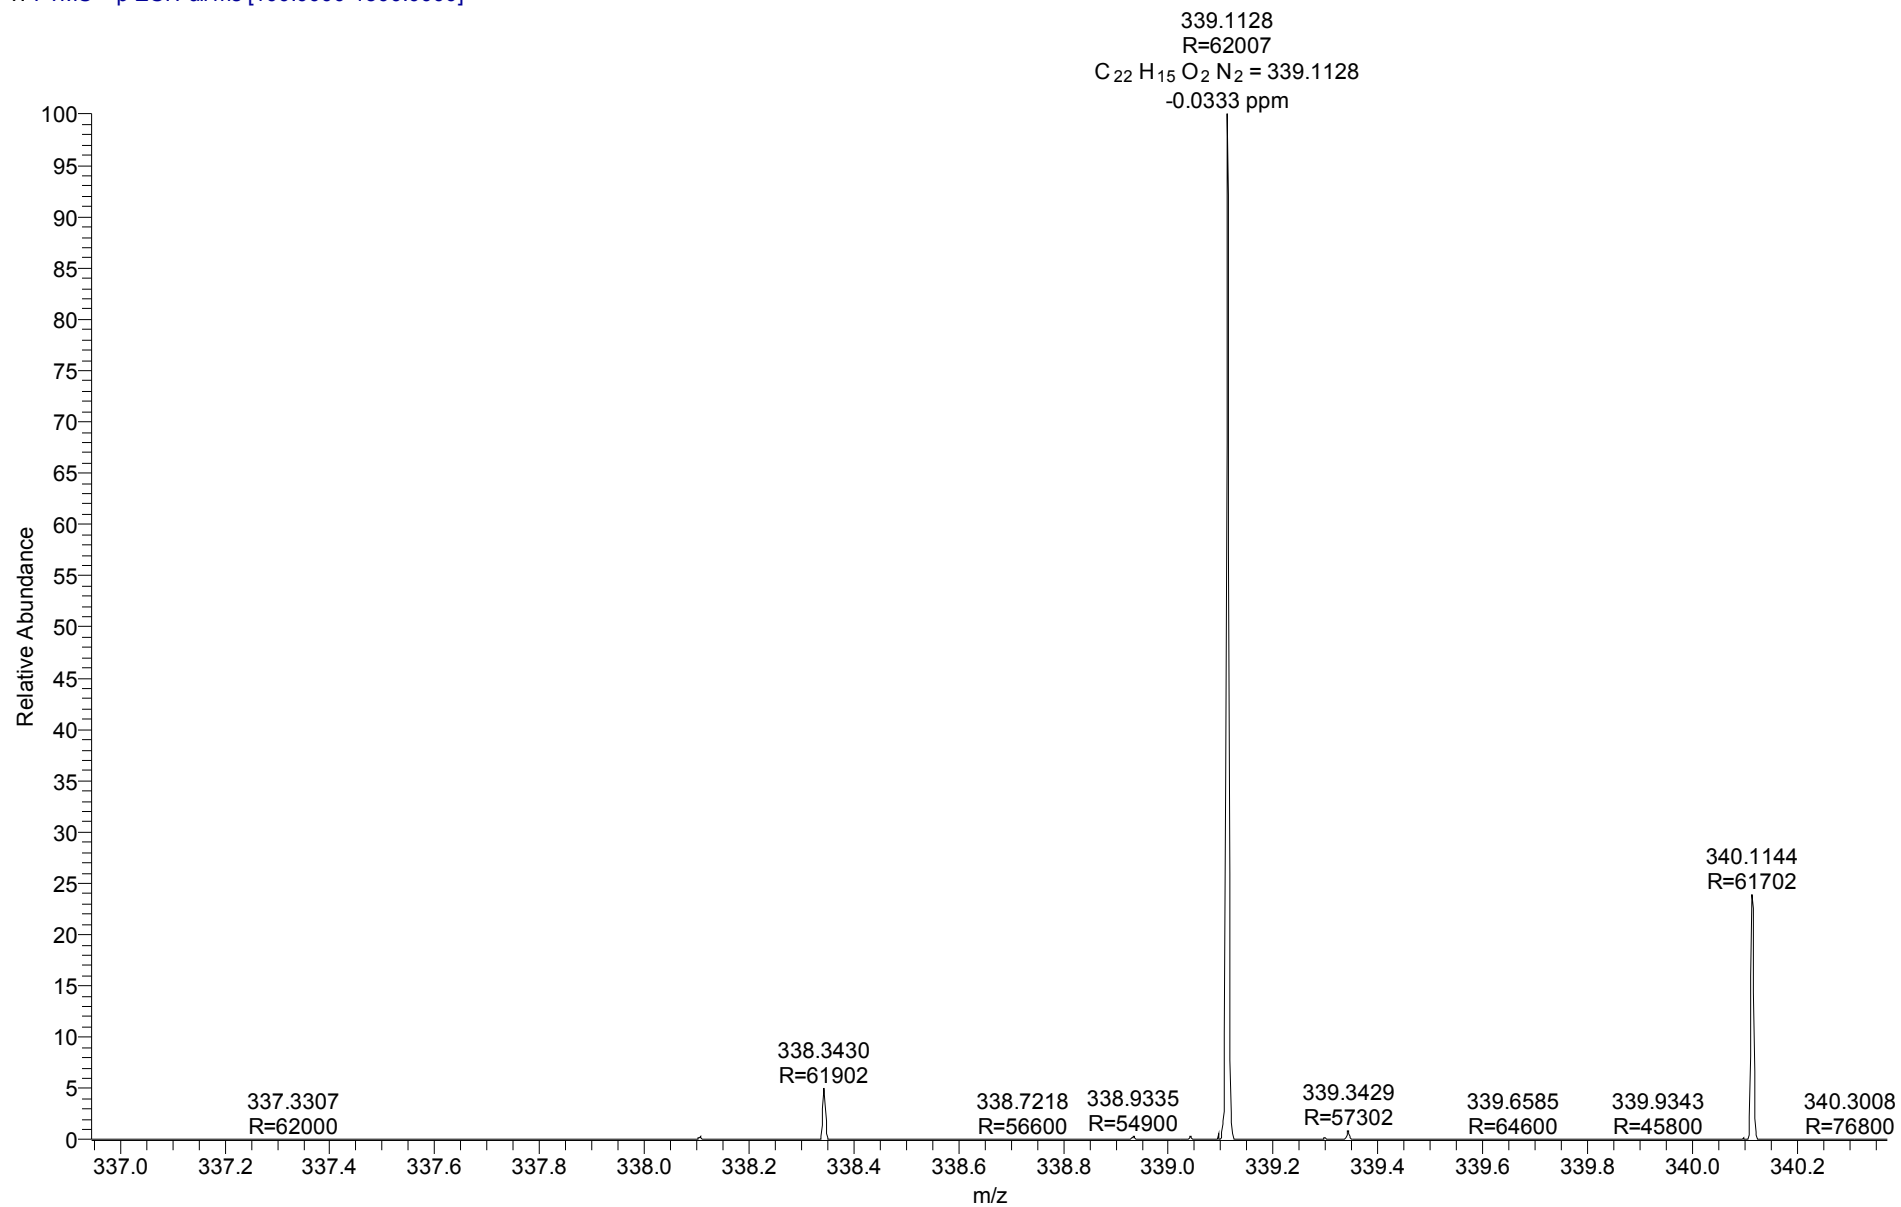



# 3ba

9.69 9.39  
8.10 7.74 7.72 7.70 7.62 7.60 7.52 7.52 7.27 7.07 7.05 7.05 6.85 6.70

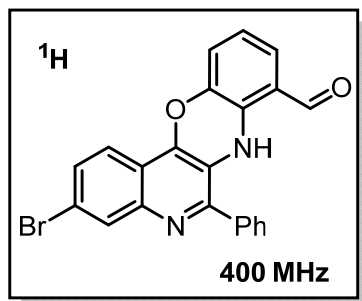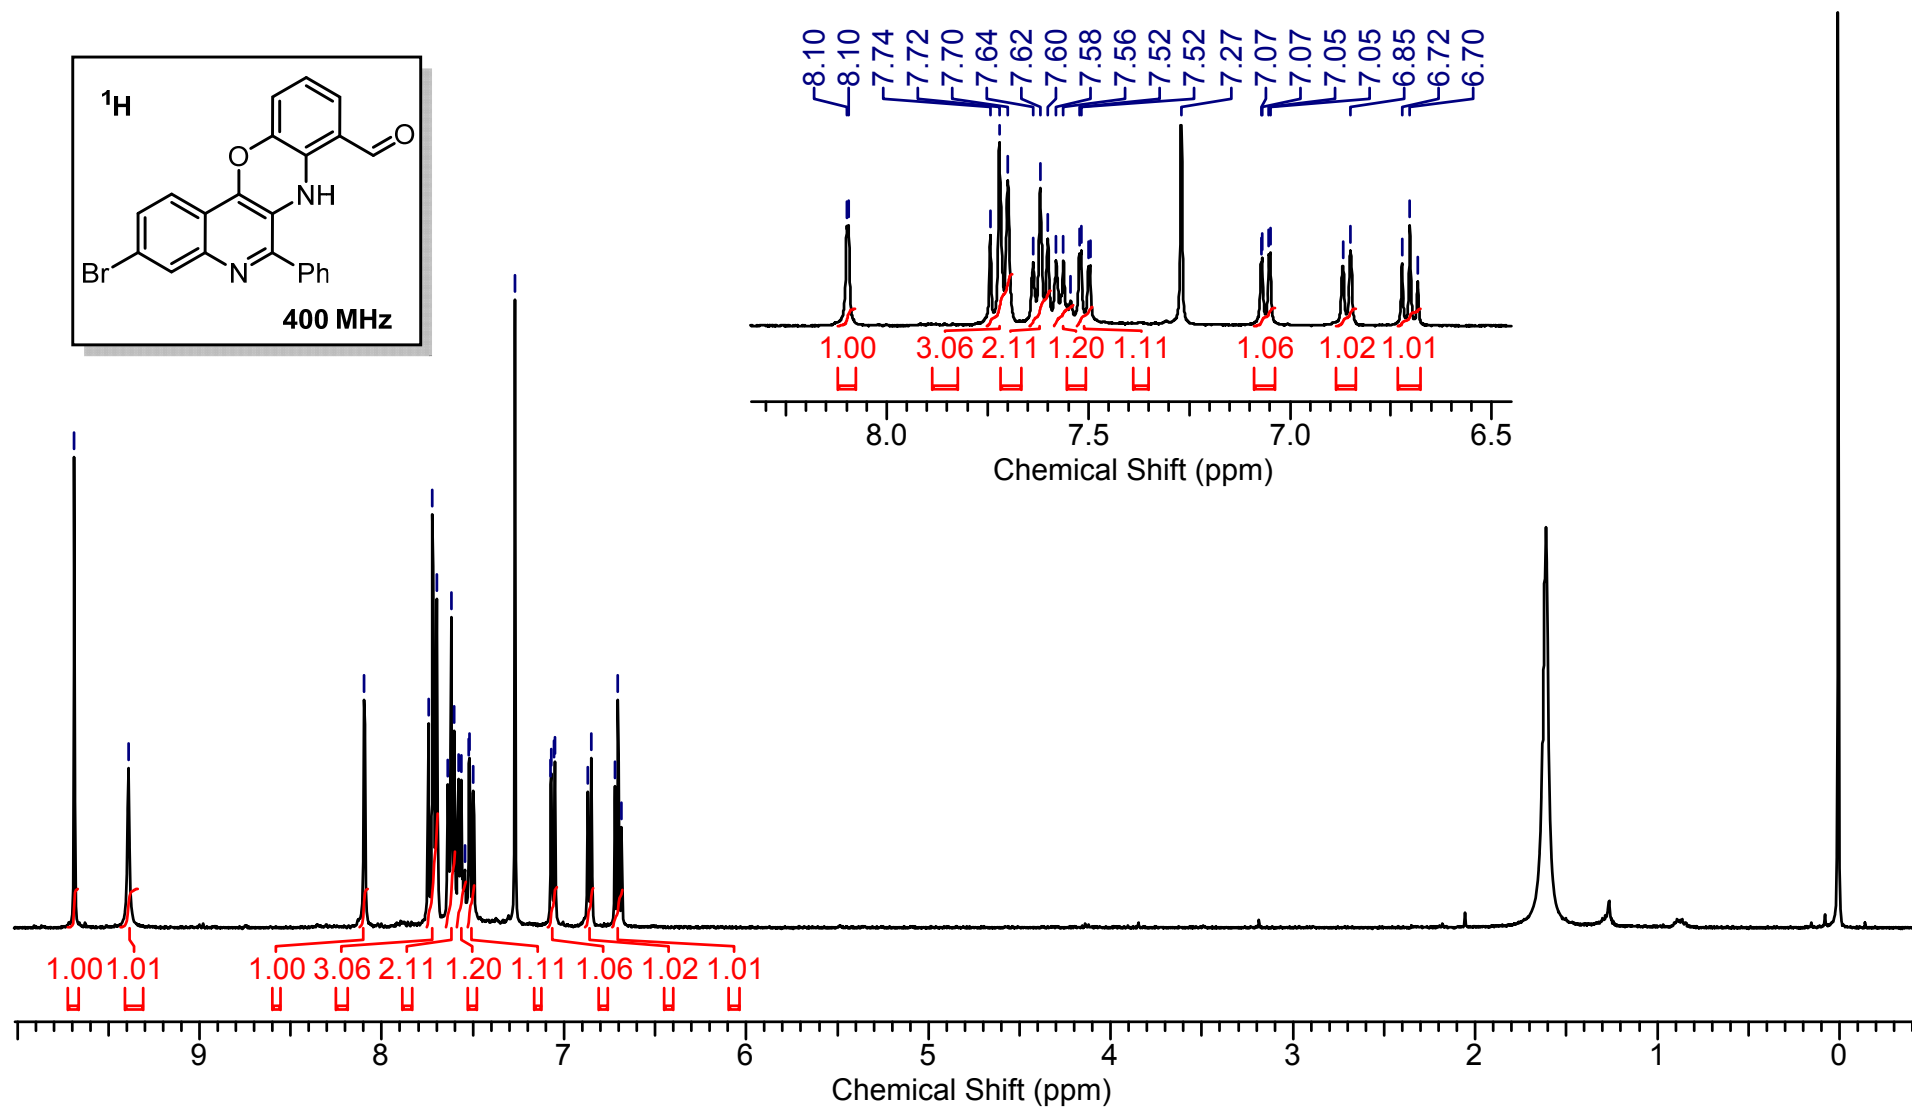

# 3ba

193.23

149.10  
146.01  
143.31  
131.42  
129.97  
129.82  
129.47  
129.28  
128.23  
121.15  
120.53  
120.27  
119.79  
119.02

77.31  
77.00  
76.68

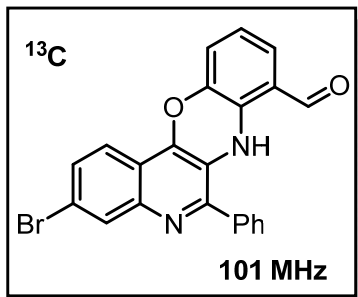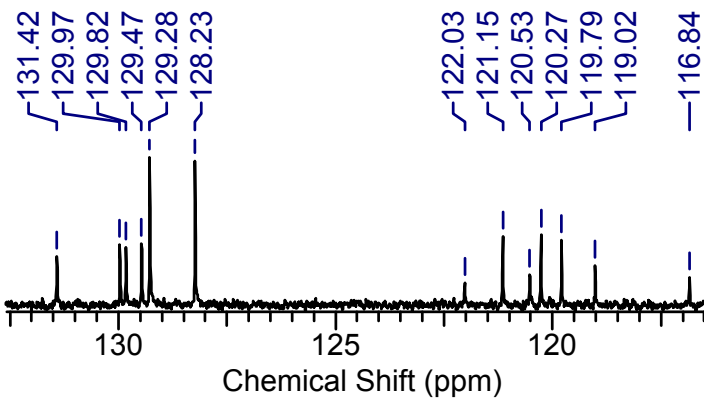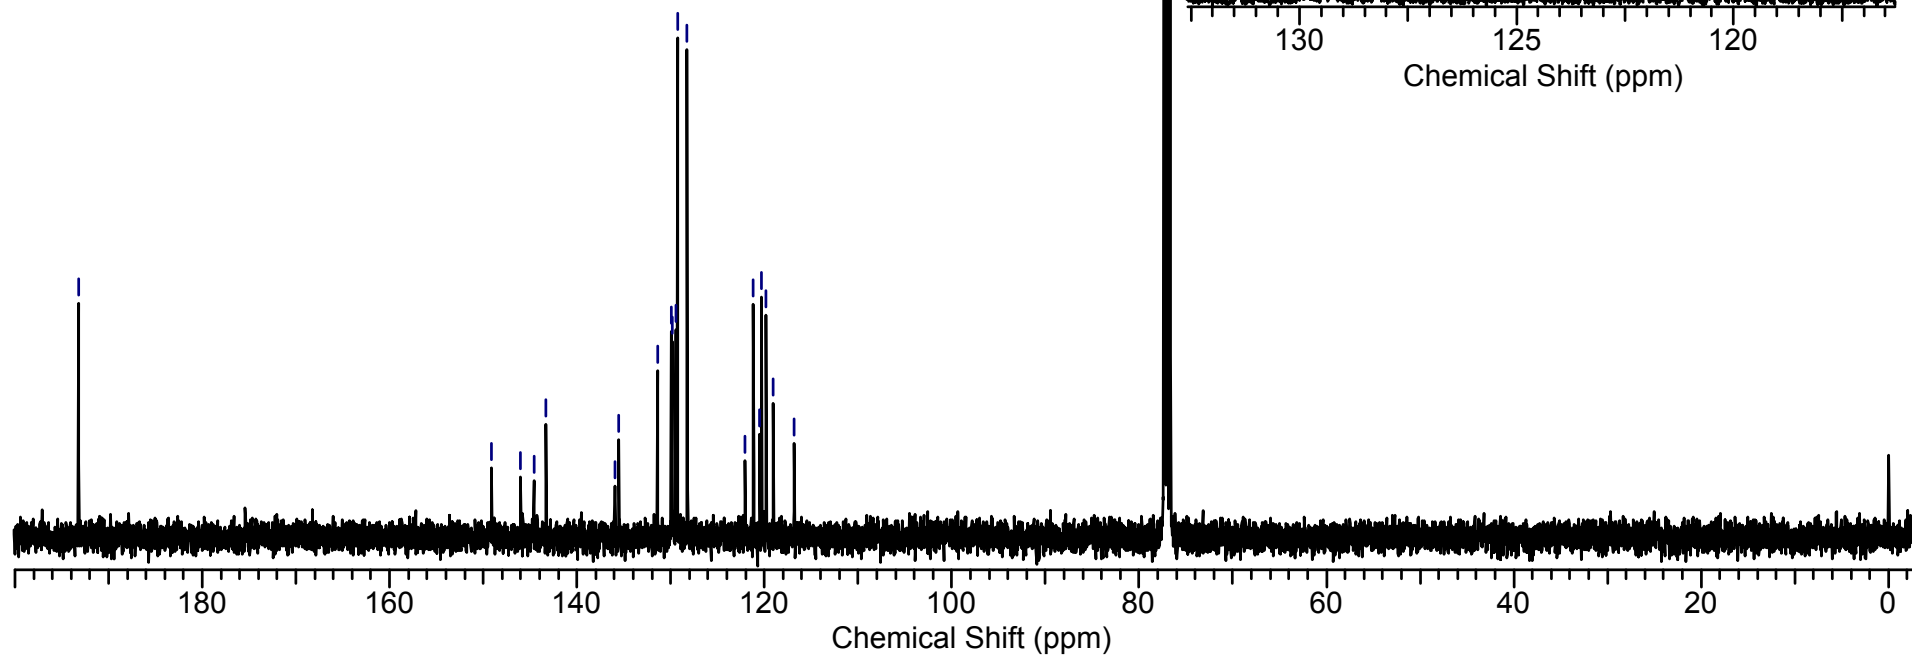

# 3ba

—193.23

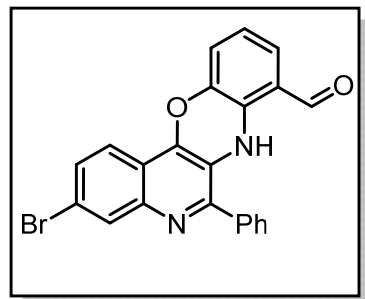

131.41  
129.97  
129.82  
129.46  
129.27  
128.23  
121.14  
120.27  
119.79

131.41  
129.97  
129.82  
129.46  
129.27  
128.23

121.14  
120.27  
119.79

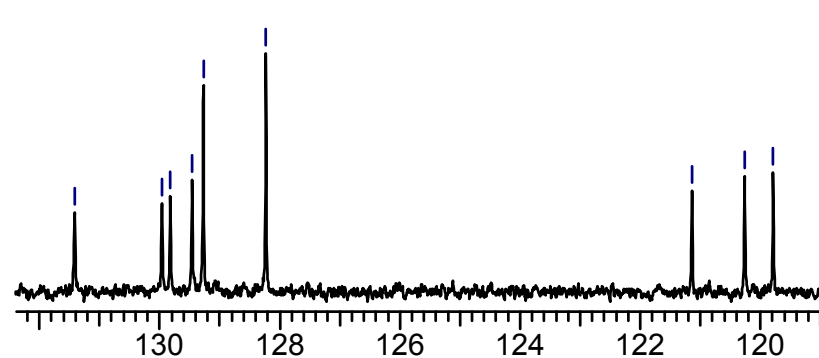

Chemical Shift (ppm)

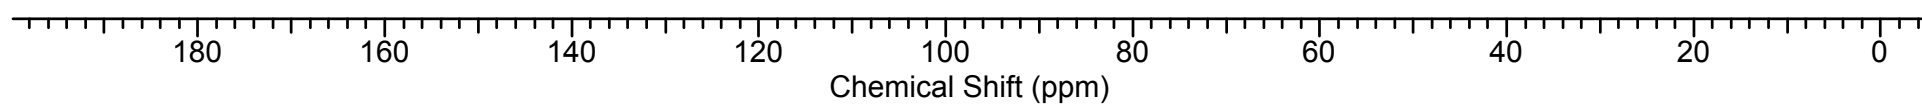

# 3ba

SVH-766 #835 RT: 3.72 AV: 1 NL: 1.58E7  
T: FTMS + p ESI Full ms [100.0000-1500.0000]

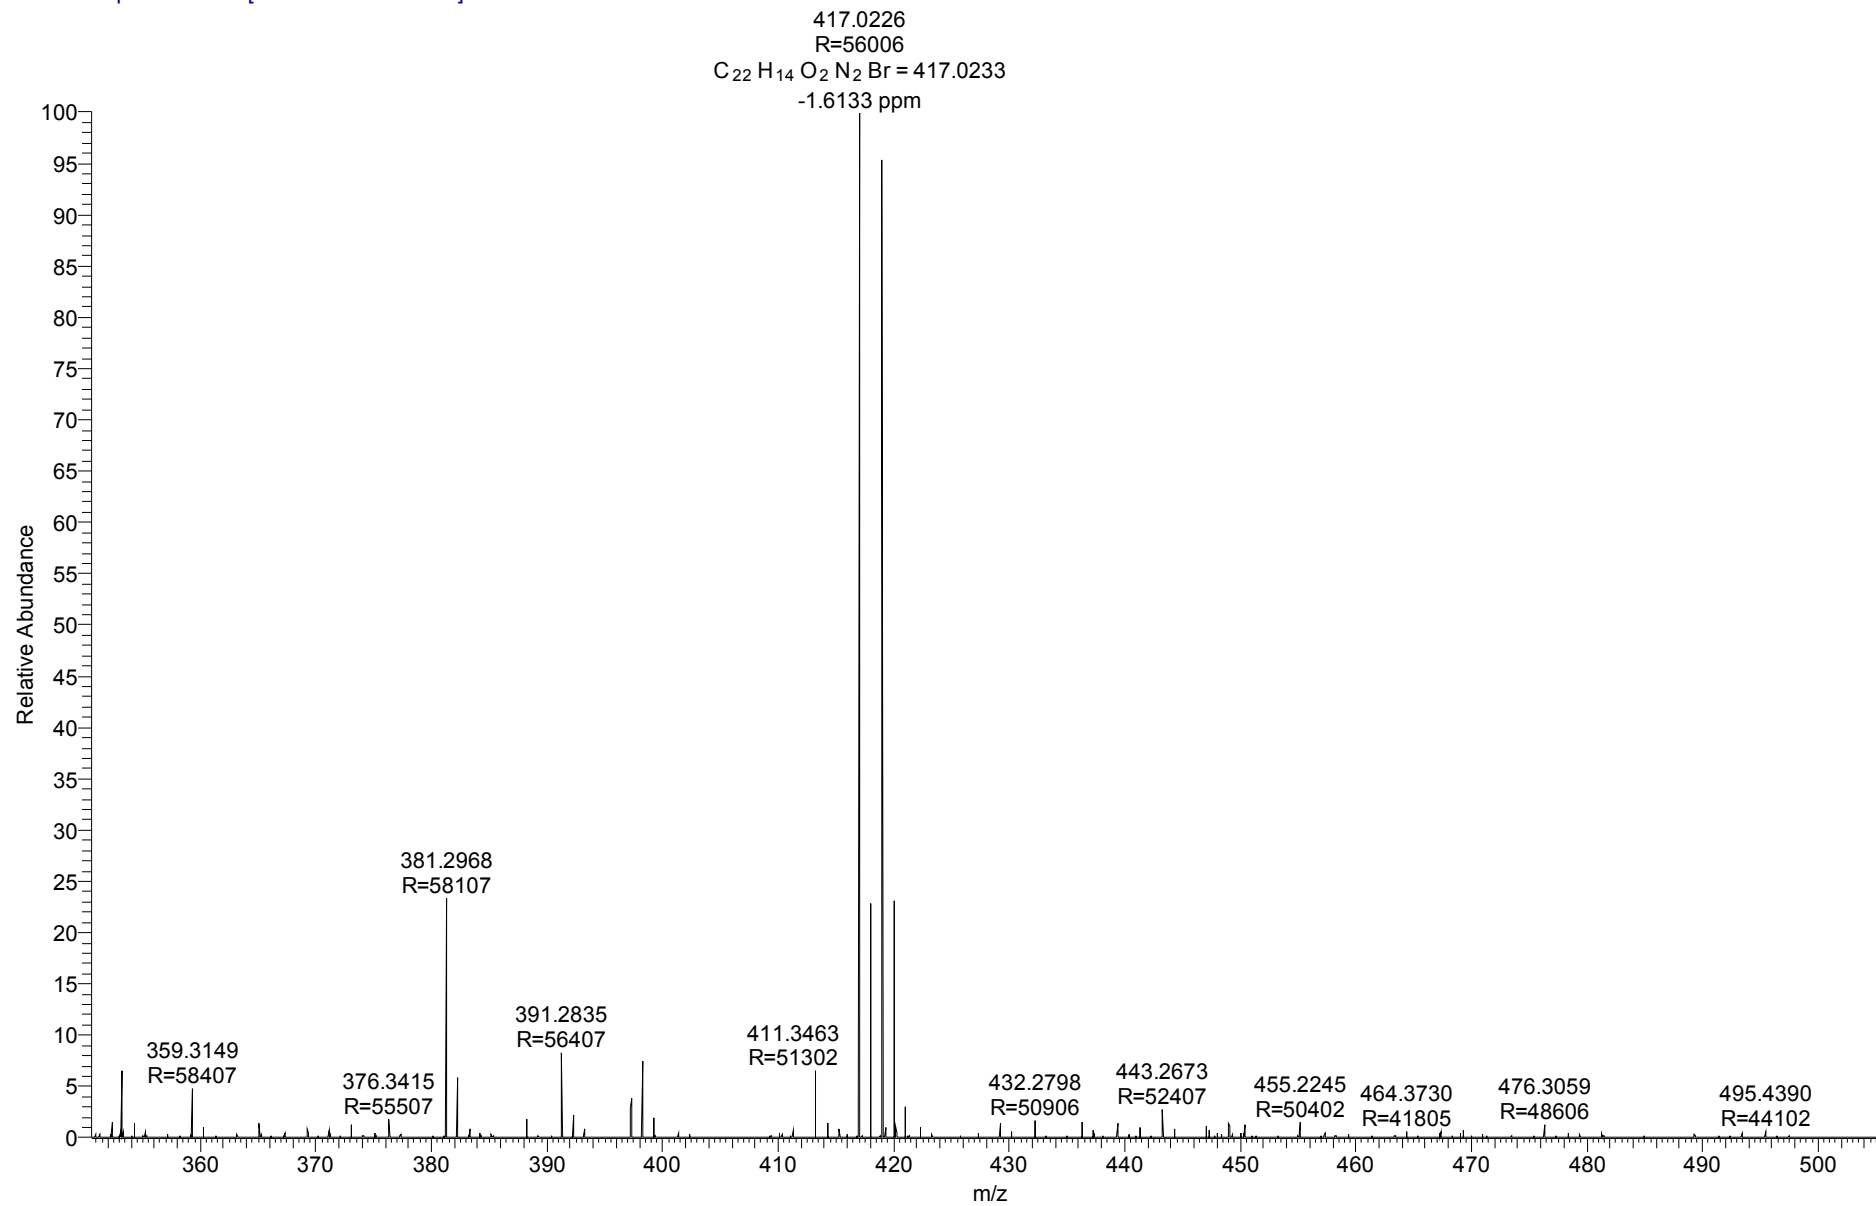

# 3ca

9.69  
9.39  
7.86  
7.84  
7.73  
7.71  
7.62  
7.60  
7.58  
7.57  
7.27  
7.07  
7.07  
7.05  
6.85  
6.69

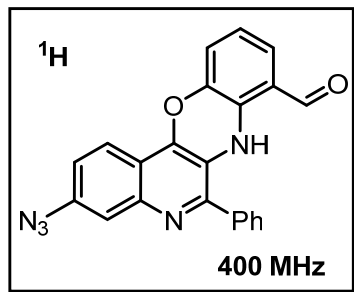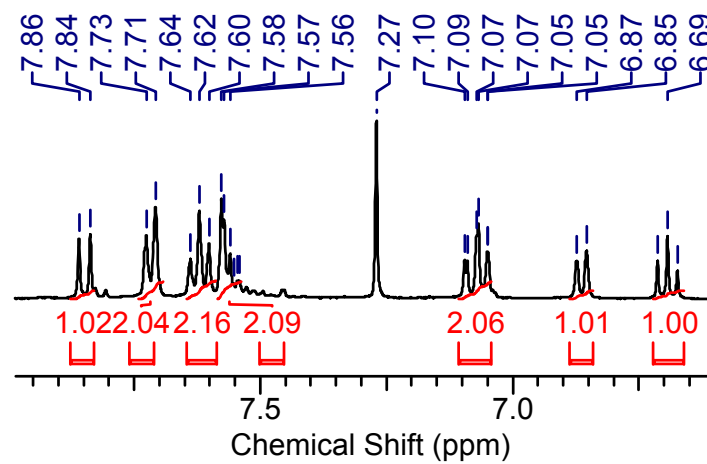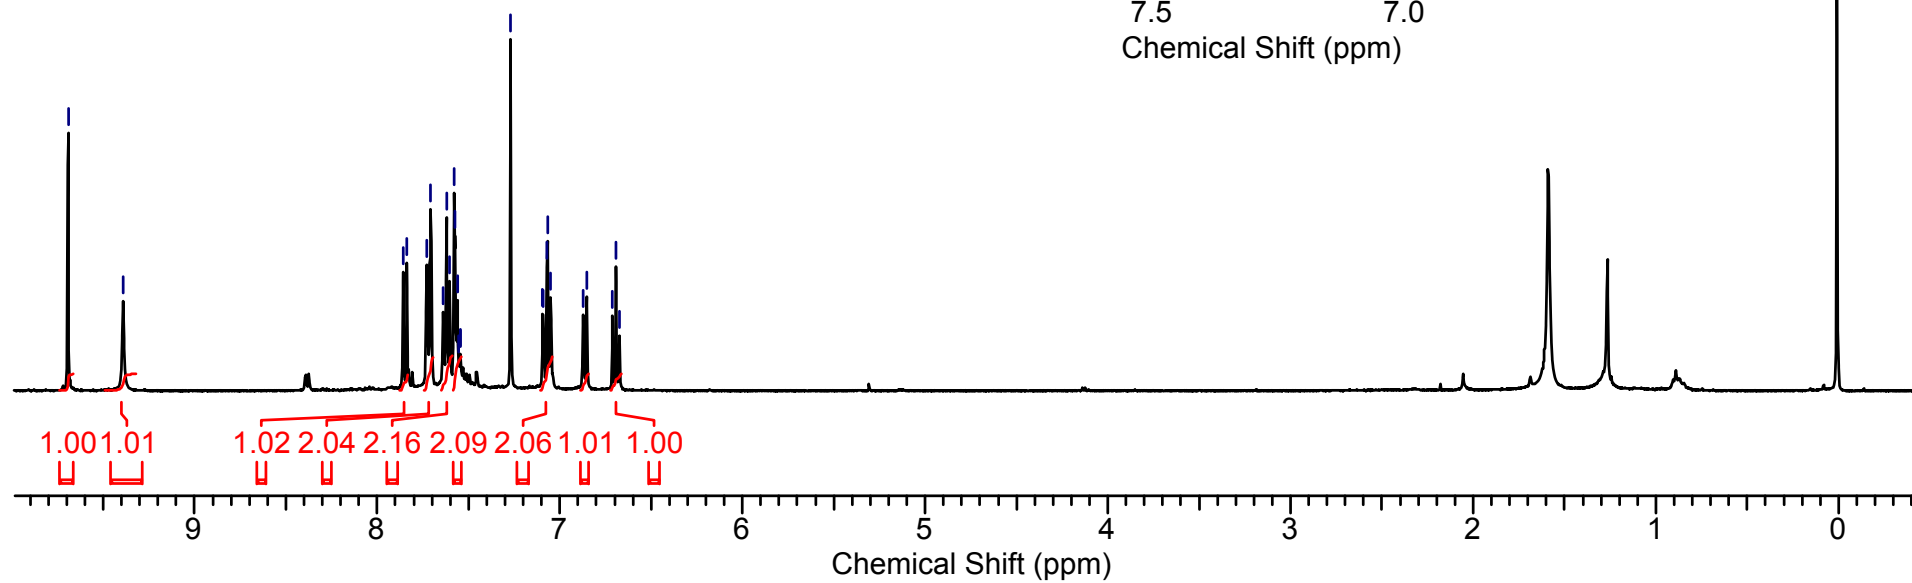

# 3ca

—193.19

149.19  
146.12  
144.68  
140.23  
135.65  
129.75  
129.43  
129.28  
128.22  
121.65  
120.06  
119.85  
119.74  
118.94  
117.02

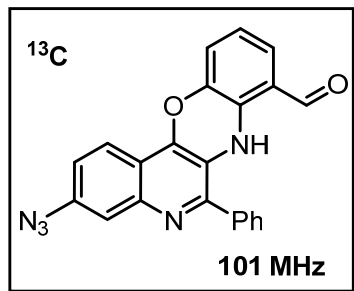

77.32  
129.75  
77.00  
129.43  
76.68  
129.28  
128.22

121.65  
120.06  
119.85  
119.80  
119.74  
118.94  
117.02  
115.66

125  
120  
Chemical Shift (ppm)

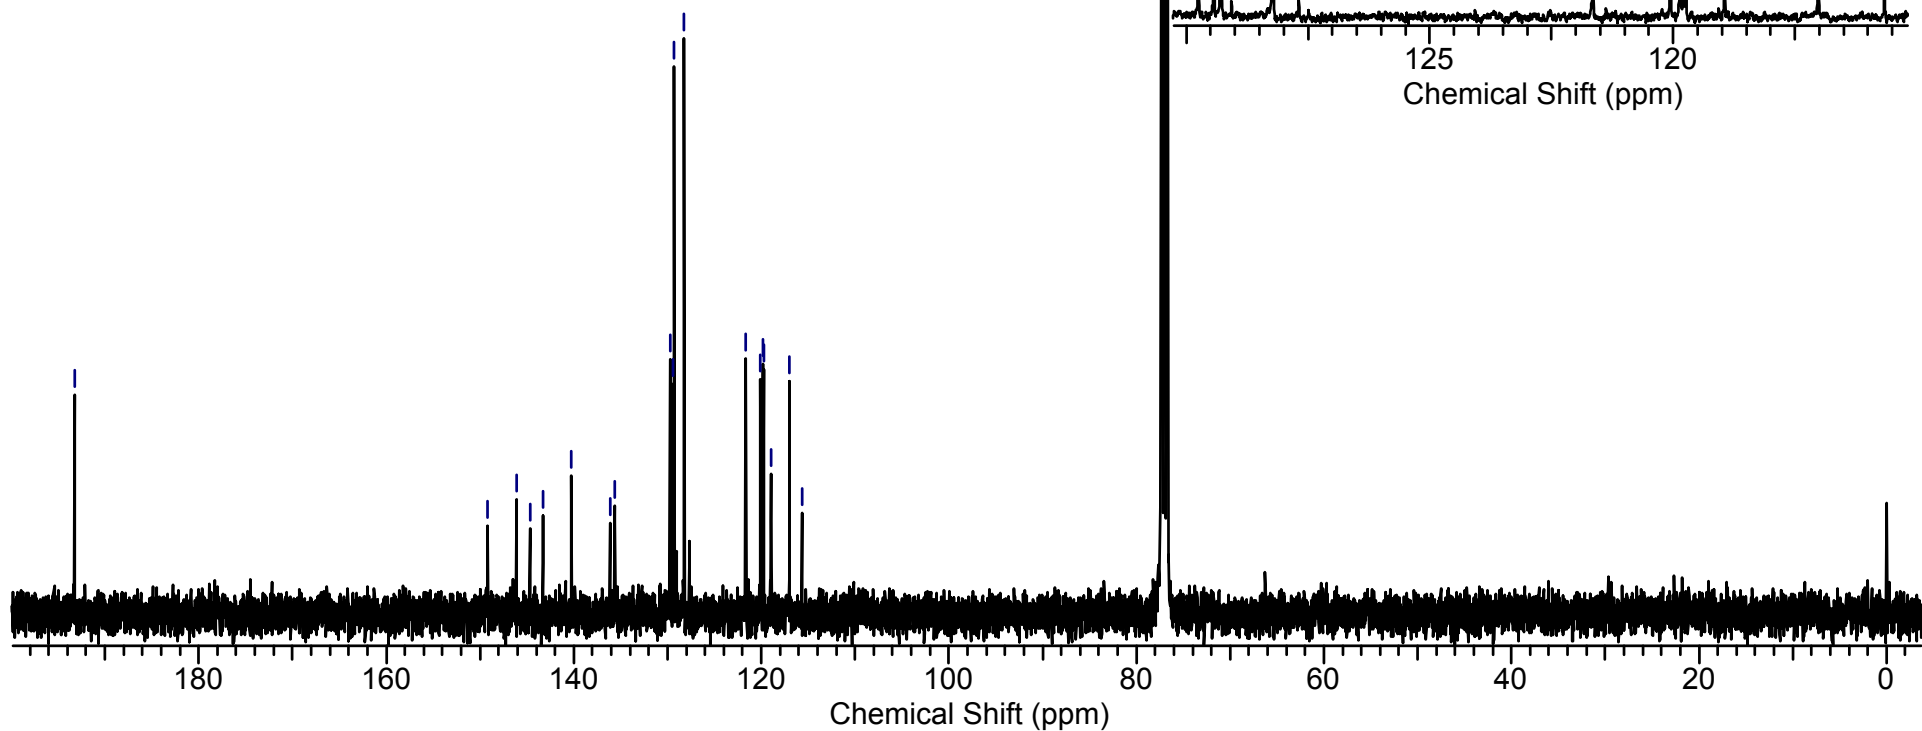

# 3ca

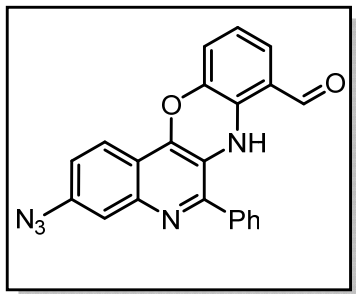

193.19

129.75  
129.43  
129.28  
128.21  
121.65  
120.06  
119.85  
119.73  
117.02

129.75  
129.43  
129.28

128.21

121.65

120.06  
119.85  
119.73

117.02

130 128 126 124 122 120 118  
Chemical Shift (ppm)

180 160 140 120 100 80 60 40 20 0  
Chemical Shift (ppm)

# 3ca

SVH-763 #757 RT: 3.37 AV: 1 NL: 1.64E8  
T: FTMS + p ESI Full ms [100.0000-1500.0000]

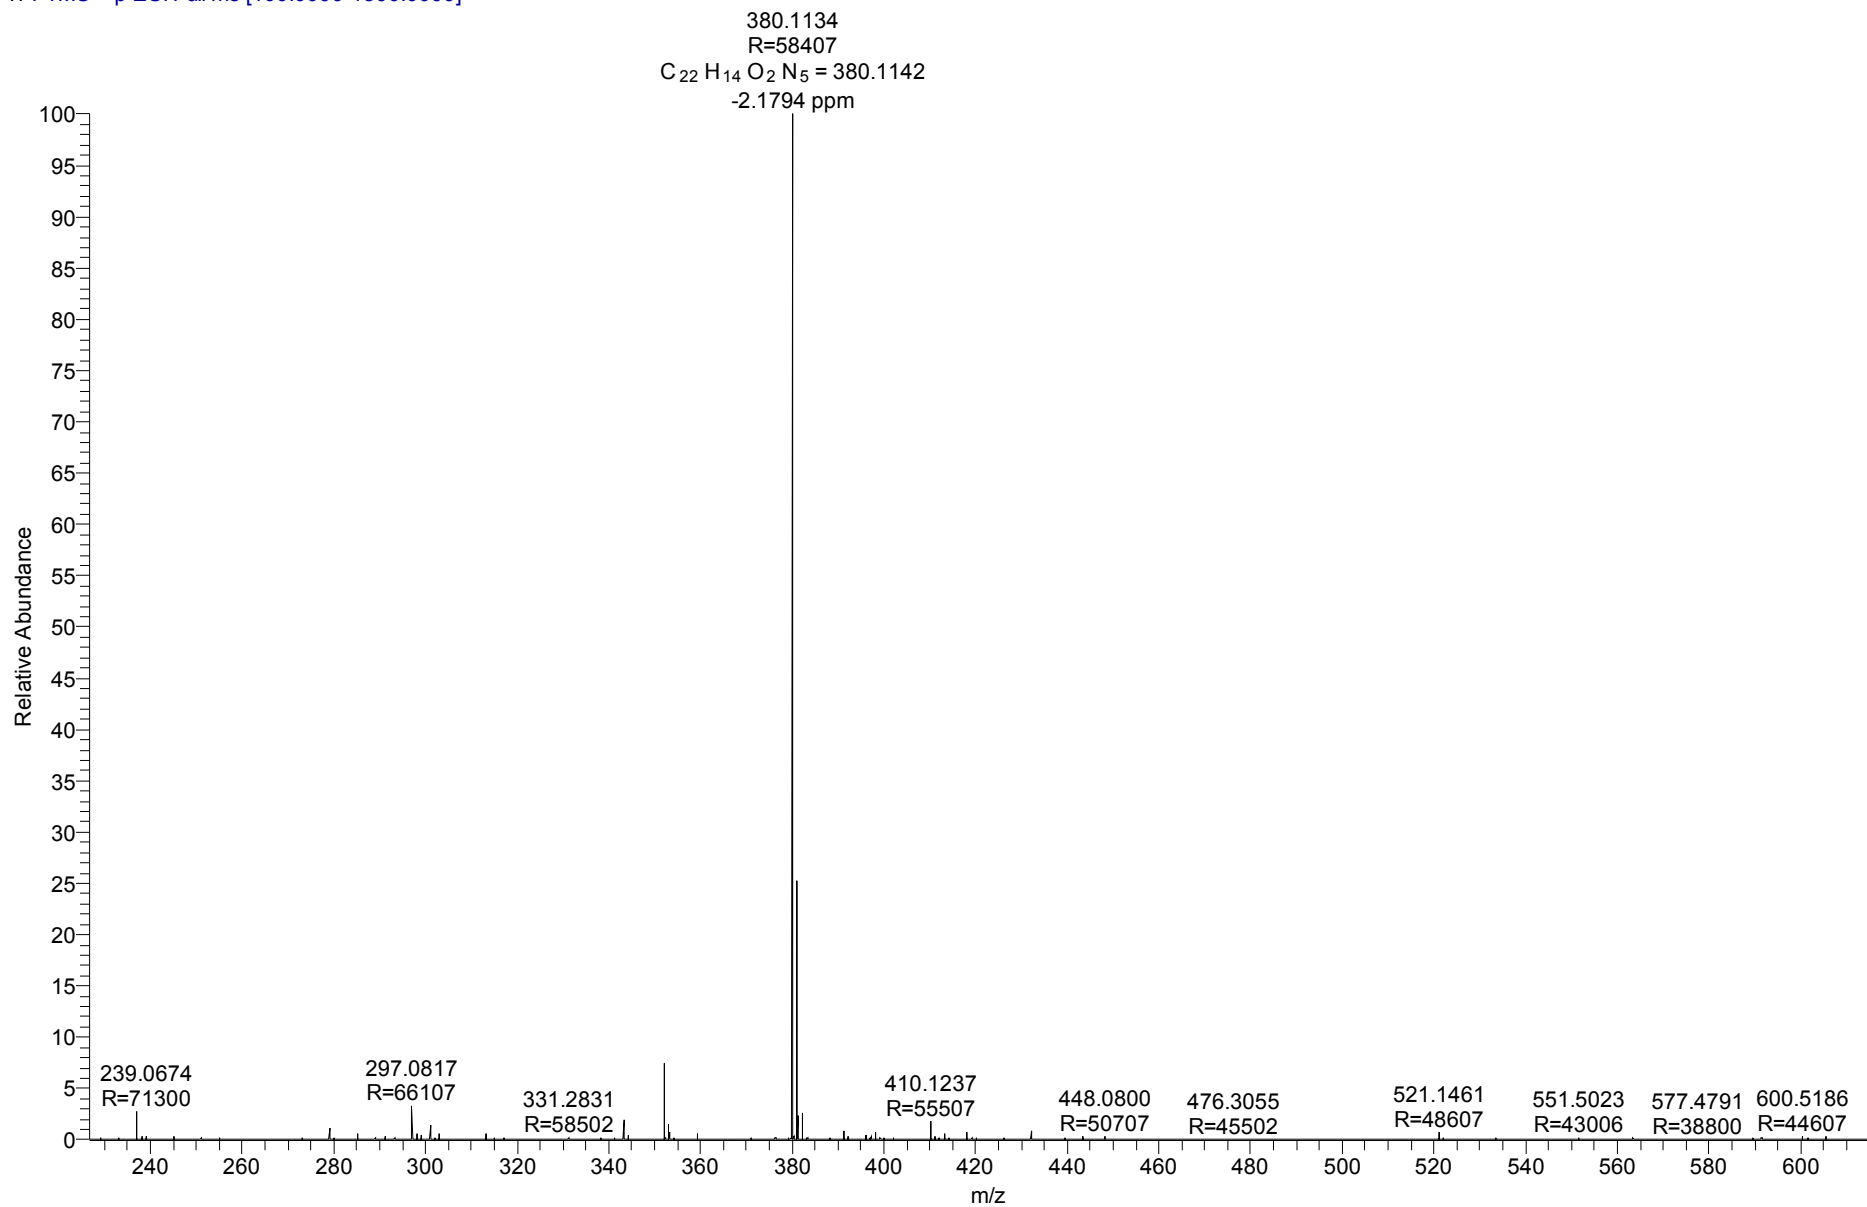



# 3da

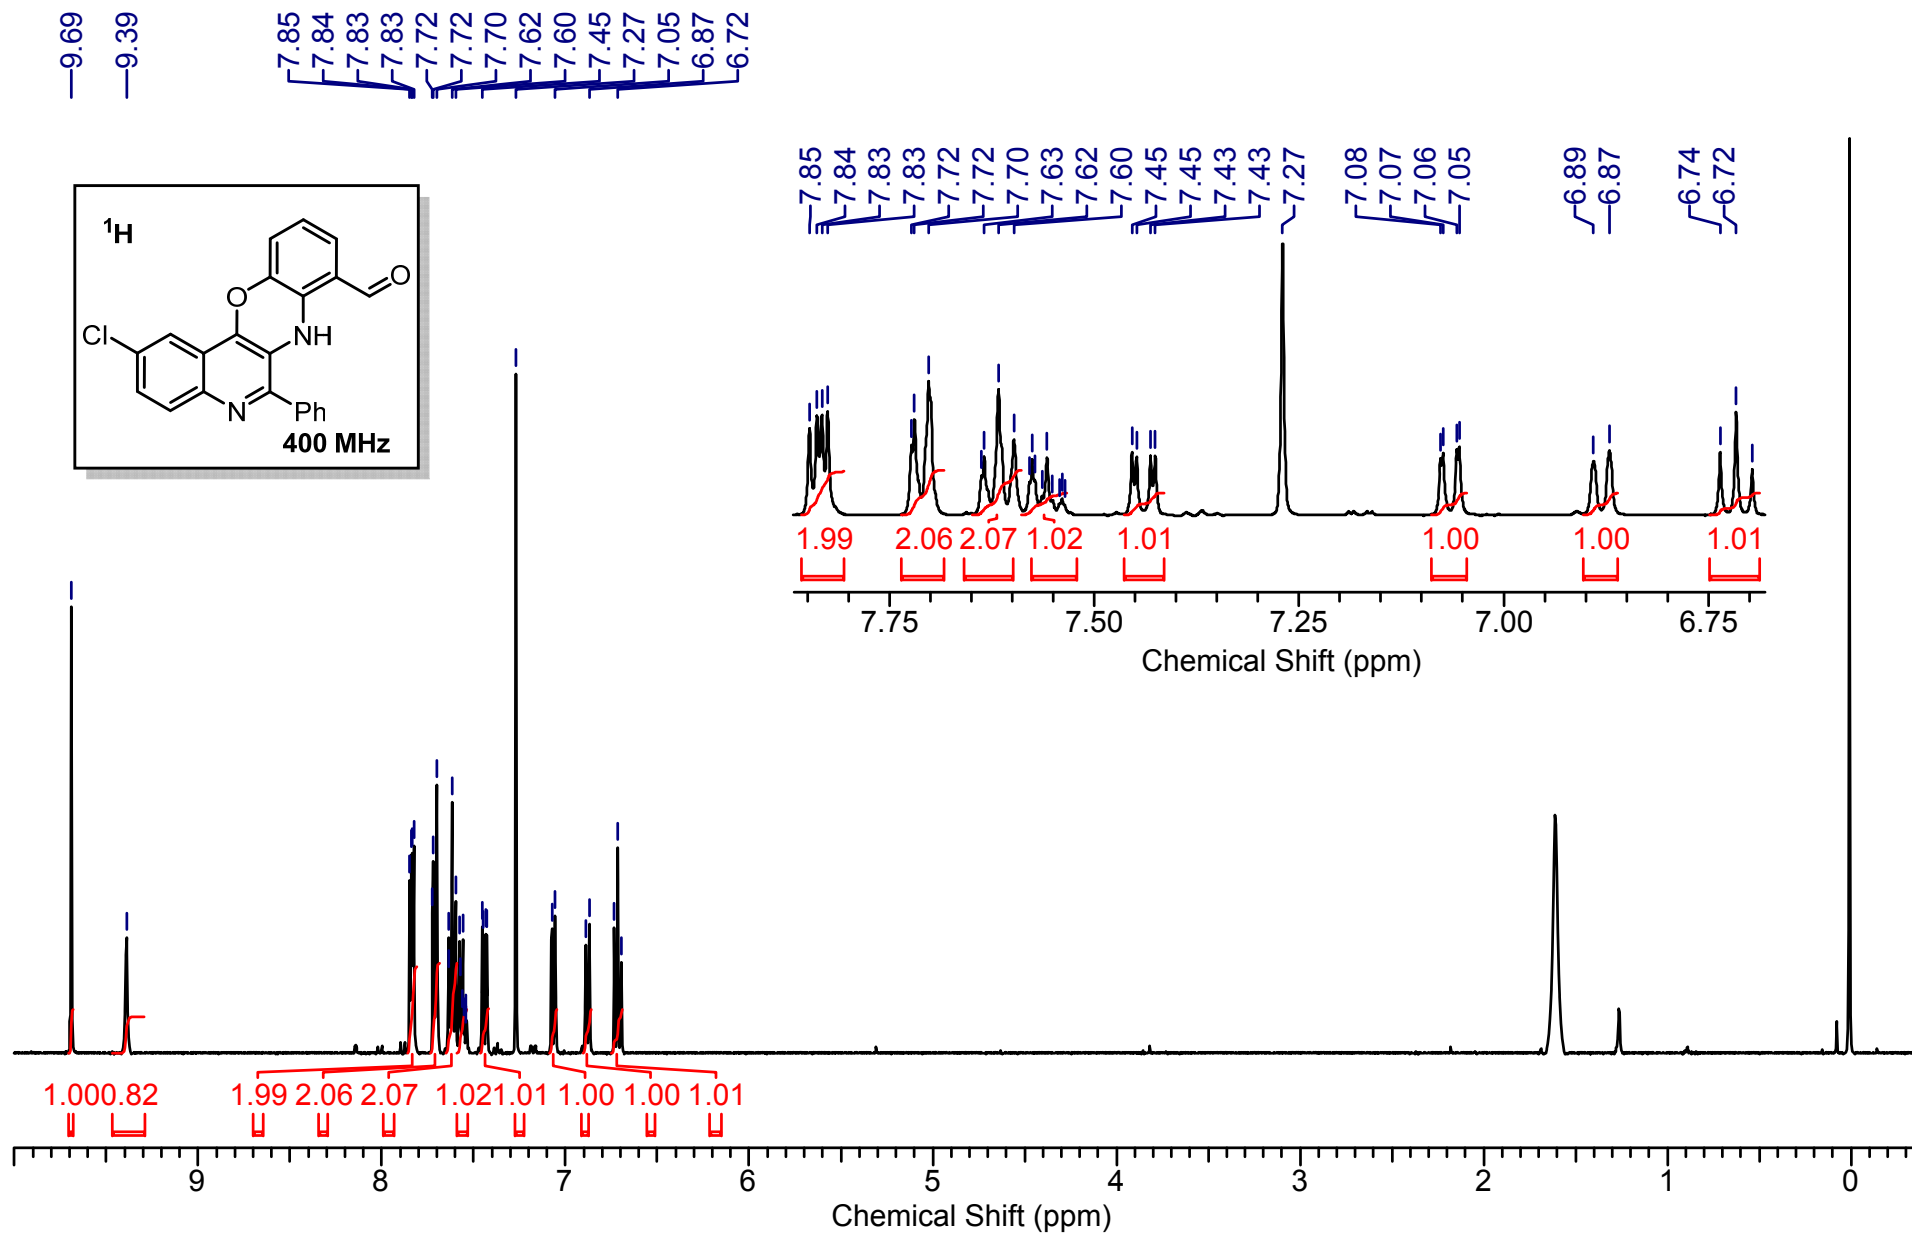

# 3da

193.27

148.43  
143.84  
143.38  
136.00  
132.58  
130.88  
129.76  
129.44  
129.28  
128.95  
128.23  
120.40  
119.84  
119.07  
118.64

77.31  
77.00  
76.68

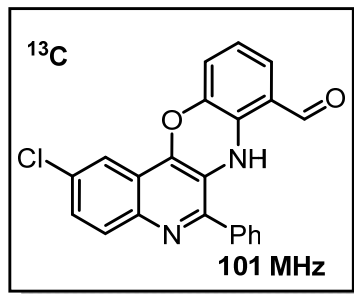

130.88  
129.76  
129.44  
129.28  
128.95  
128.23

120.93  
120.40  
119.84  
119.07  
118.80  
118.64

Chemical Shift (ppm)

Chemical Shift (ppm)

3da

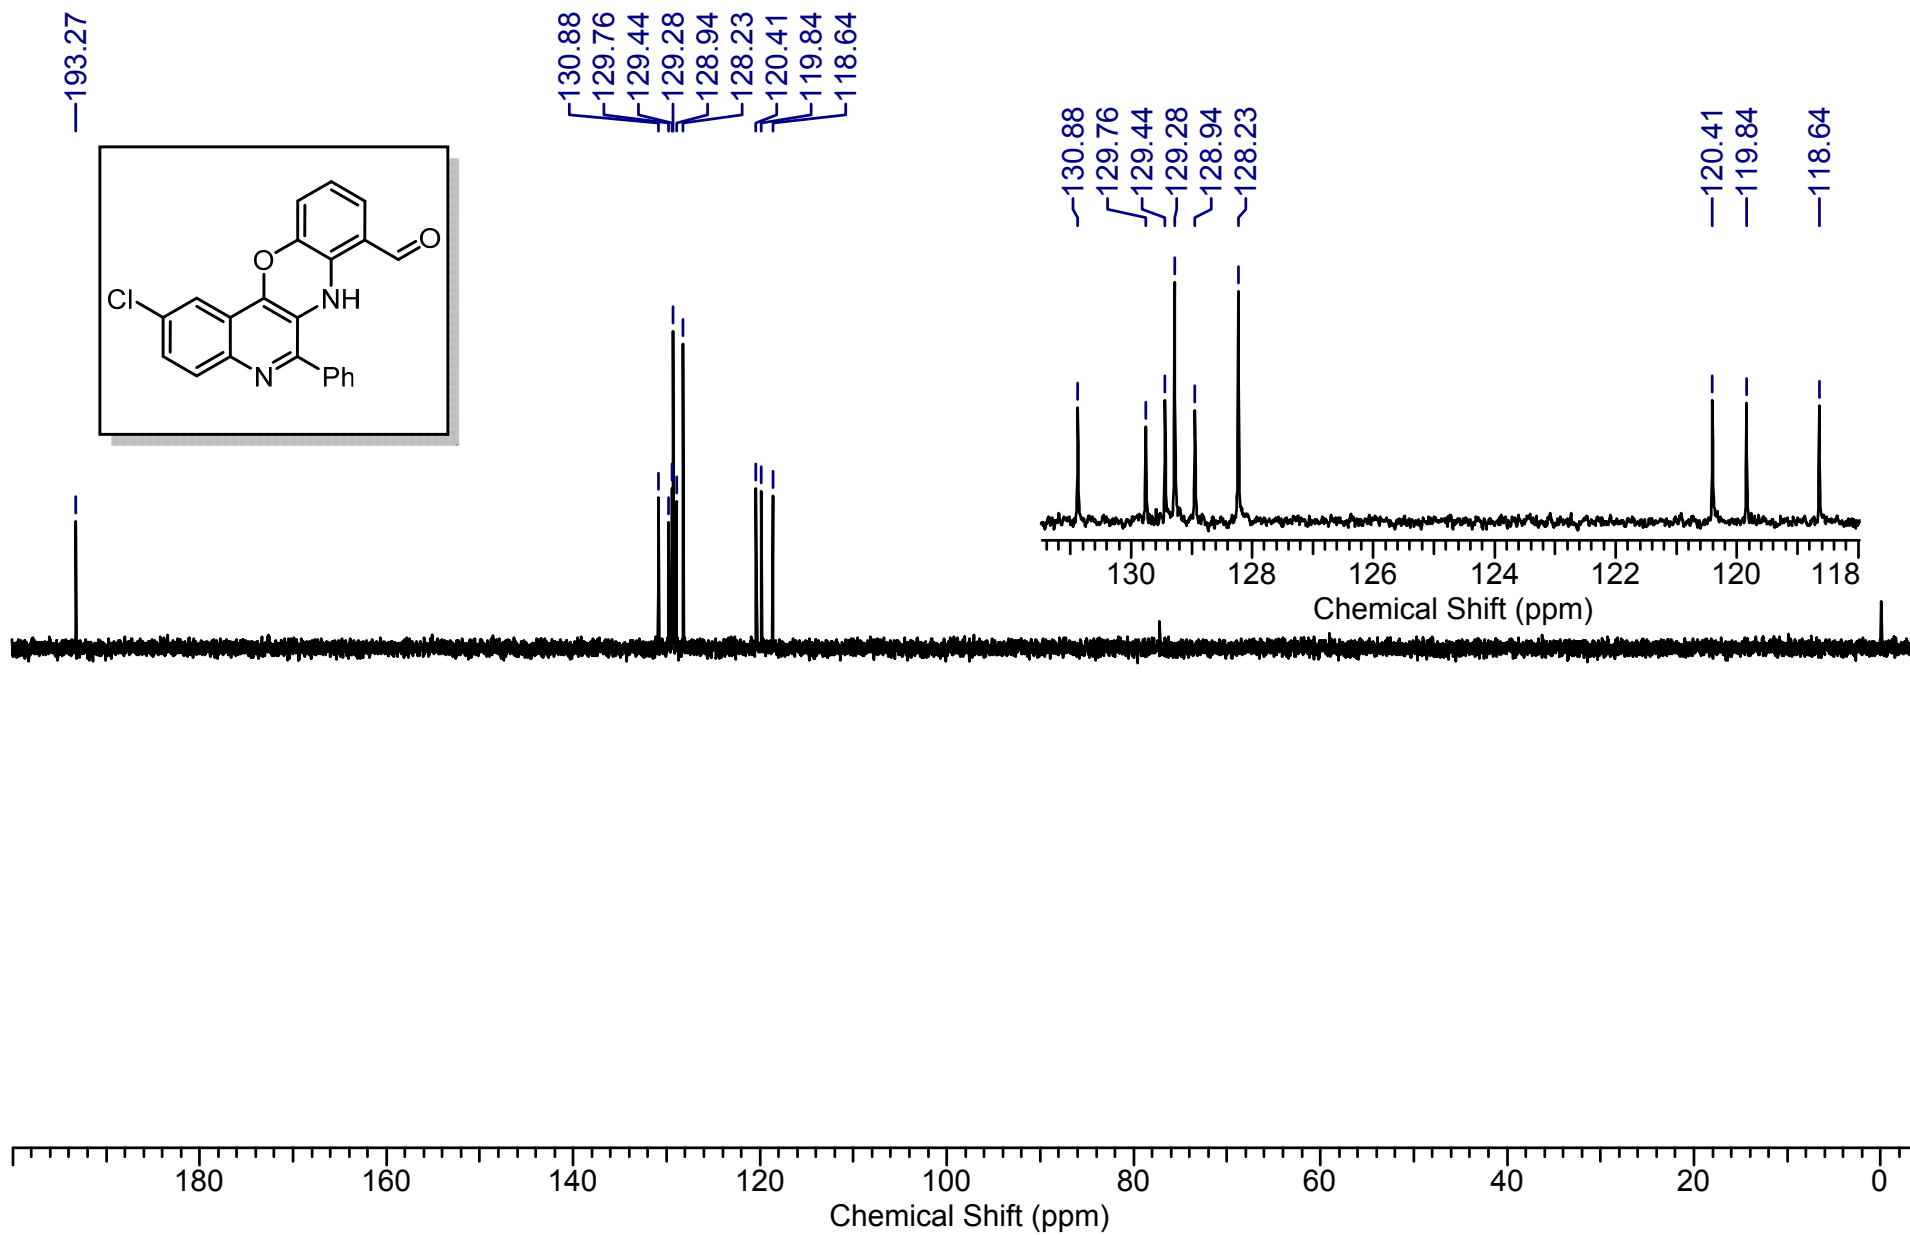

# 3da

SH-710 #492 RT: 2.65 AV: 1 NL: 2.81E7  
T: FTMS + p ESI Full ms [100.0000-1500.0000]

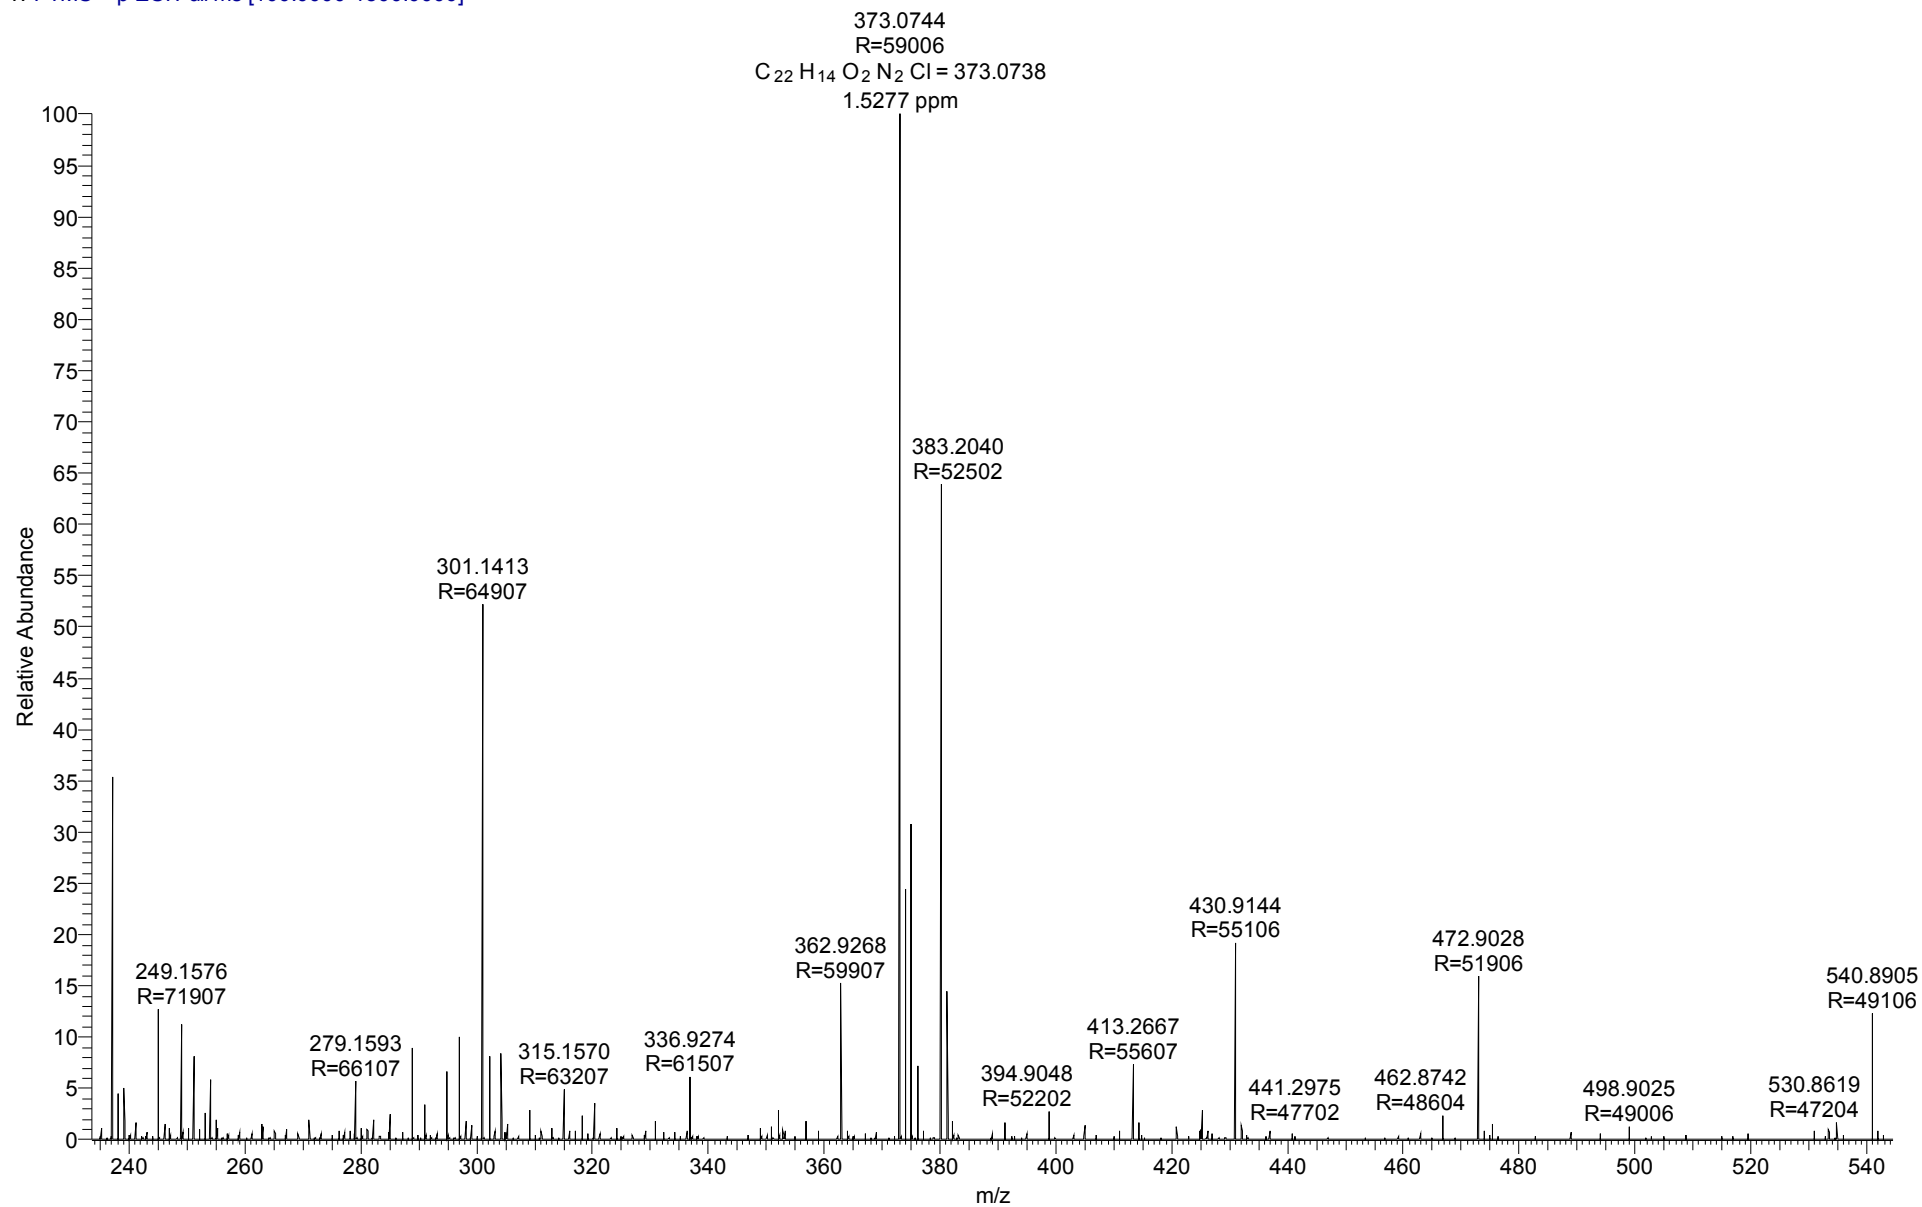

# 3ea

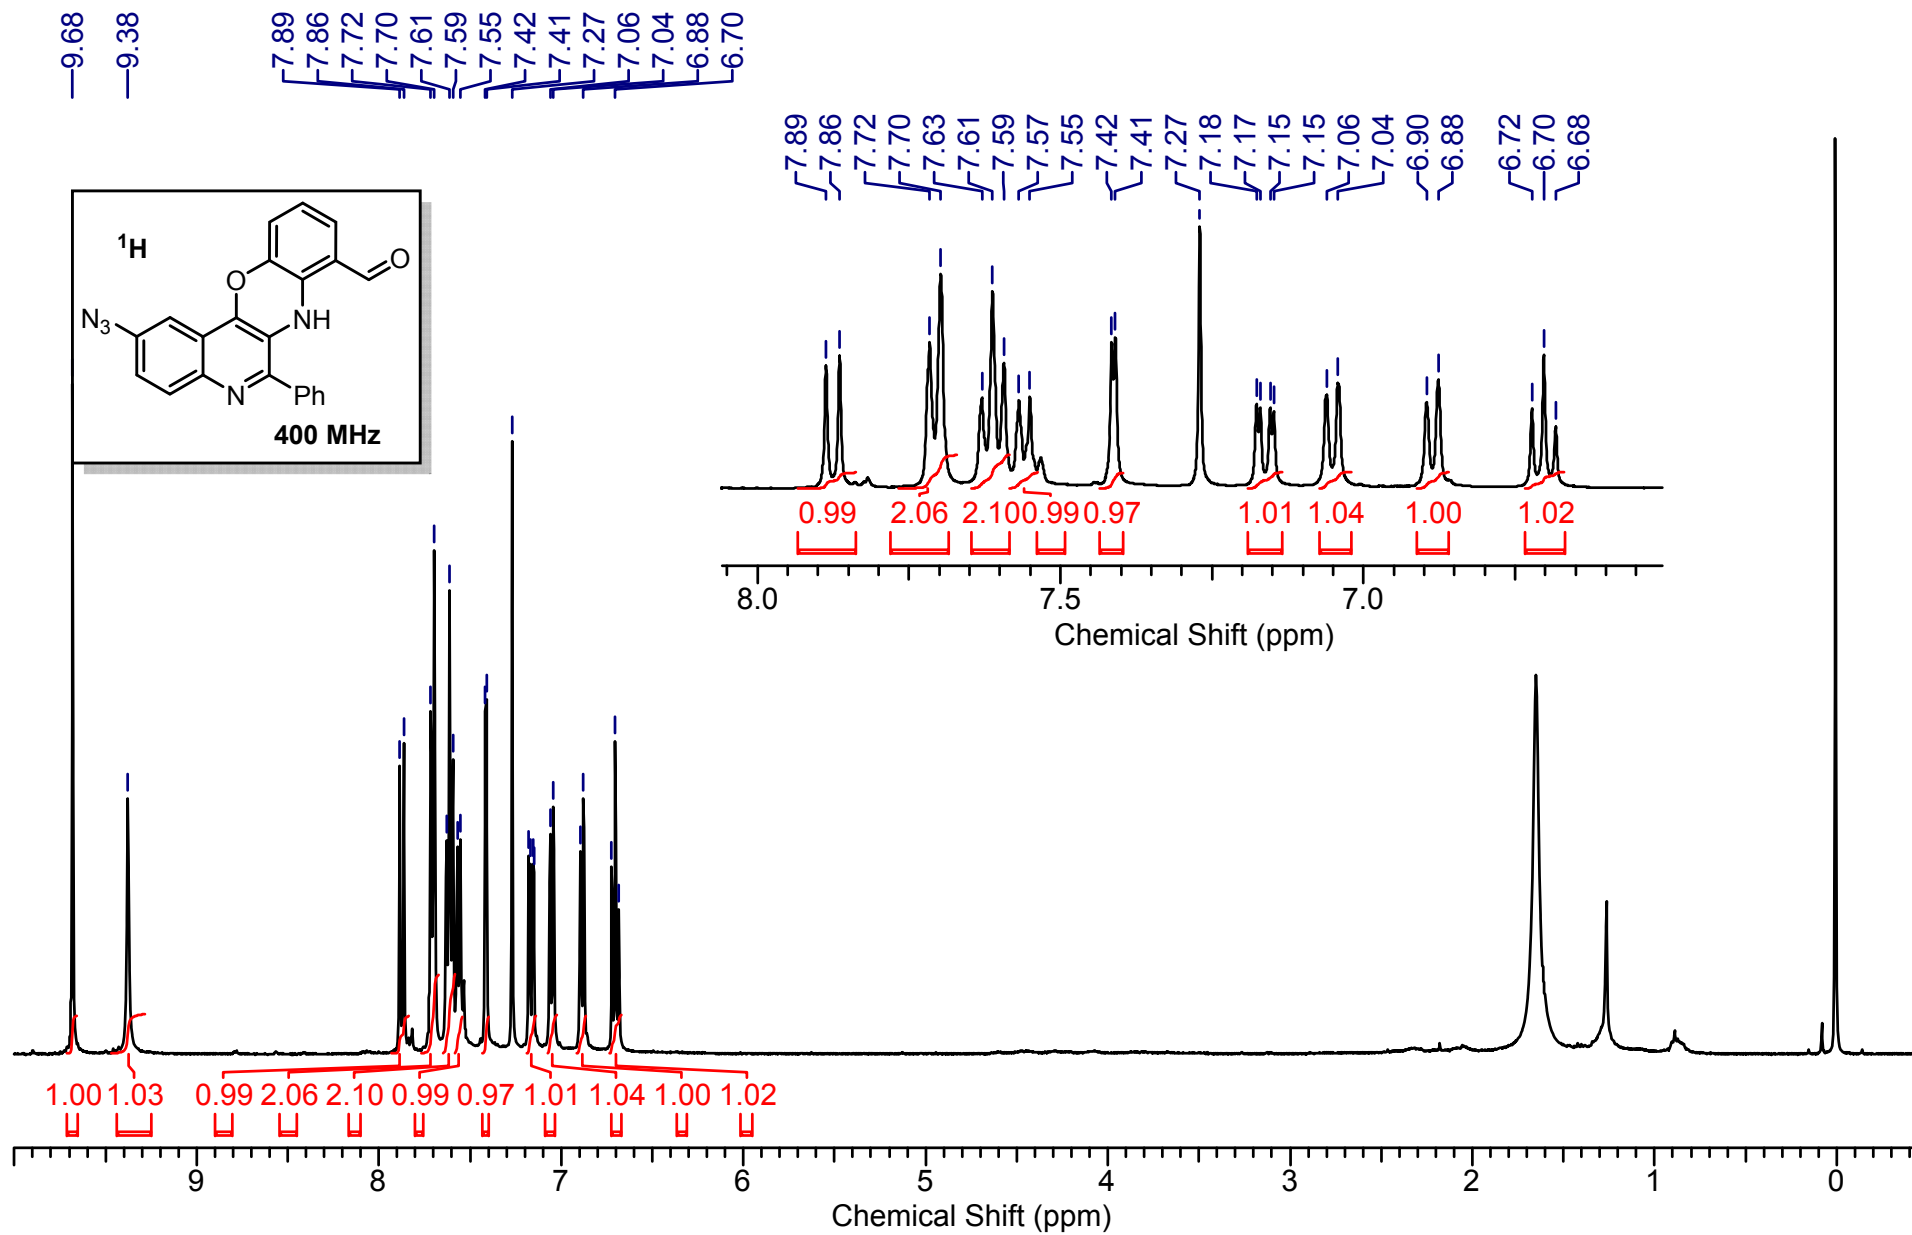

# 3ea

193.25

147.58  
143.41  
143.29  
138.42  
136.05  
135.52  
131.29  
129.66  
129.38  
129.25  
128.26  
120.94  
120.32  
119.82  
119.02  
107.52

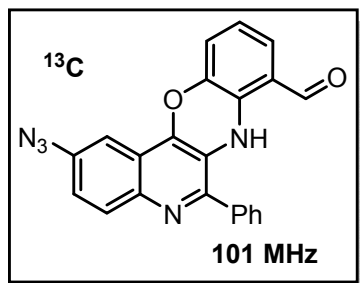

77.32  
77.00  
76.68

131.29  
129.66  
129.38  
129.25  
128.26

120.94  
120.87  
120.32  
119.82  
119.02  
118.80

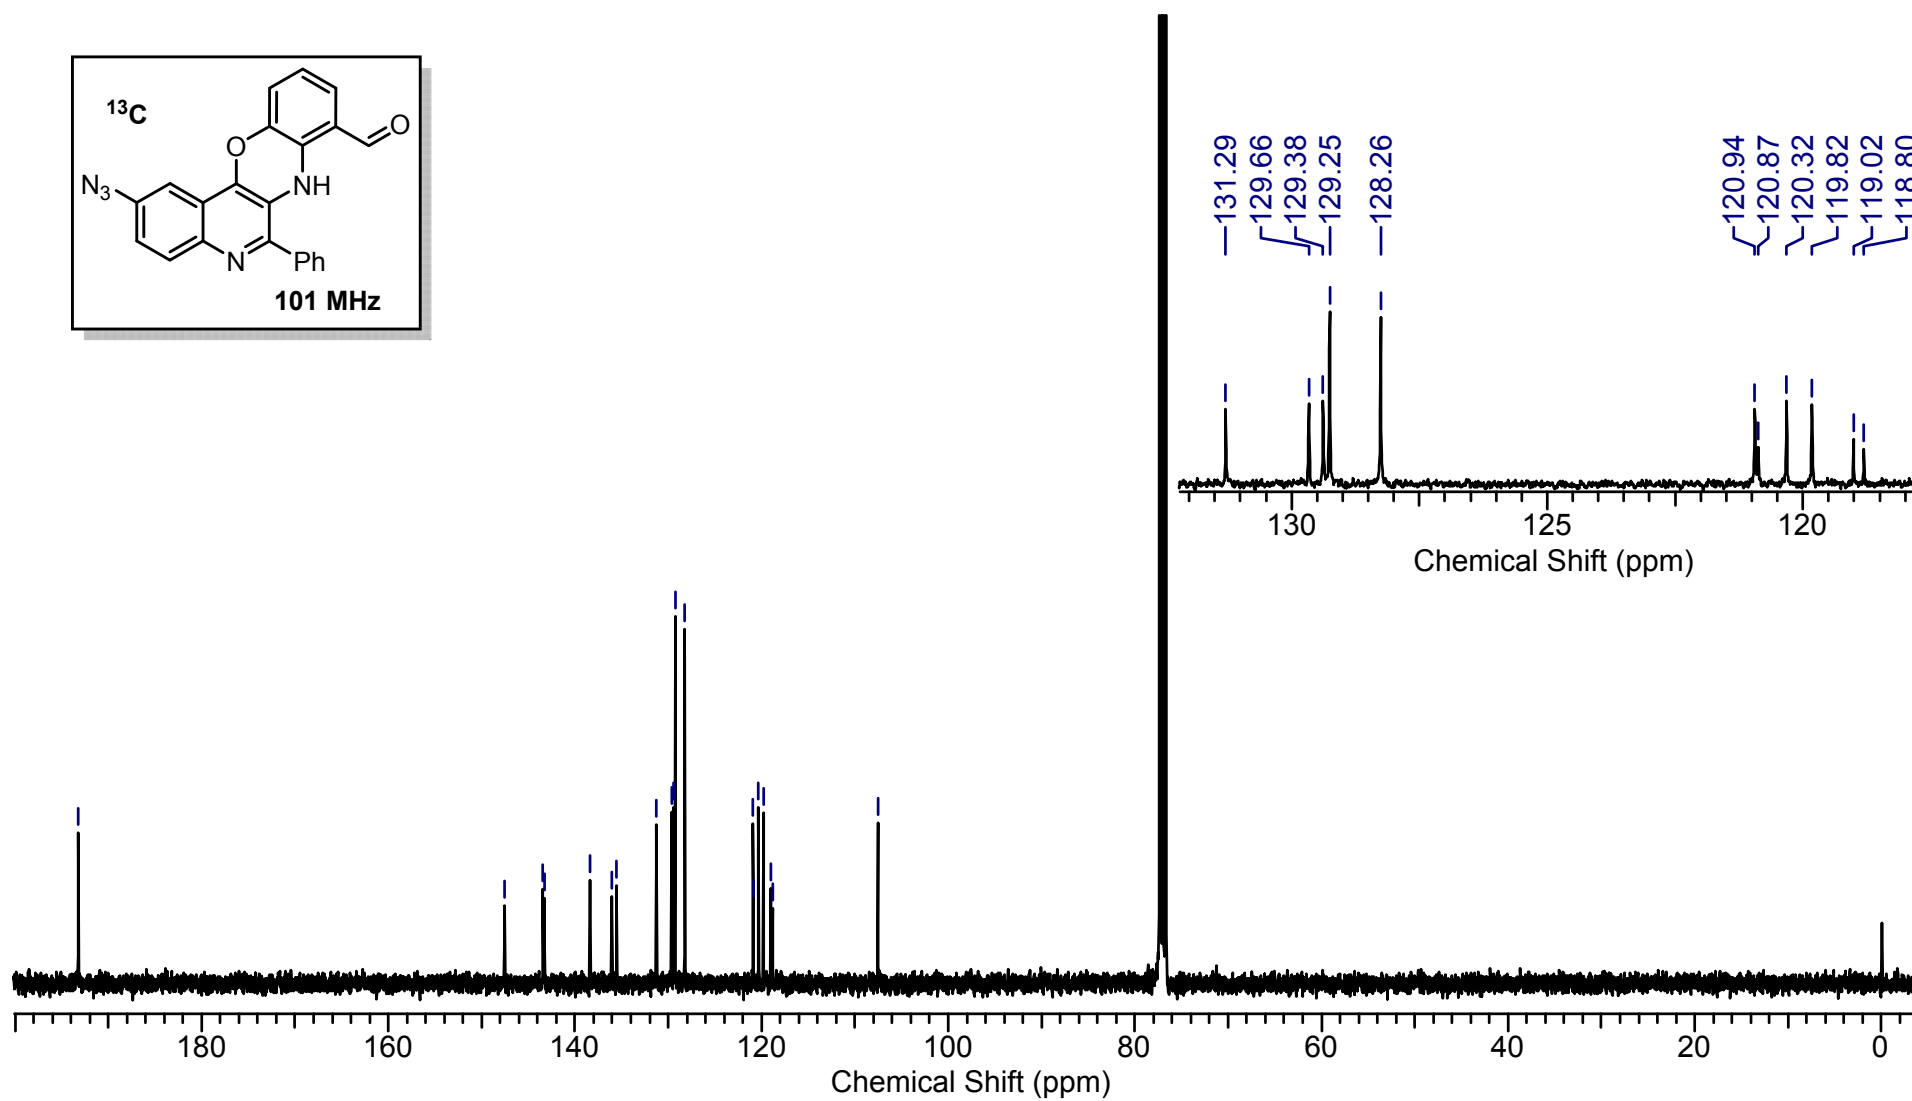

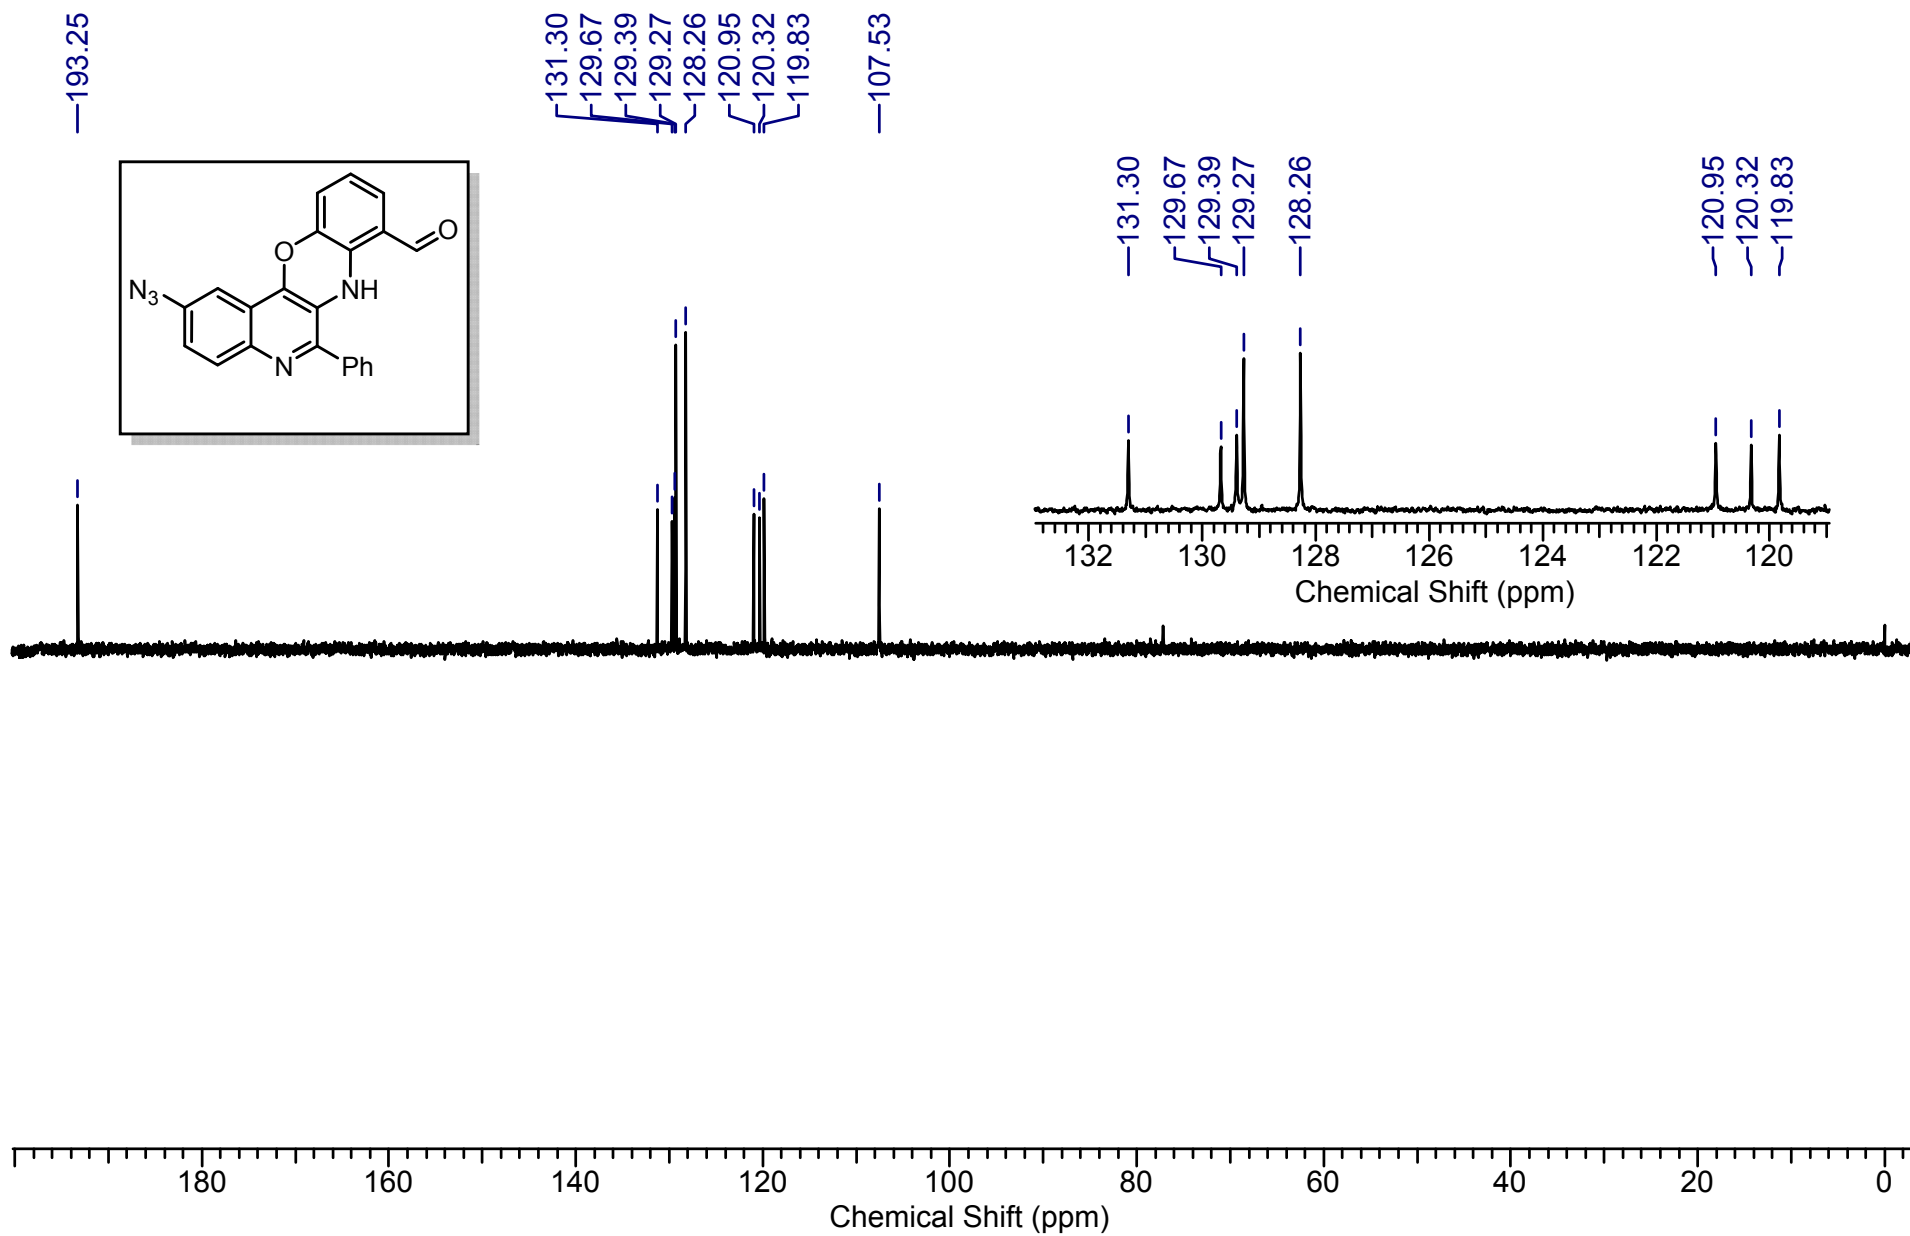

# 3ea

SVH-680 #796 RT: 3.55 AV: 1 NL: 1.01E8  
T: FTMS + p ESI Full ms [100.0000-1500.0000]

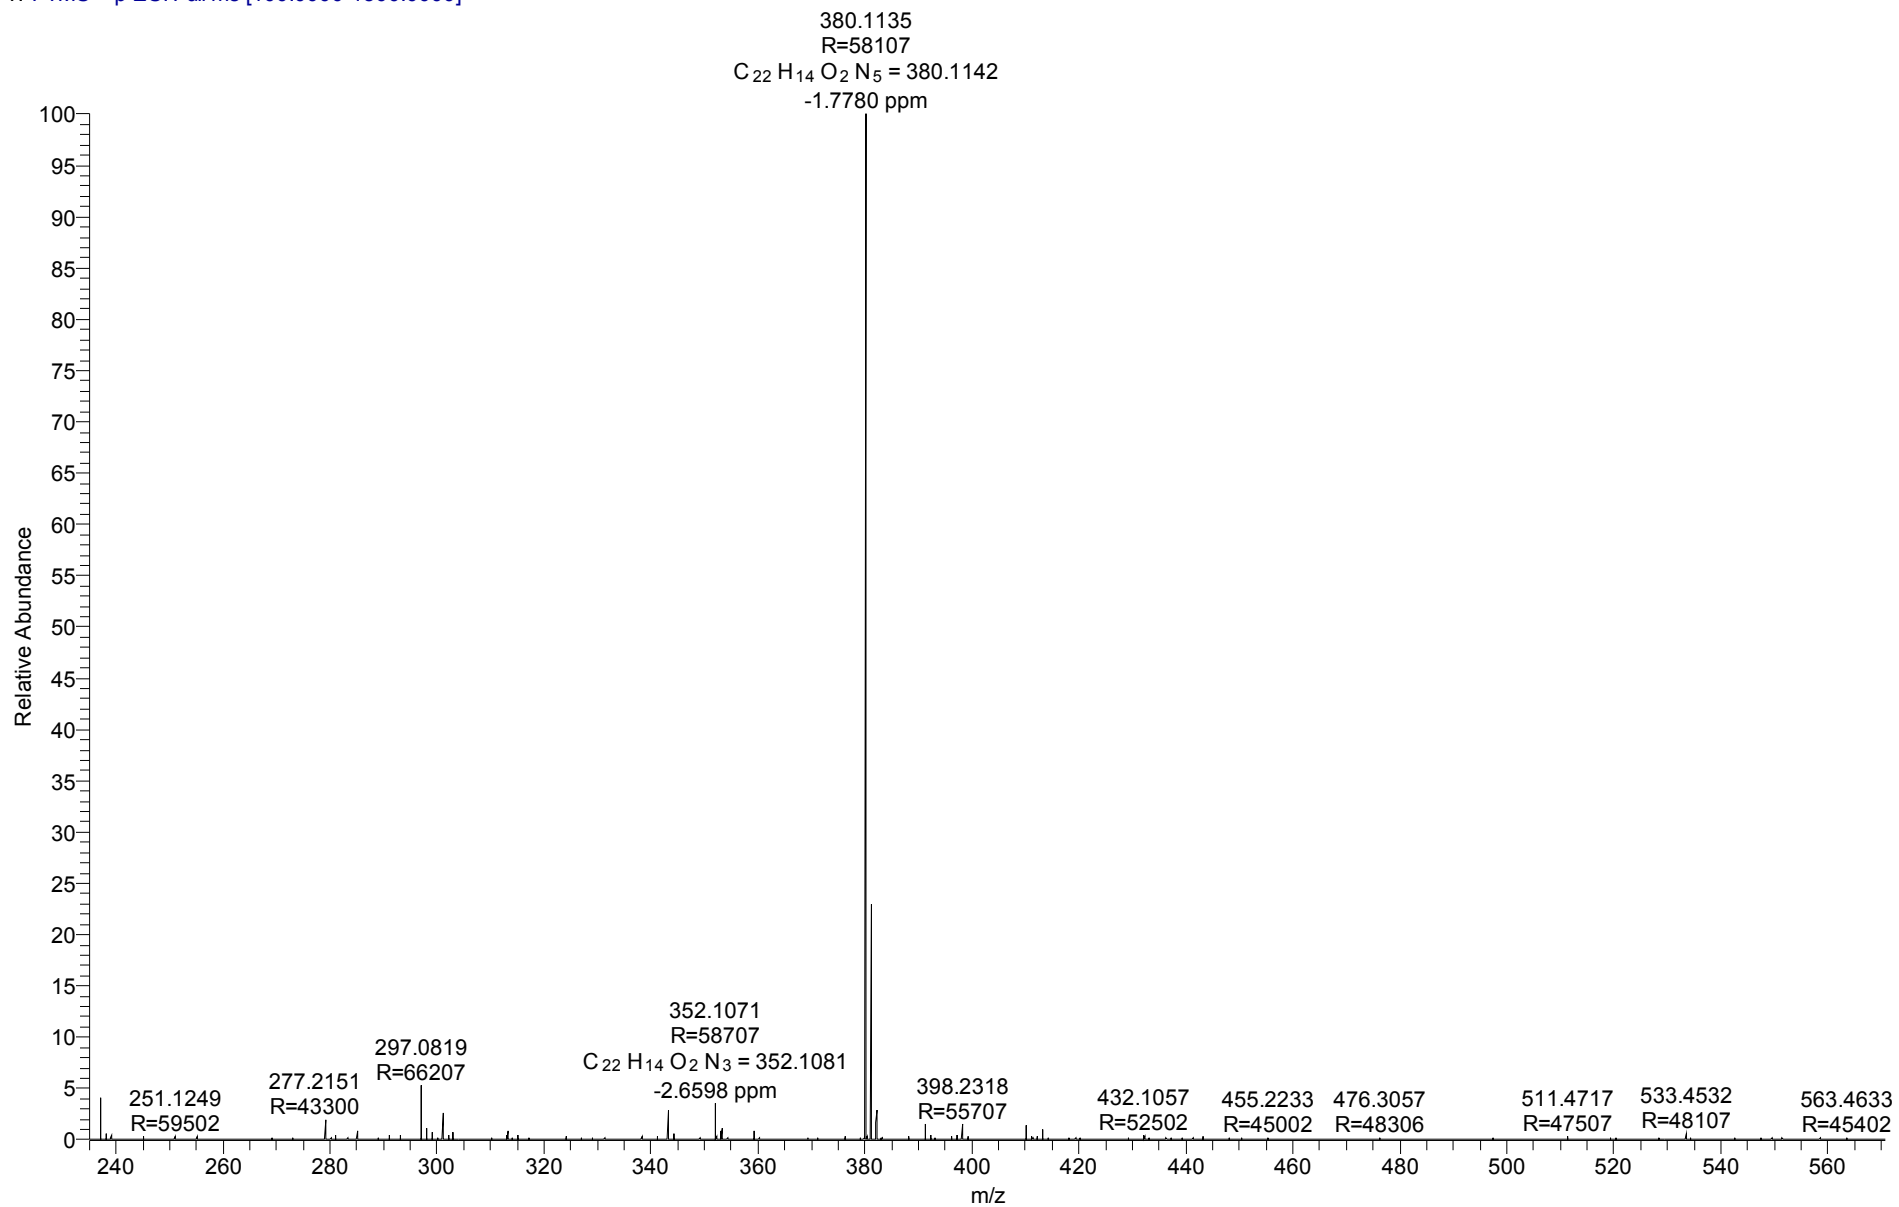



# 3ab

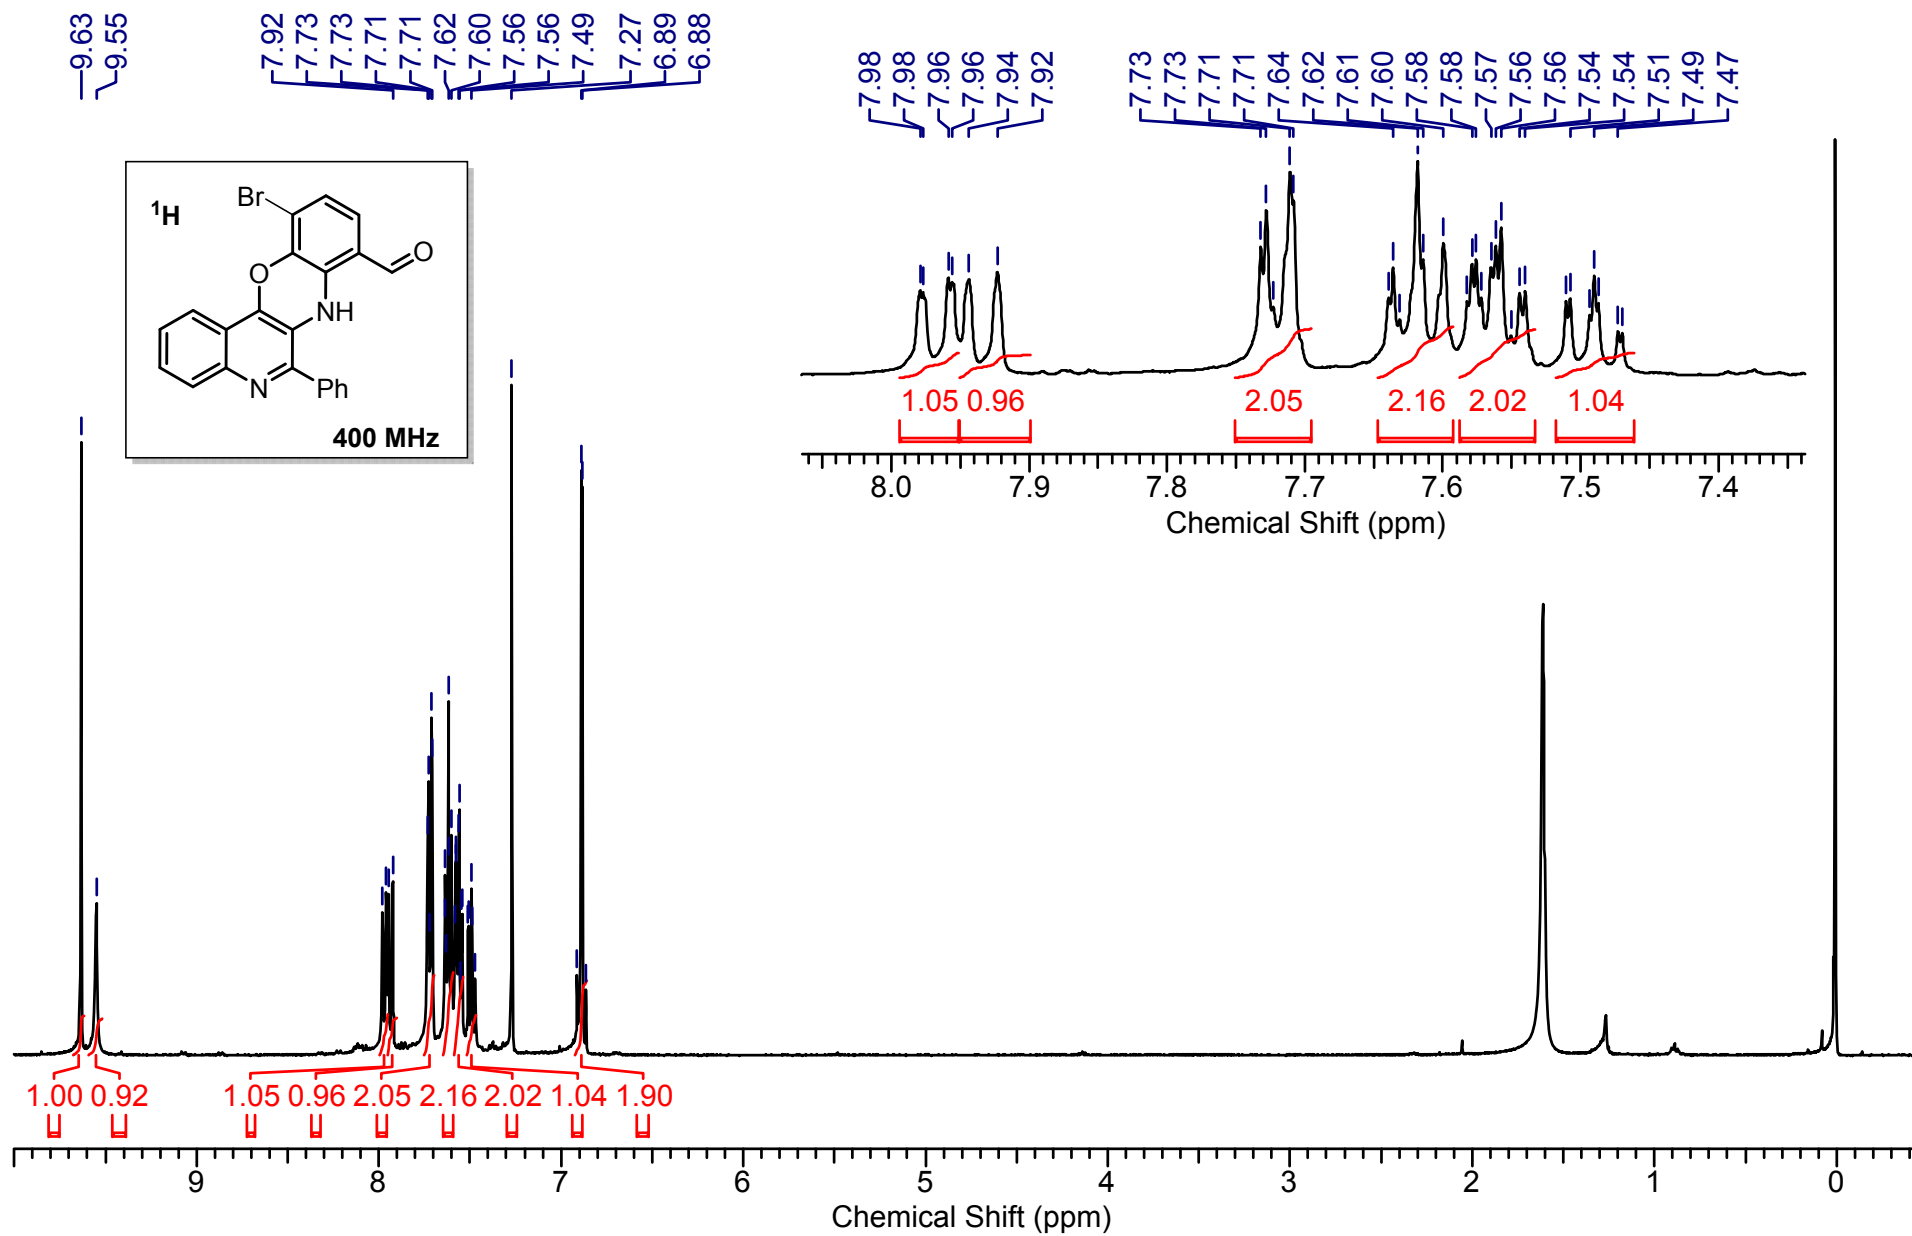

# 3ab

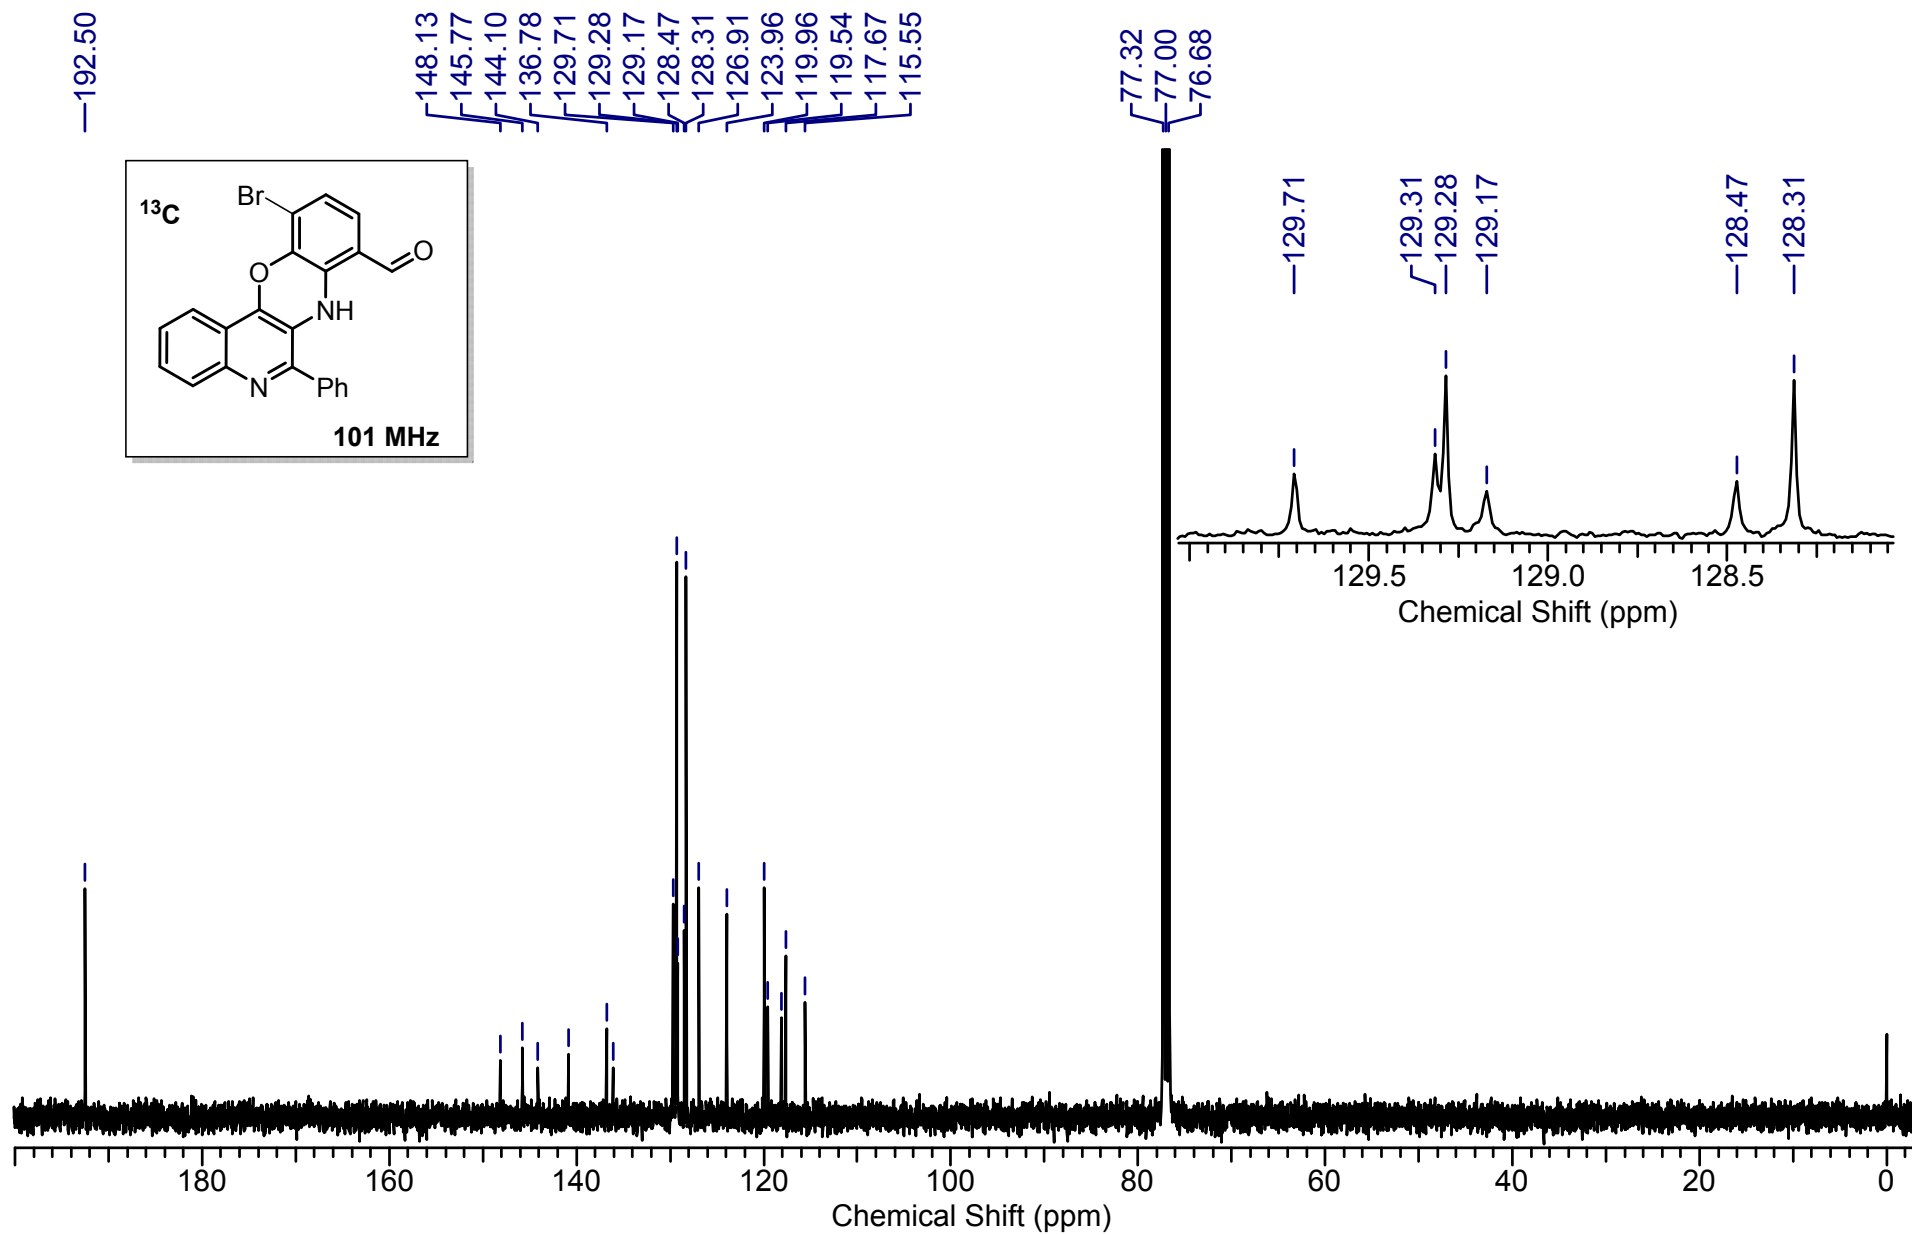

# 3ab

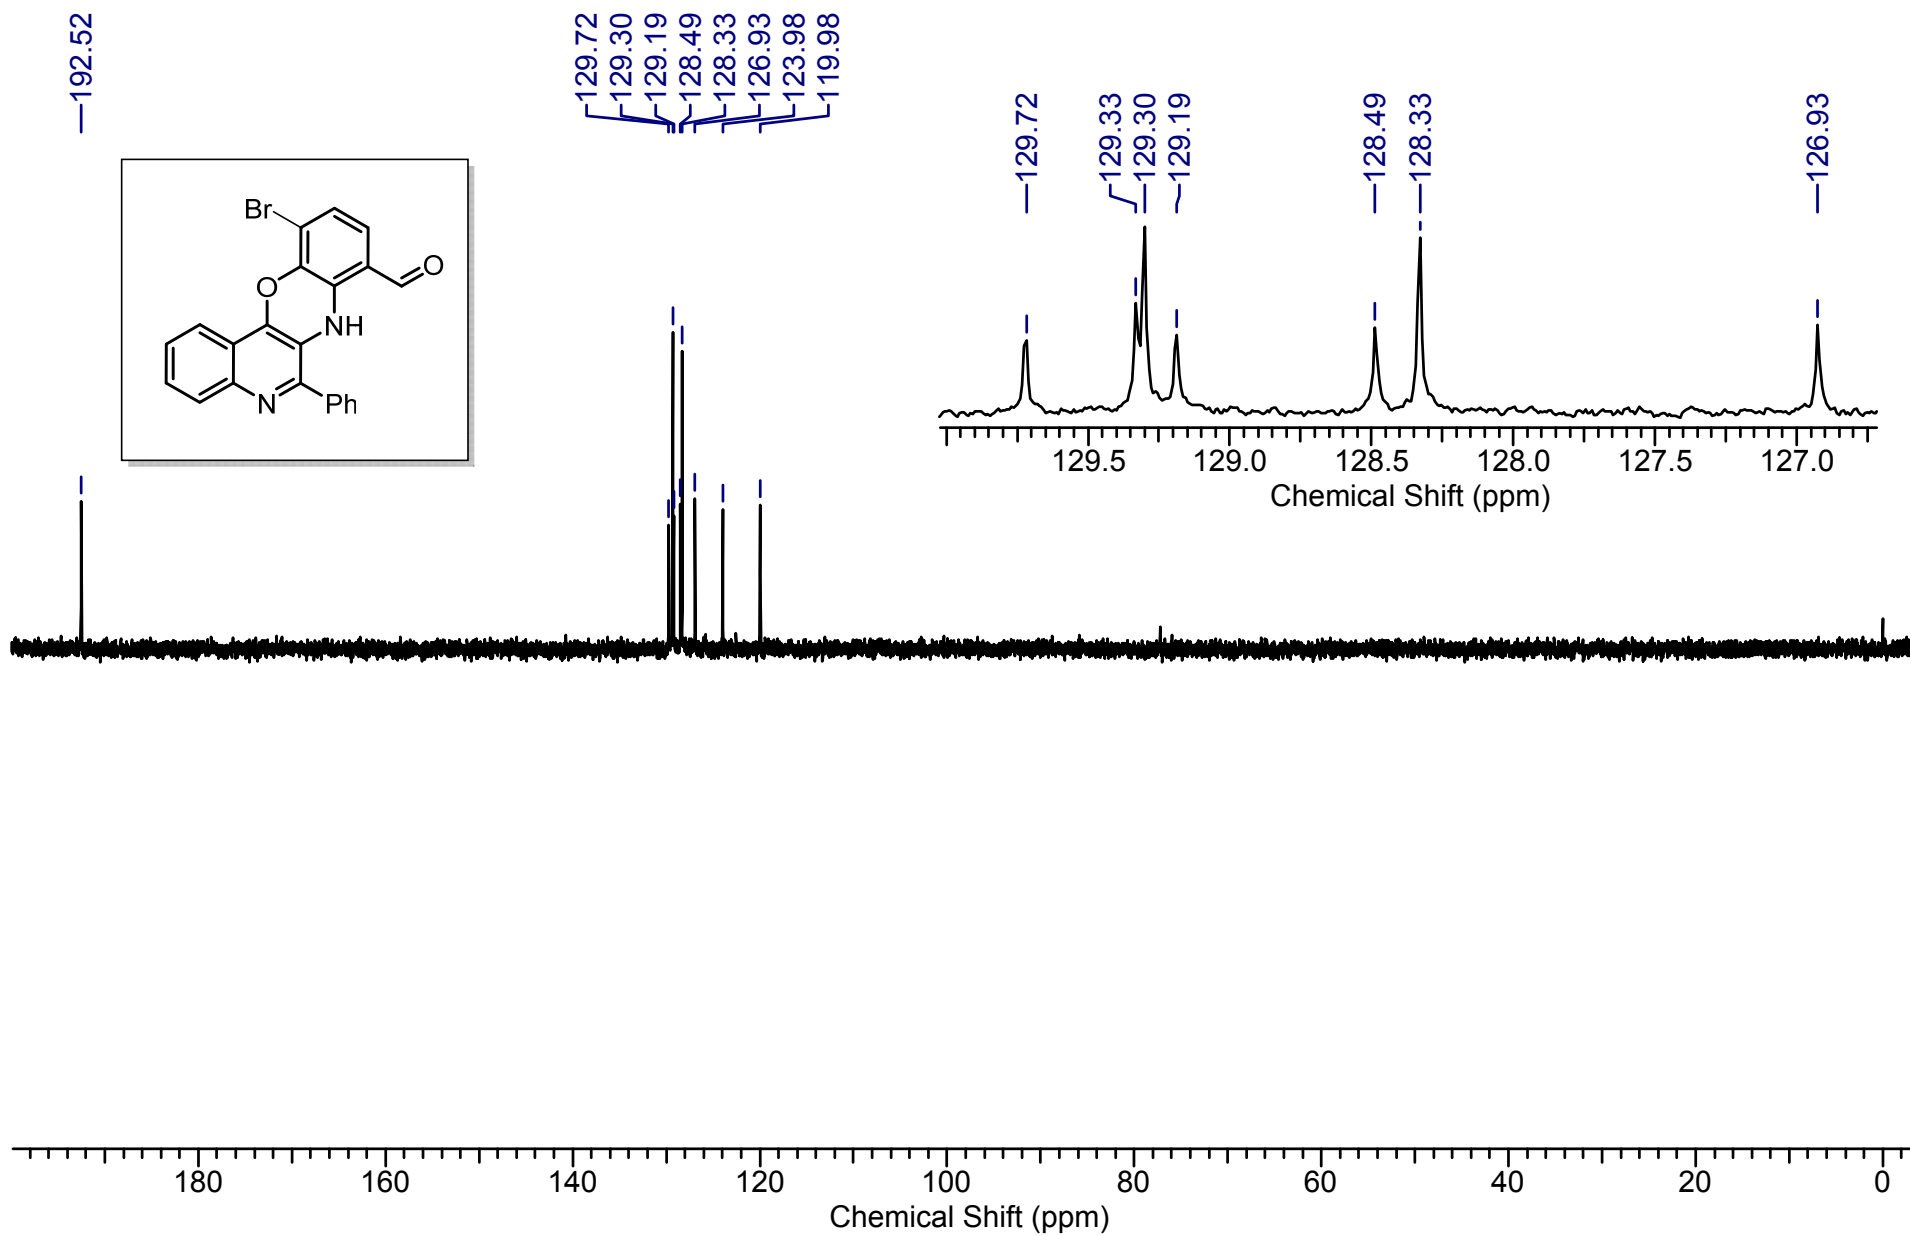

# 3ab

SH-608 #494 RT: 2.63 AV: 1 NL: 2.72E7  
T: FTMS + p ESI Full ms [100.0000-1500.0000]

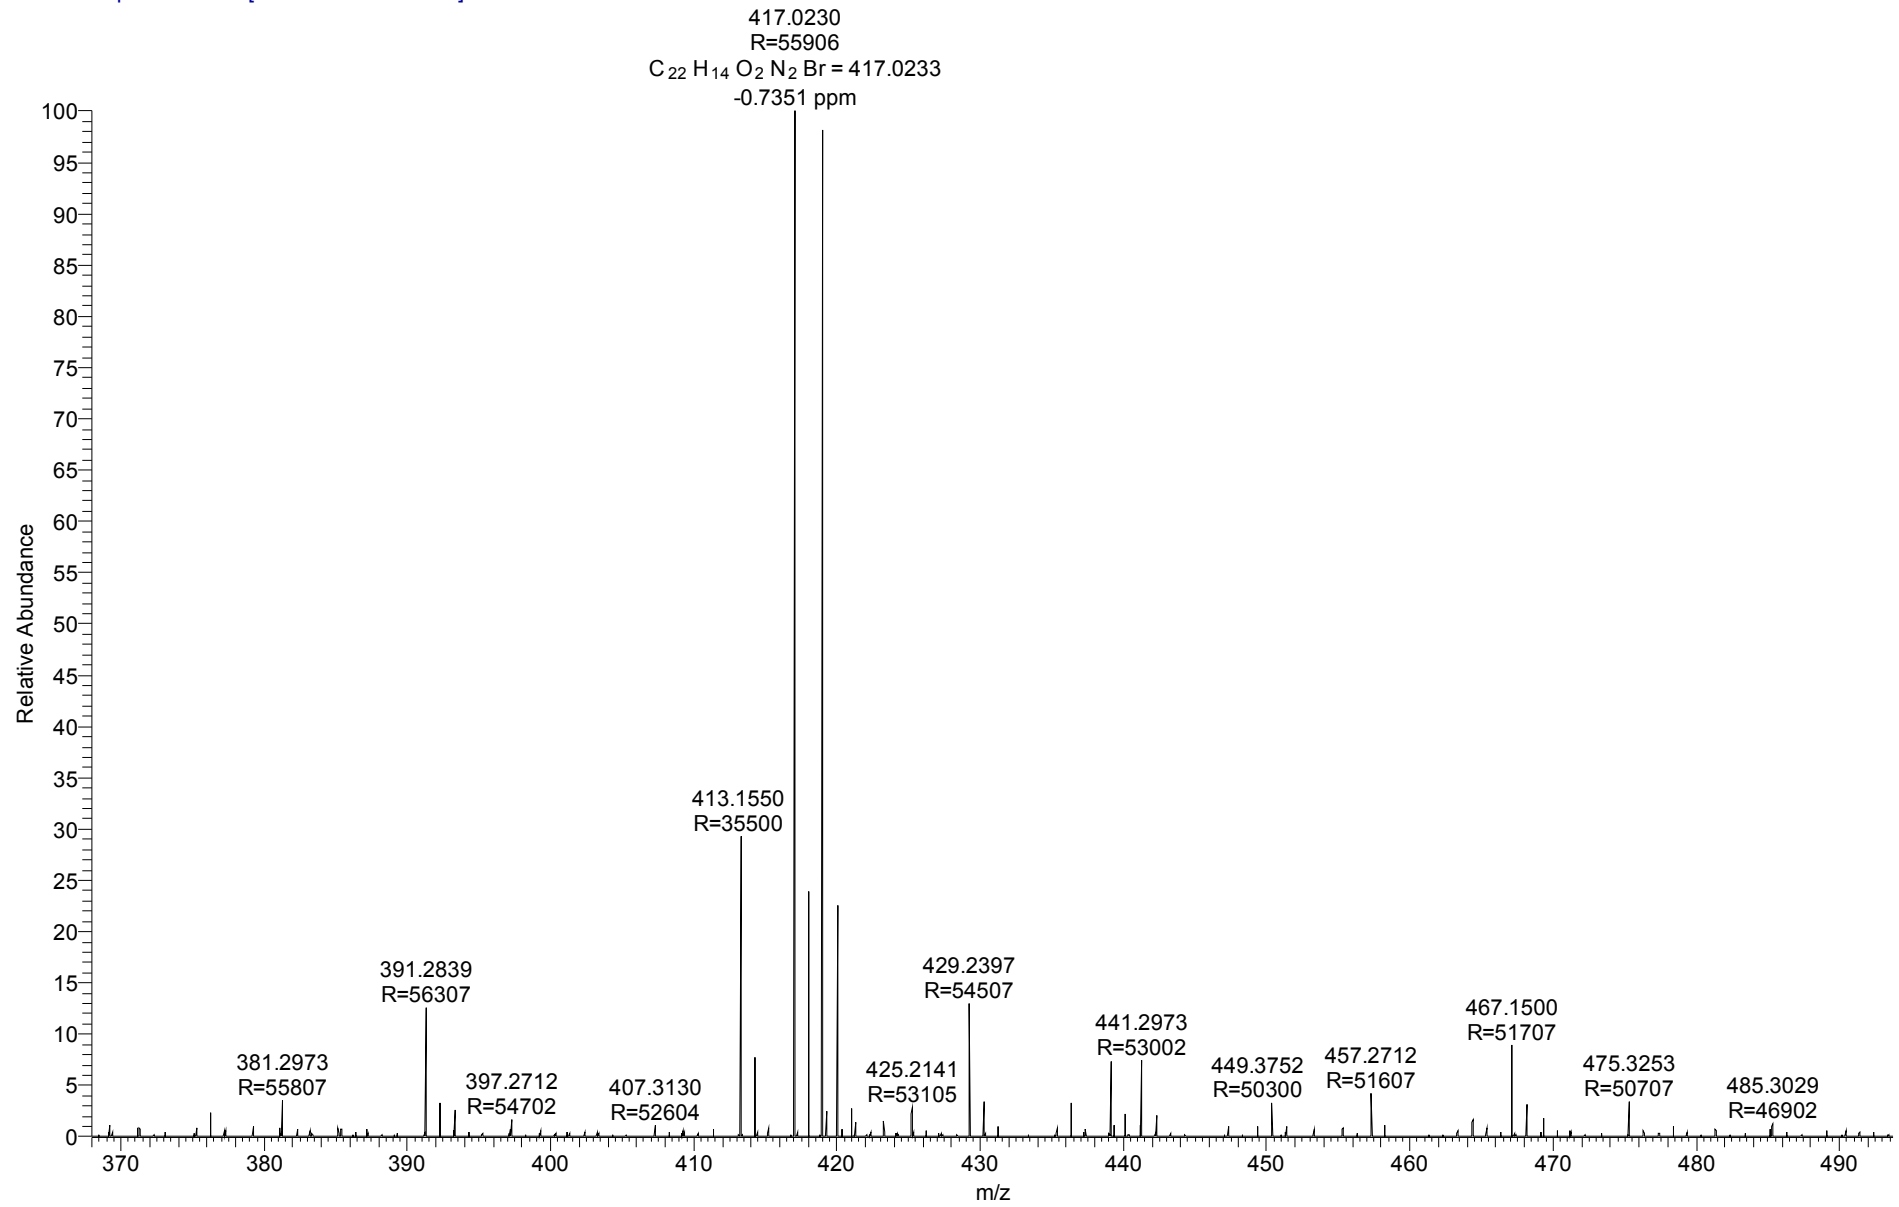

# 3ac

9.61  
9.54  
7.93  
7.91  
7.72  
7.71  
7.62  
7.60  
7.57  
7.56  
7.55  
7.27  
6.95  
6.93  
6.71  
6.69

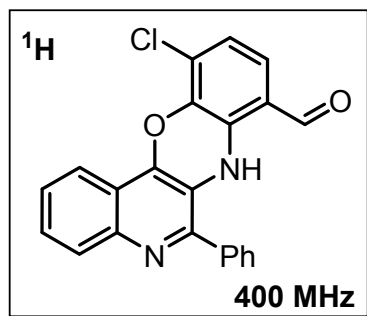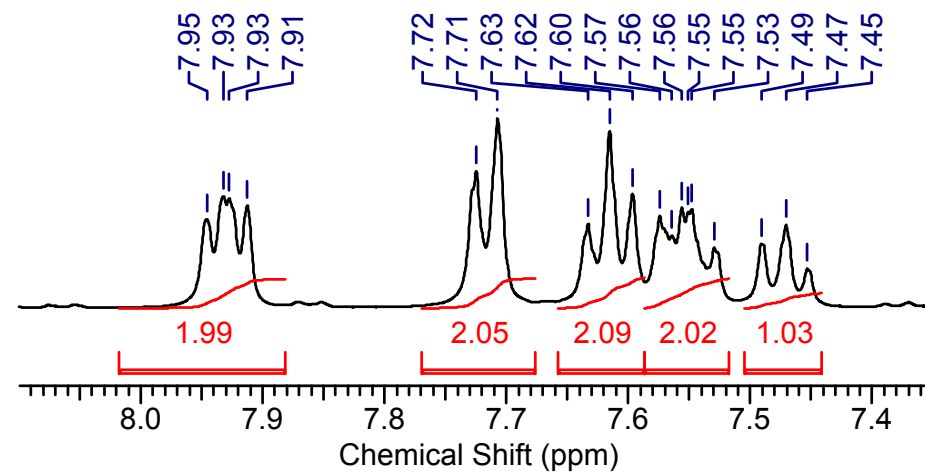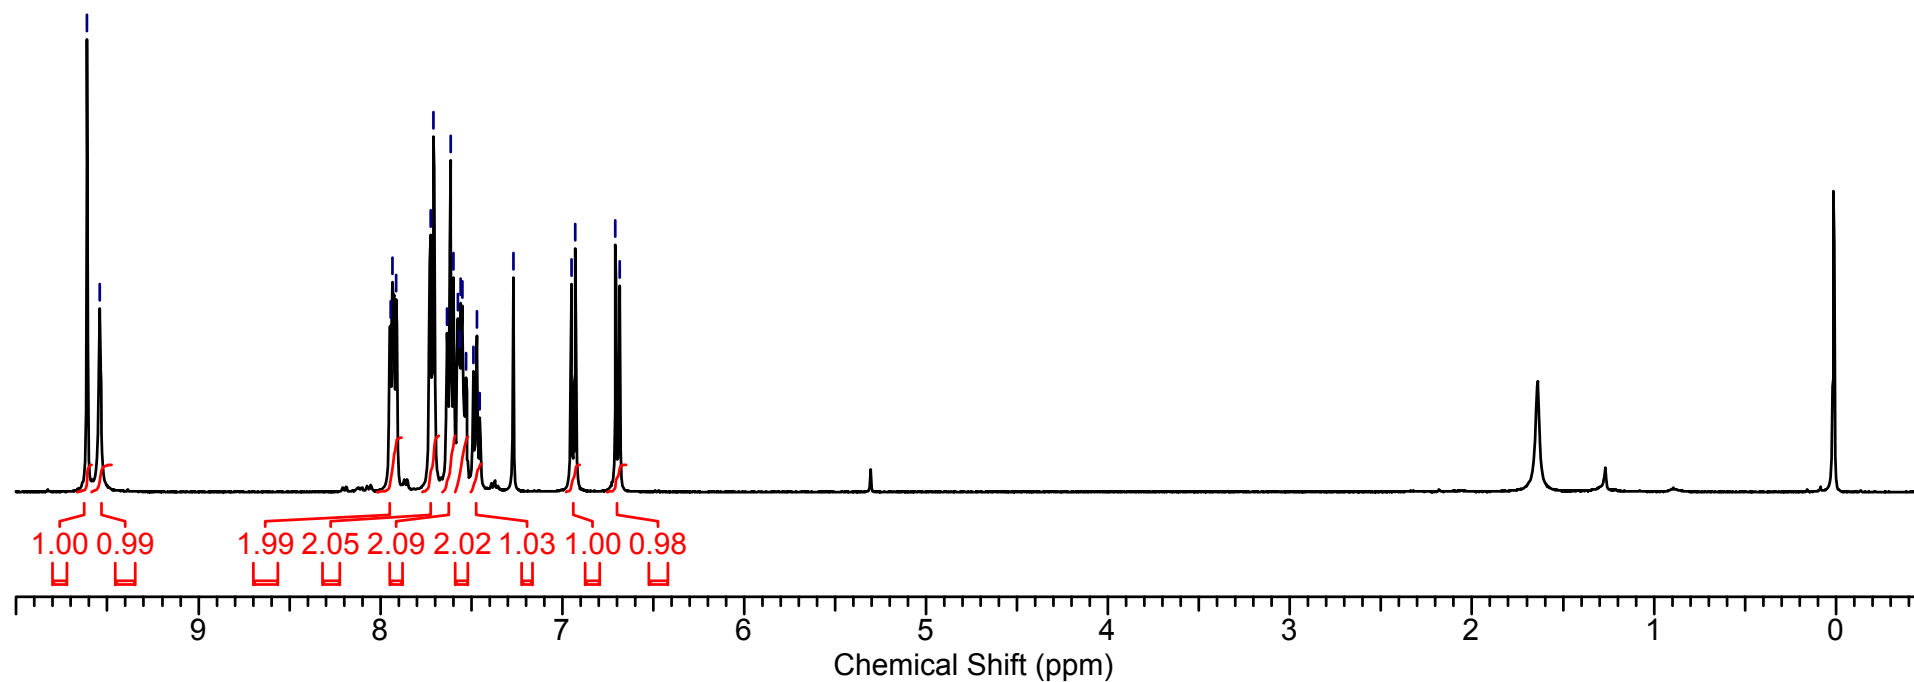

# 3ac

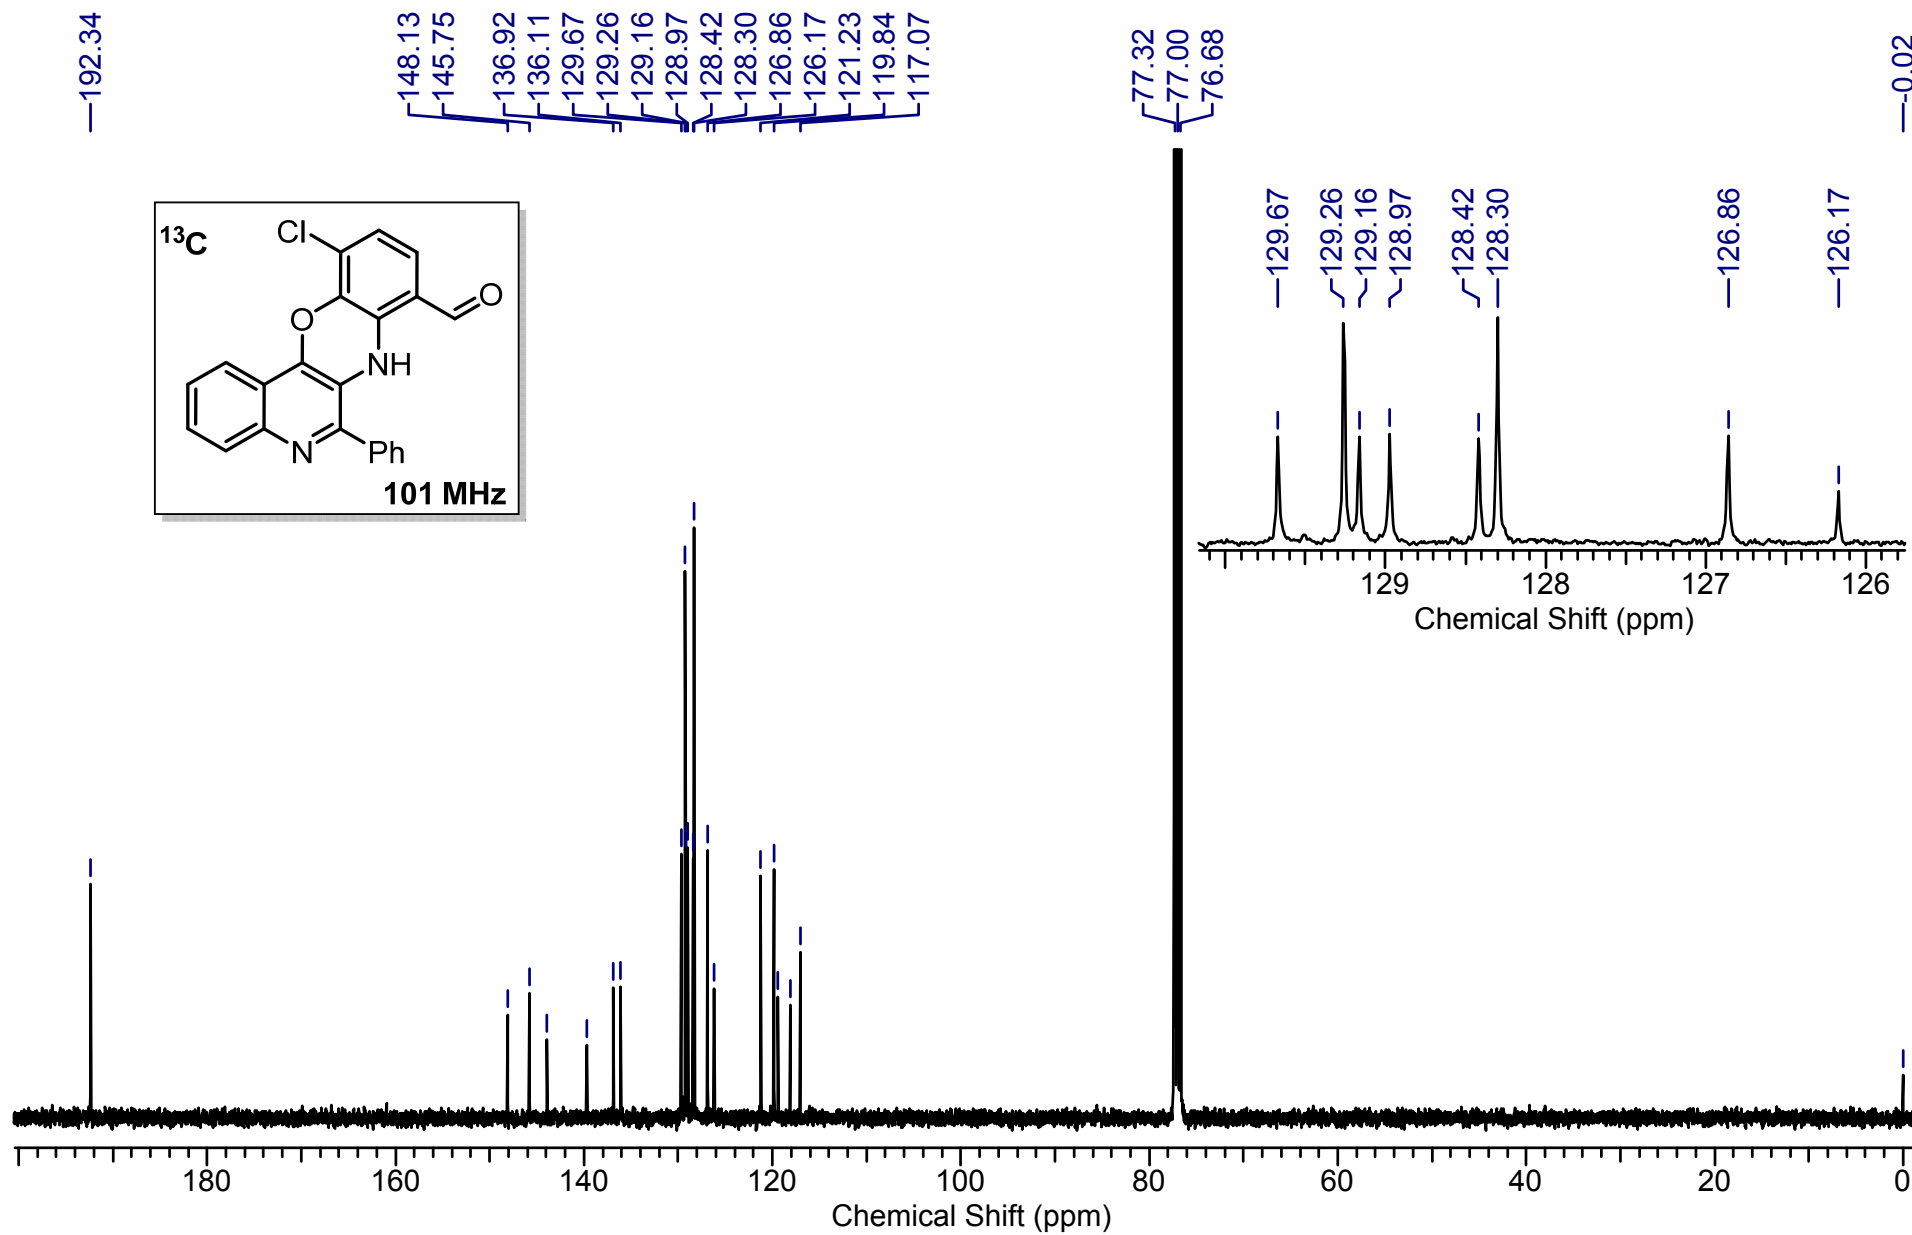

**3ac**

—192.34

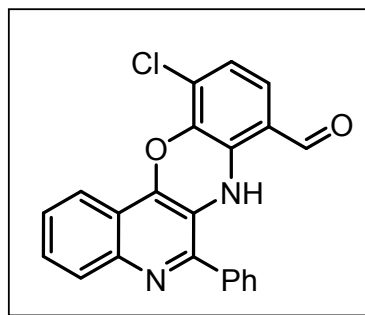

—129.67  
—129.26  
—129.16  
—128.97  
—128.42  
—128.30  
—126.86  
—121.23  
—119.83

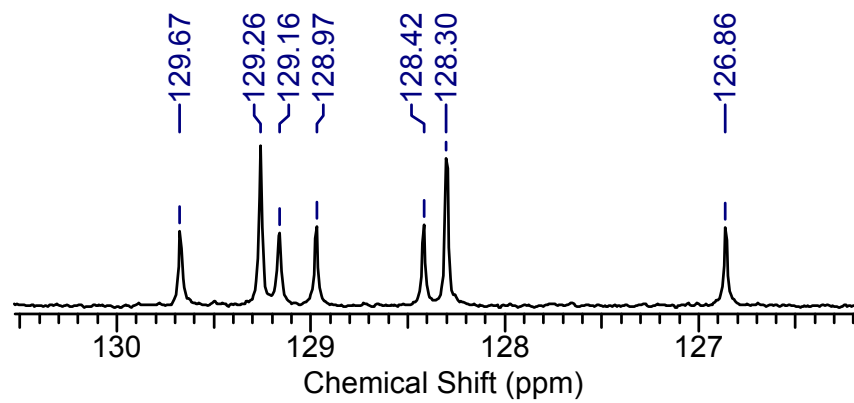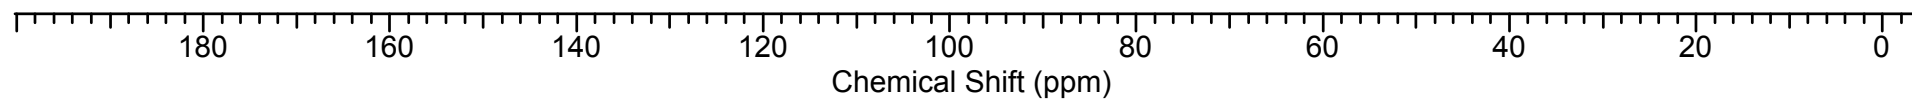

# 3ac

SH-609 #477 RT: 2.52 AV: 1 NL: 4.20E7  
T: FTMS + p ESI Full ms [100.0000-1500.0000]

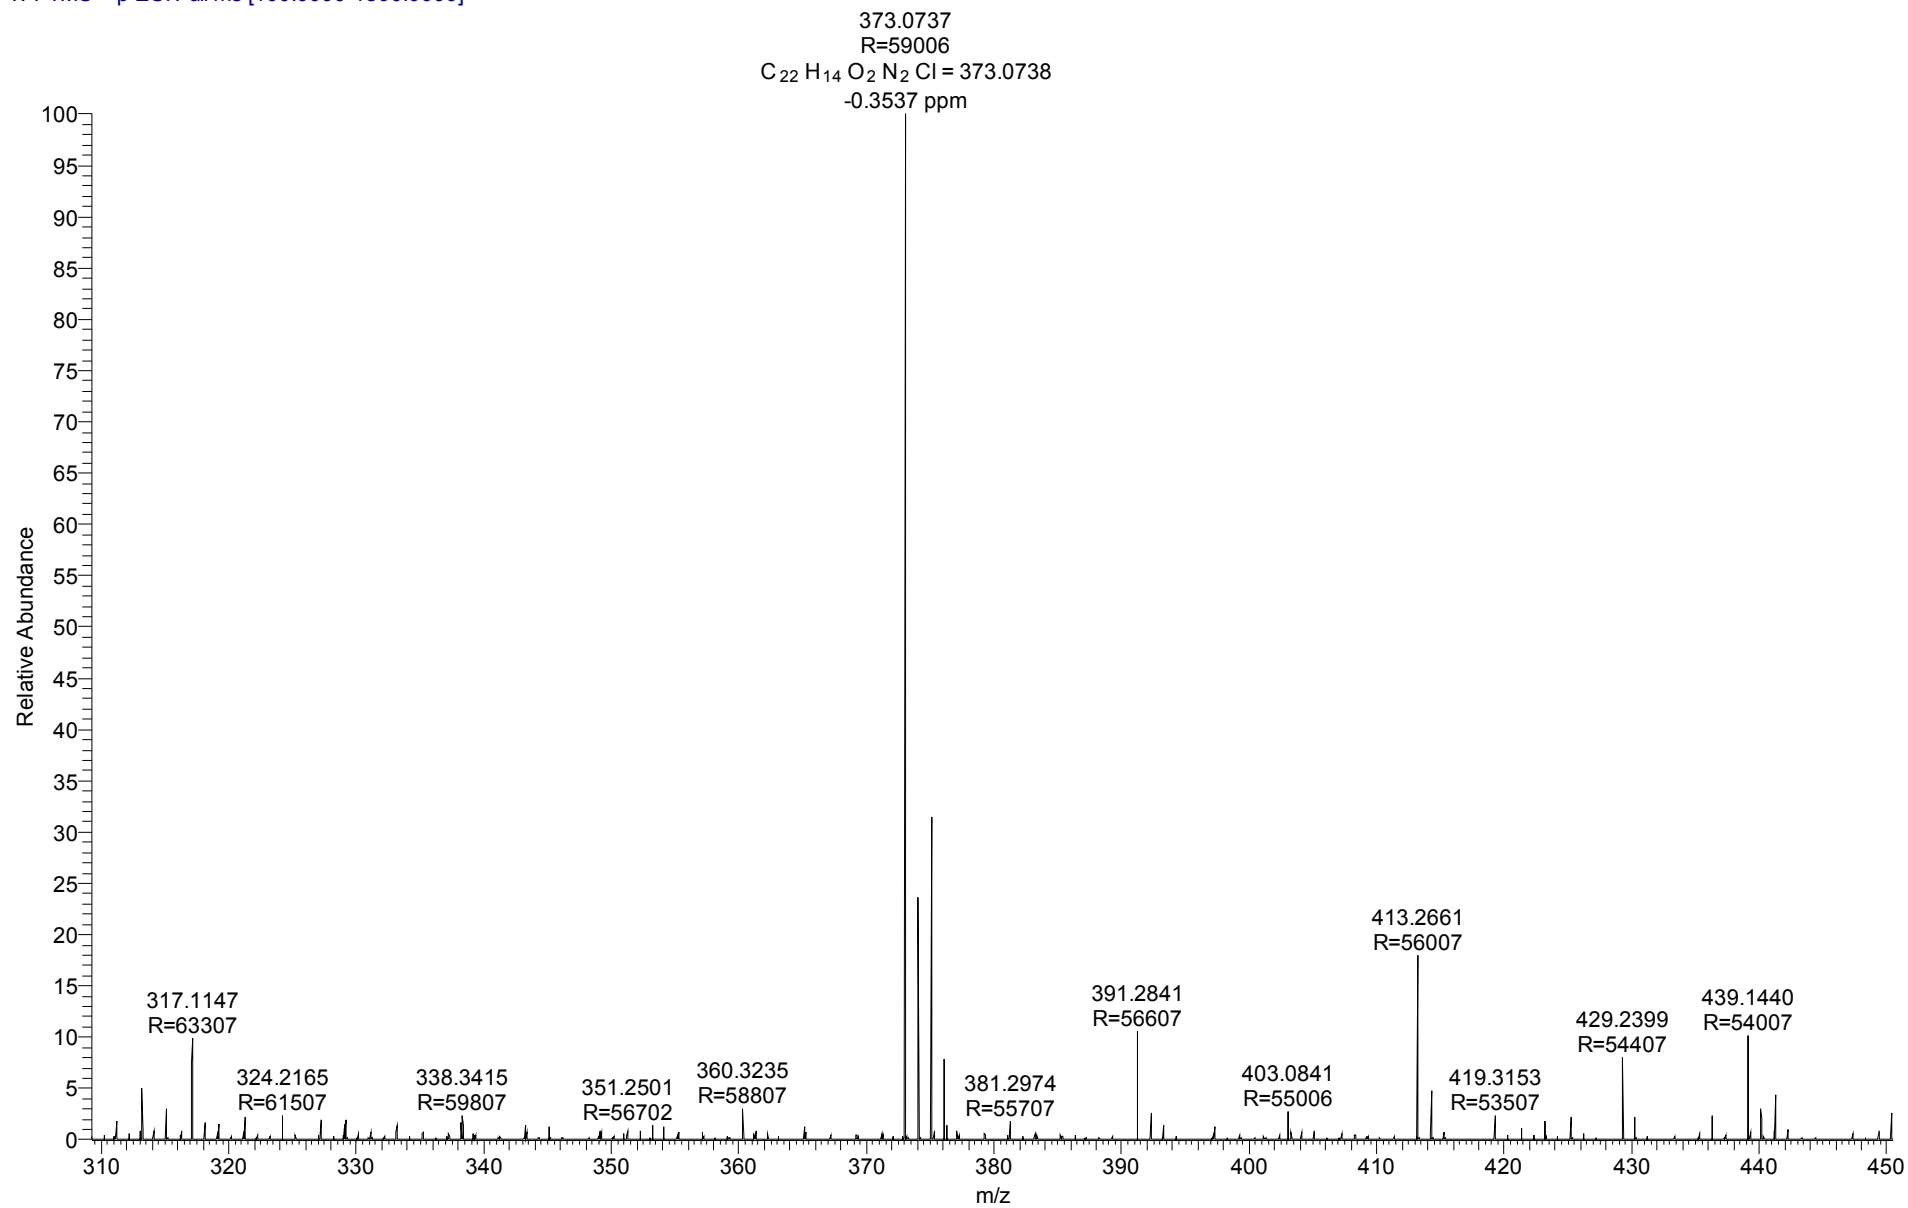



# 3ad

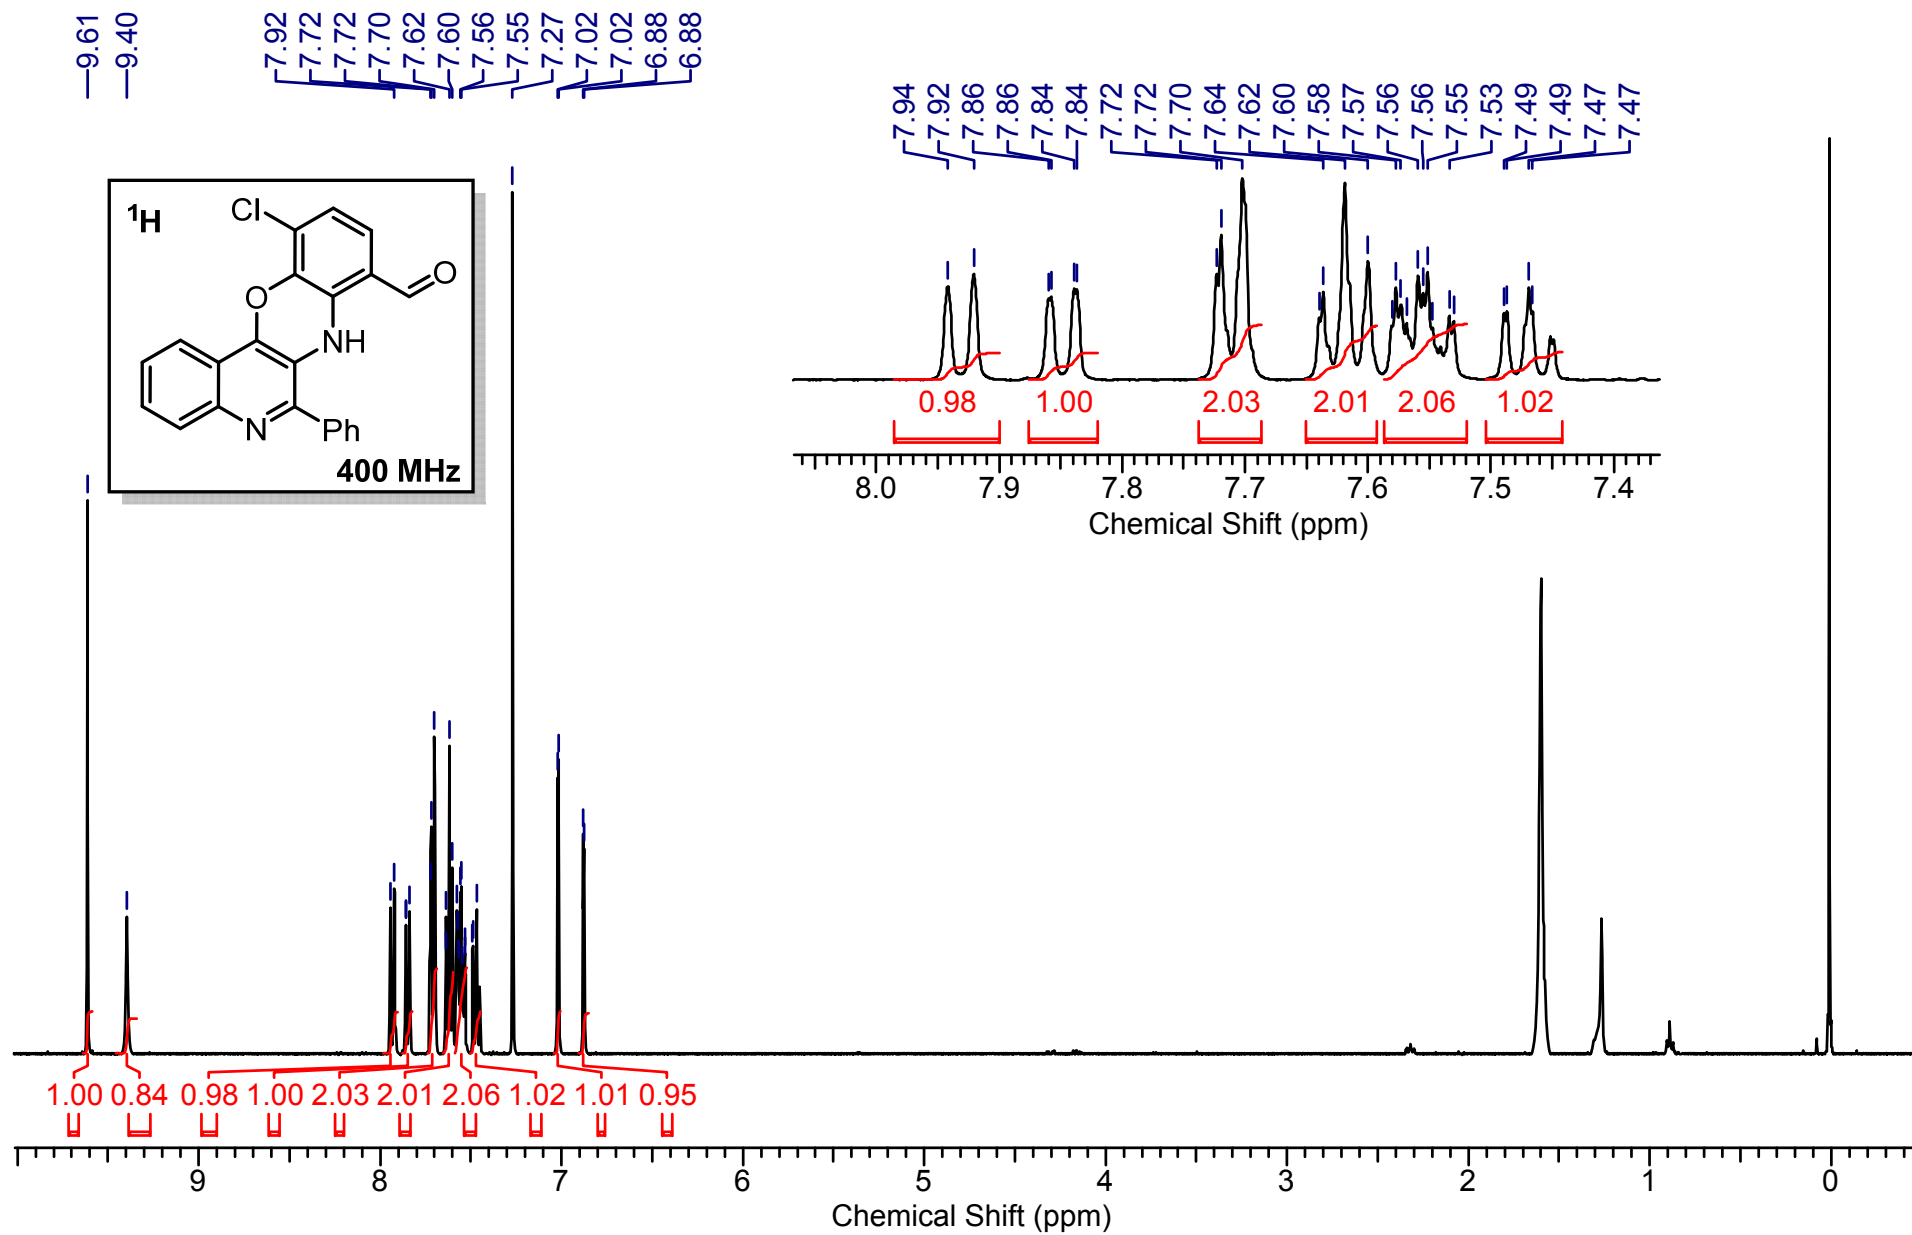

# 3ad

192.02

148.28  
145.69  
144.36  
143.94  
136.10  
129.70  
129.31  
129.30  
128.32  
128.29  
127.77  
126.83  
120.11  
119.50  
118.87

77.32  
77.20  
77.00  
76.68

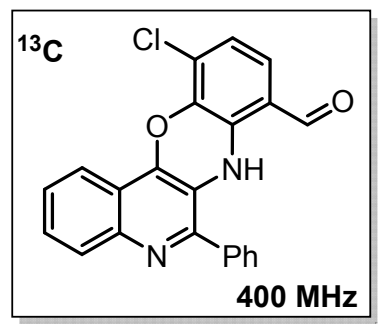

129.70  
129.31  
129.30  
128.32  
128.29  
127.77  
126.83

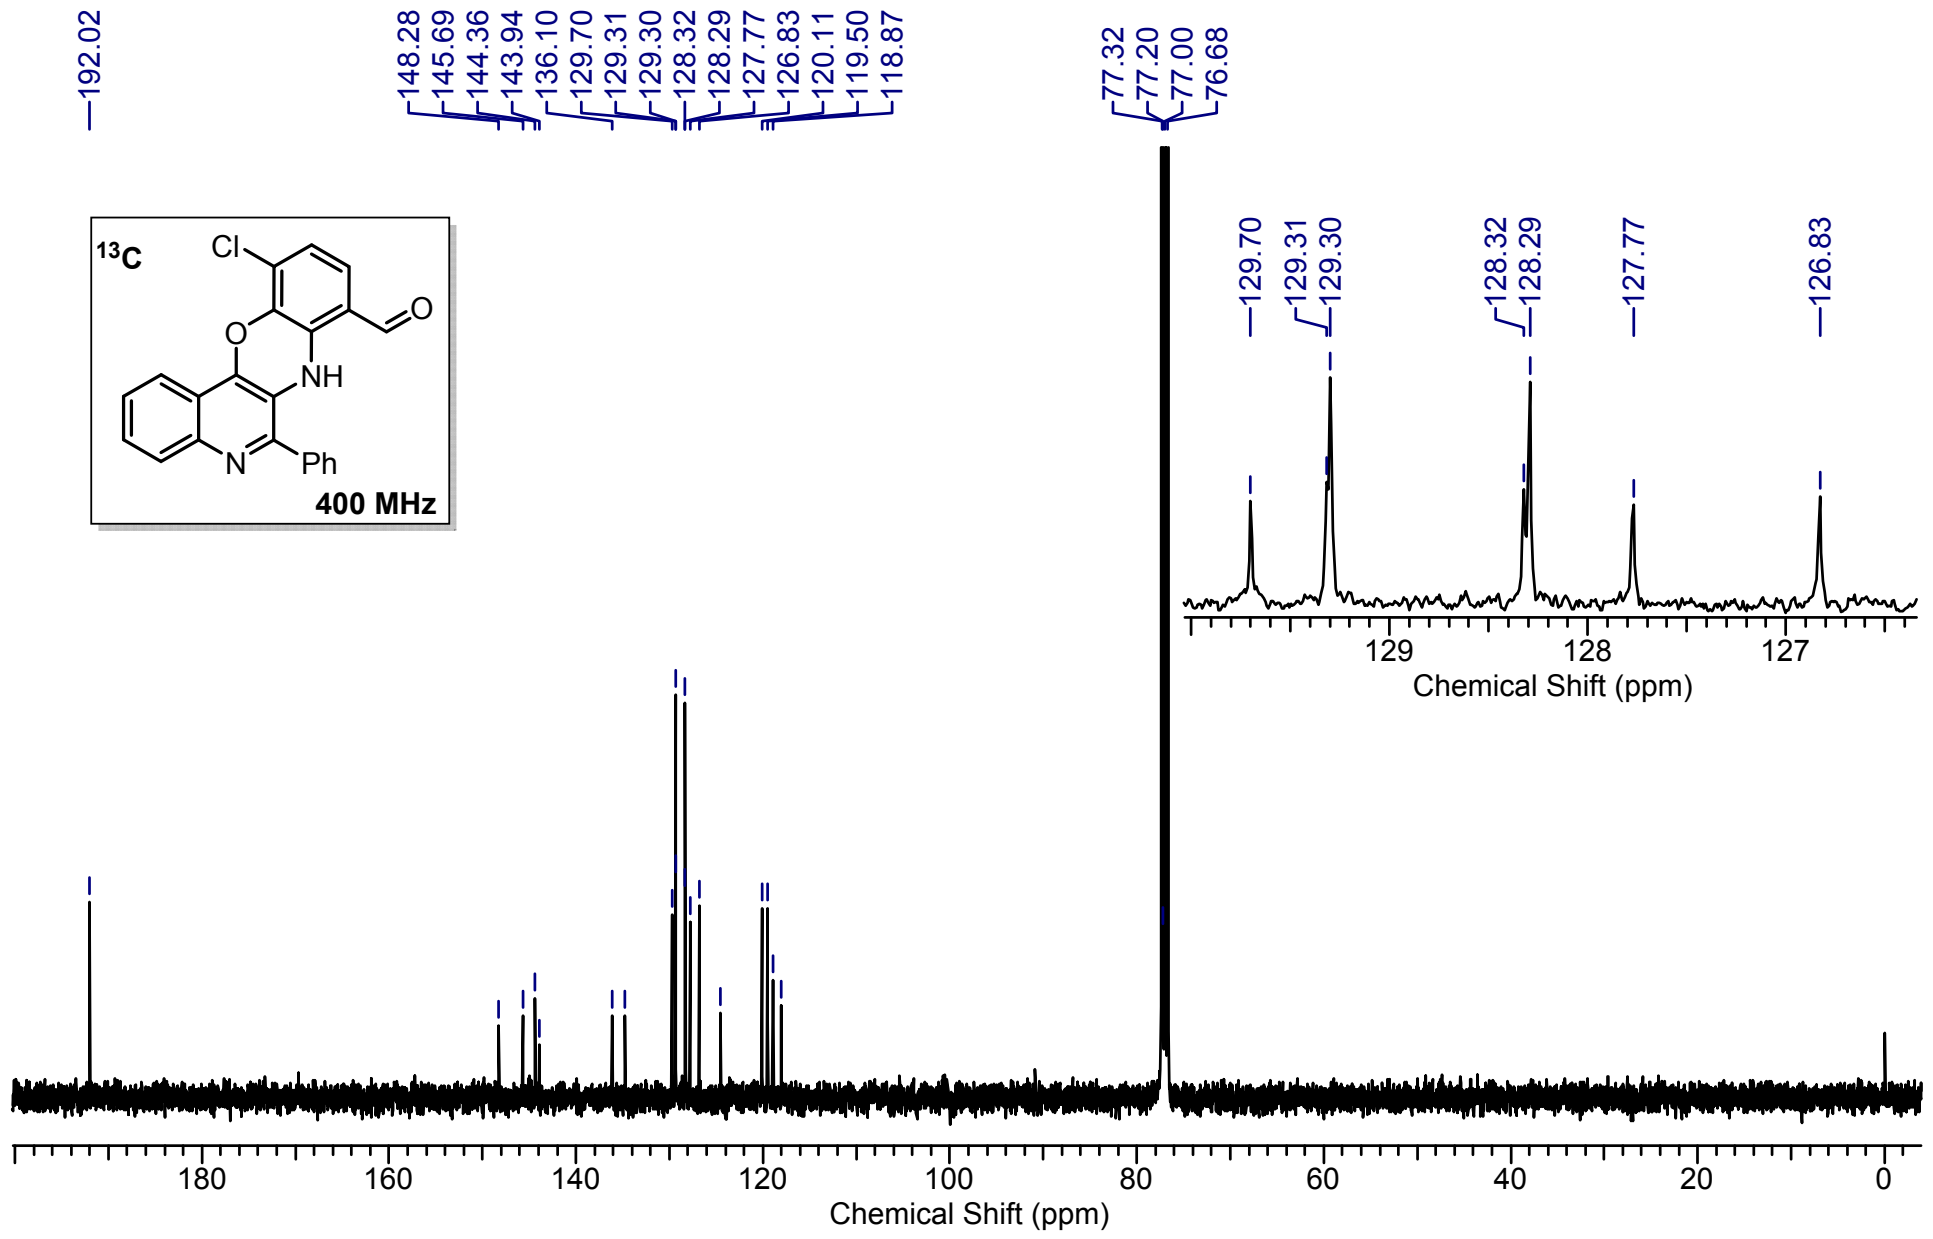

# 3ad

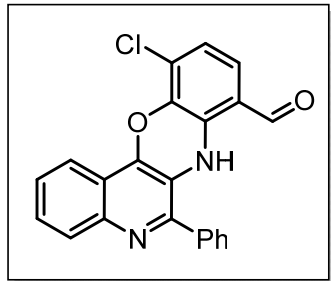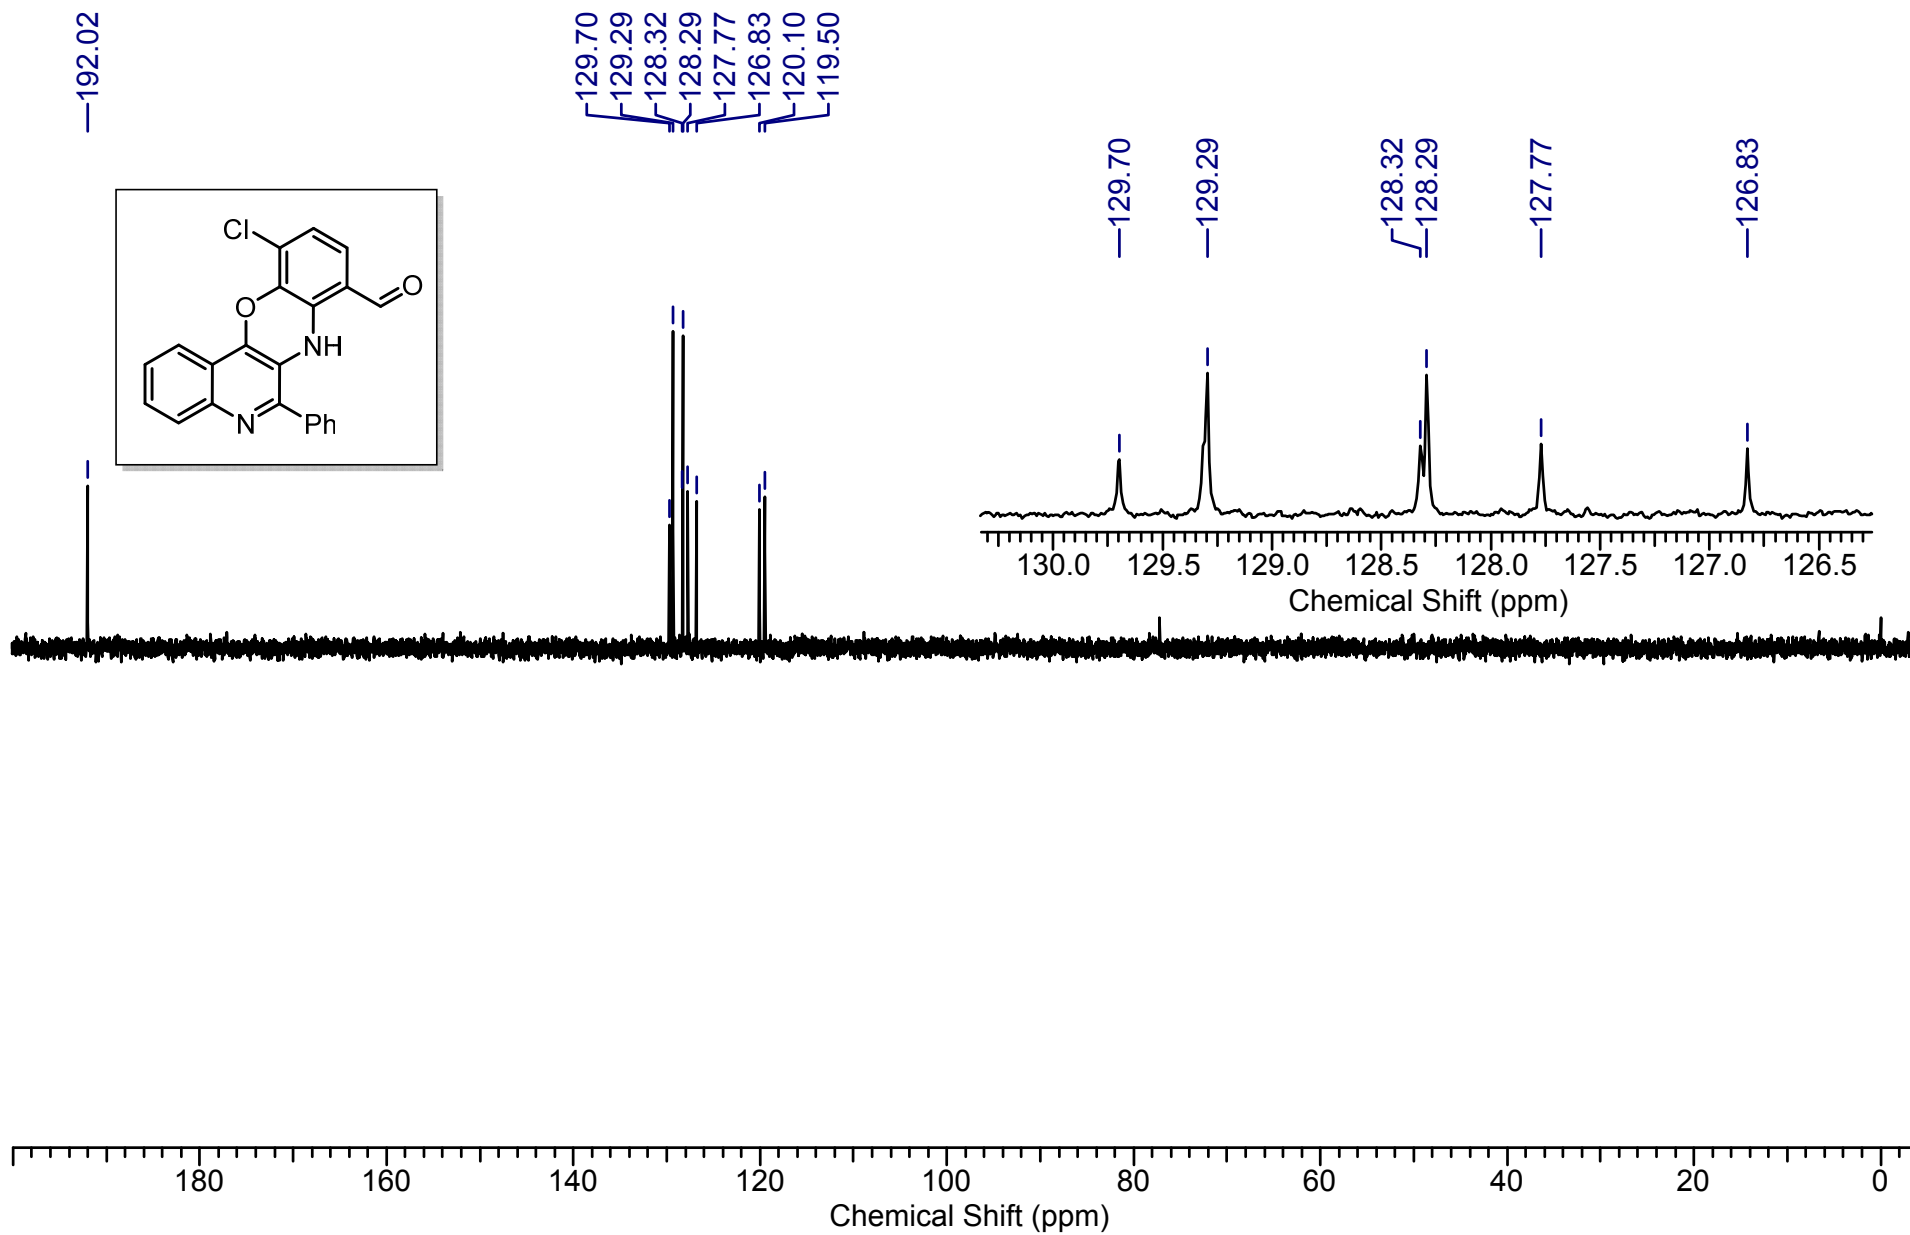

# 3ad

SH-605 #454 RT: 2.41 AV: 1 NL: 2.18E7  
T: FTMS + p ESI Full ms [100.0000-1500.0000]

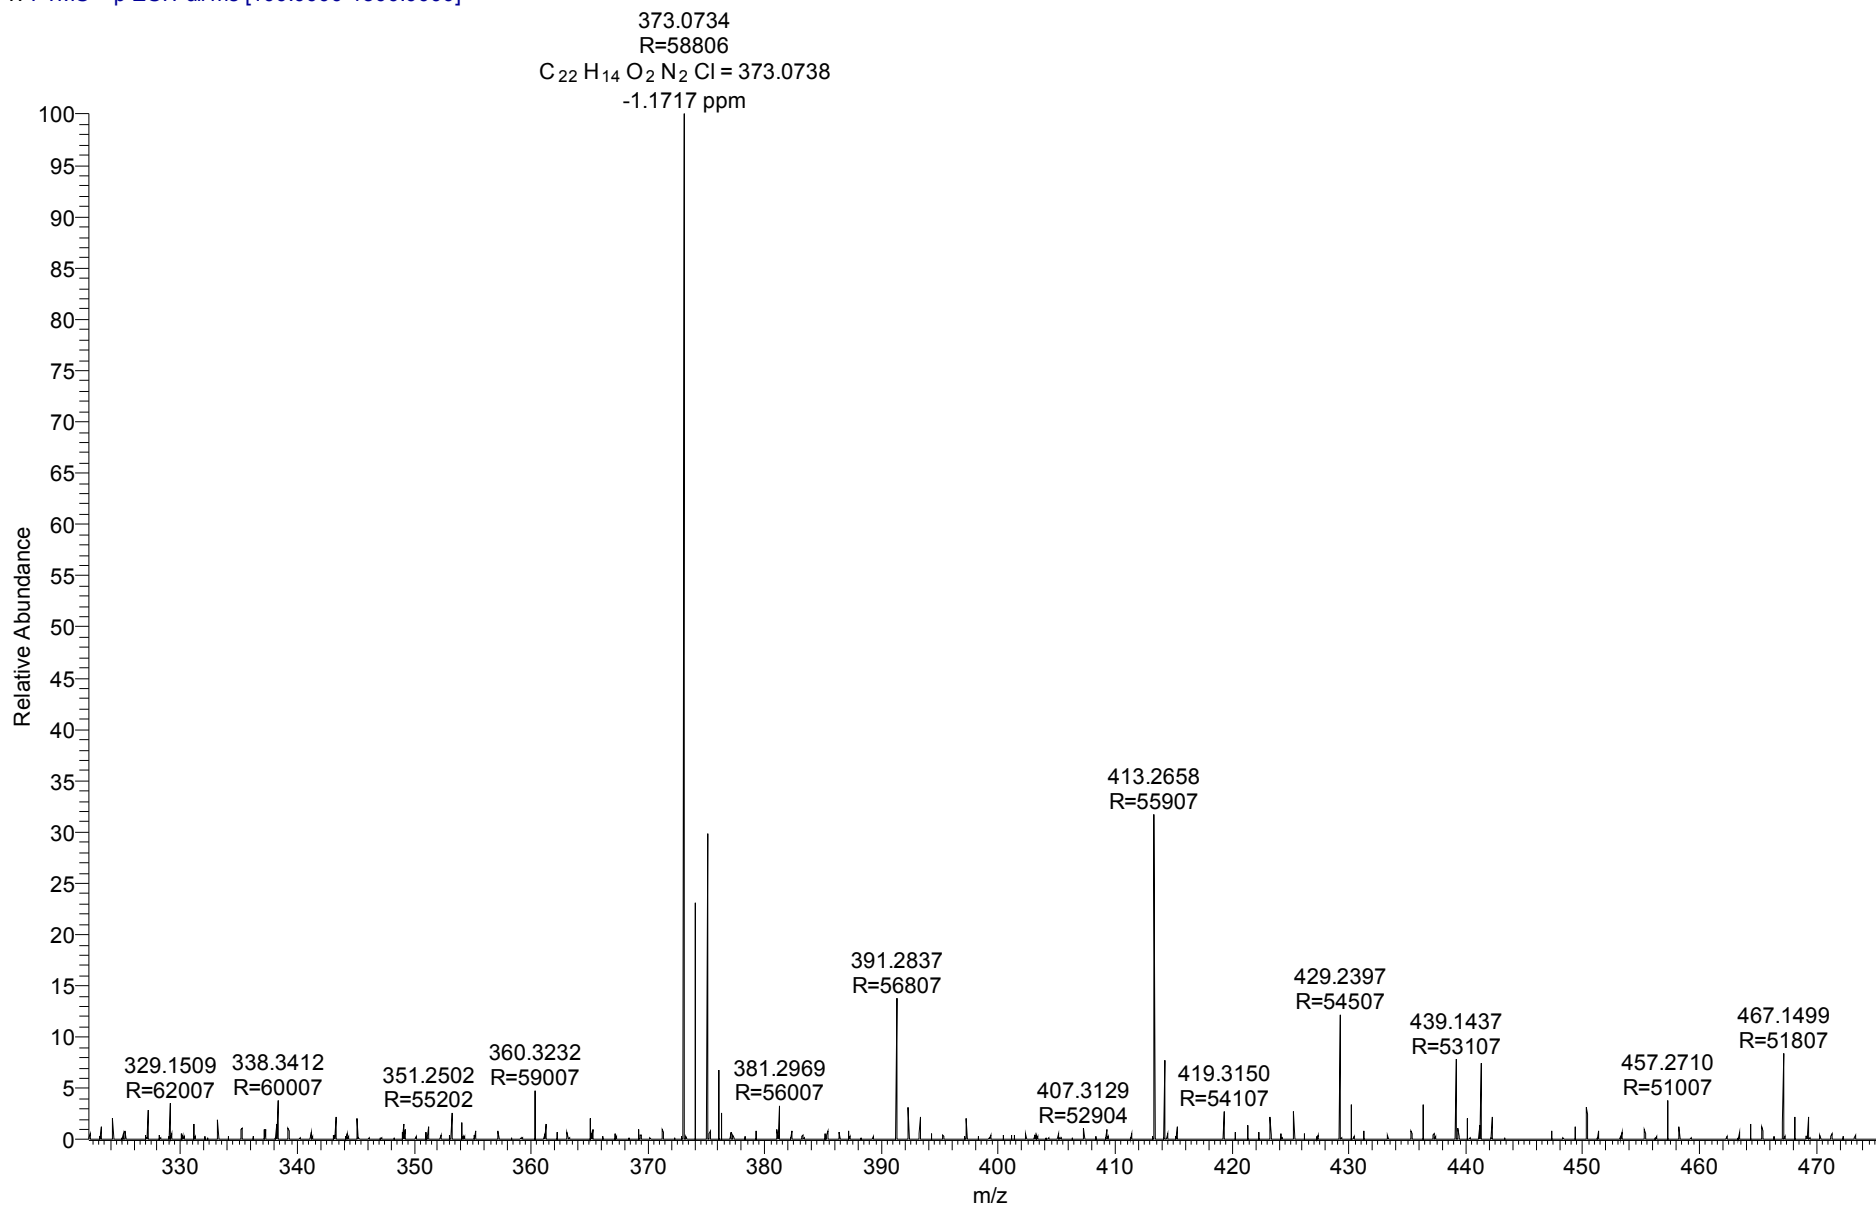

# 3ae

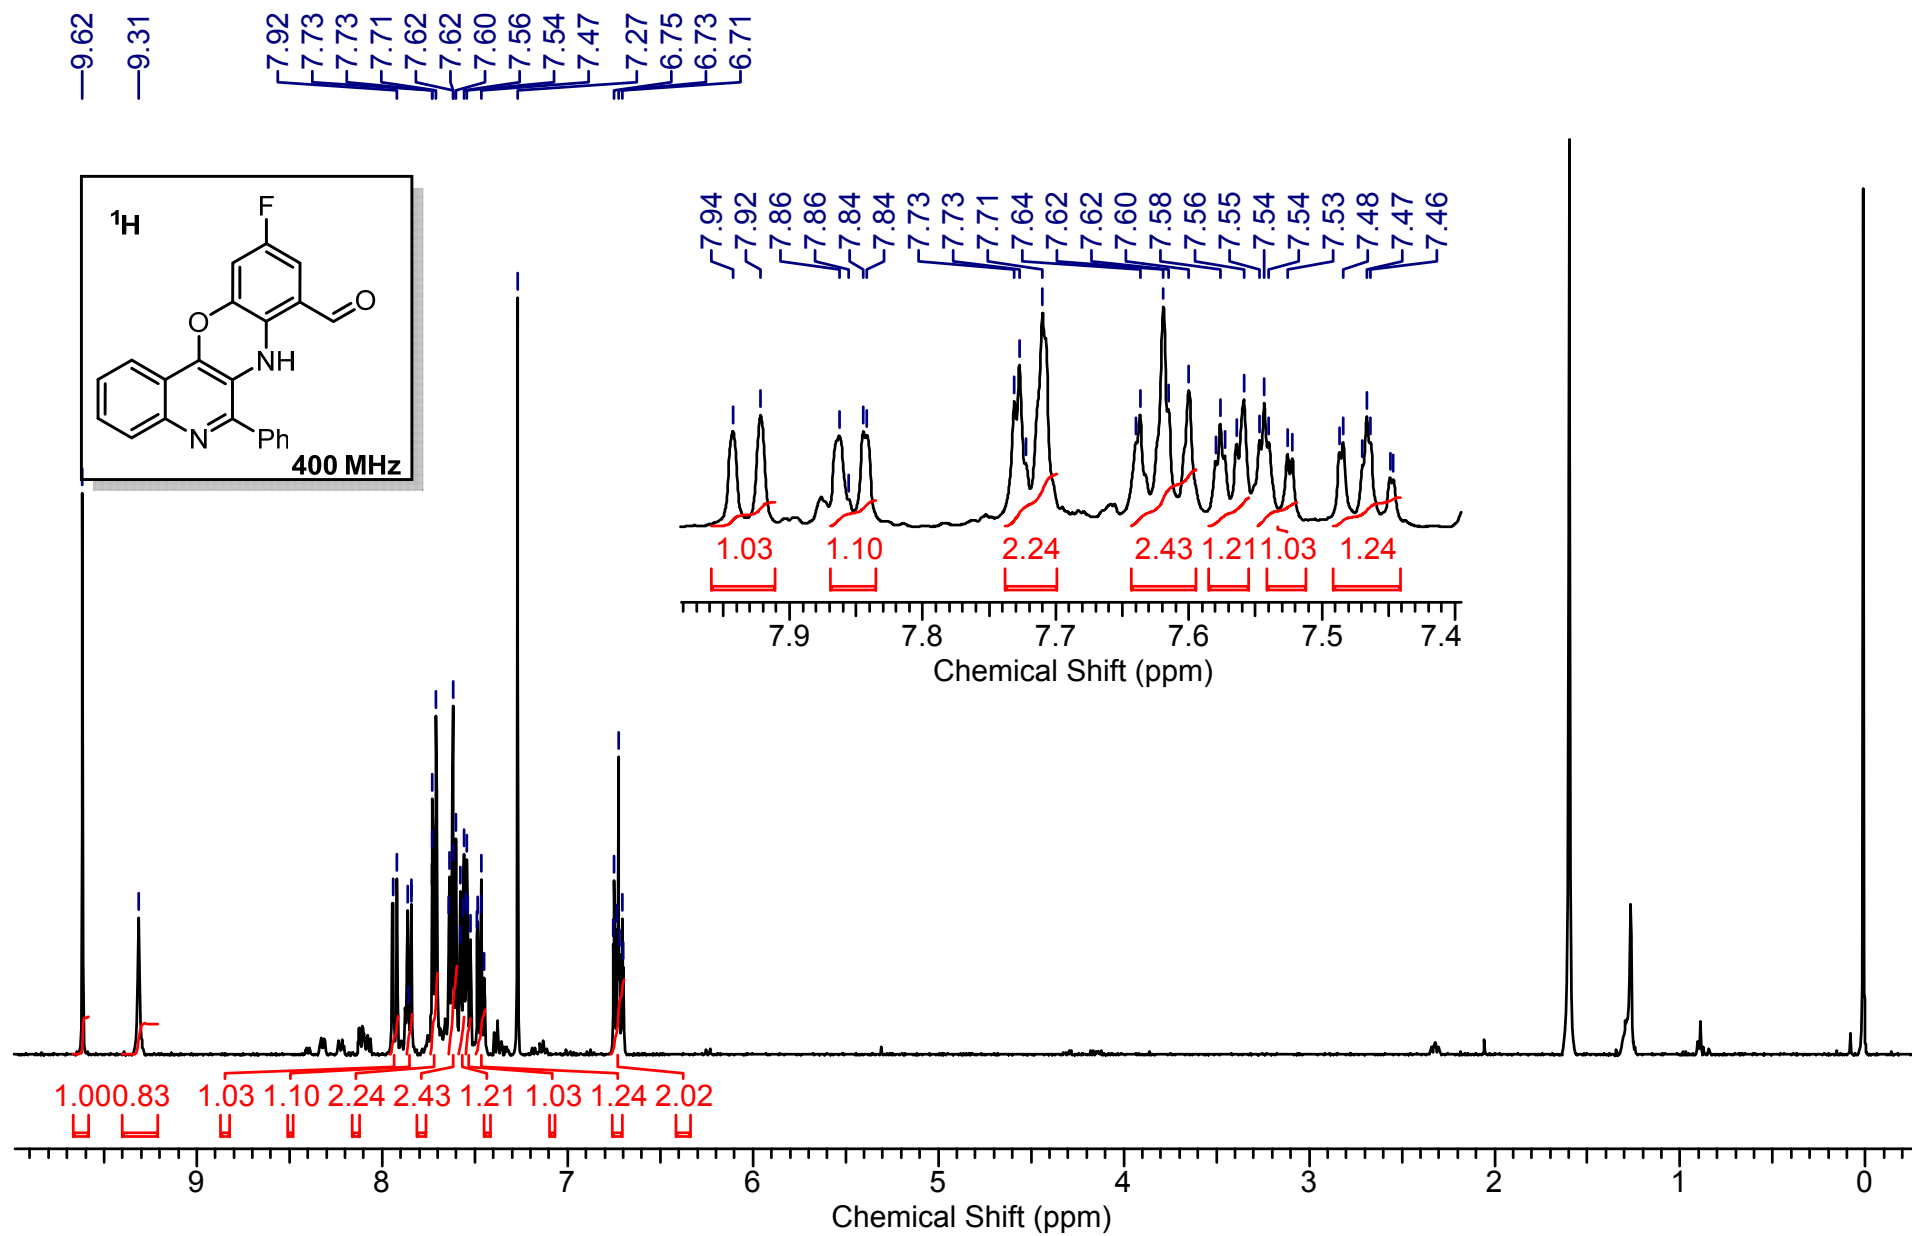

# 3ae

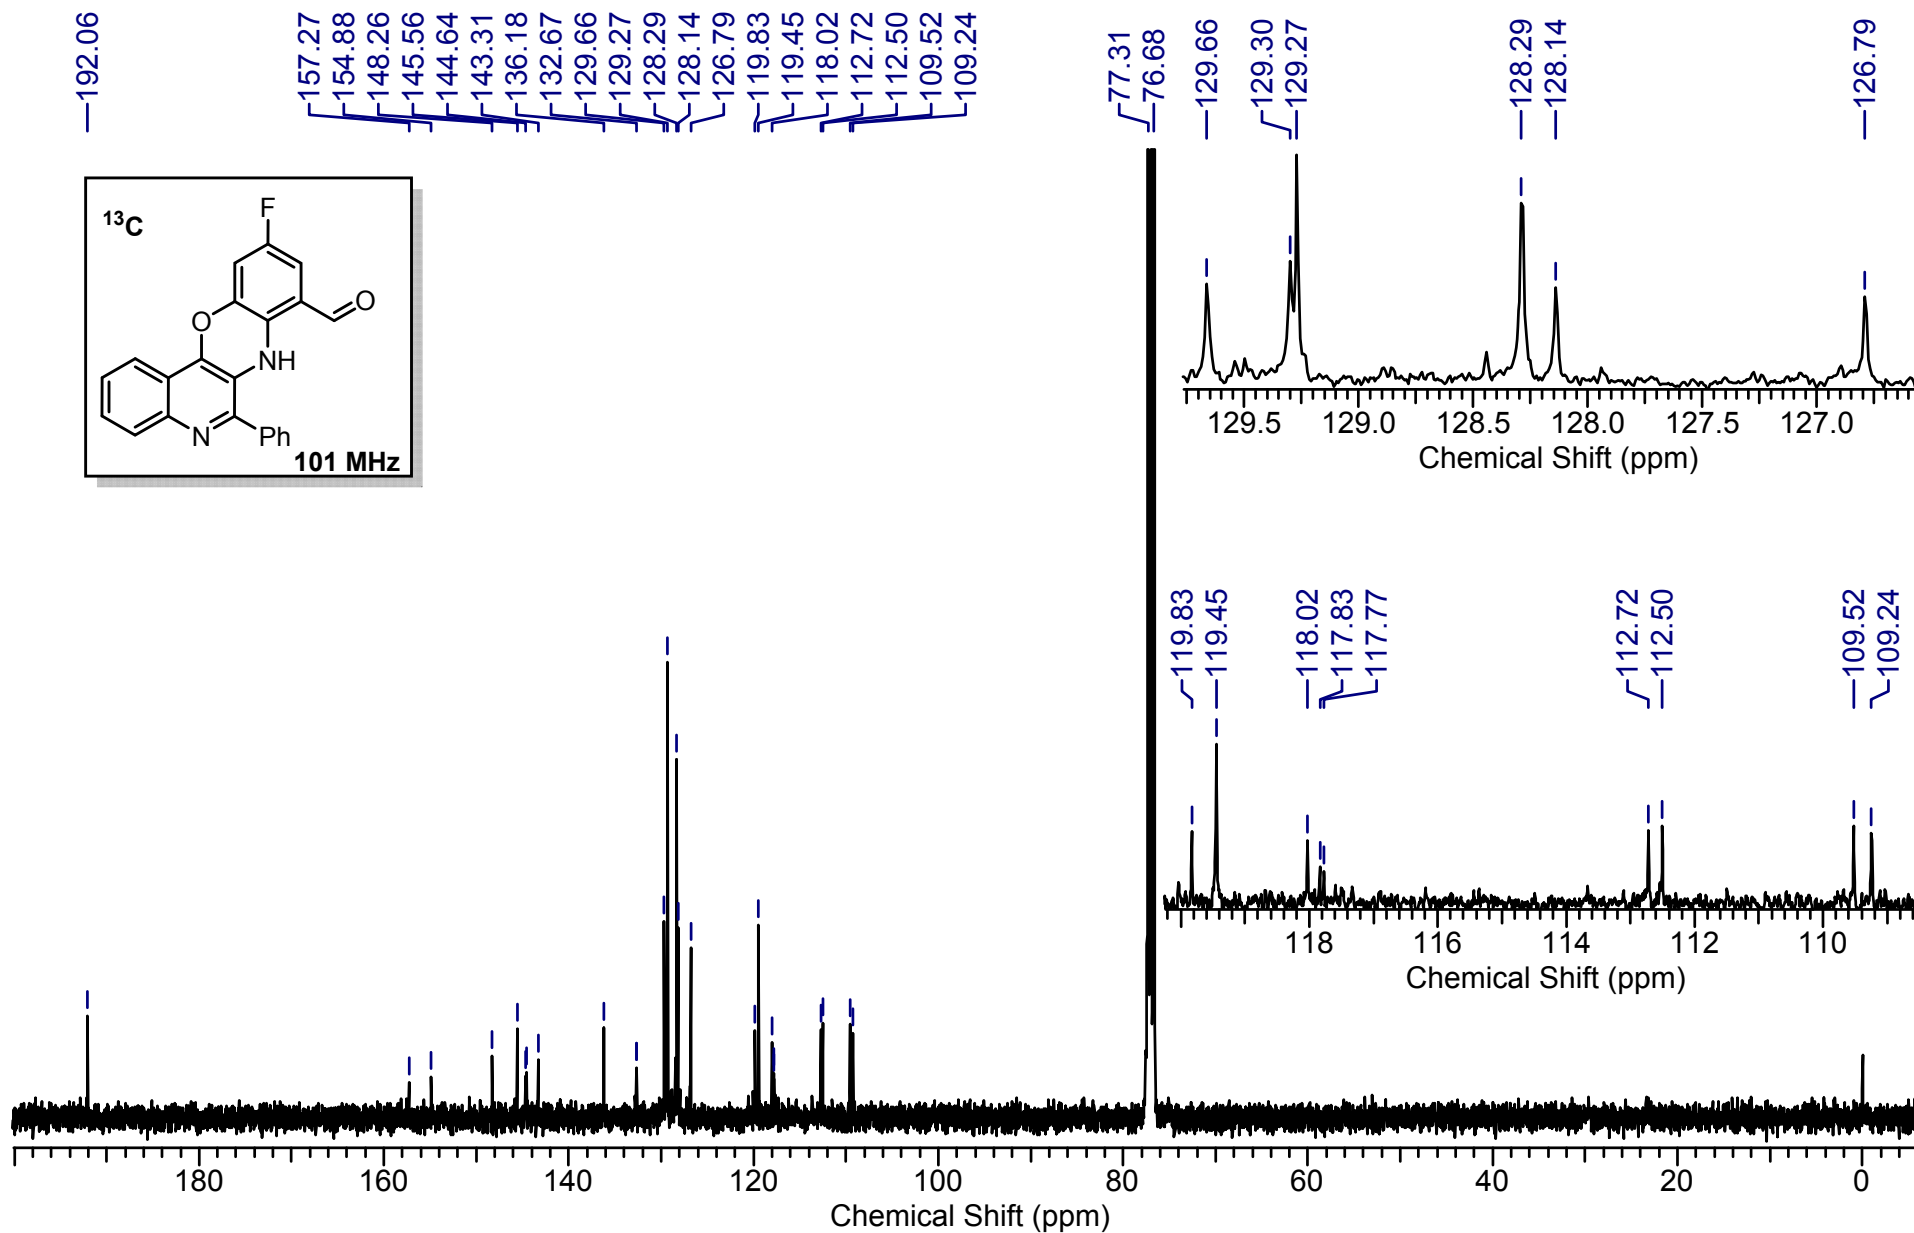

3ae

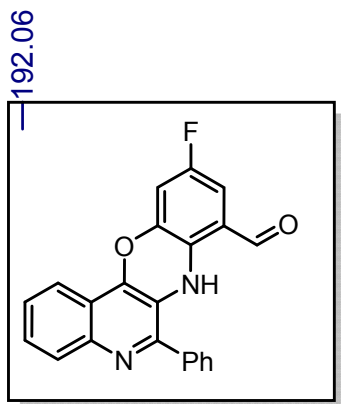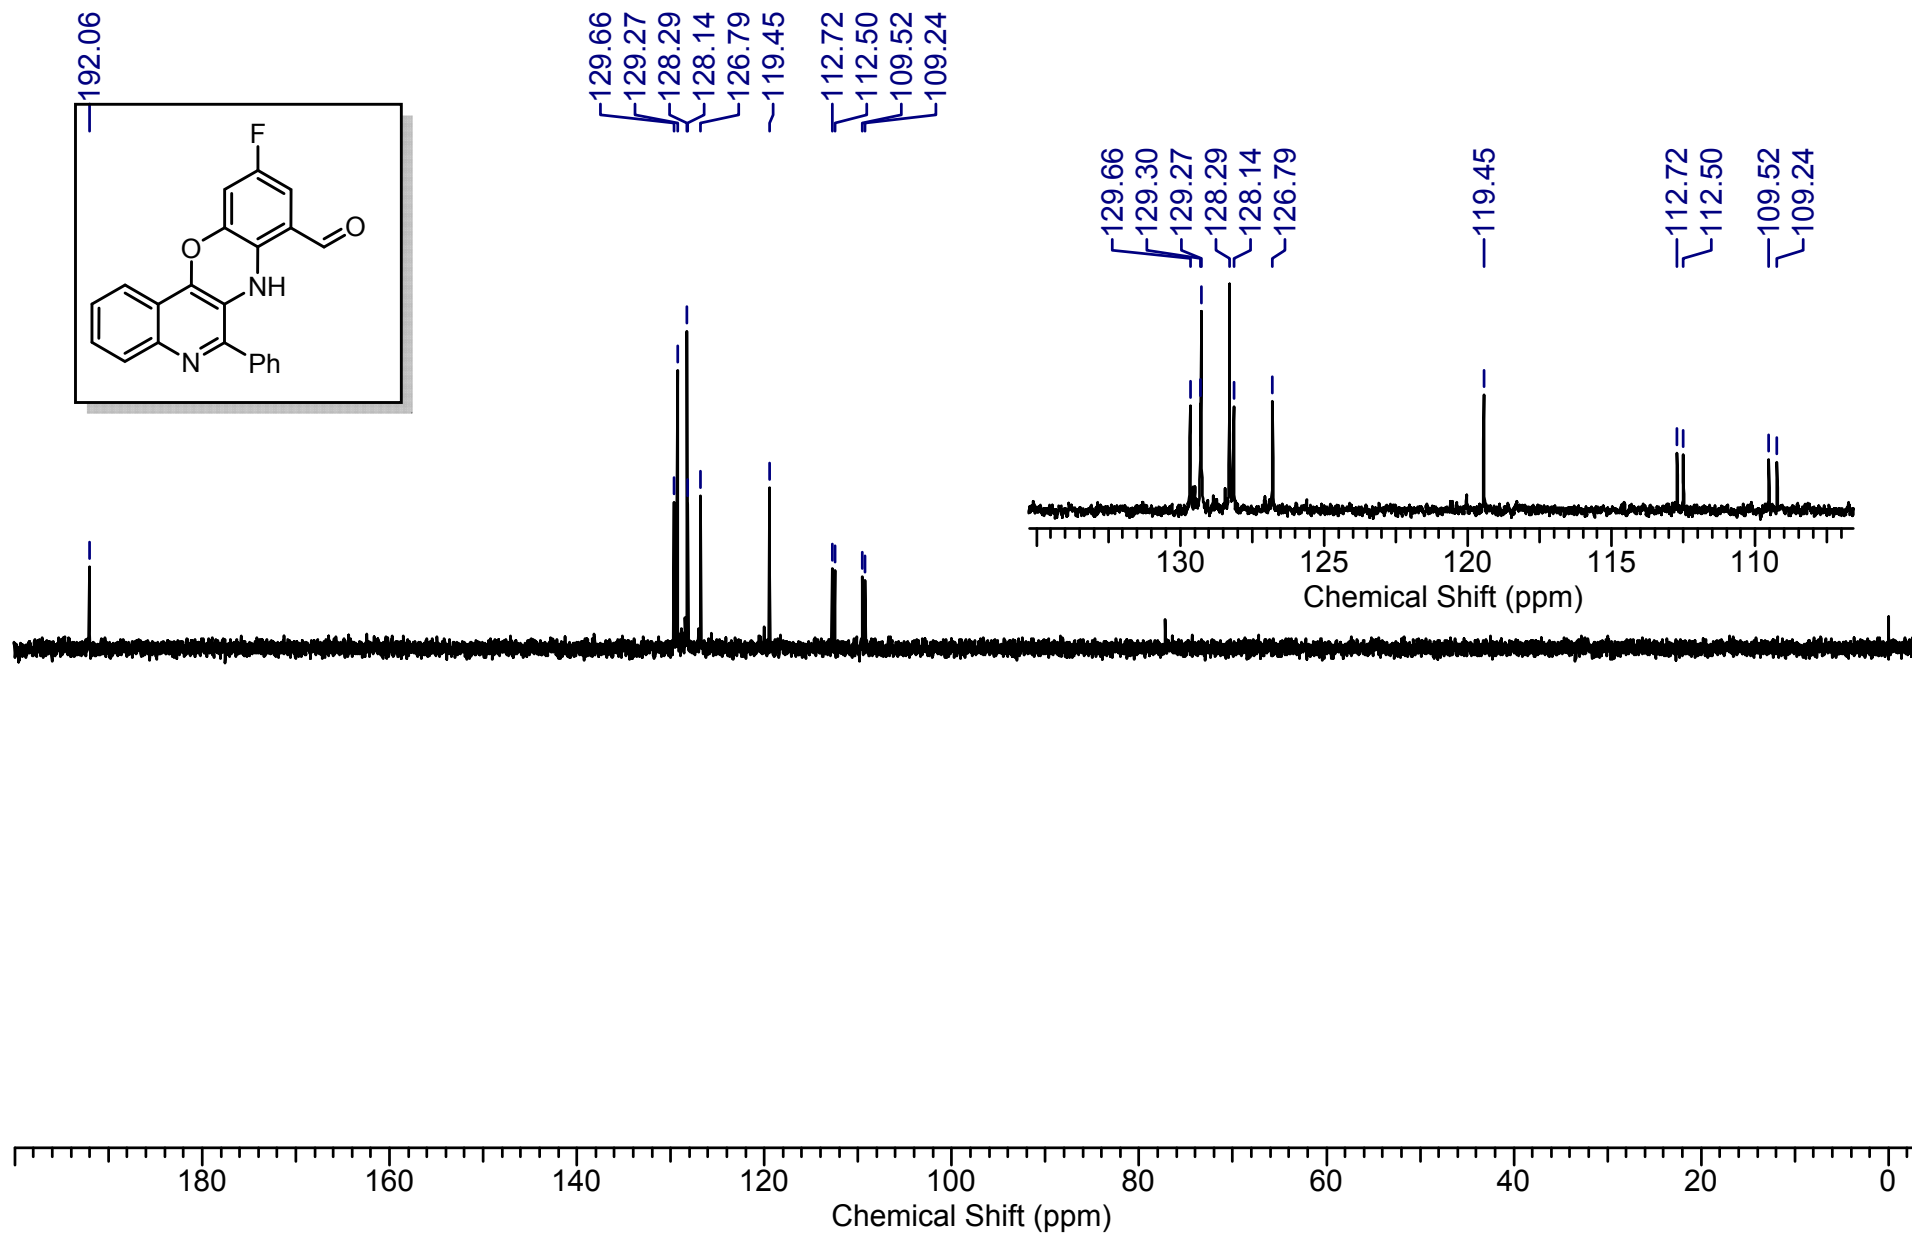

3ae

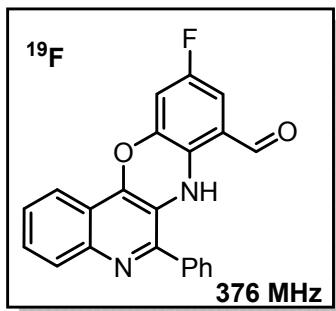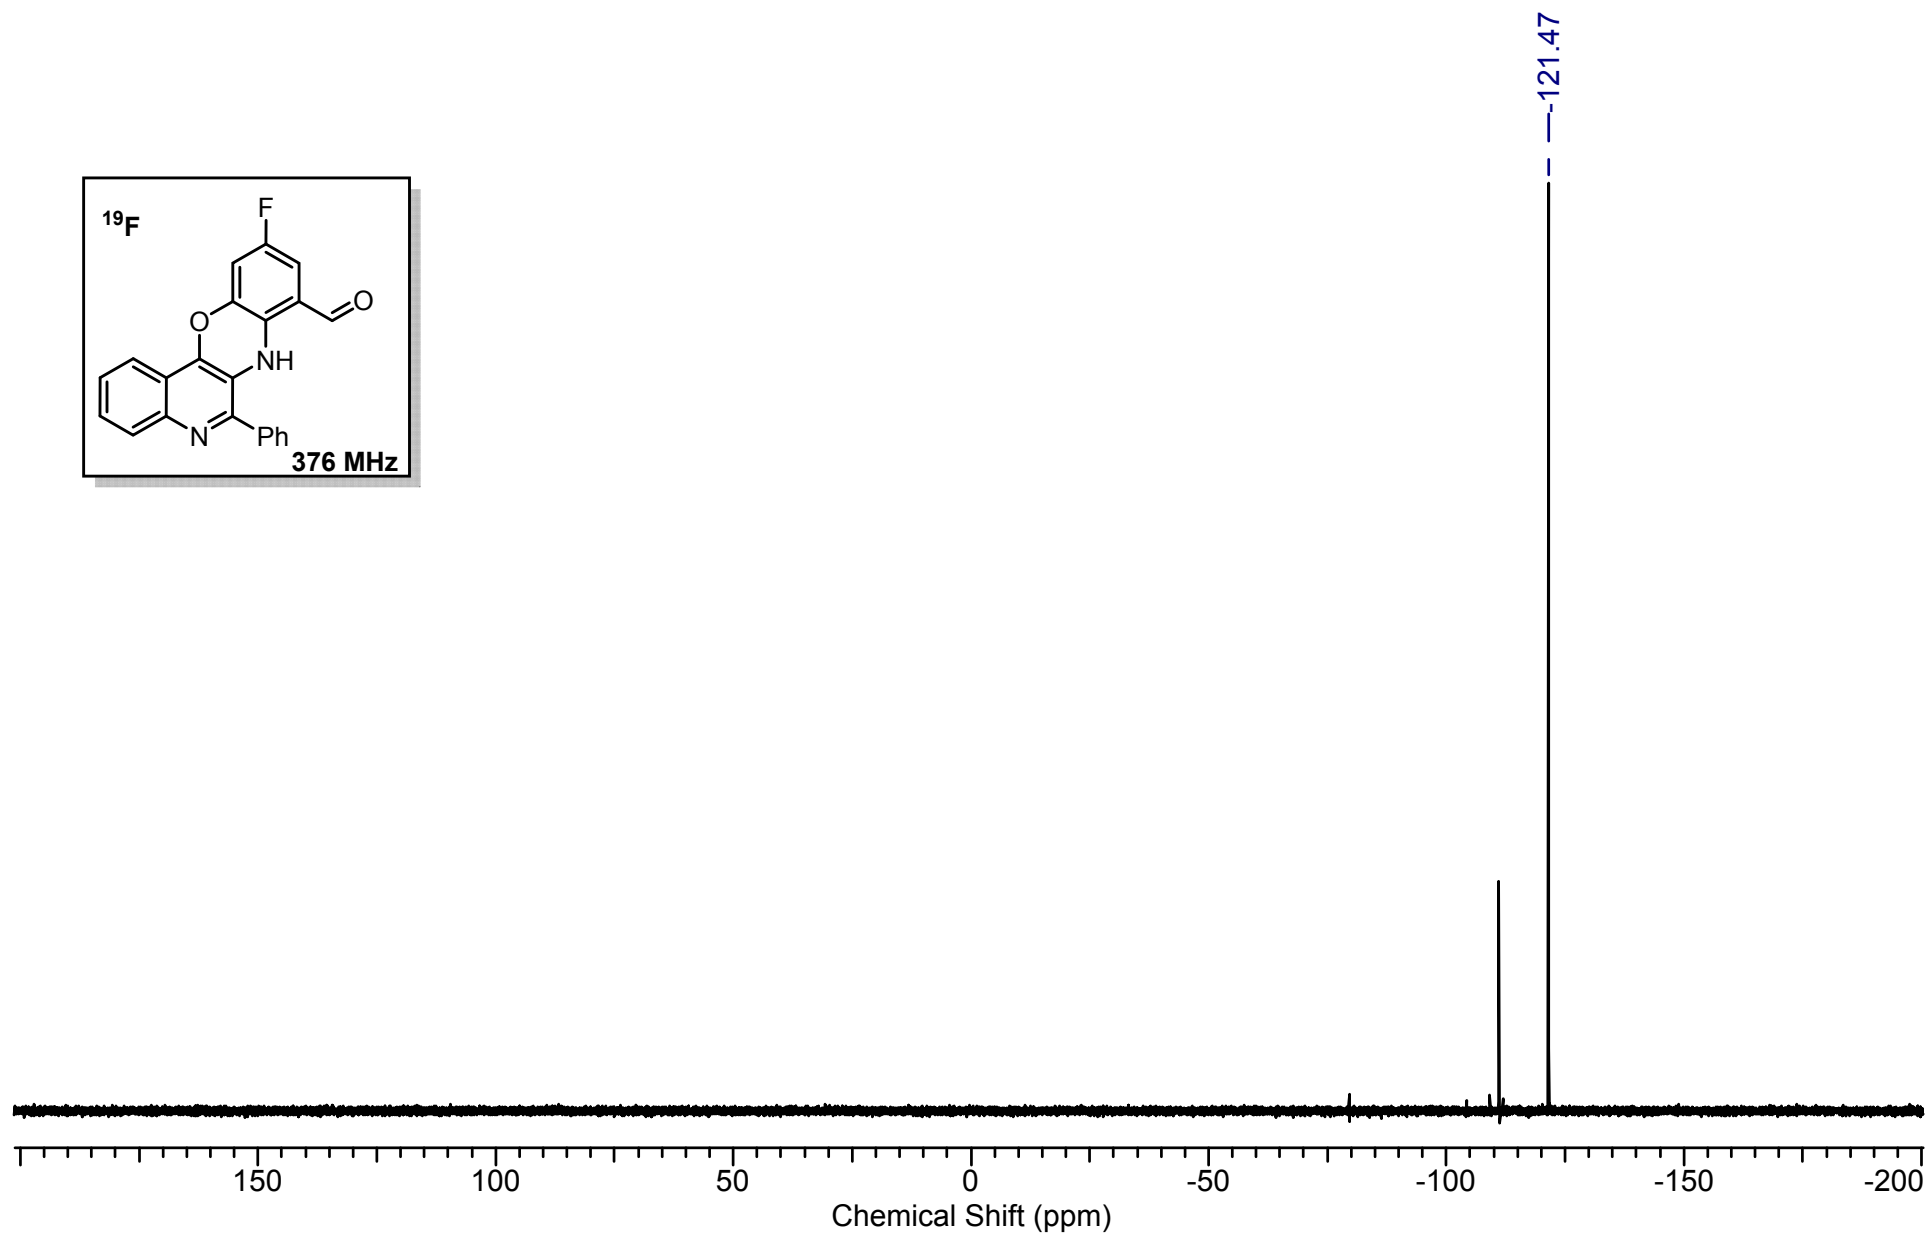



# 3ae

SVH-774 #602 RT: 2.68 AV: 1 NL: 2.49E8  
T: FTMS + p ESI Full ms [100.0000-1500.0000]

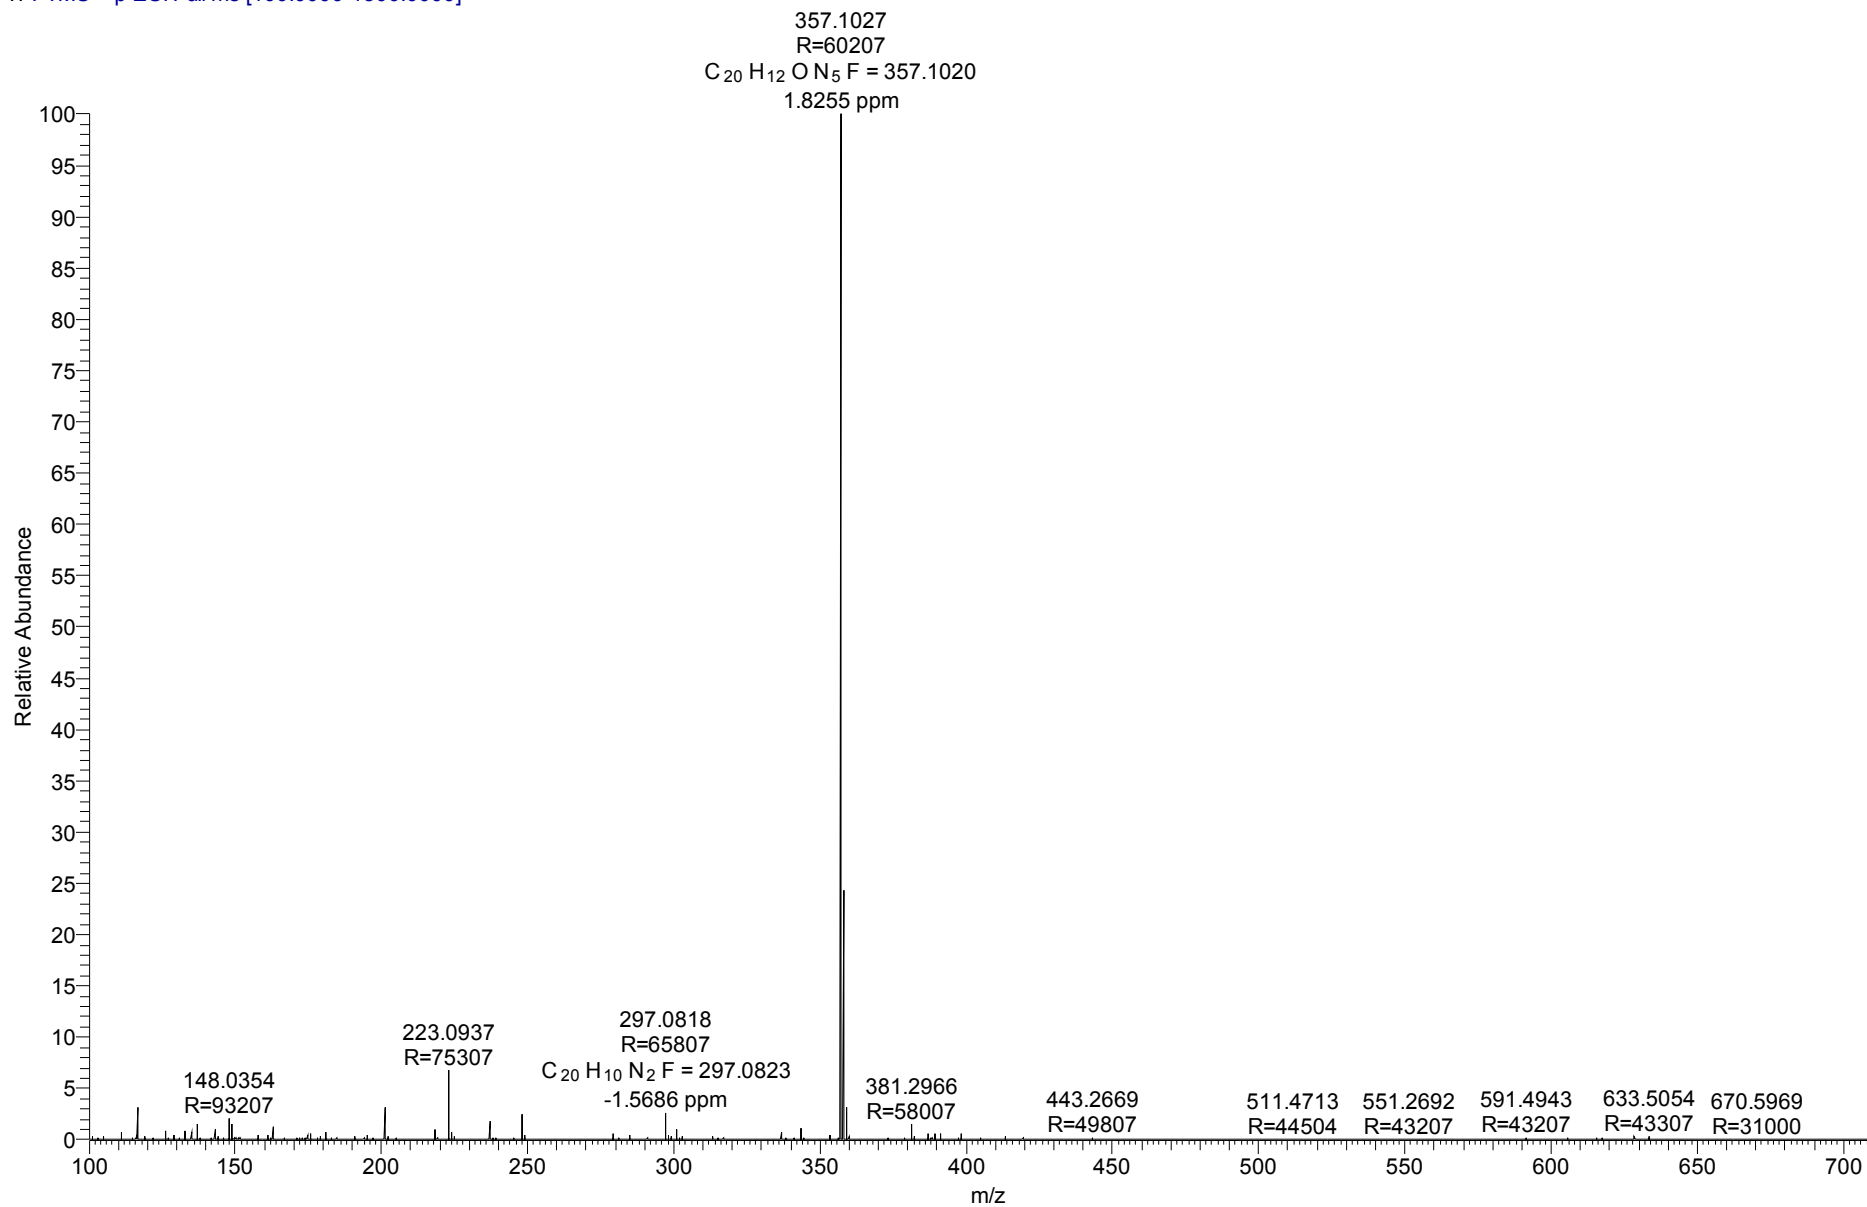

# 3af

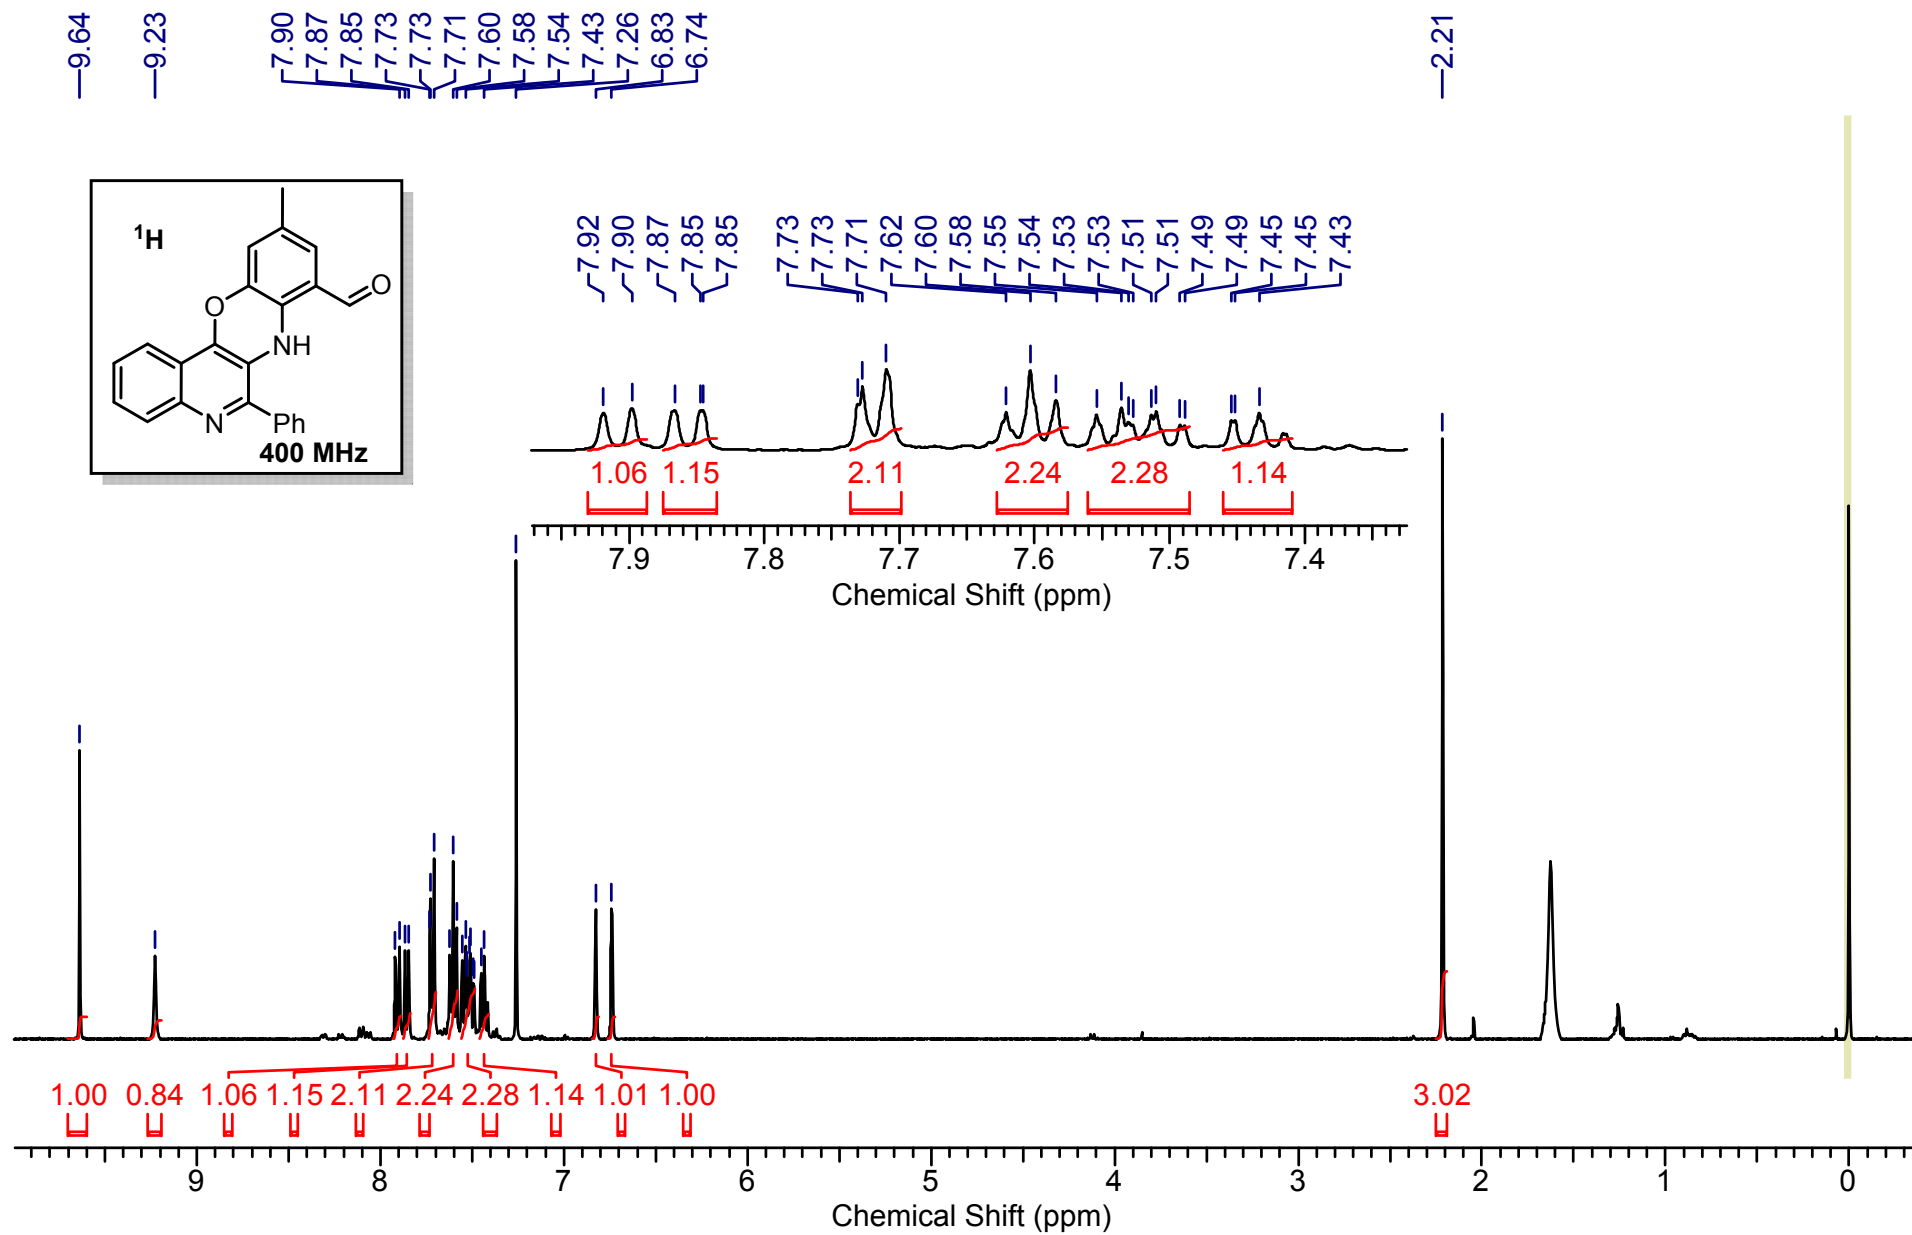

# 3af

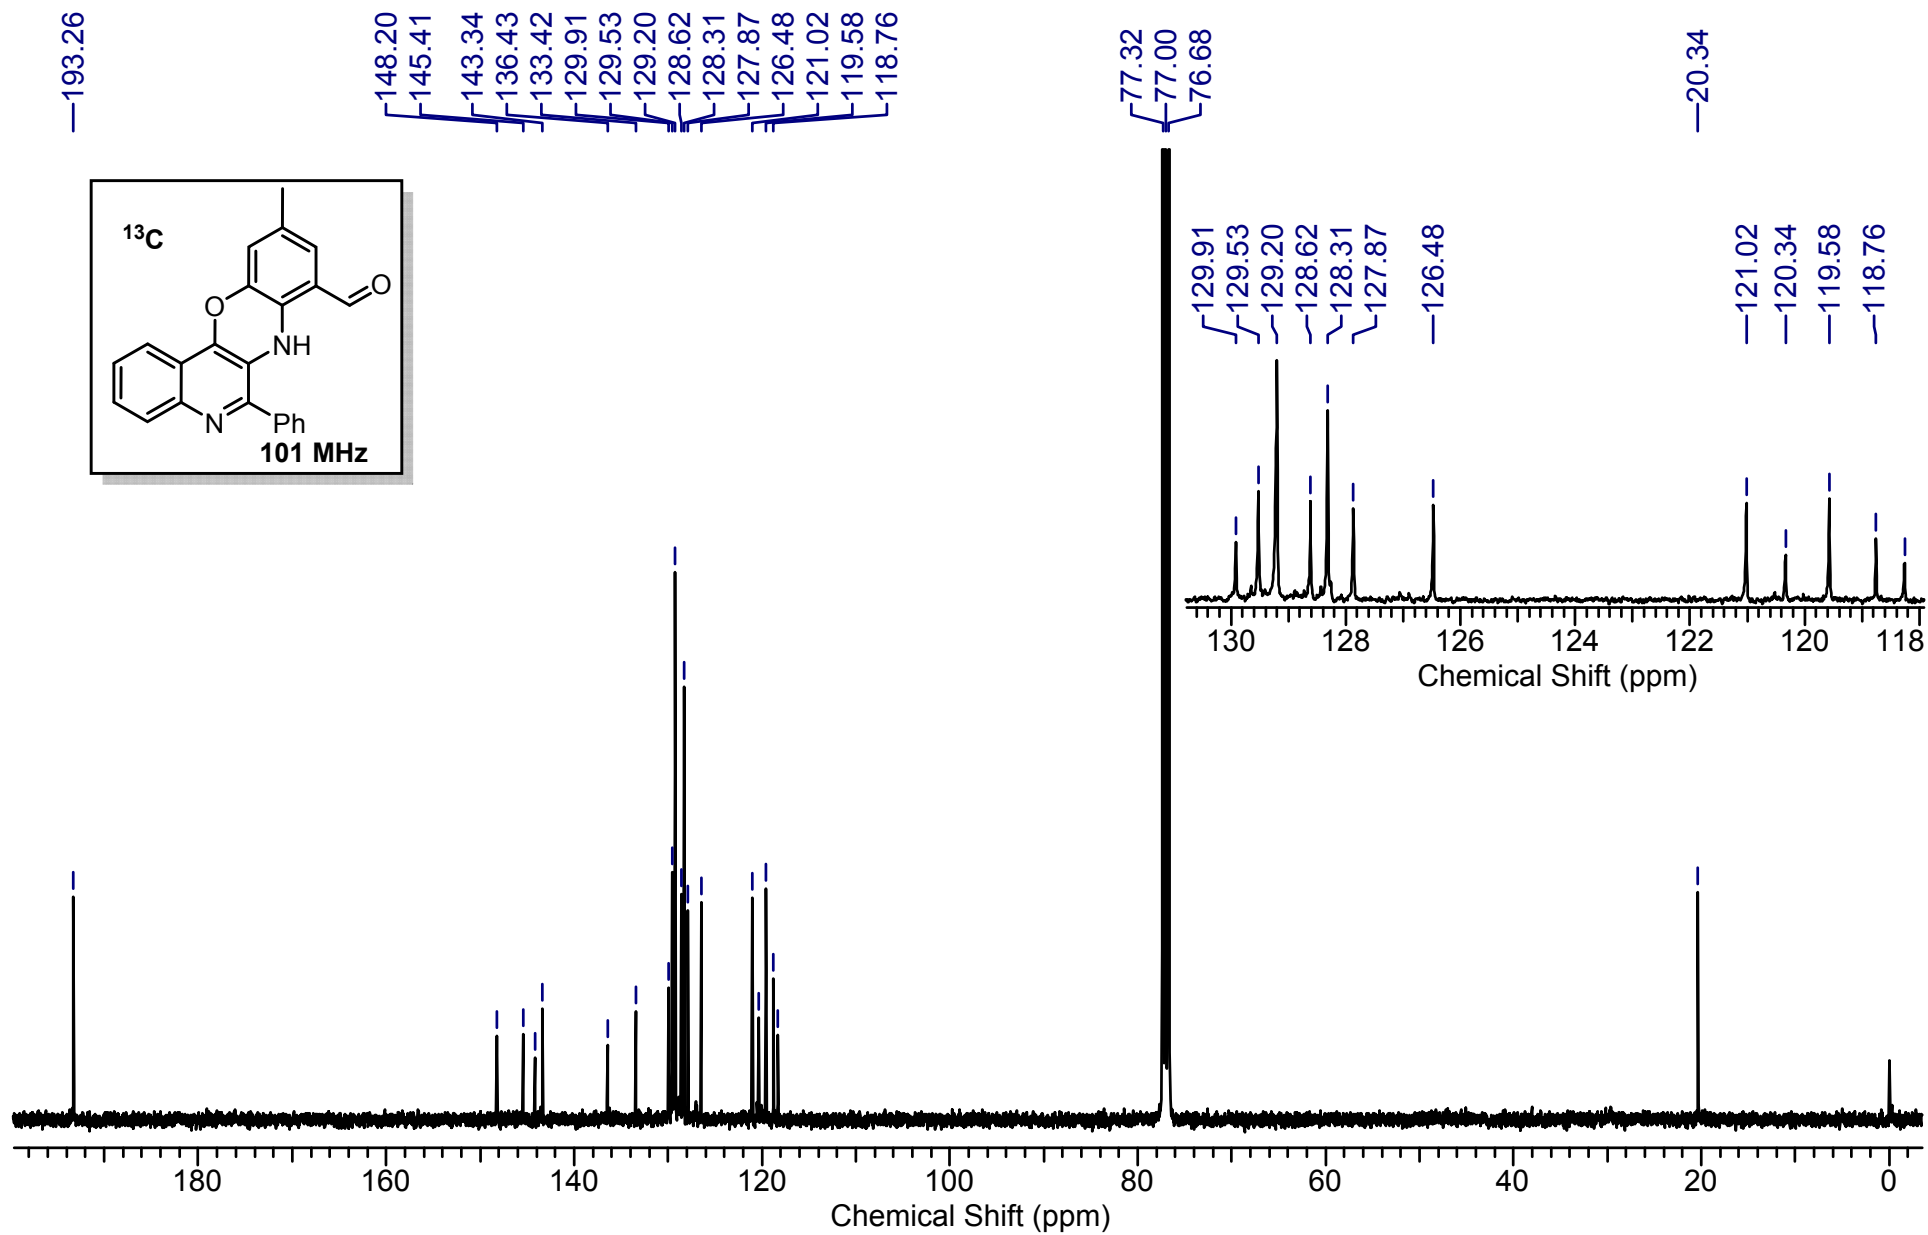

# 3af

—193.26

129.51  
129.18  
128.61  
128.30  
127.86  
126.46  
121.02  
119.56

—20.32

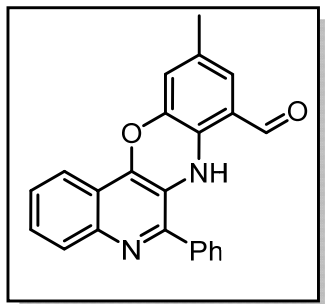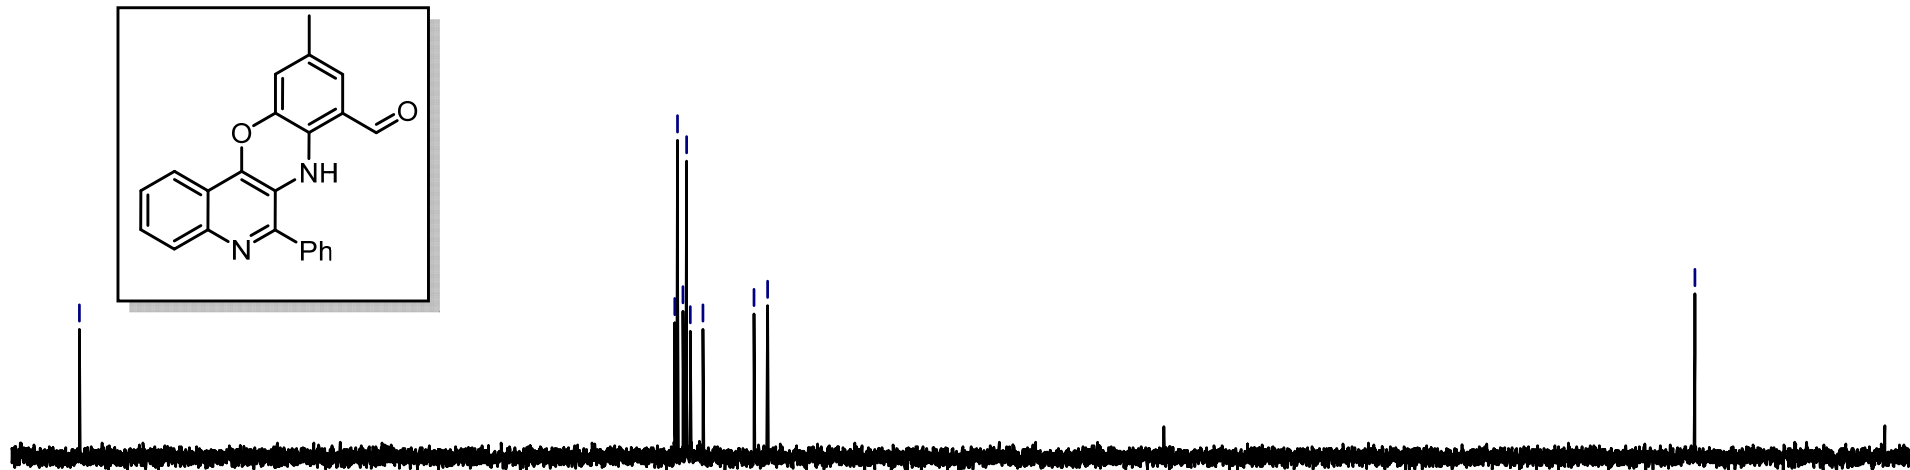

129.51  
129.18  
128.61  
128.30  
127.86  
126.46  
121.02  
119.56

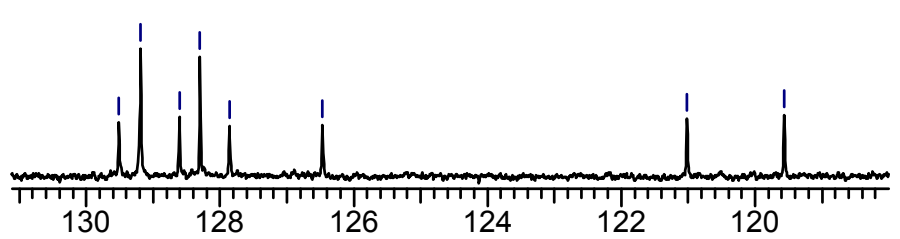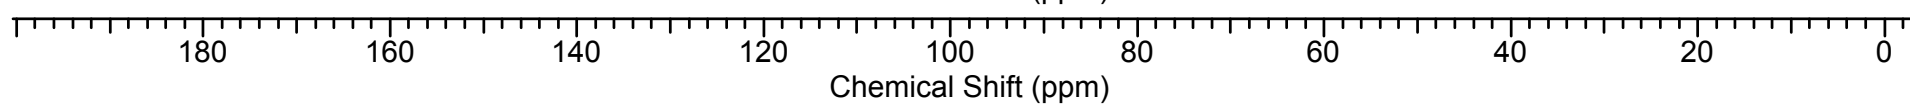

# 3af

SVH-665 #704 RT: 3.14 AV: 1 NL: 2.69E8  
T: FTMS + p ESI Full ms [100.0000-1500.0000]

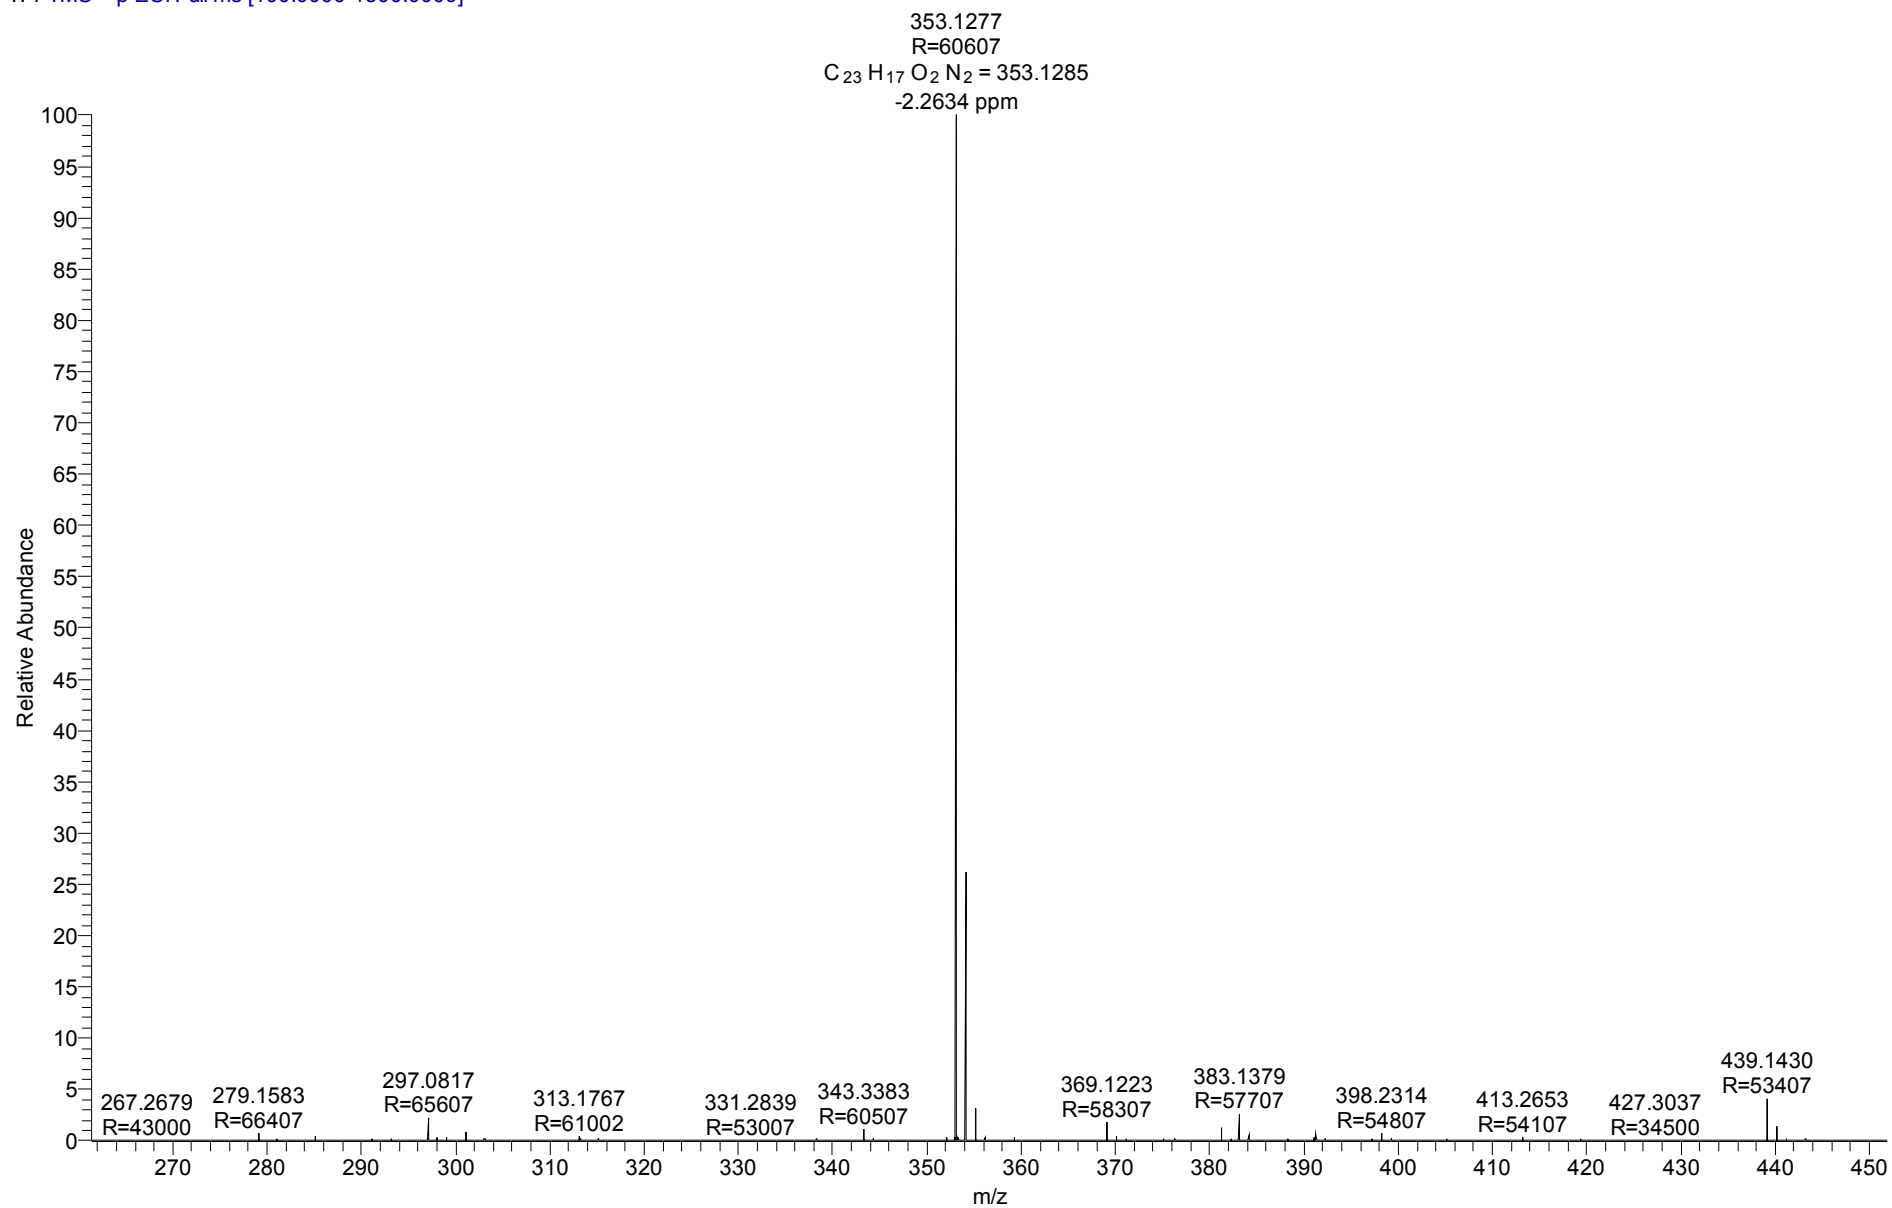

# 3ag

9.64 9.18 7.91 7.74 7.74 7.72 7.63 7.61 7.61 7.59 7.55 7.44 7.27 6.60 6.59 6.49 6.48

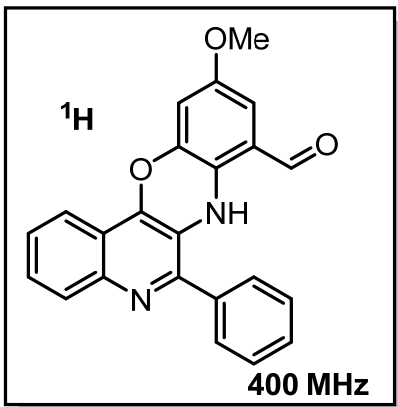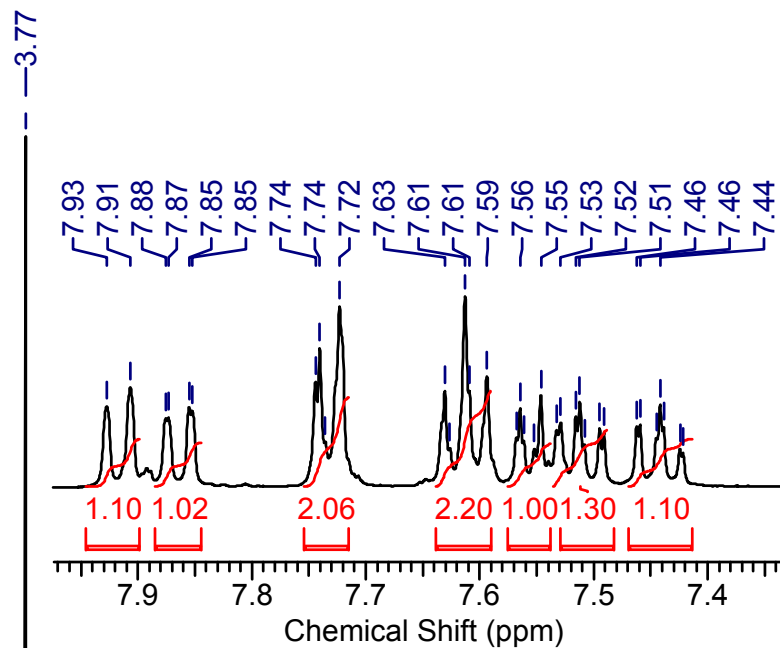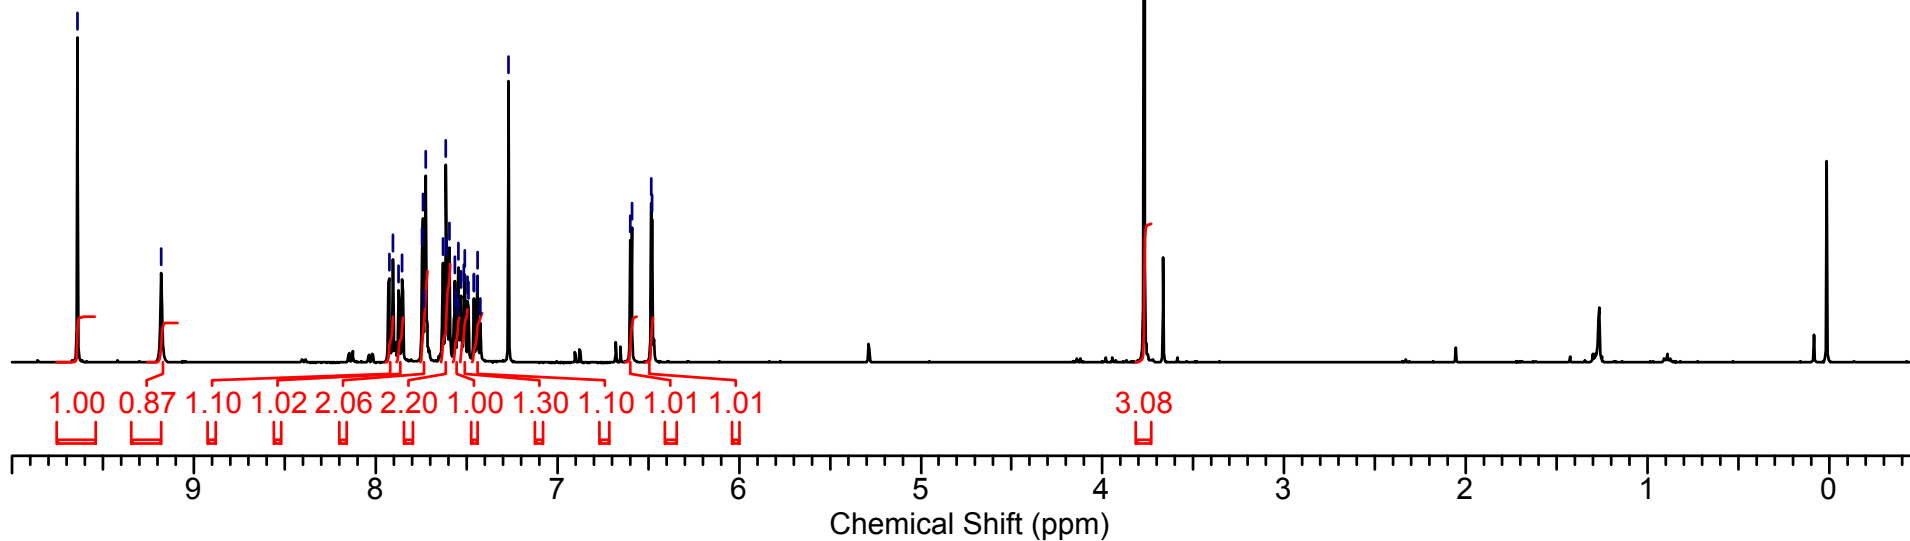

# 3ag

192.88  
153.54  
148.22  
145.26  
144.45  
143.34  
136.43  
130.00  
129.53  
129.20  
128.31  
127.76  
126.55  
120.39  
119.51  
118.30  
109.73  
109.52

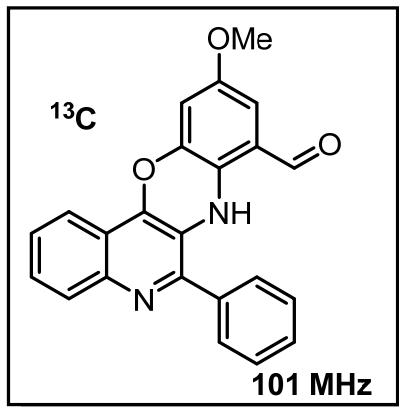

77.32  
77.00  
76.68

130.00  
129.53  
129.22  
129.20  
128.31  
127.76  
126.55

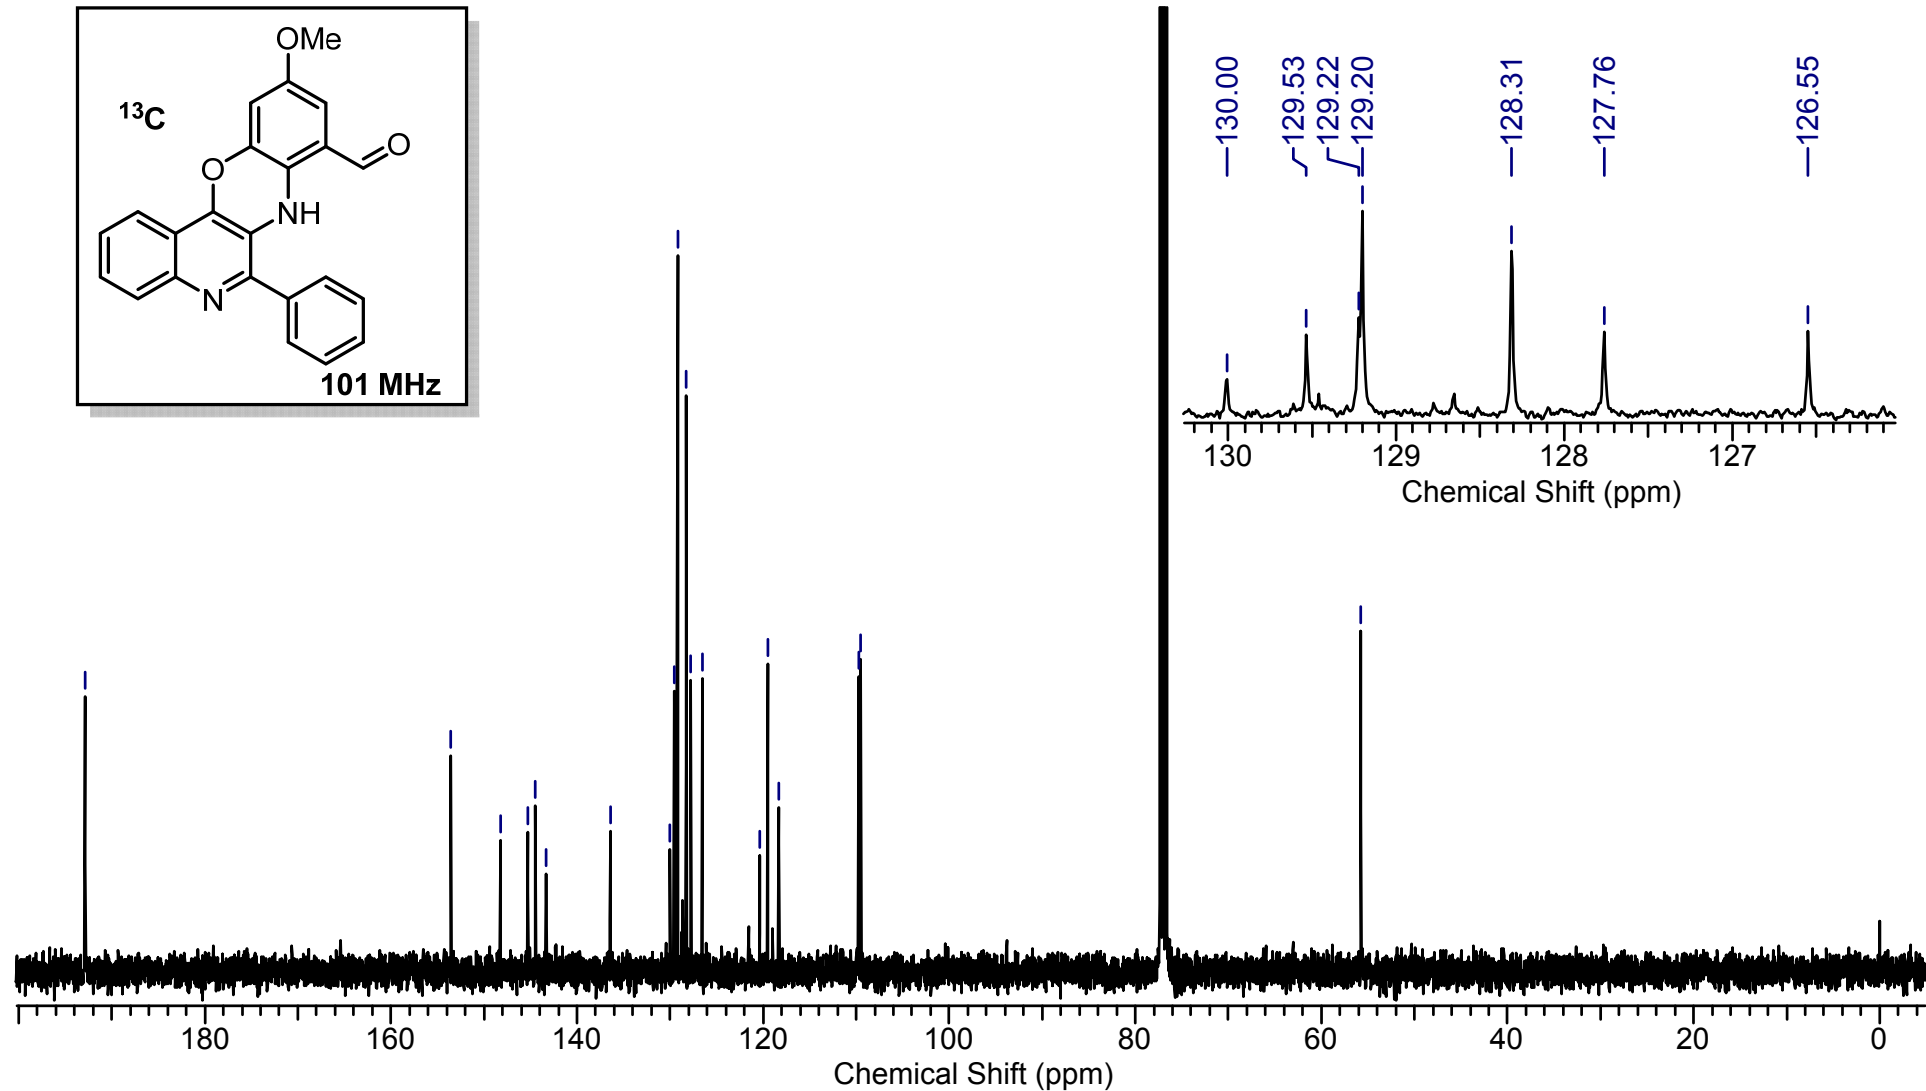

# 3ag

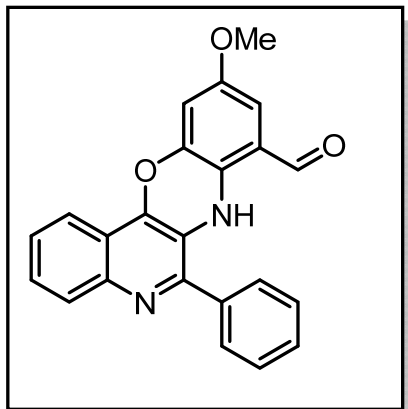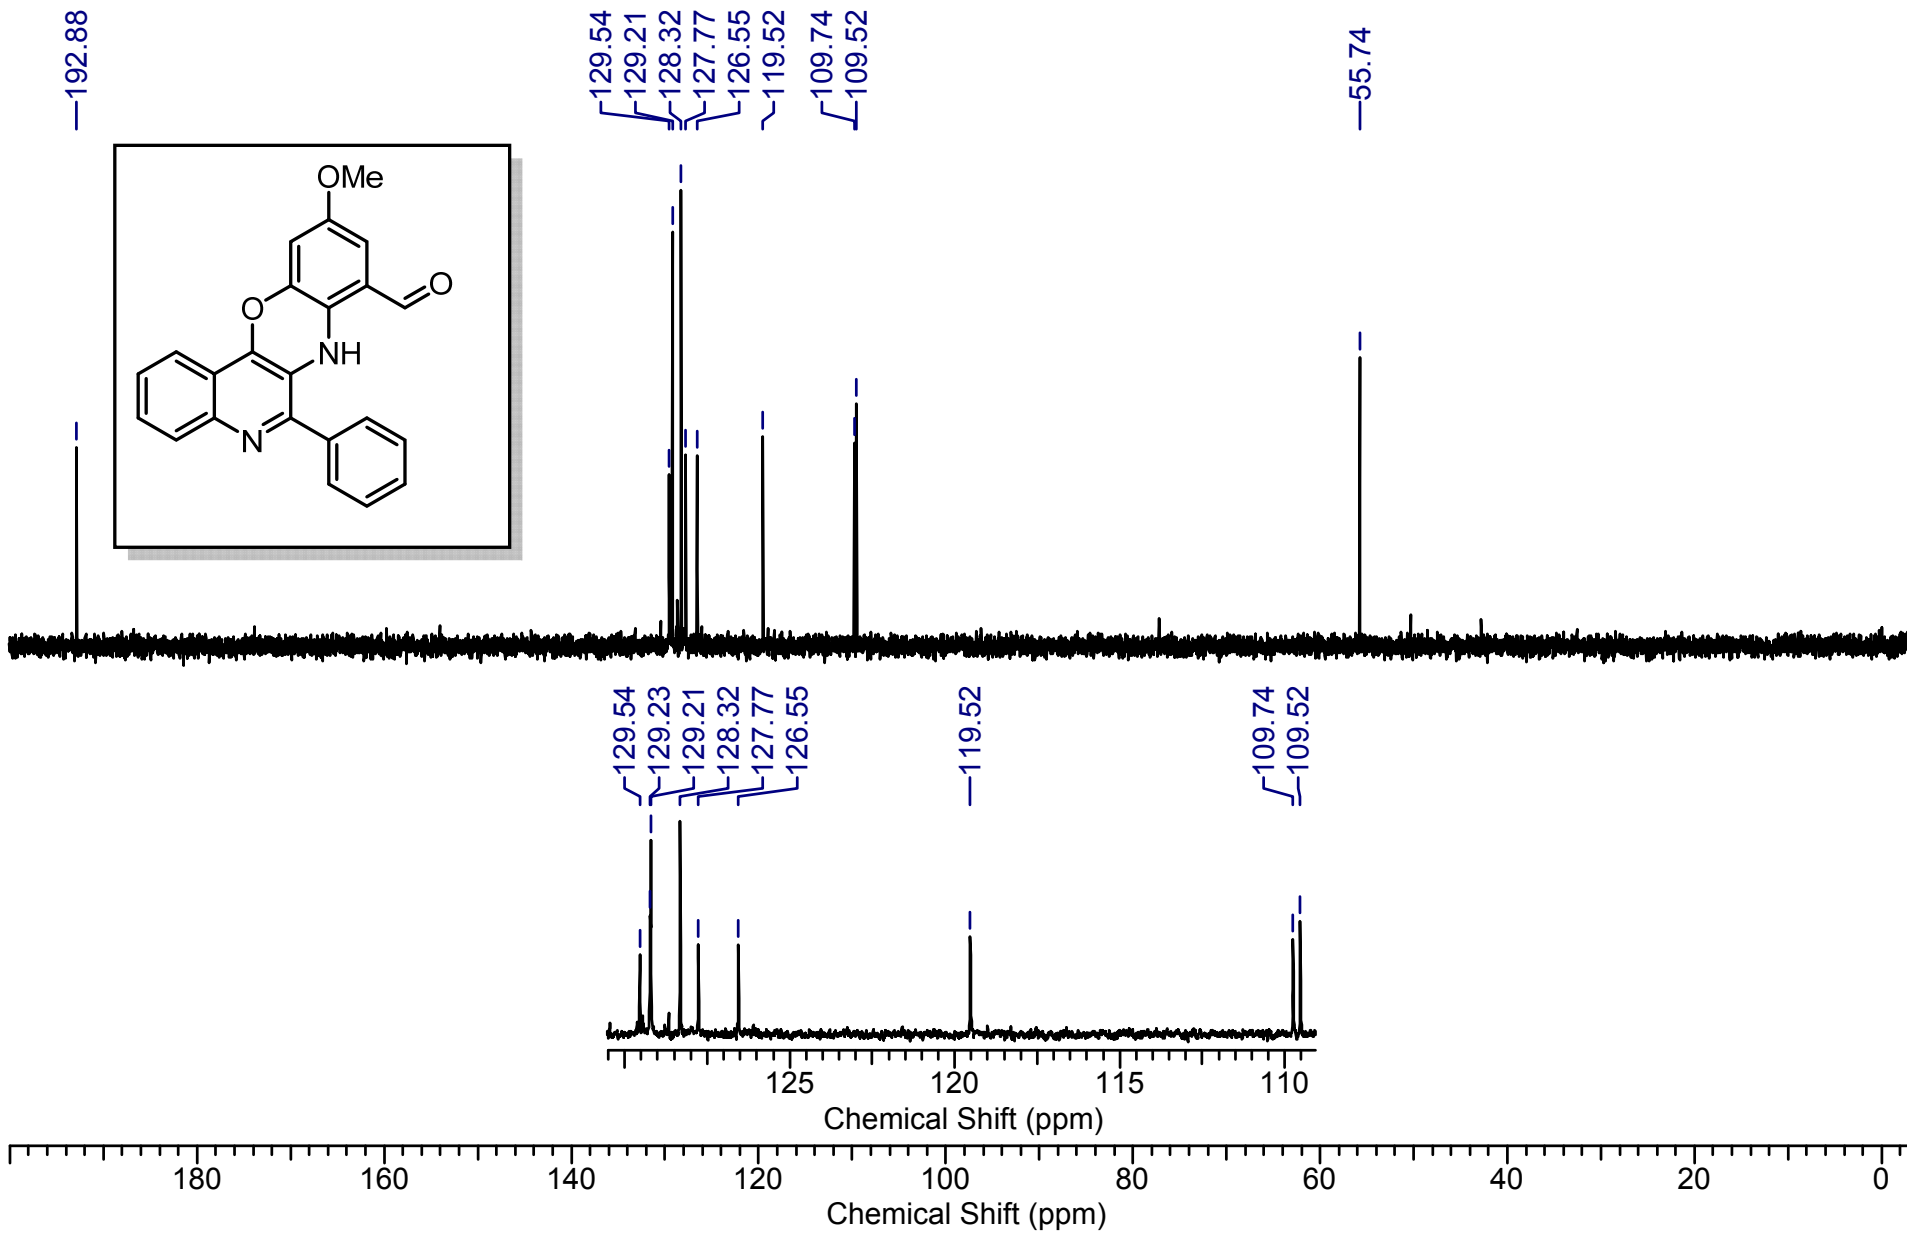



# 3ag

SVH-842 #399 RT: 1.78 AV: 1 NL: 8.00E7  
T: FTMS + p ESI Full ms [100.0000-1500.0000]

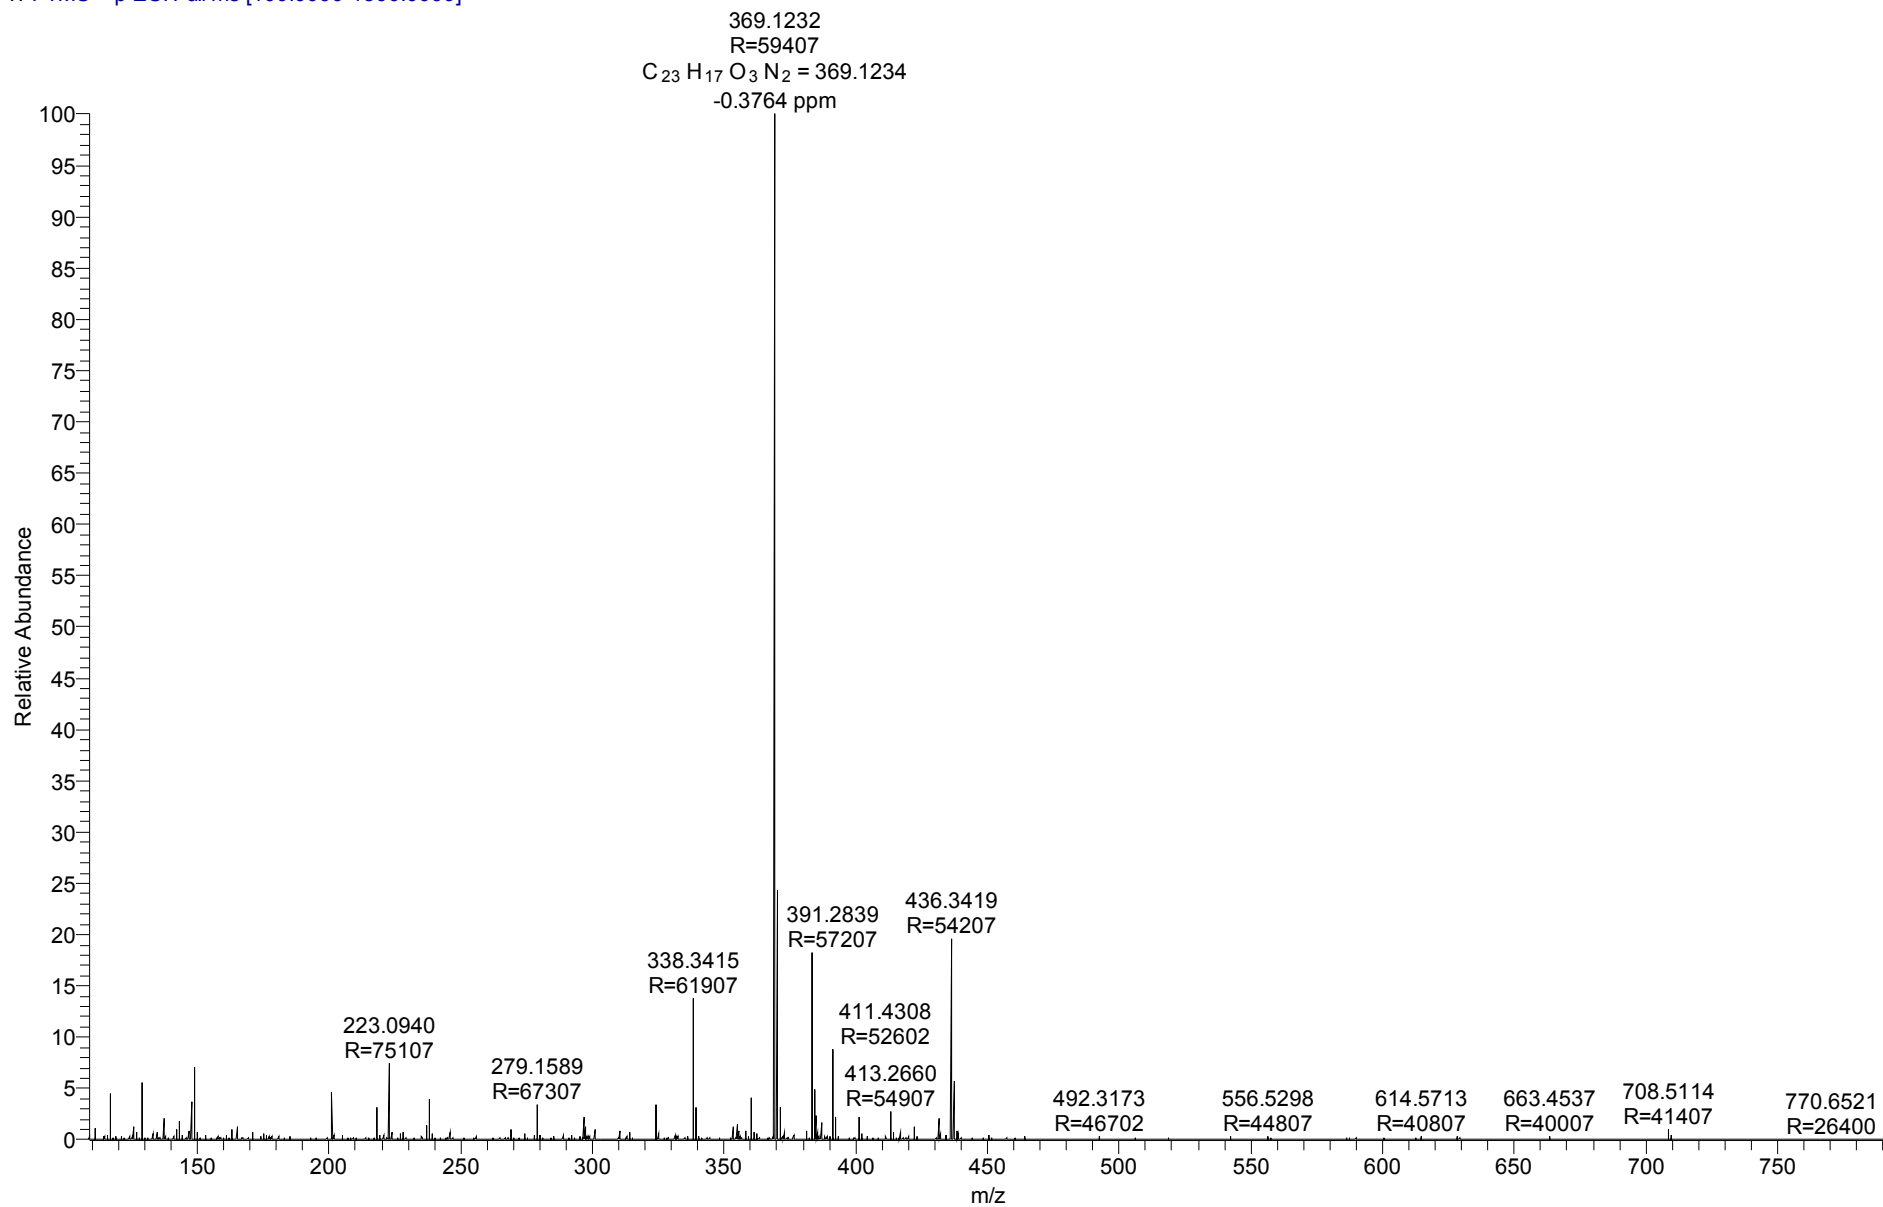

# 3ah

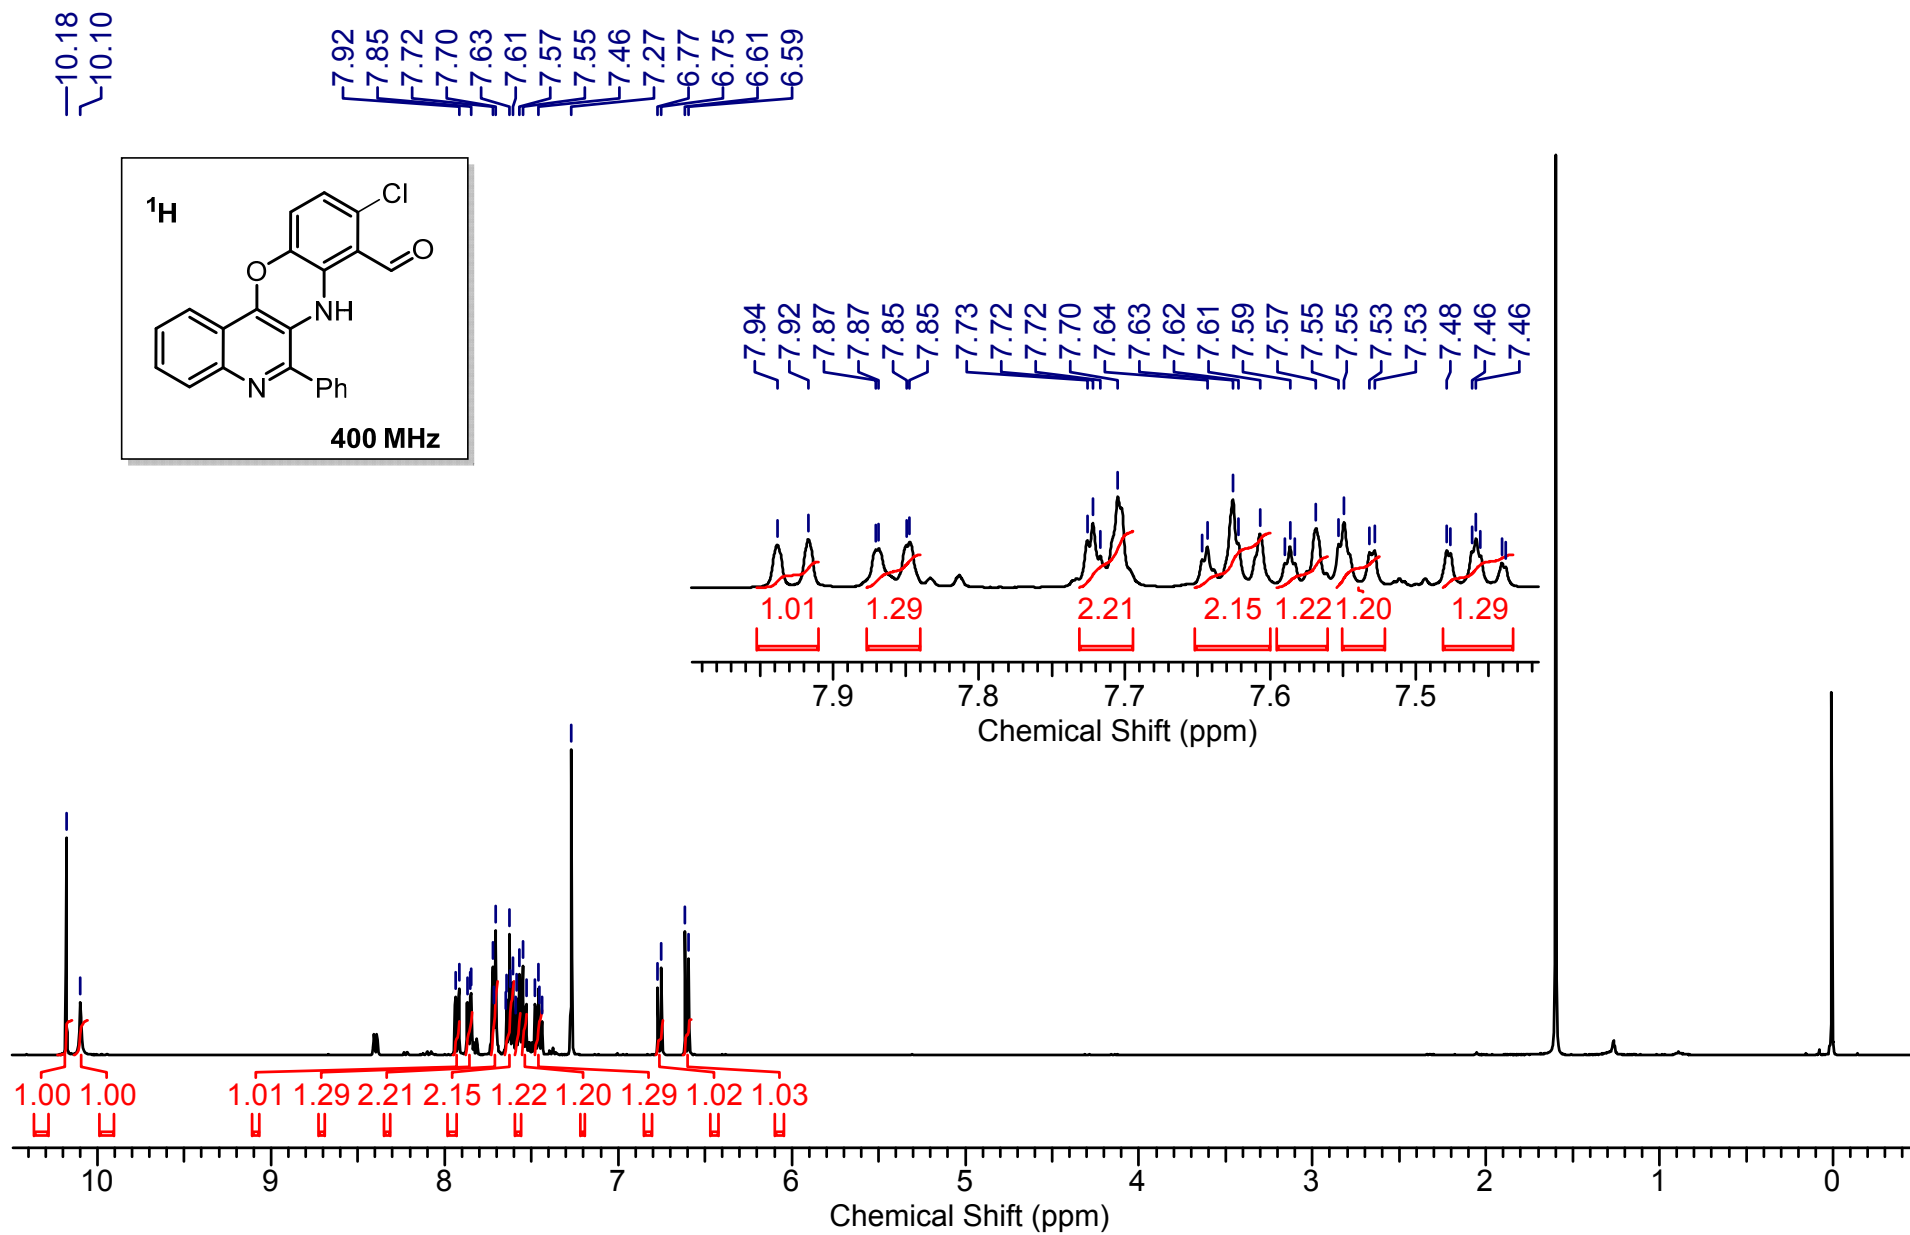

# 3ah

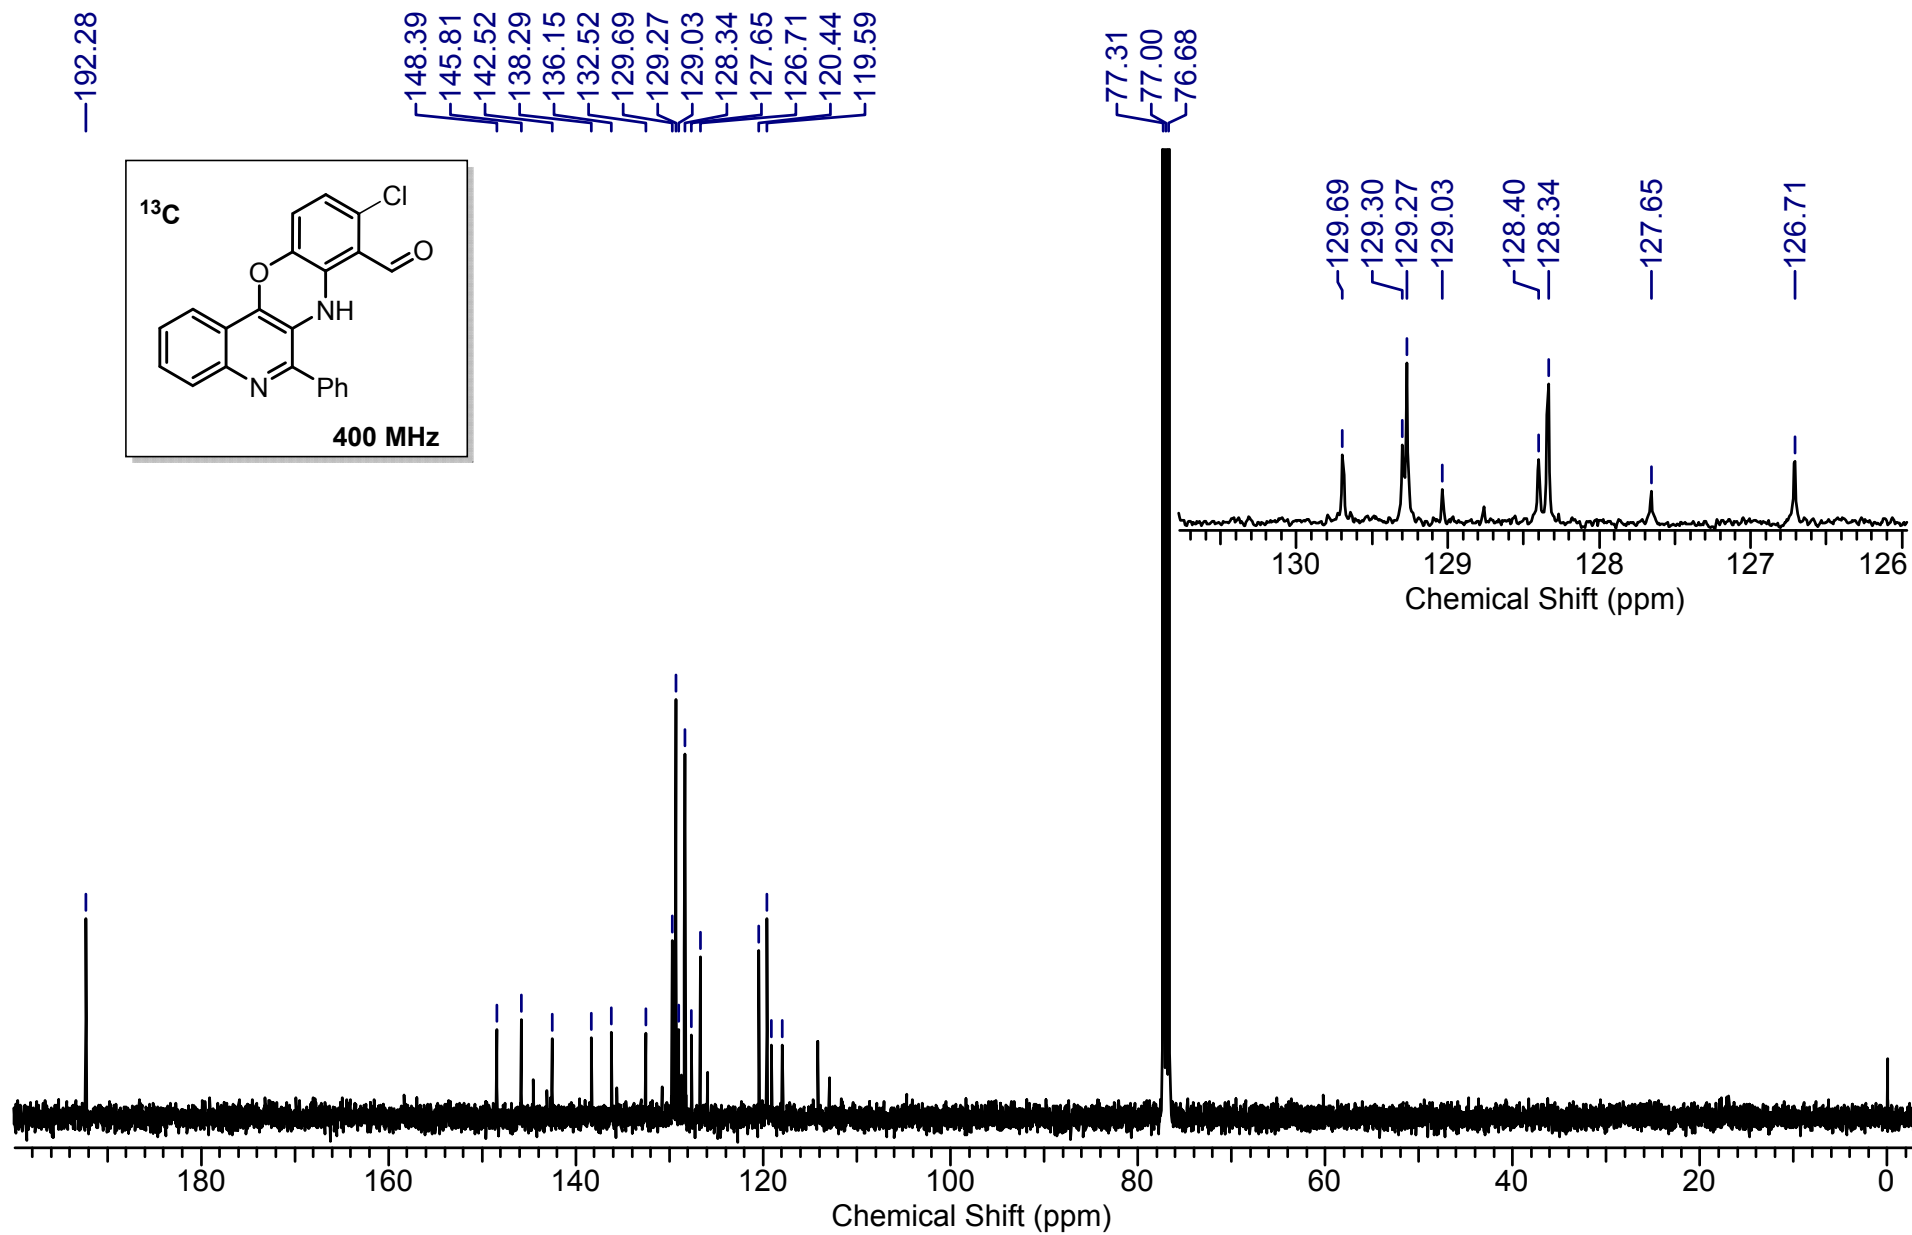

3ah

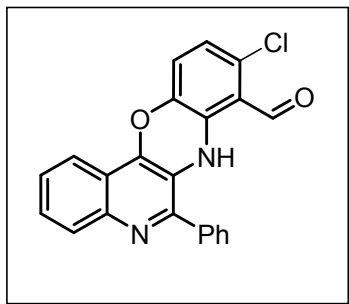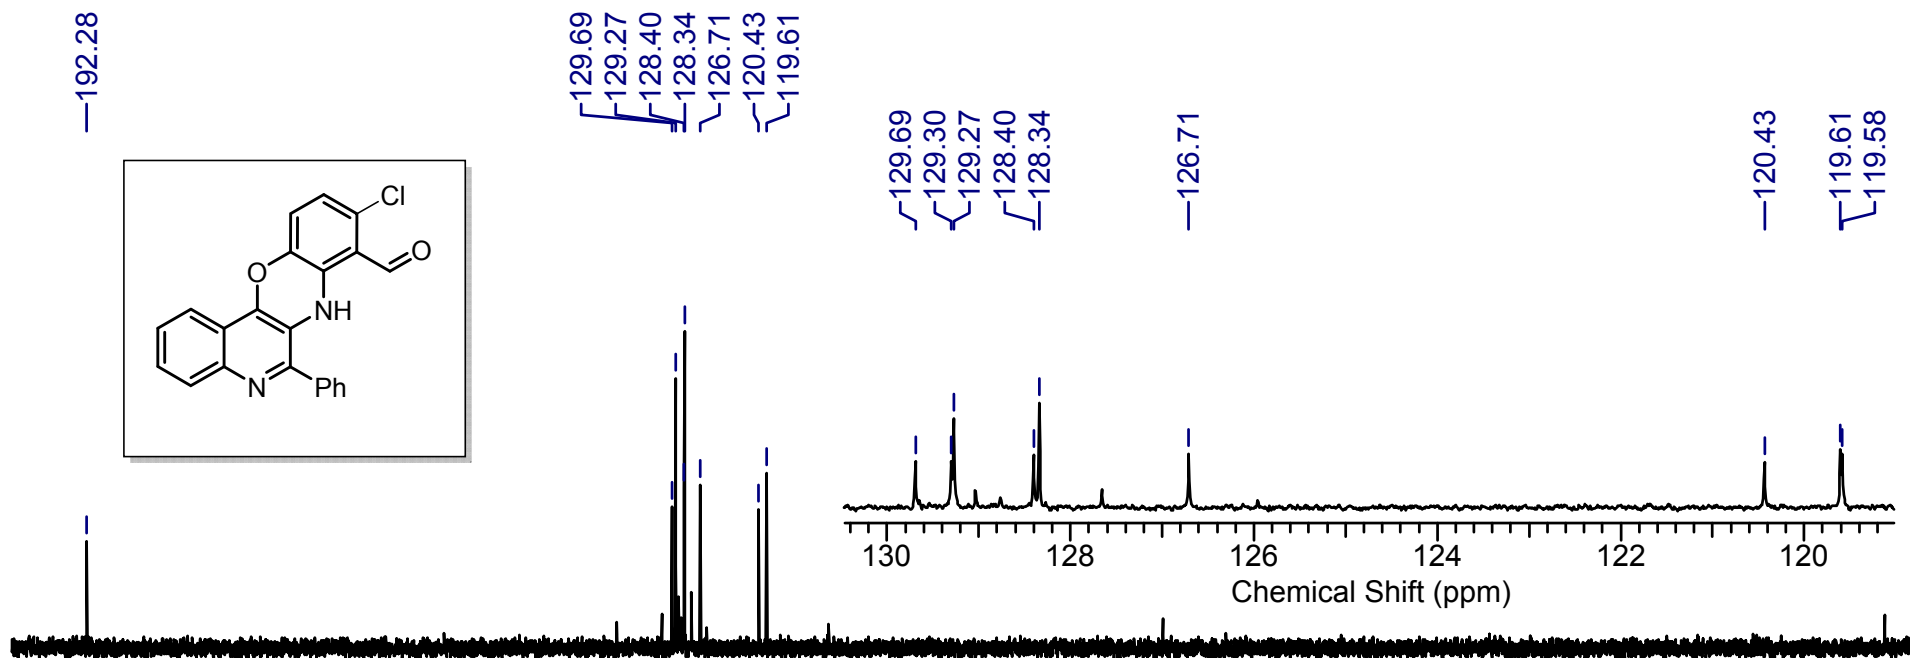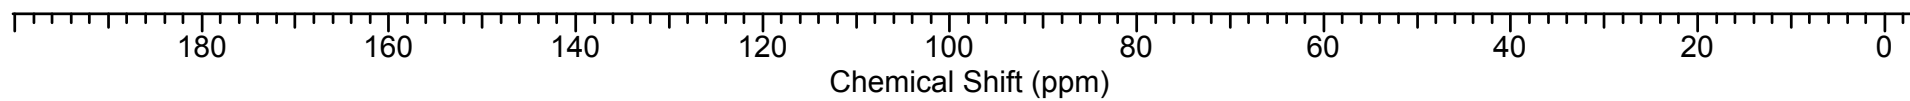

# 3ah

SH-610 #483 RT: 2.56 AV: 1 NL: 5.76E7  
T: FTMS + p ESI Full ms [100.0000-1500.0000]

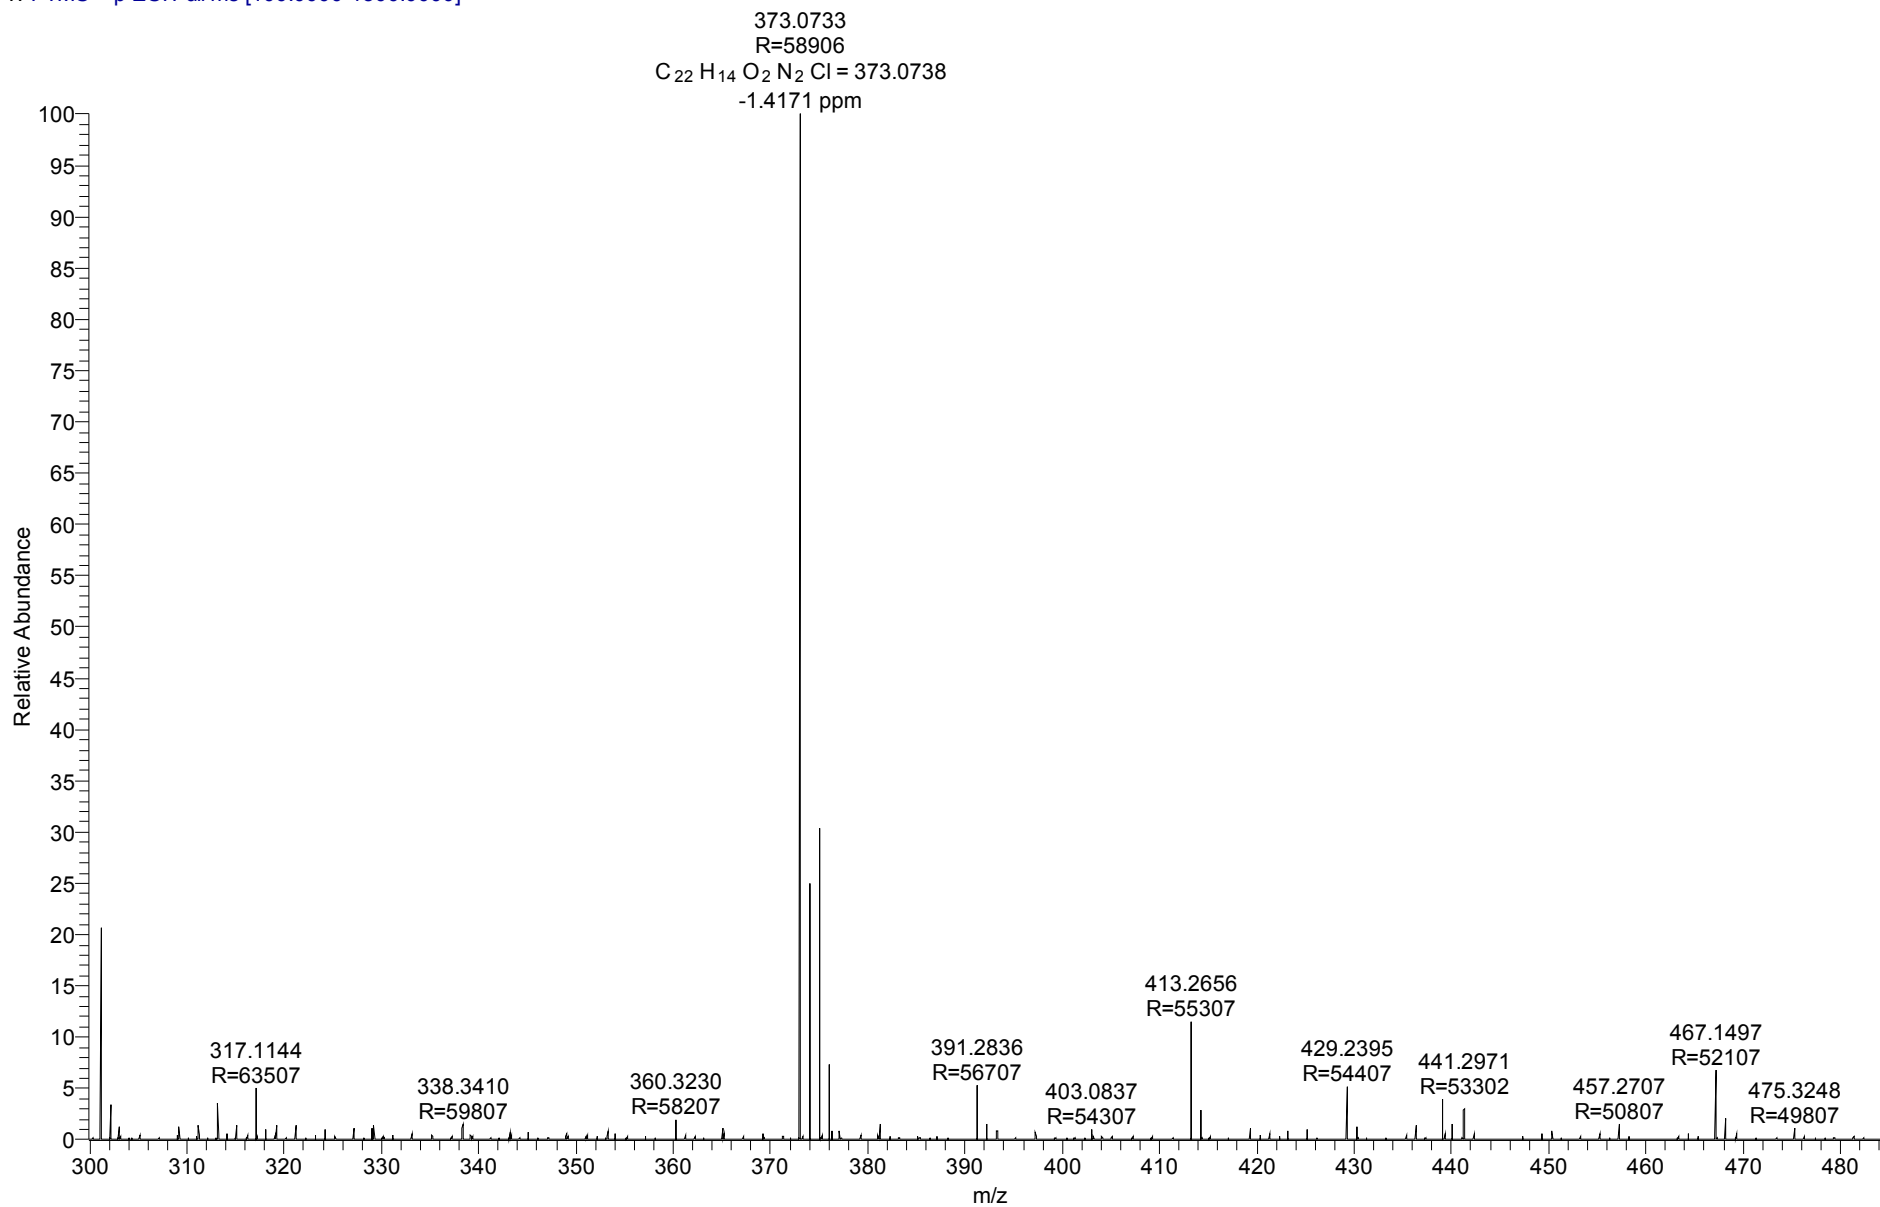

# 3ai

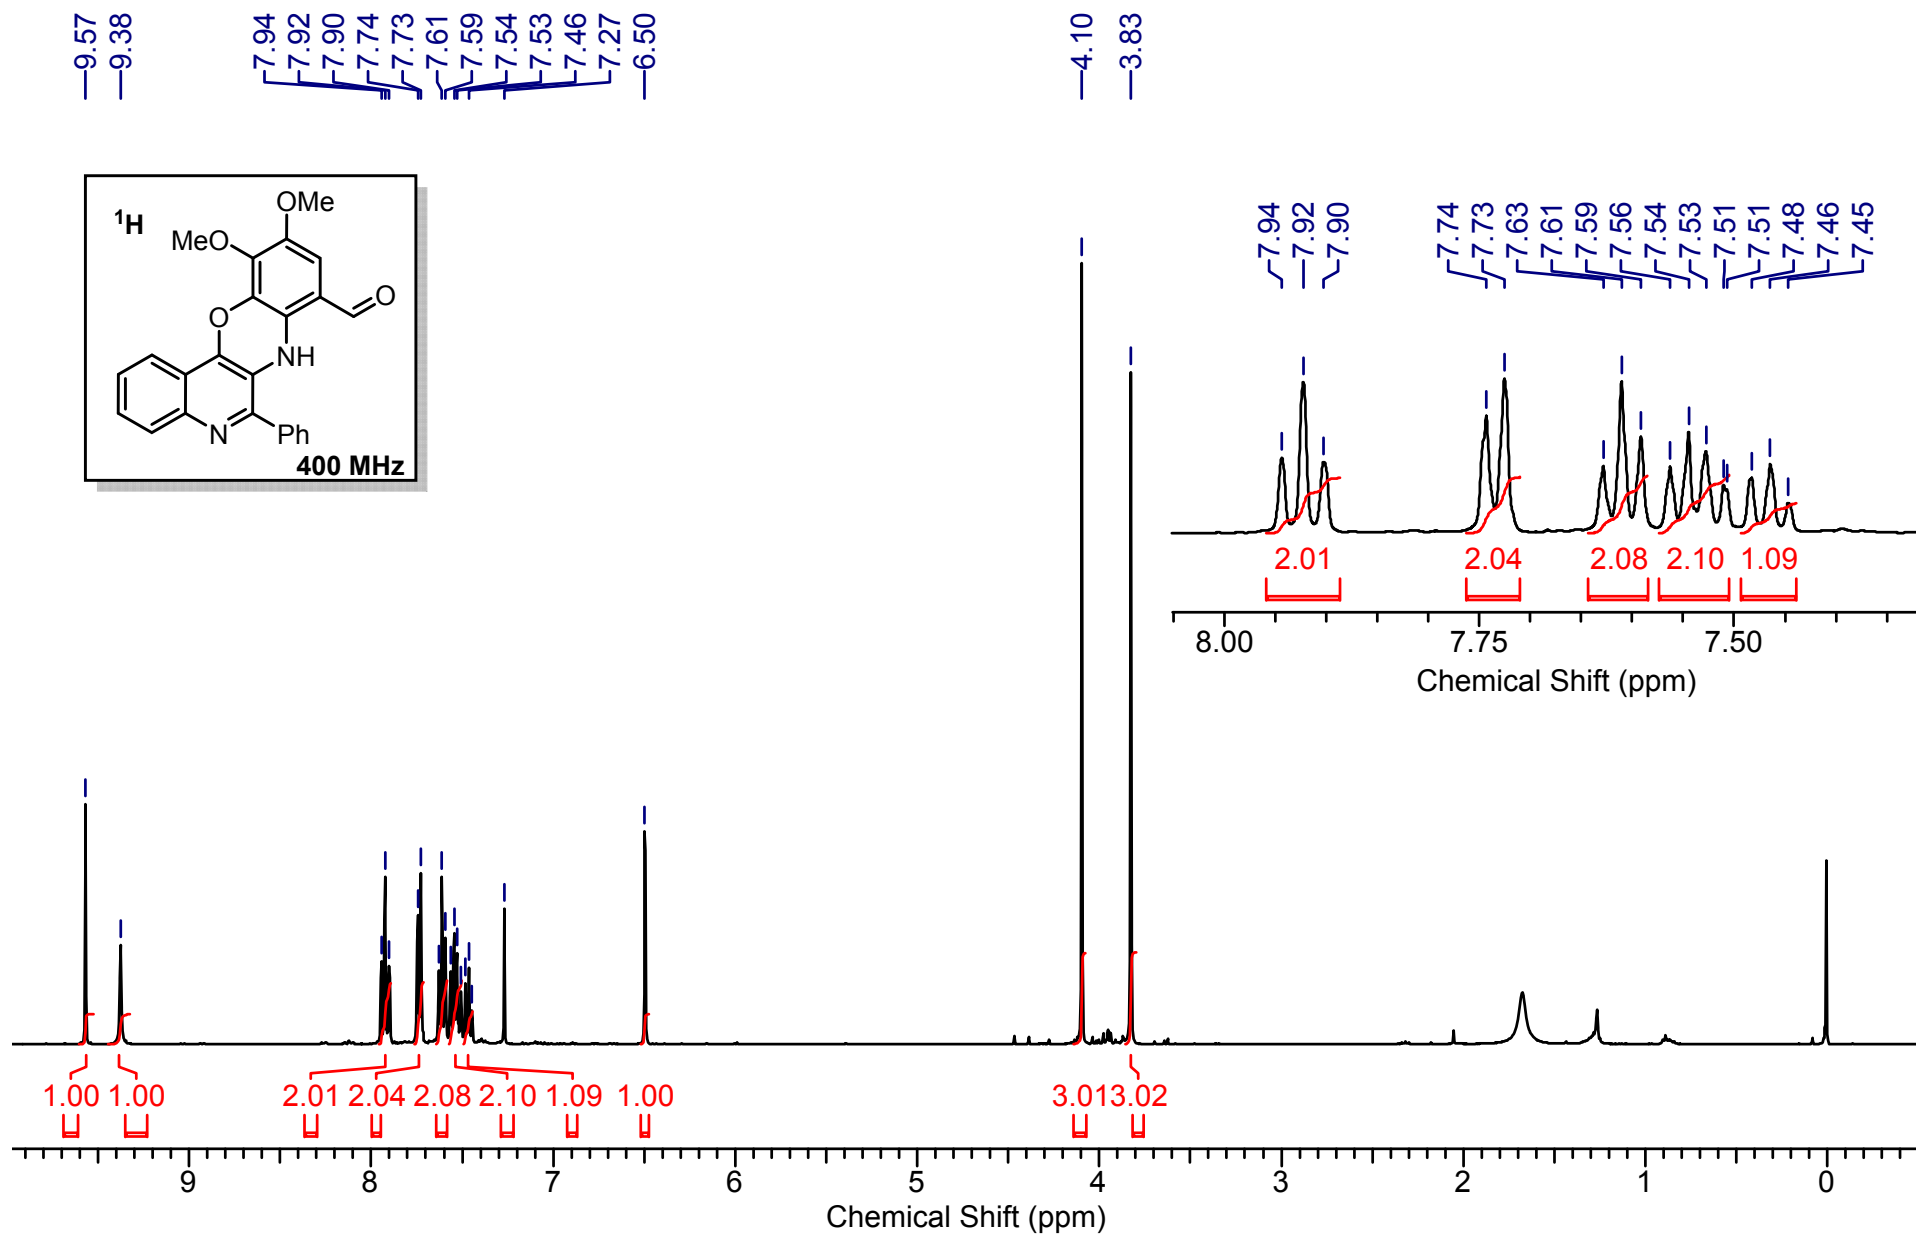

# 3ai

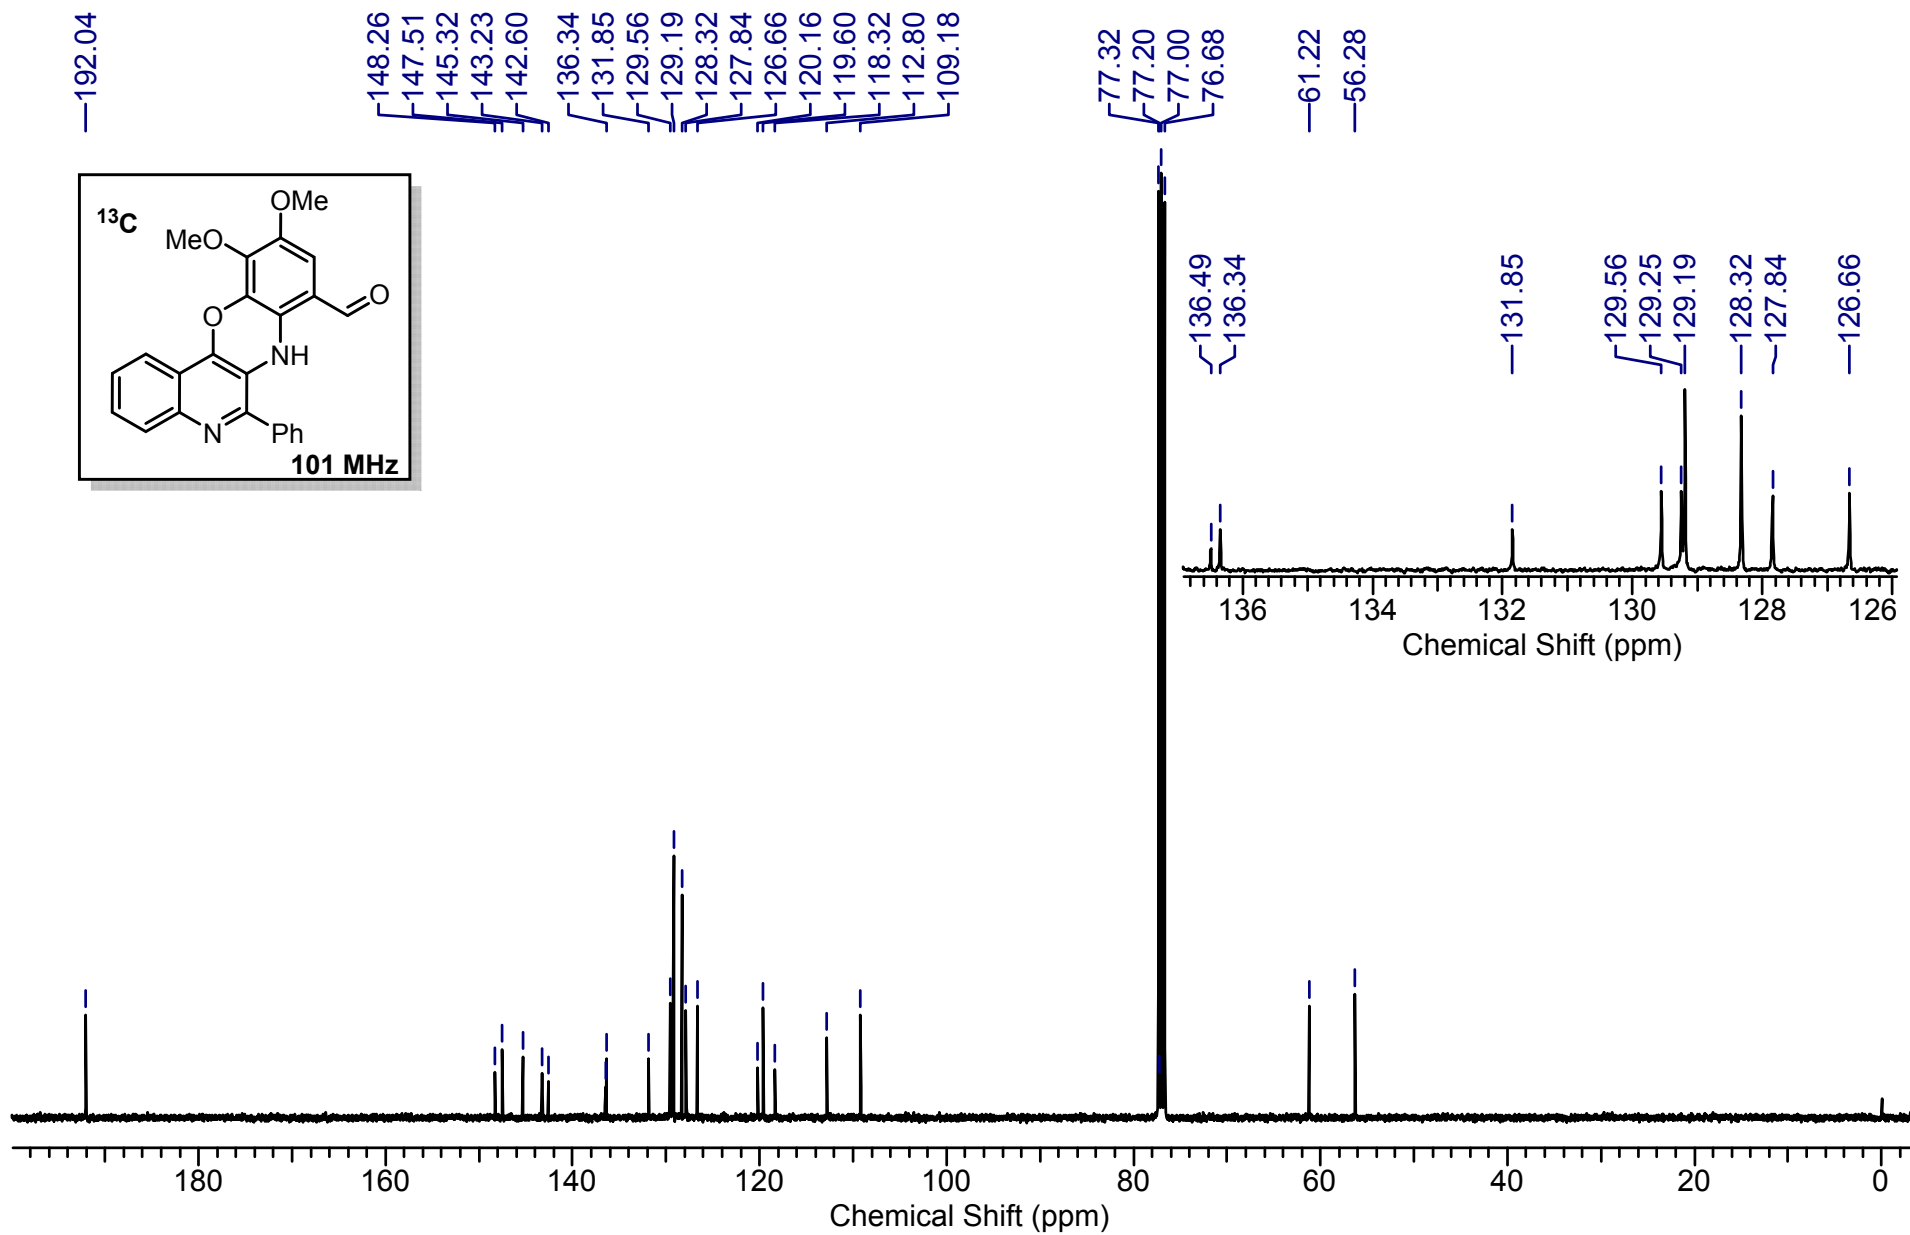

3ai

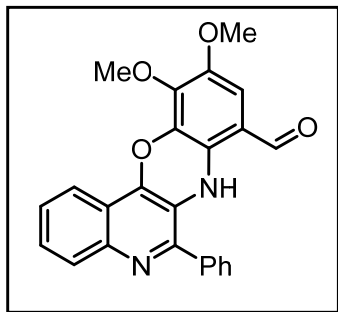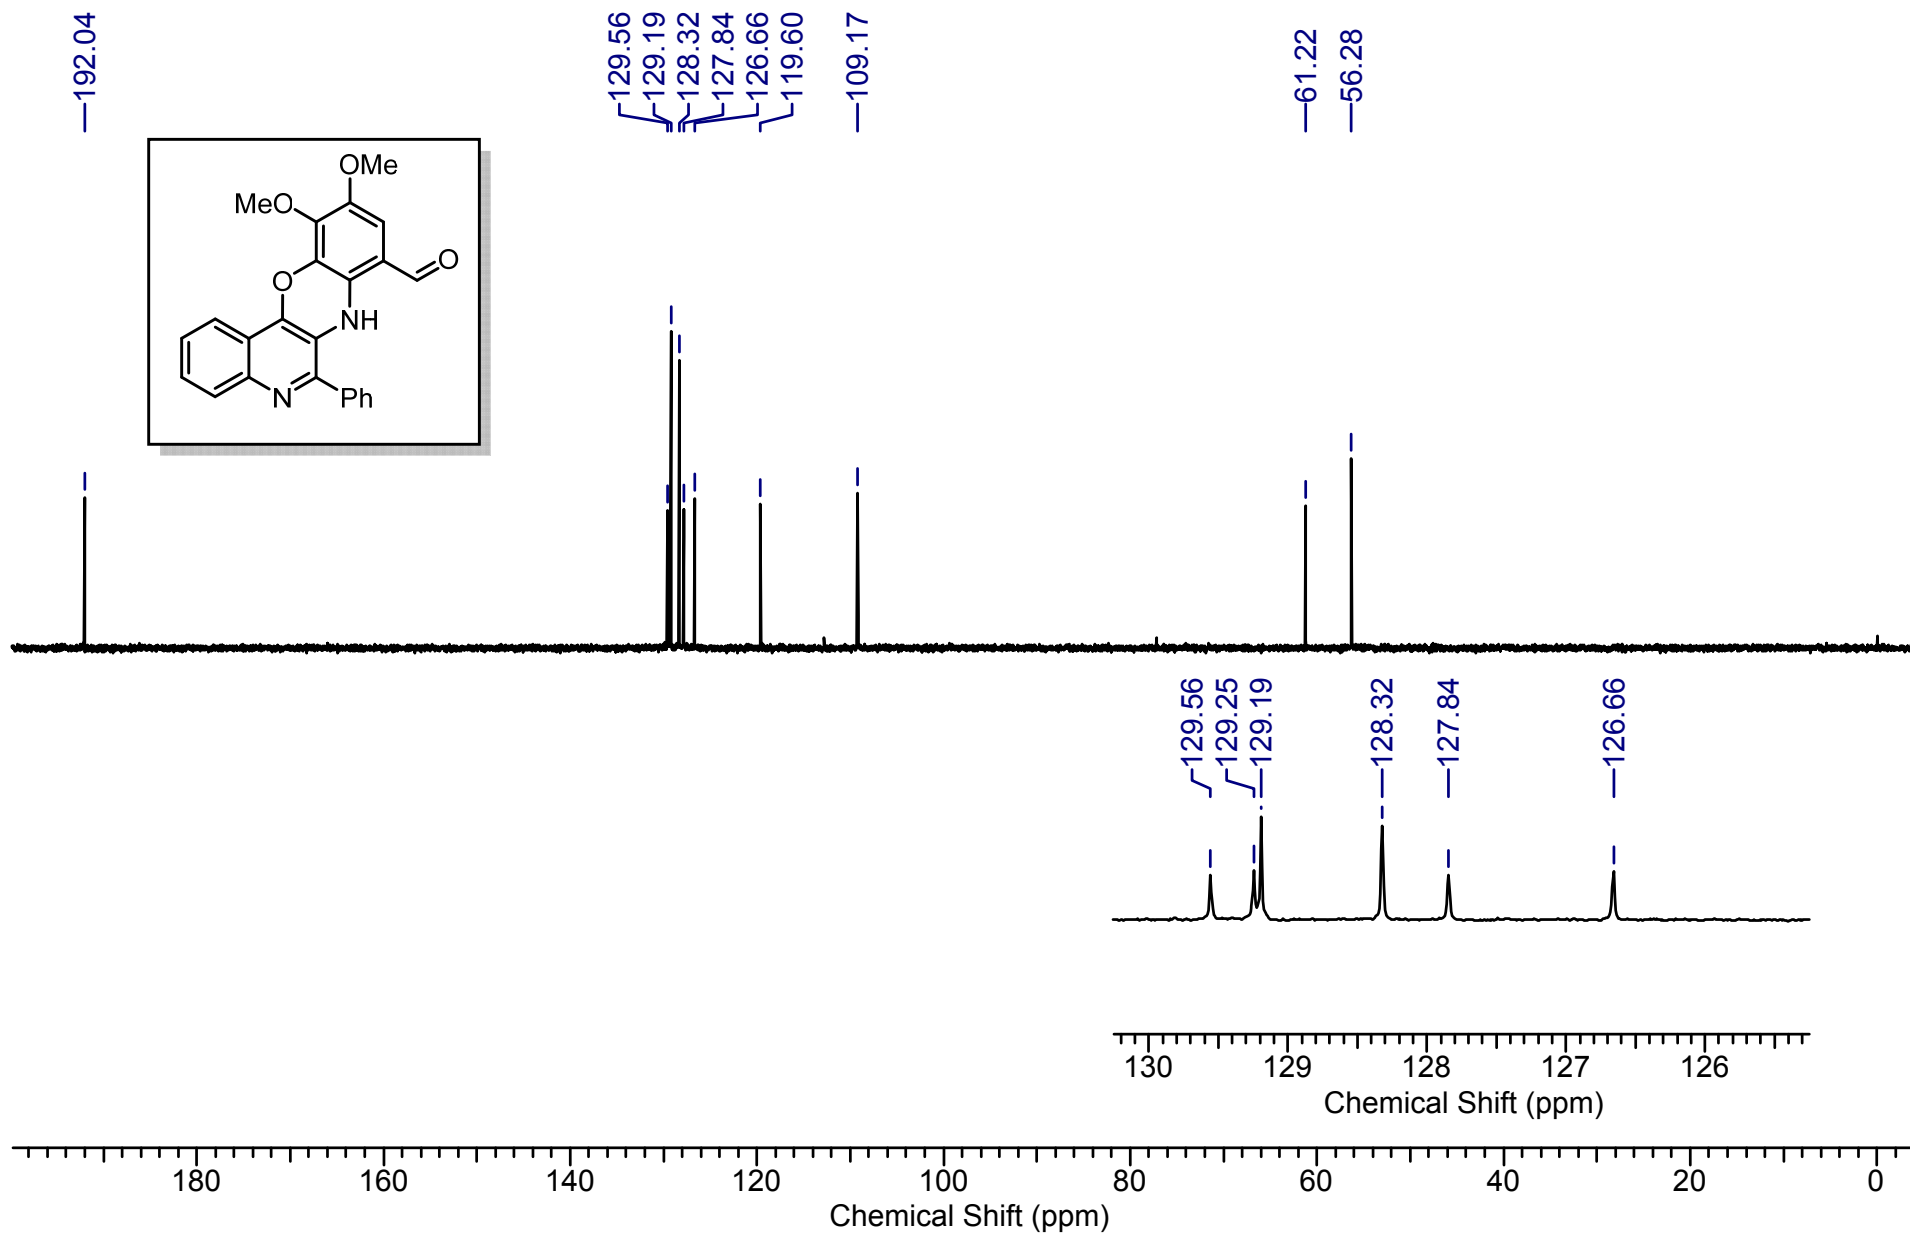



# 3ai

SH-607 #264 RT: 1.40 AV: 1 NL: 9.75E7  
T: FTMS + p ESI Full ms [100.0000-1500.0000]

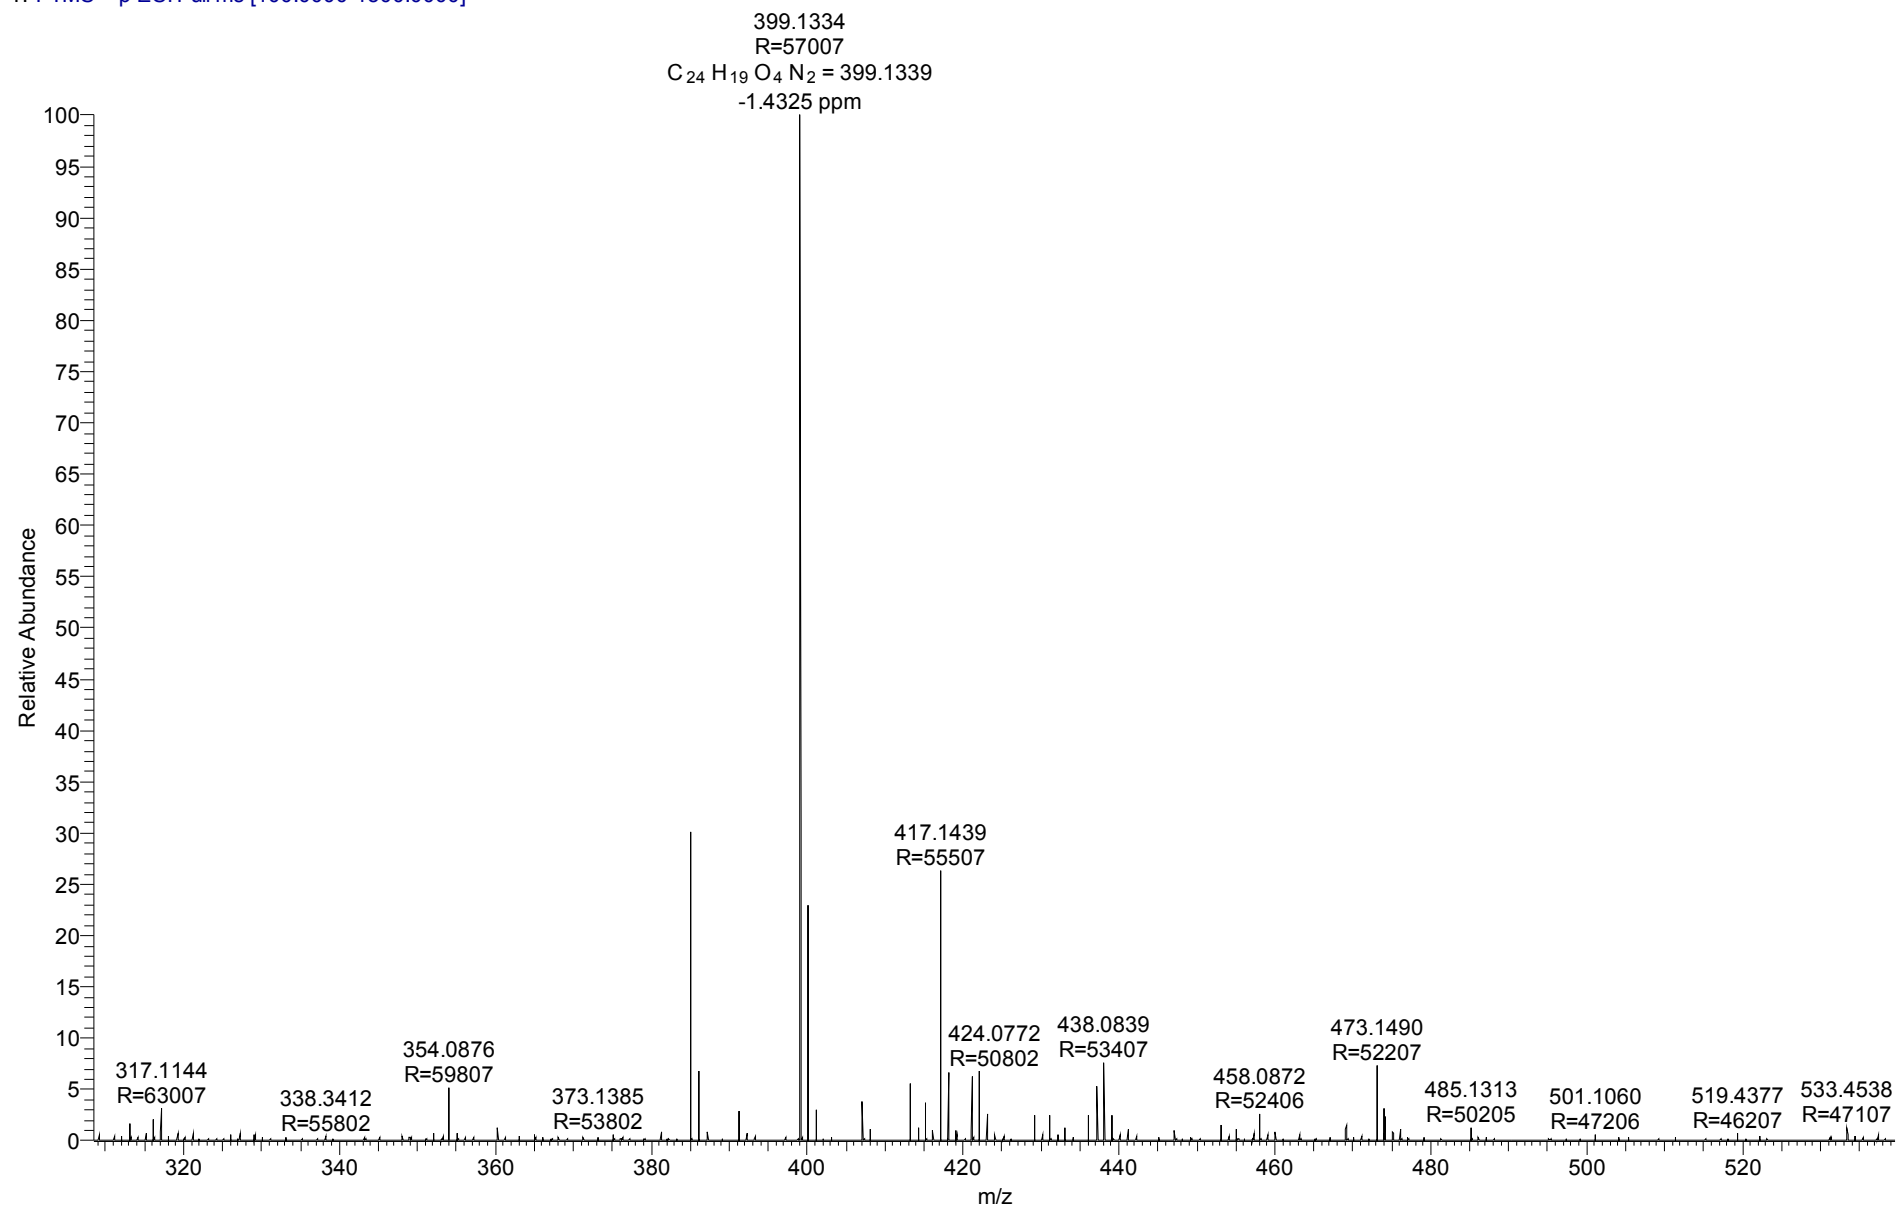

# 3fa

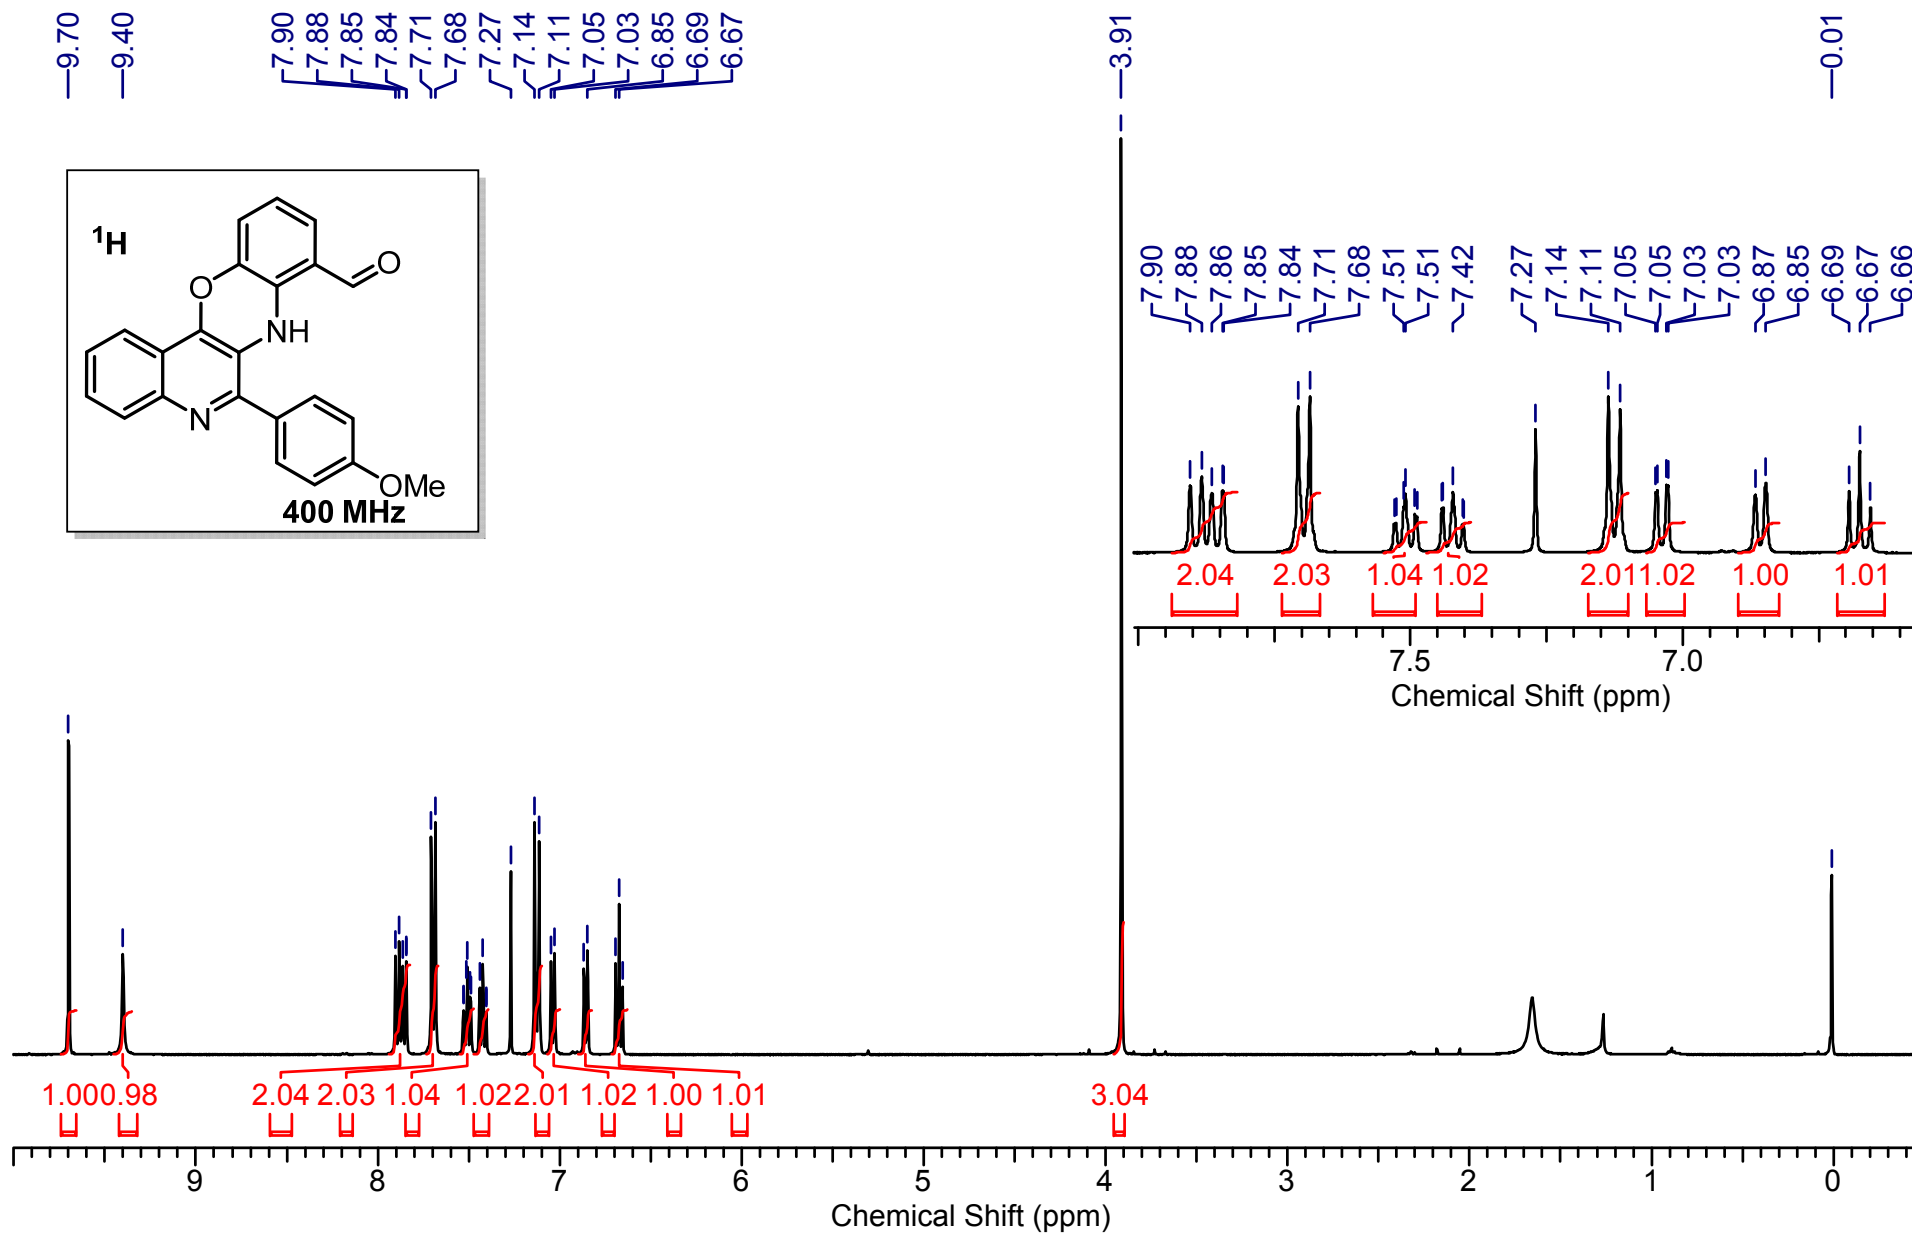

# 3fa

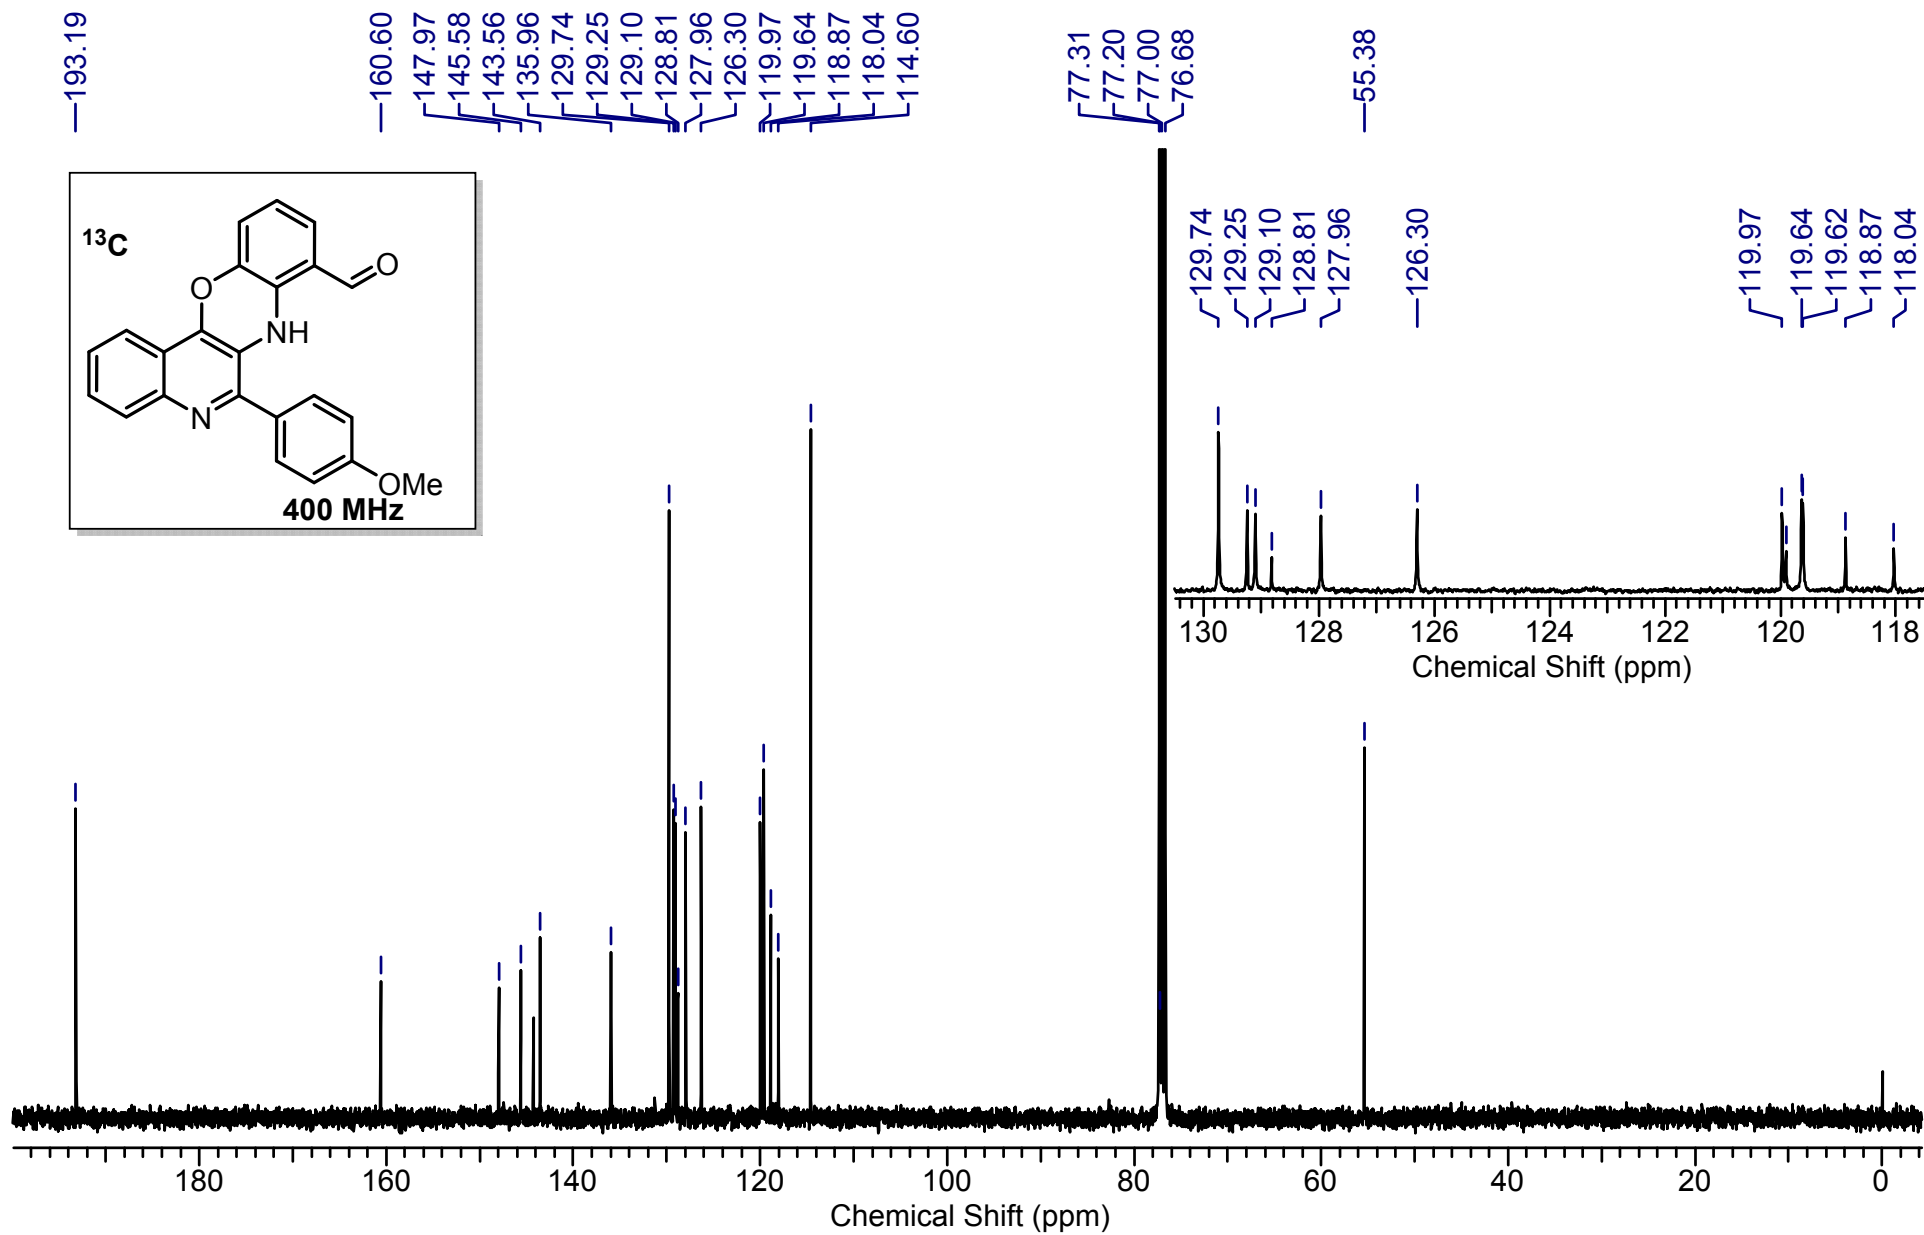

3fa

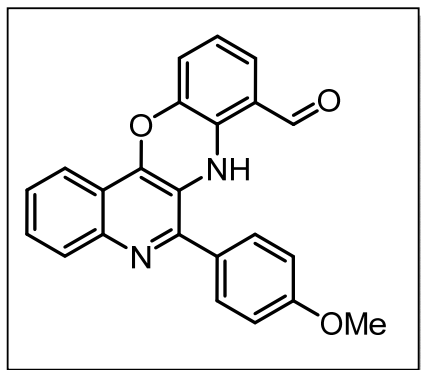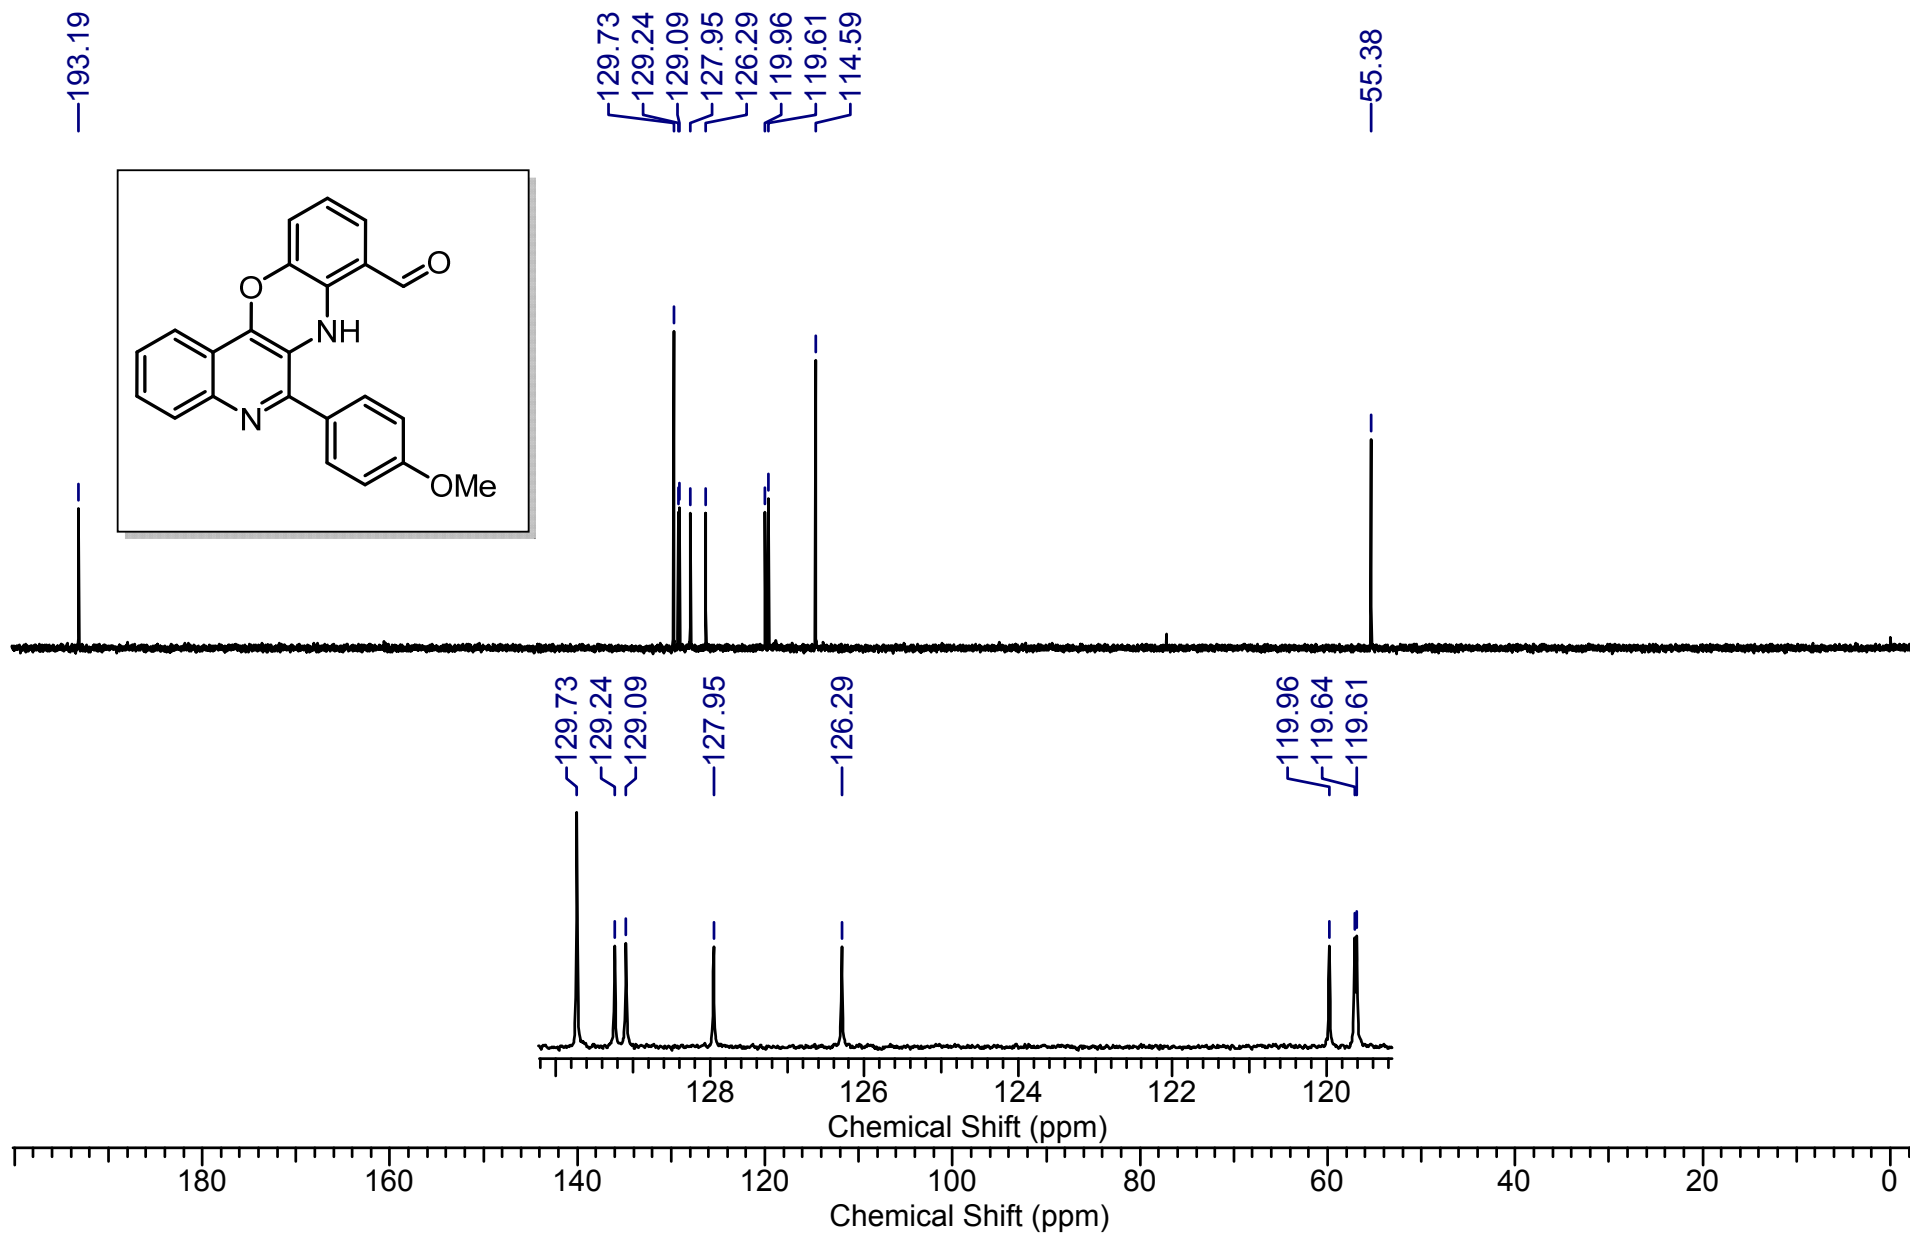

# 3fa

SH-618 #377 RT: 1.99 AV: 1 NL: 5.54E7  
T: FTMS + p ESI Full ms [100.0000-1500.0000]

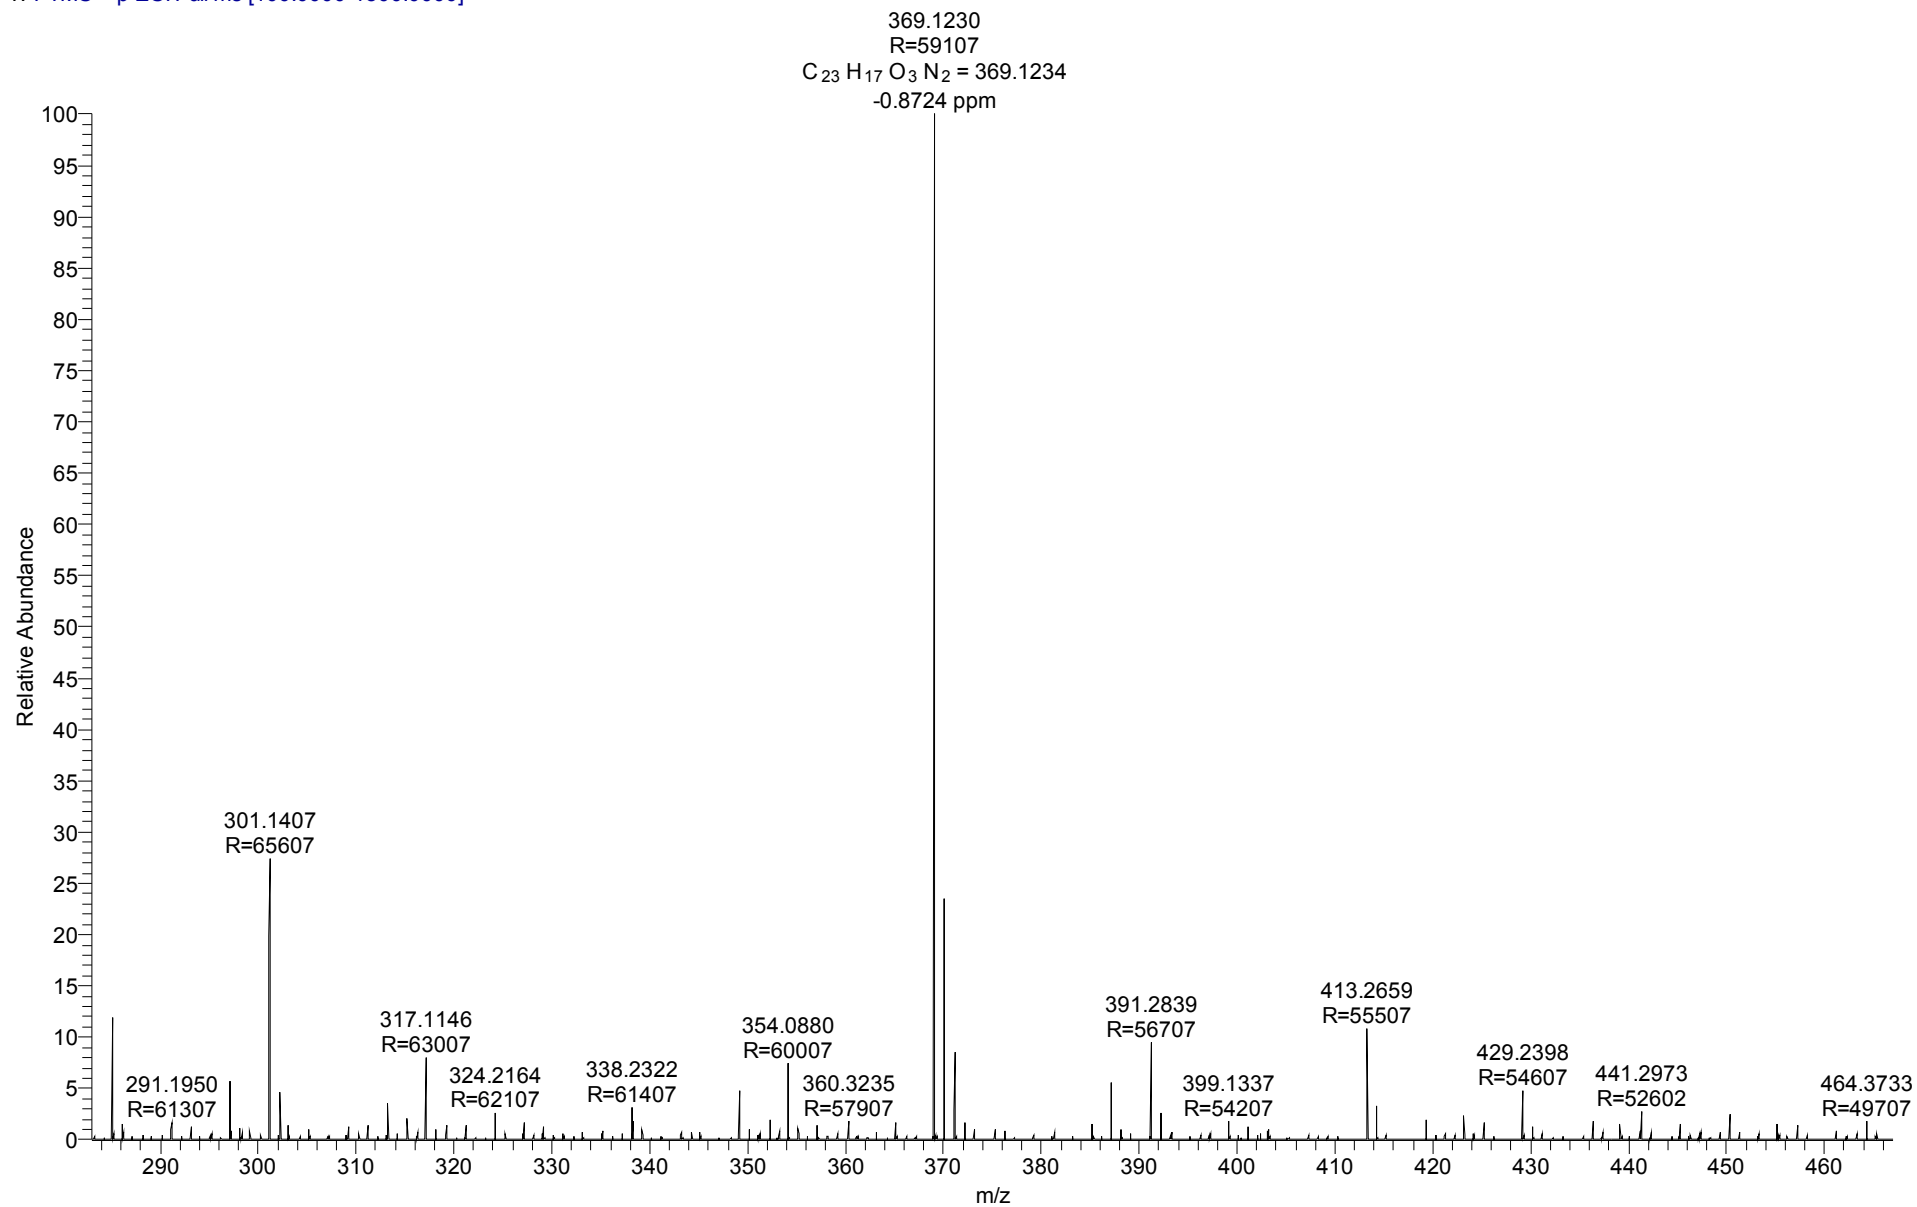

# 3ga

9.71  
9.43

7.92  
7.90  
7.86  
7.70  
7.68  
7.64  
7.62  
7.44  
7.27  
7.06  
7.04  
6.86  
6.69  
6.69

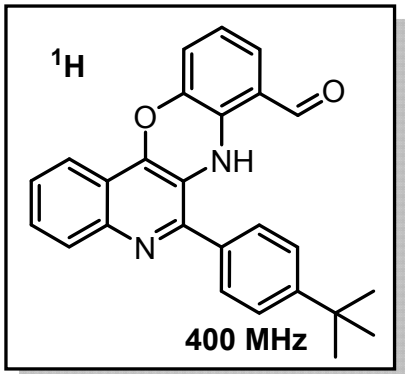

7.92  
7.90  
7.88  
7.86  
7.70  
7.68  
7.64  
7.62  
7.52  
7.52  
7.50  
7.46  
7.44  
7.44  
7.42  
7.27  
7.06  
7.04  
6.88  
6.86  
6.71  
6.71  
6.69  
6.69  
6.67

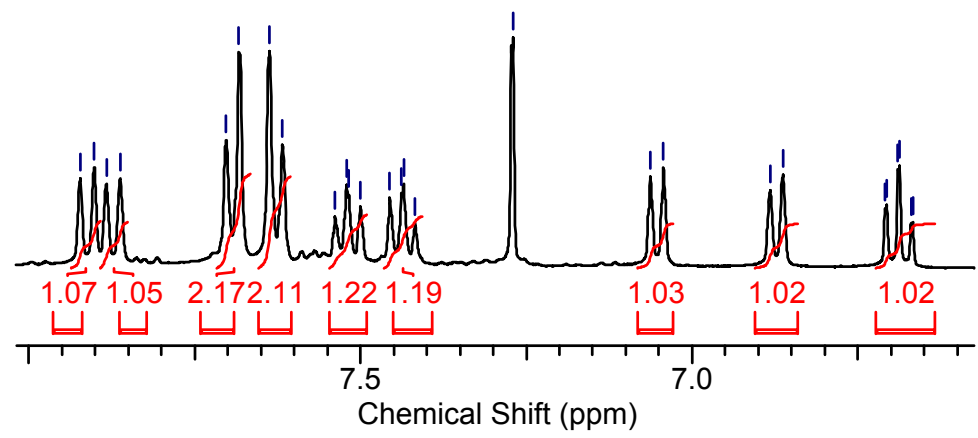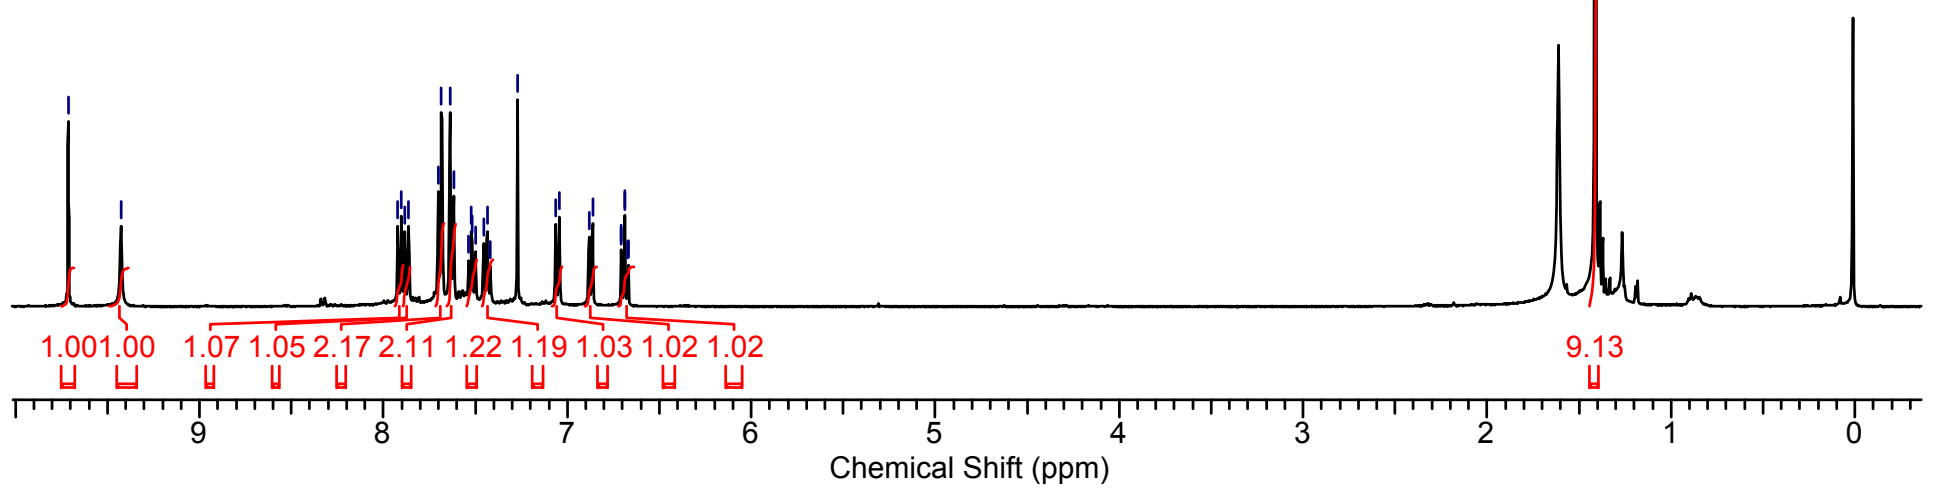

**3ga**

—193.16

—152.67  
—148.20  
—145.64  
—143.59  
—135.95  
—133.58  
—129.30  
—127.96  
—126.39  
—126.17  
—119.97  
—119.66  
—119.63  
—118.91

—77.32  
—77.00  
—76.68

—34.85  
—31.29

—0.02

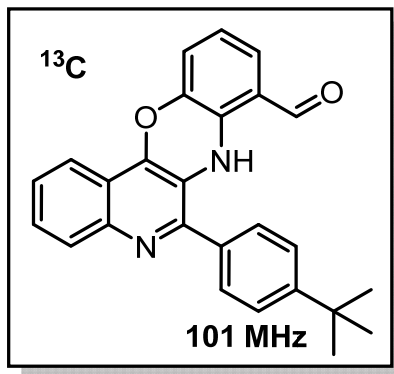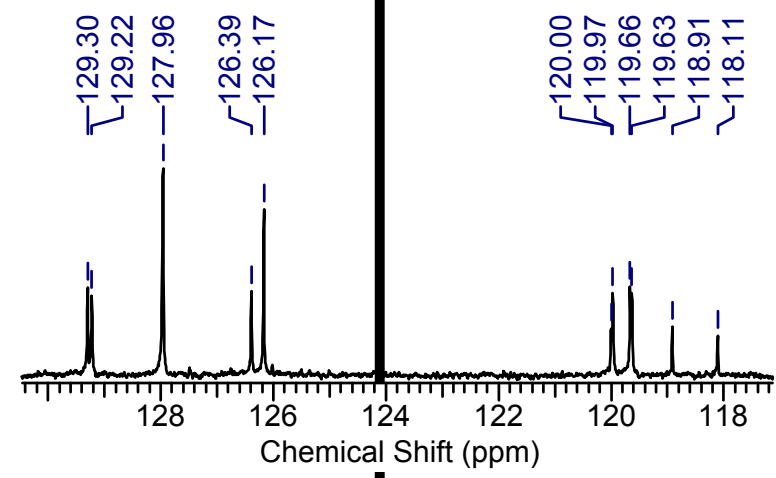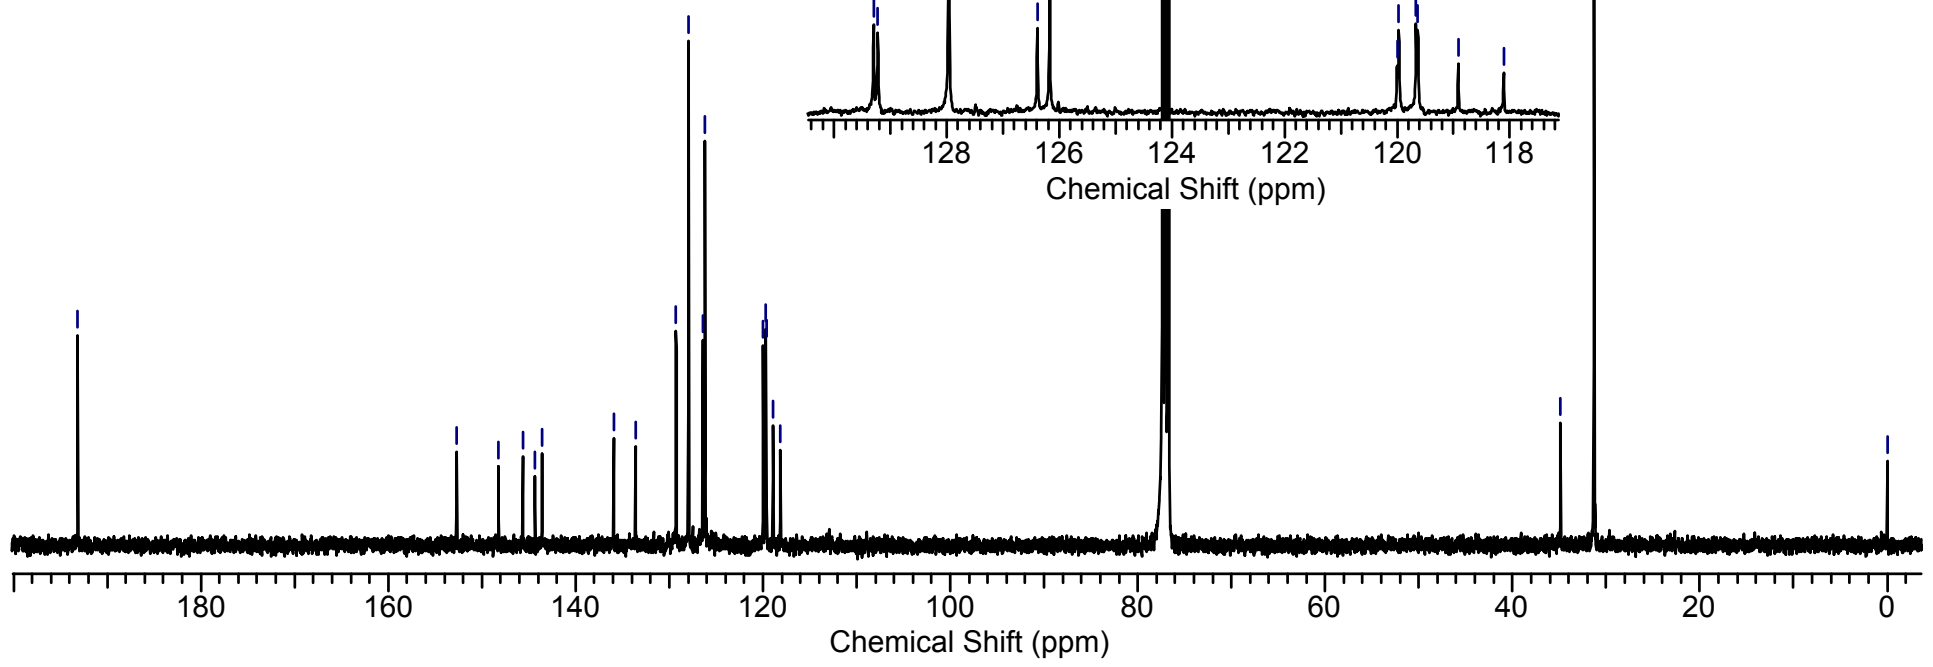

3ga

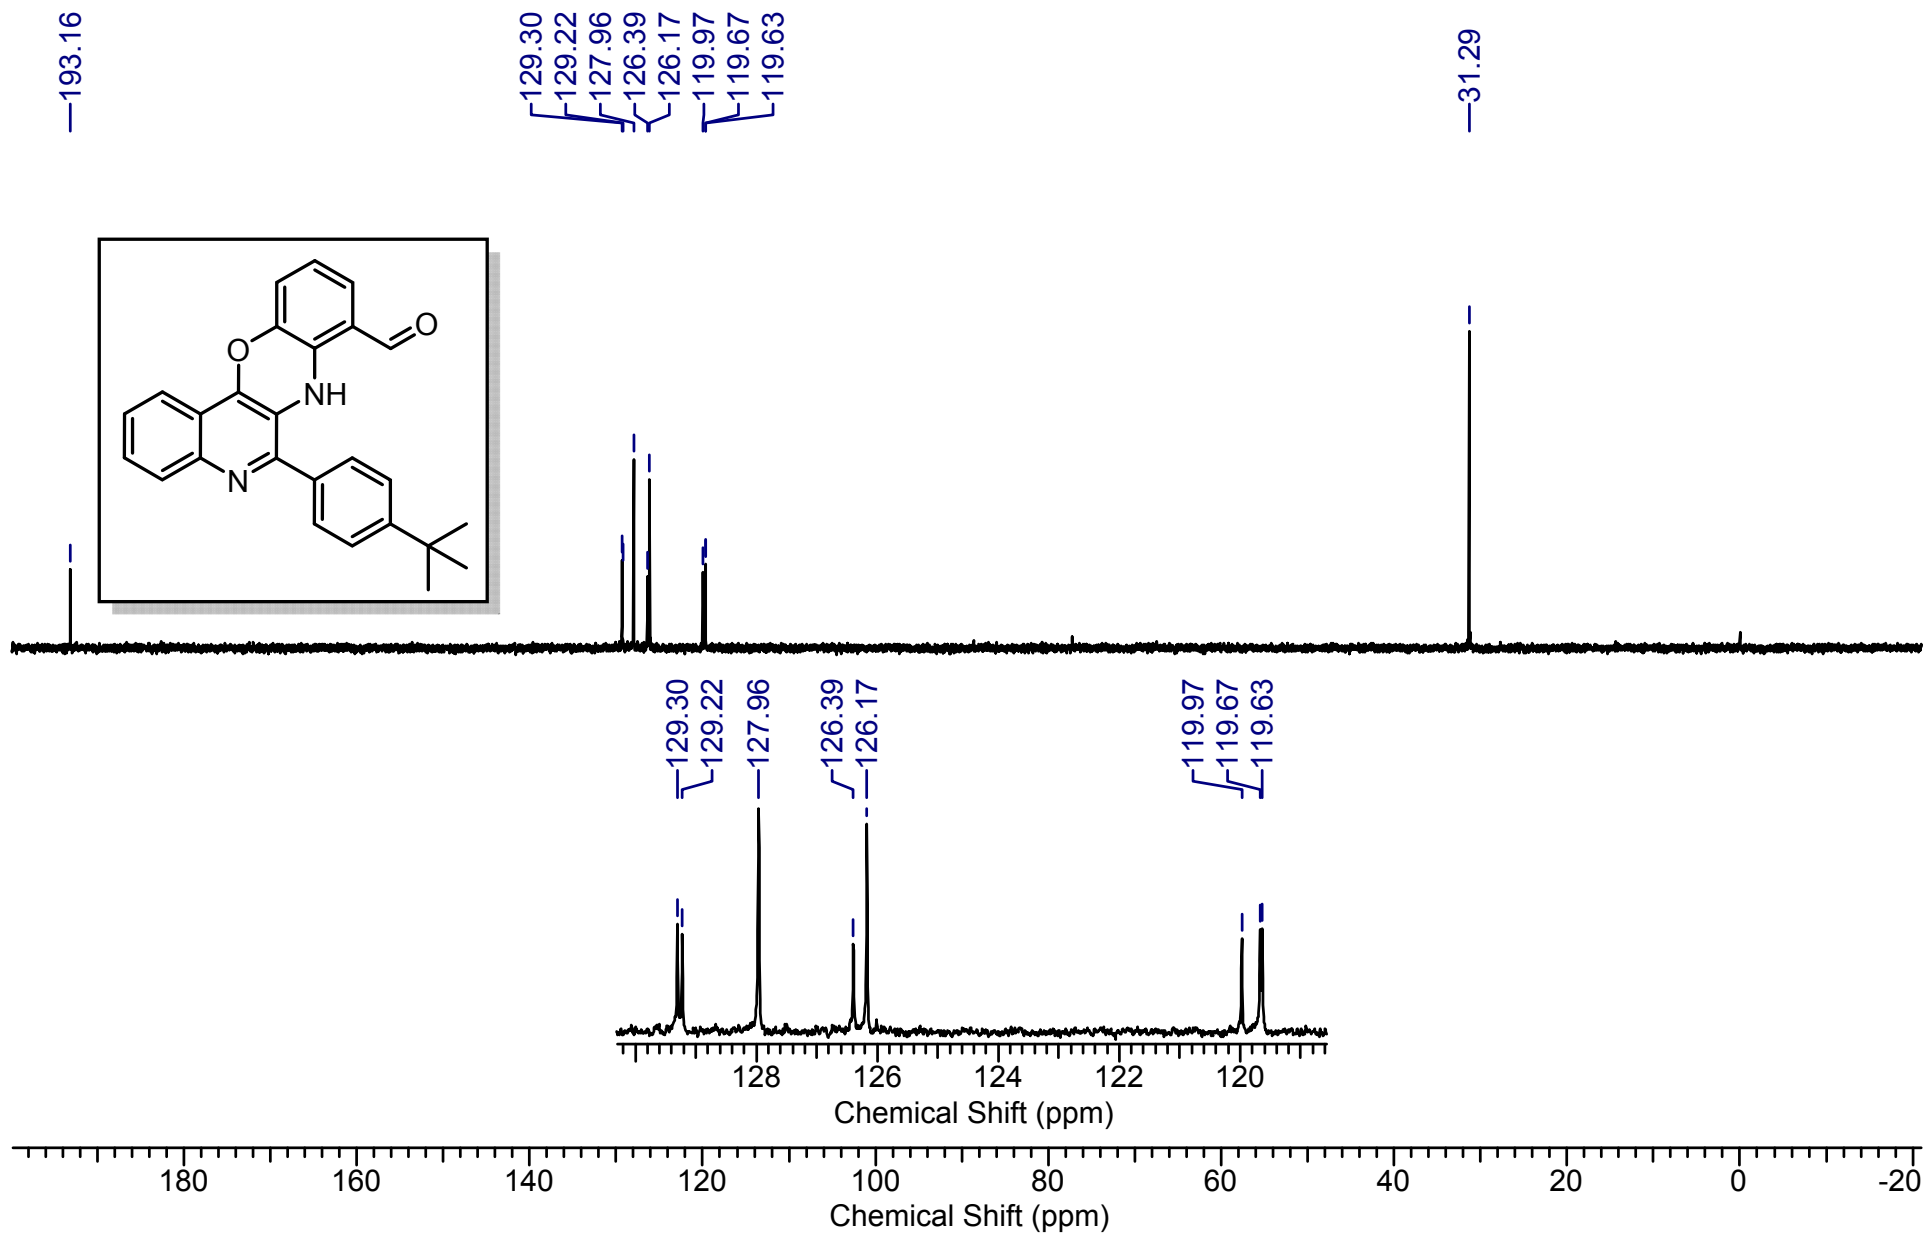



# 3ga

SH-634 #489 RT: 2.63 AV: 1 NL: 3.15E8  
T: FTMS + p ESI Full ms [100.0000-1500.0000]

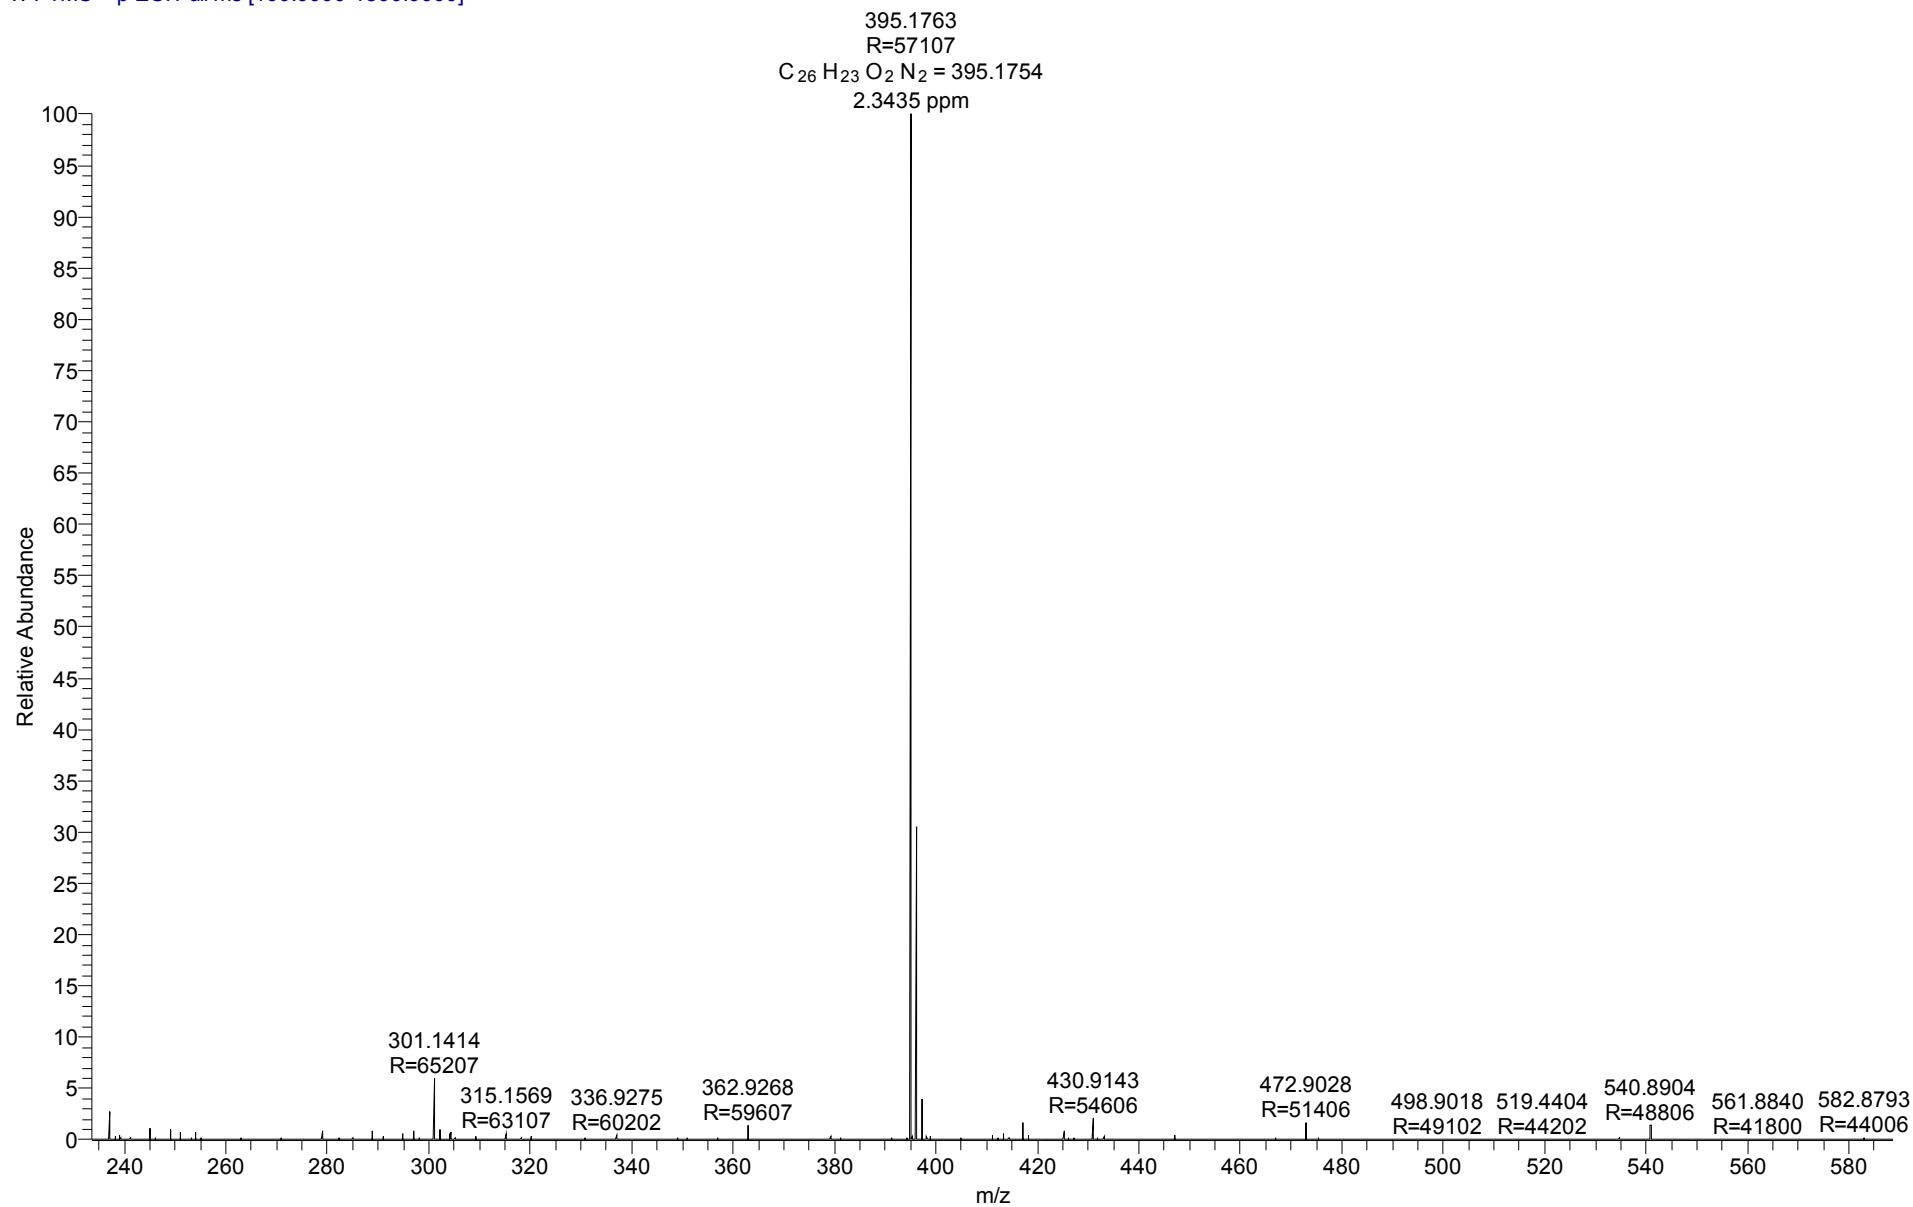

3ha

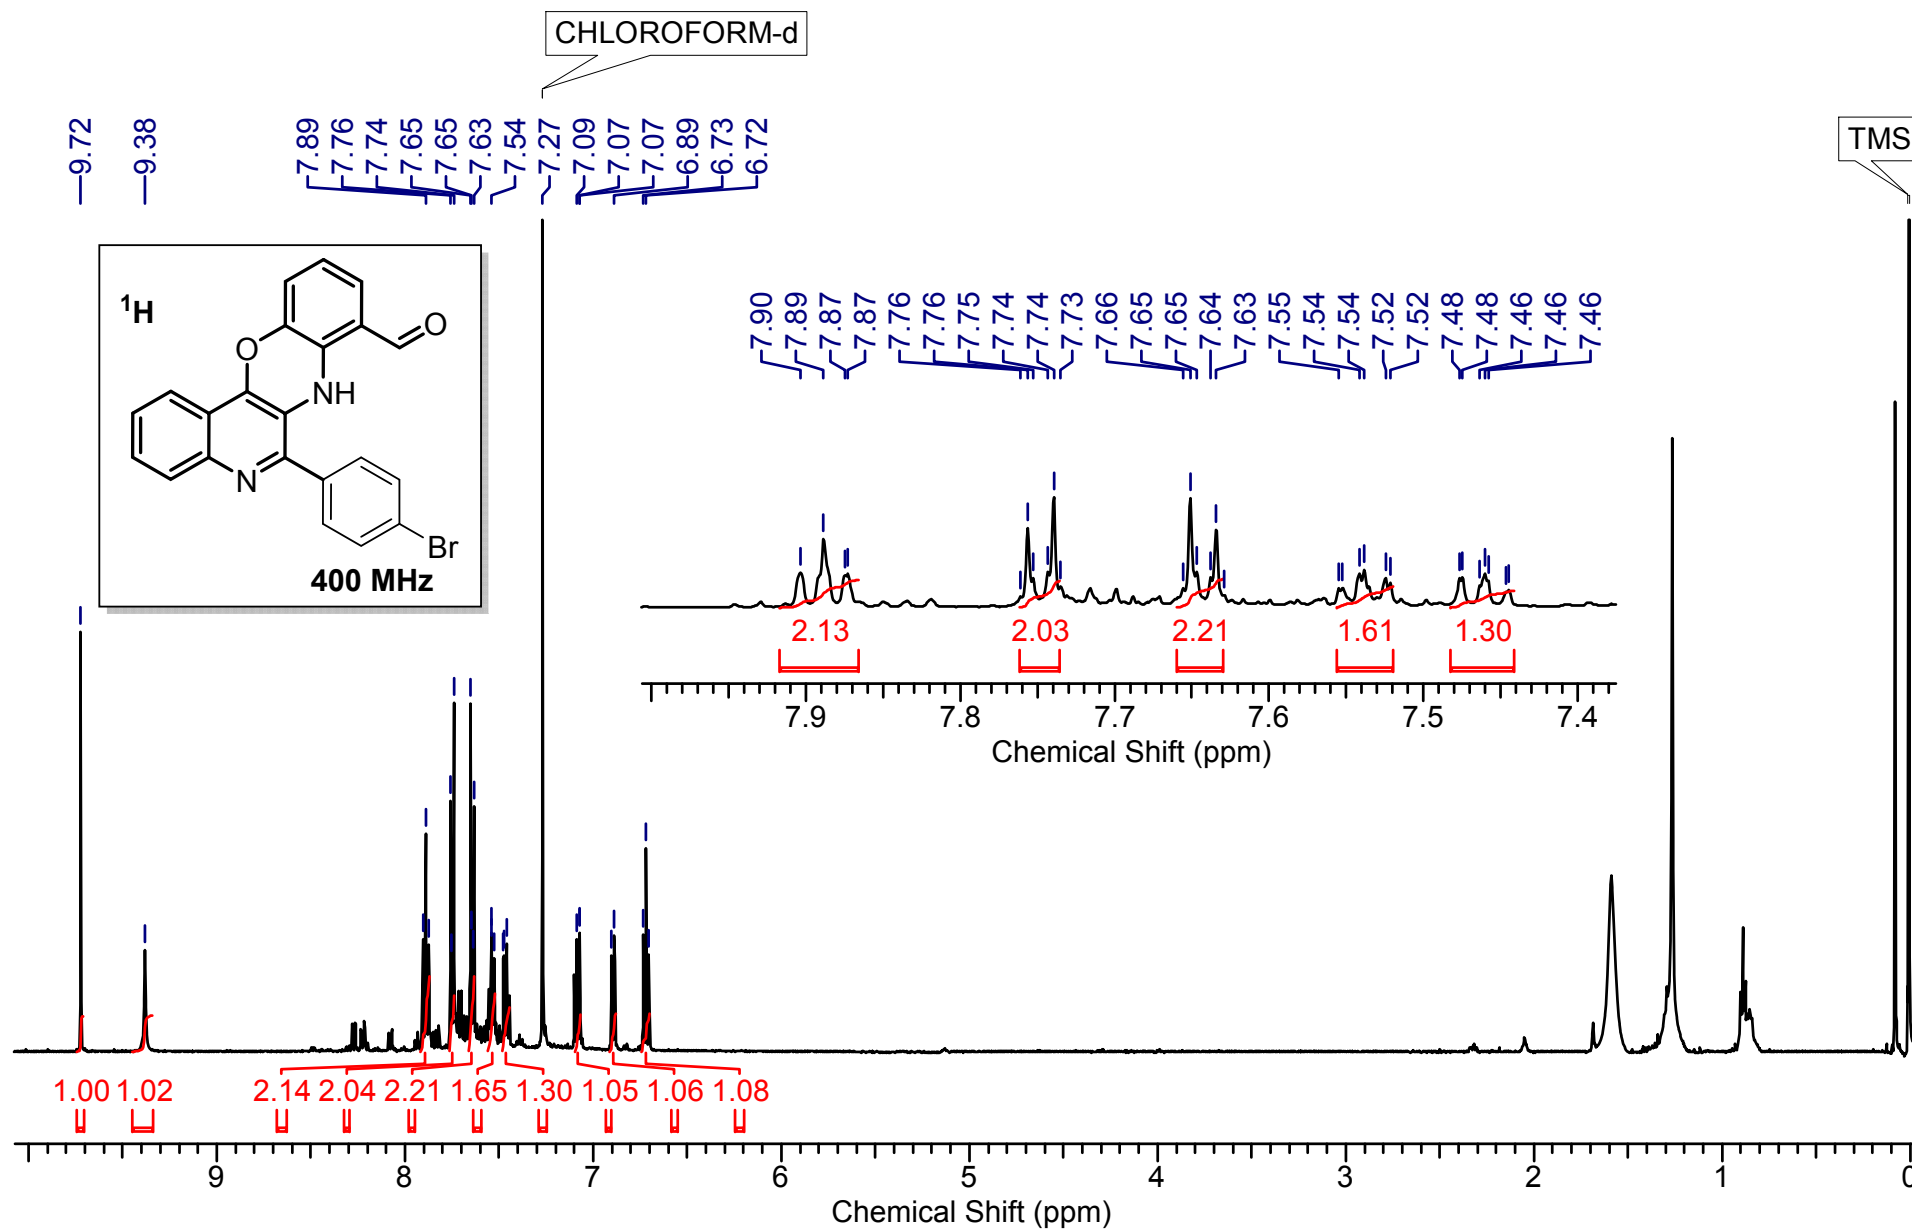

3ha

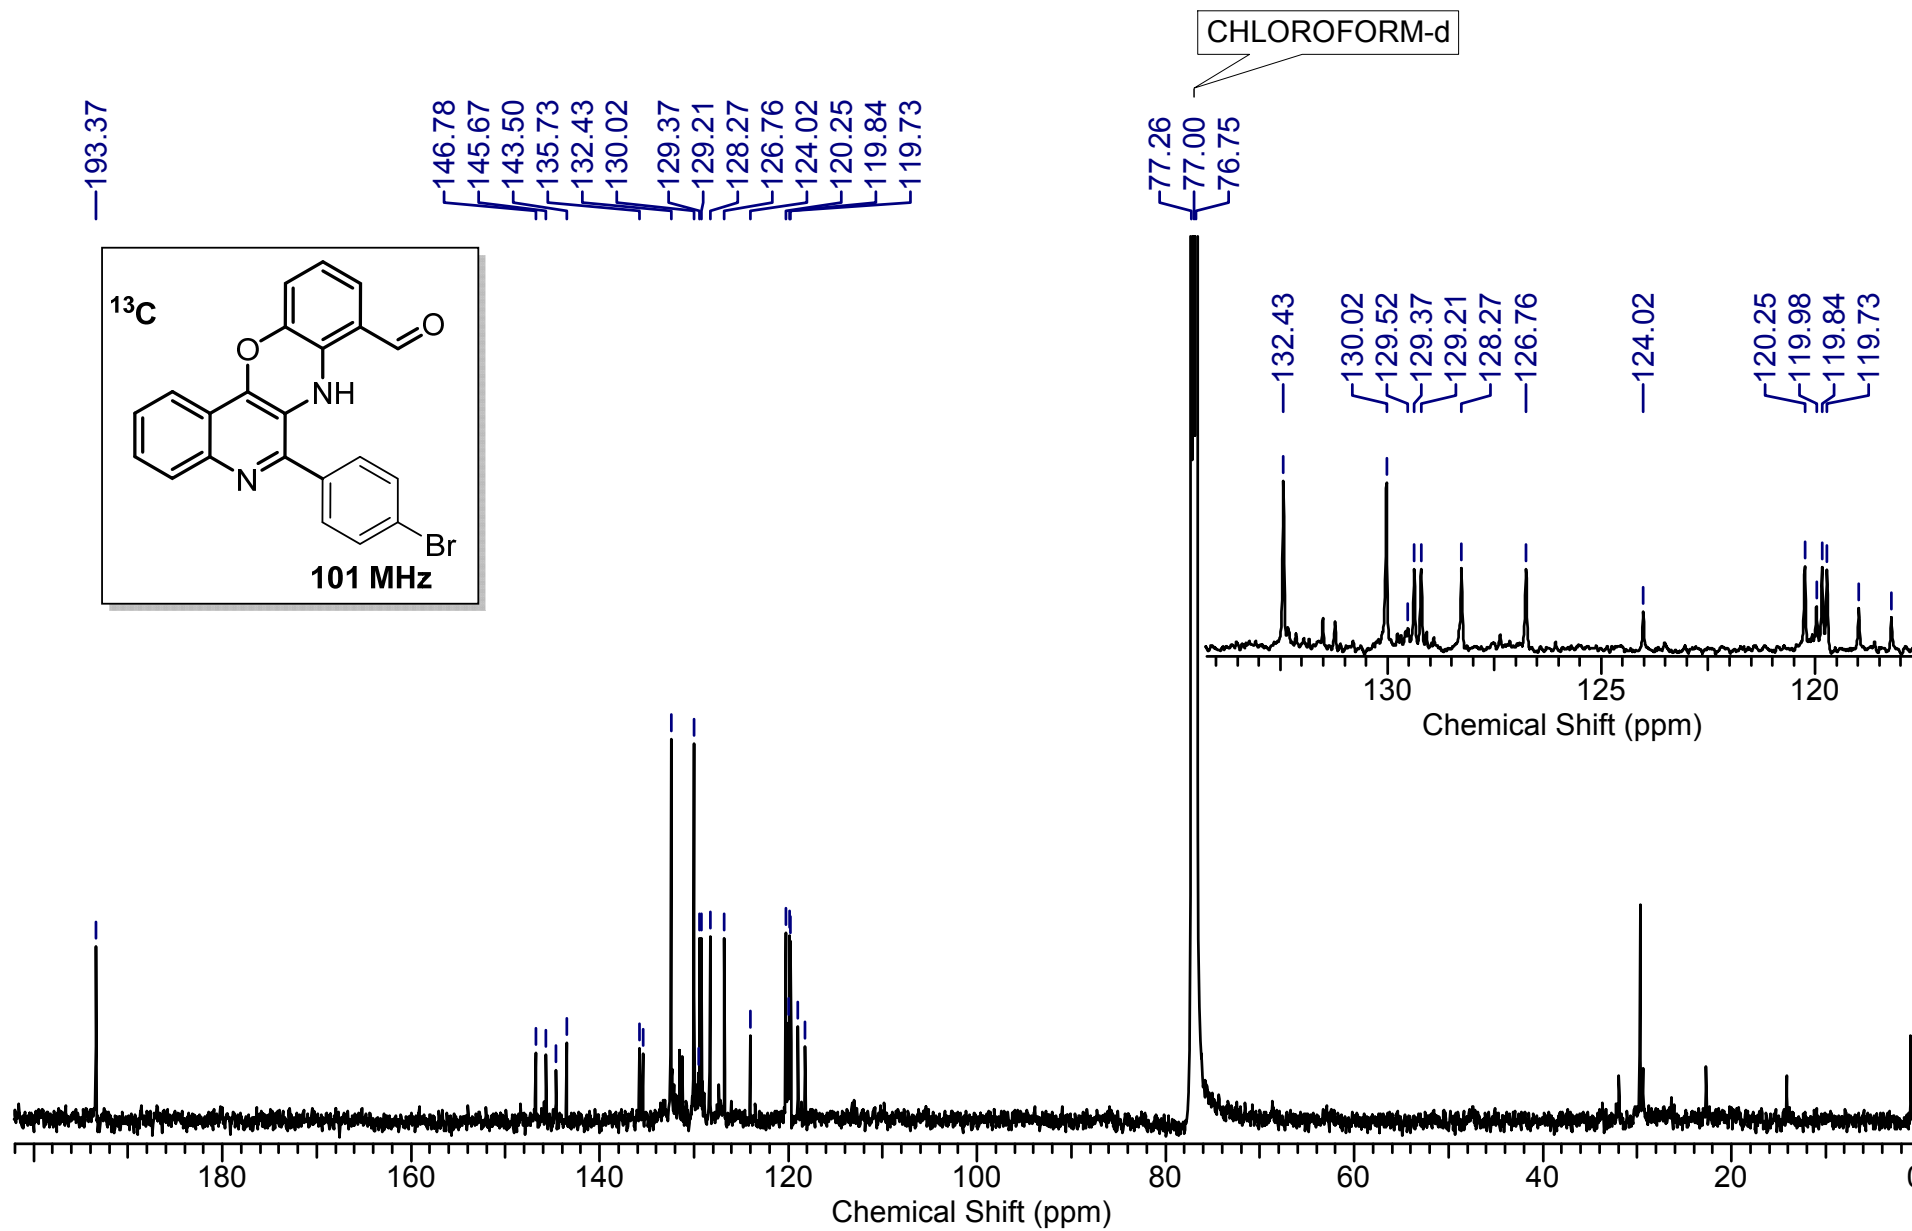

3ha

193.39

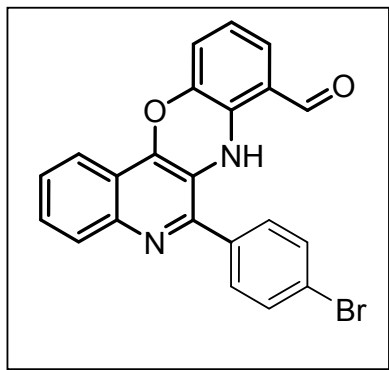

132.45  
130.04  
129.39  
129.23  
128.30  
126.78  
120.26  
119.86  
119.75

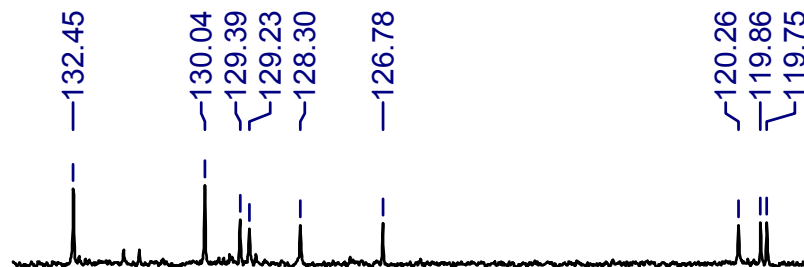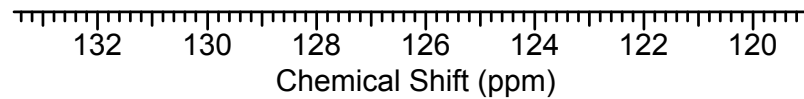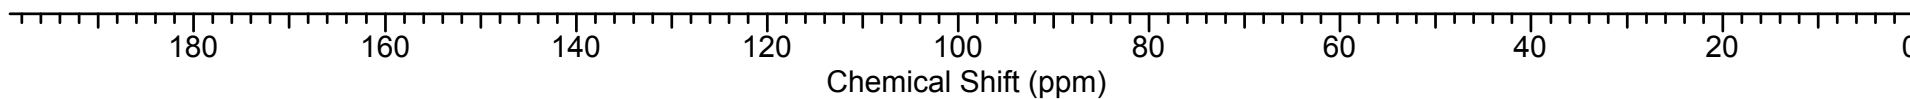

# 3ha

SH-653 #438 RT: 2.35 AV: 1 NL: 2.04E7  
T: FTMS + p ESI Full ms [100.0000-1500.0000]

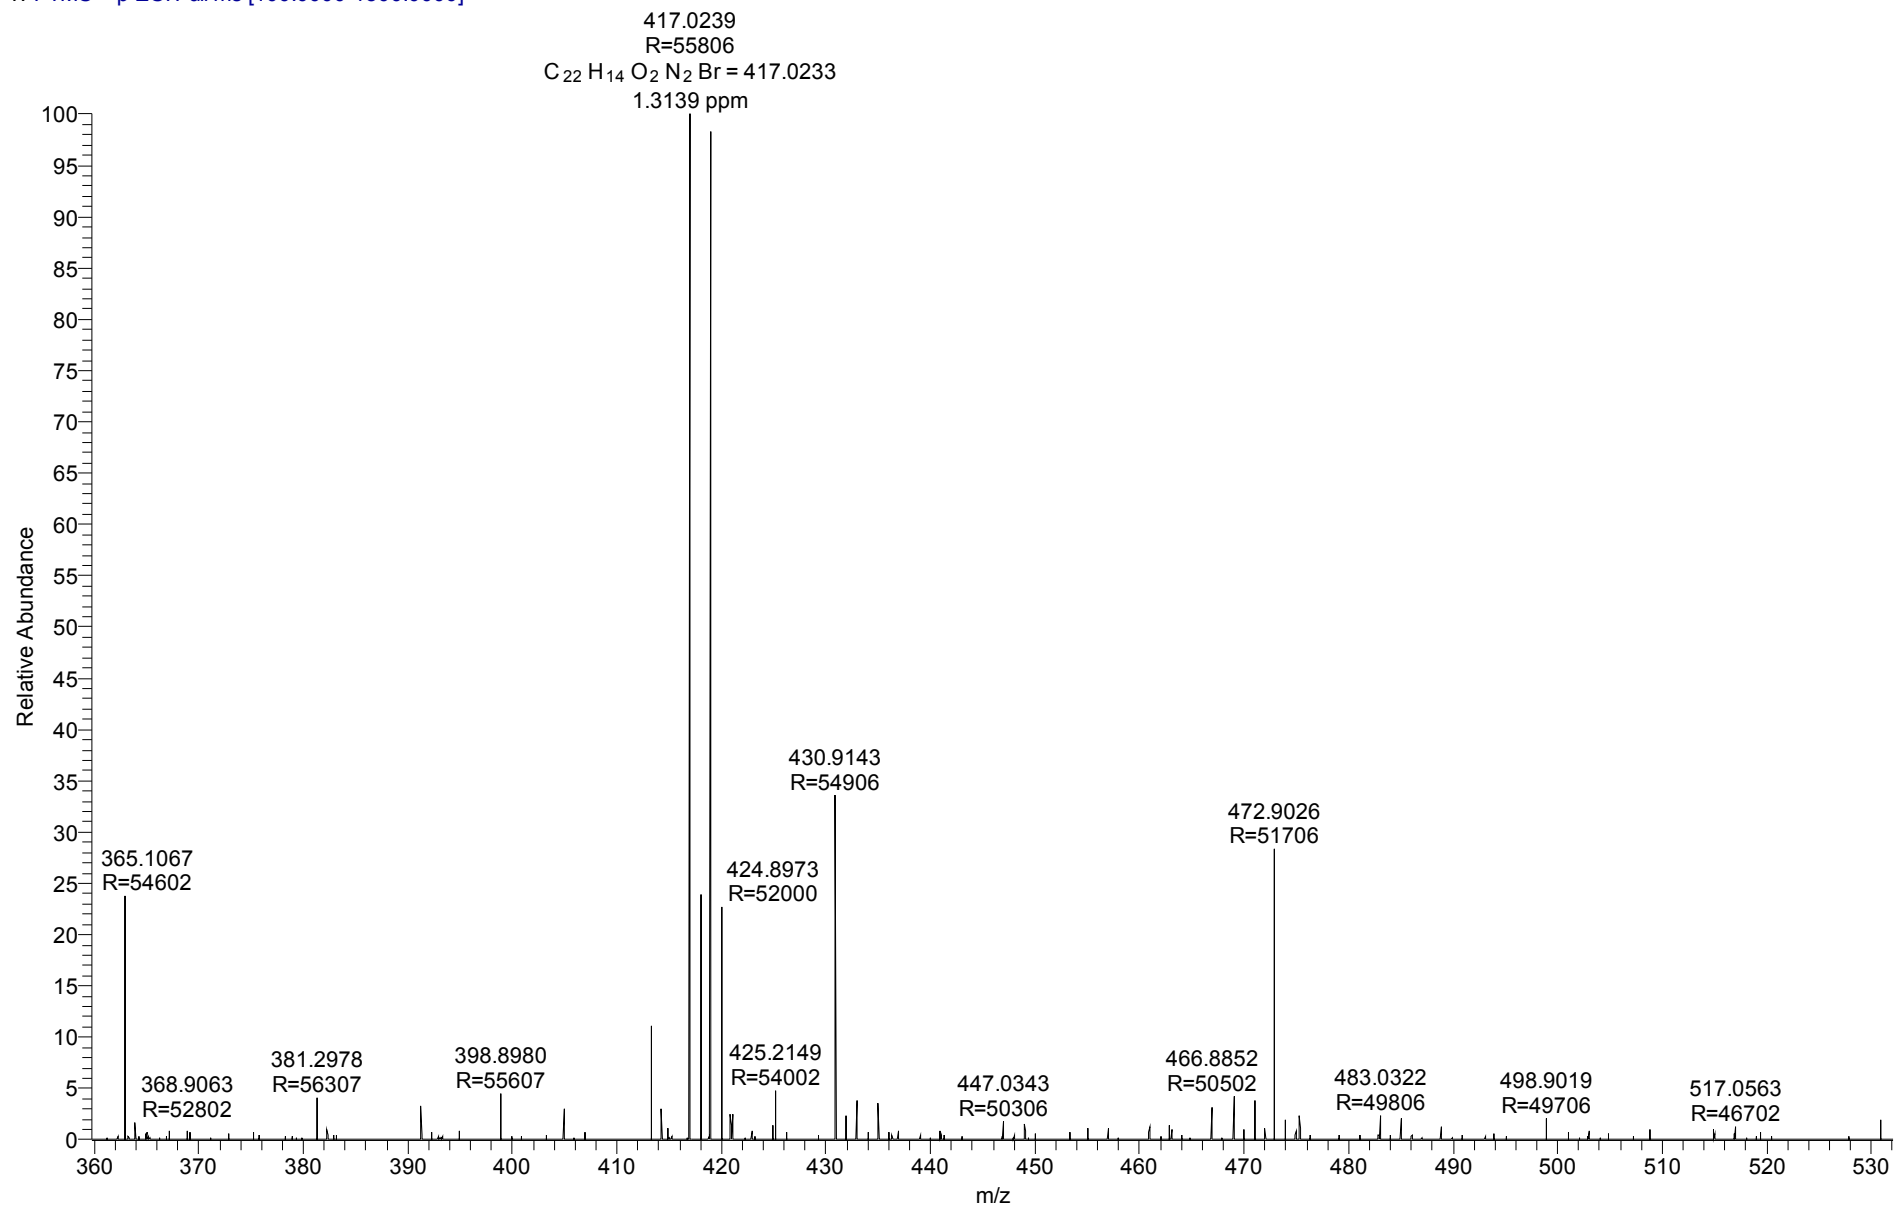

# 3fb

9.64  
9.57  
7.95  
7.93  
7.92  
7.90  
7.69  
7.67  
7.54  
7.46  
7.27  
7.13  
7.11  
6.88  
6.87

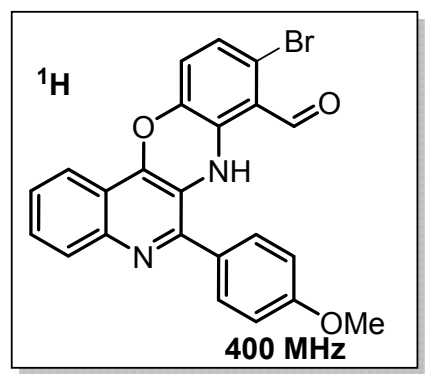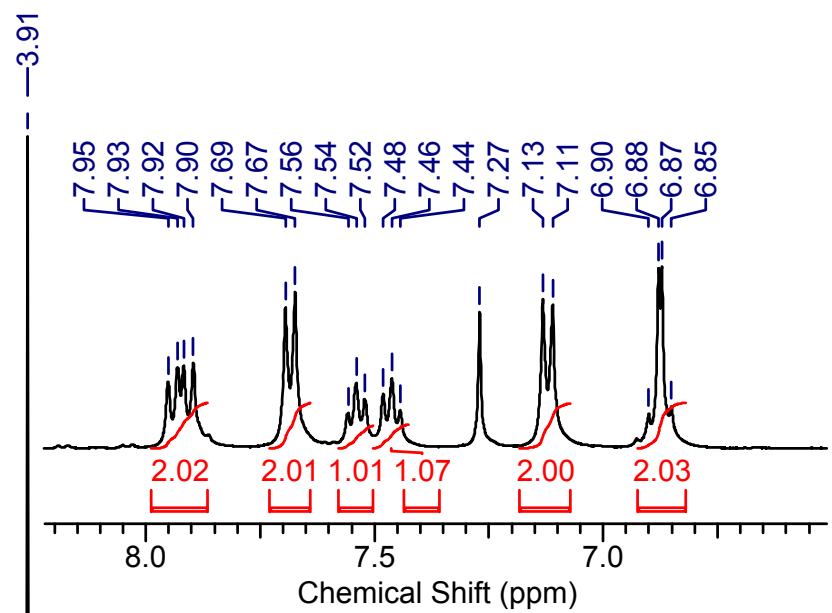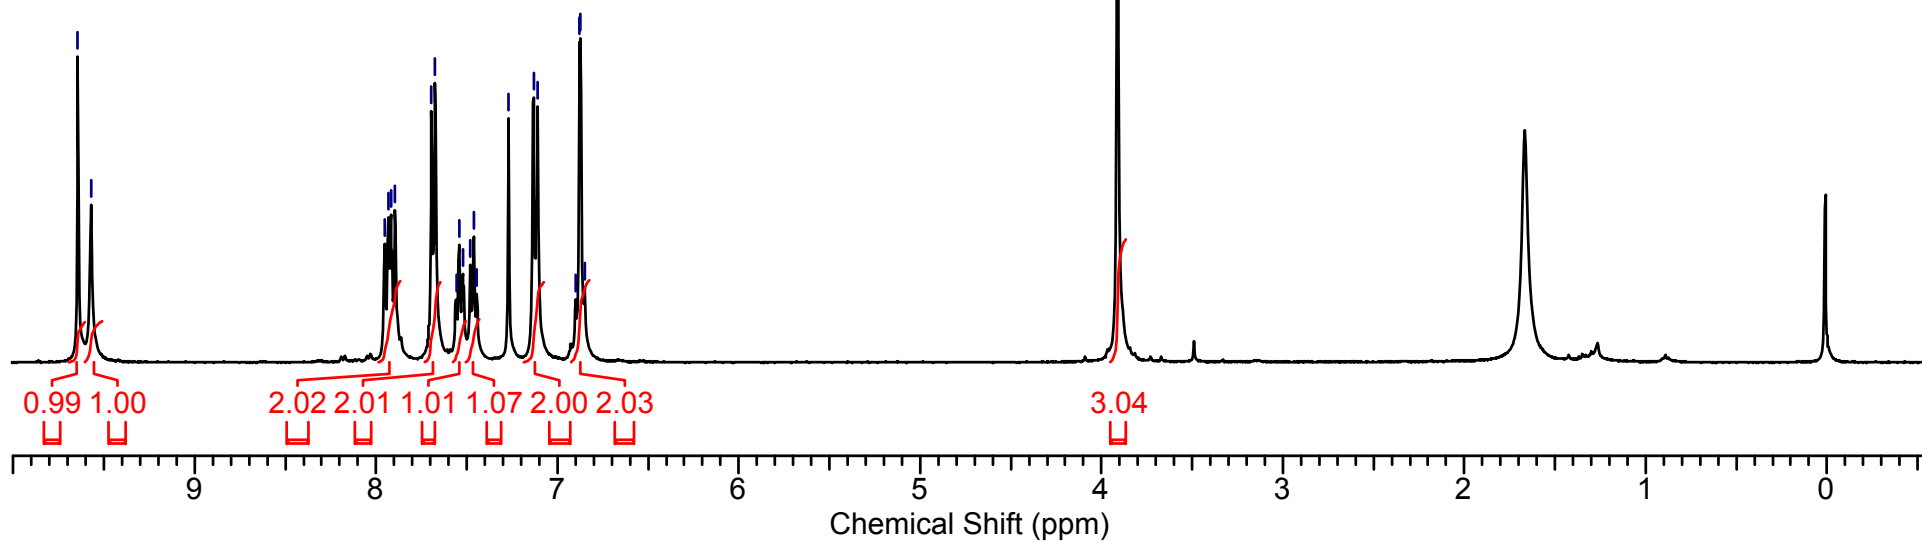

3fb

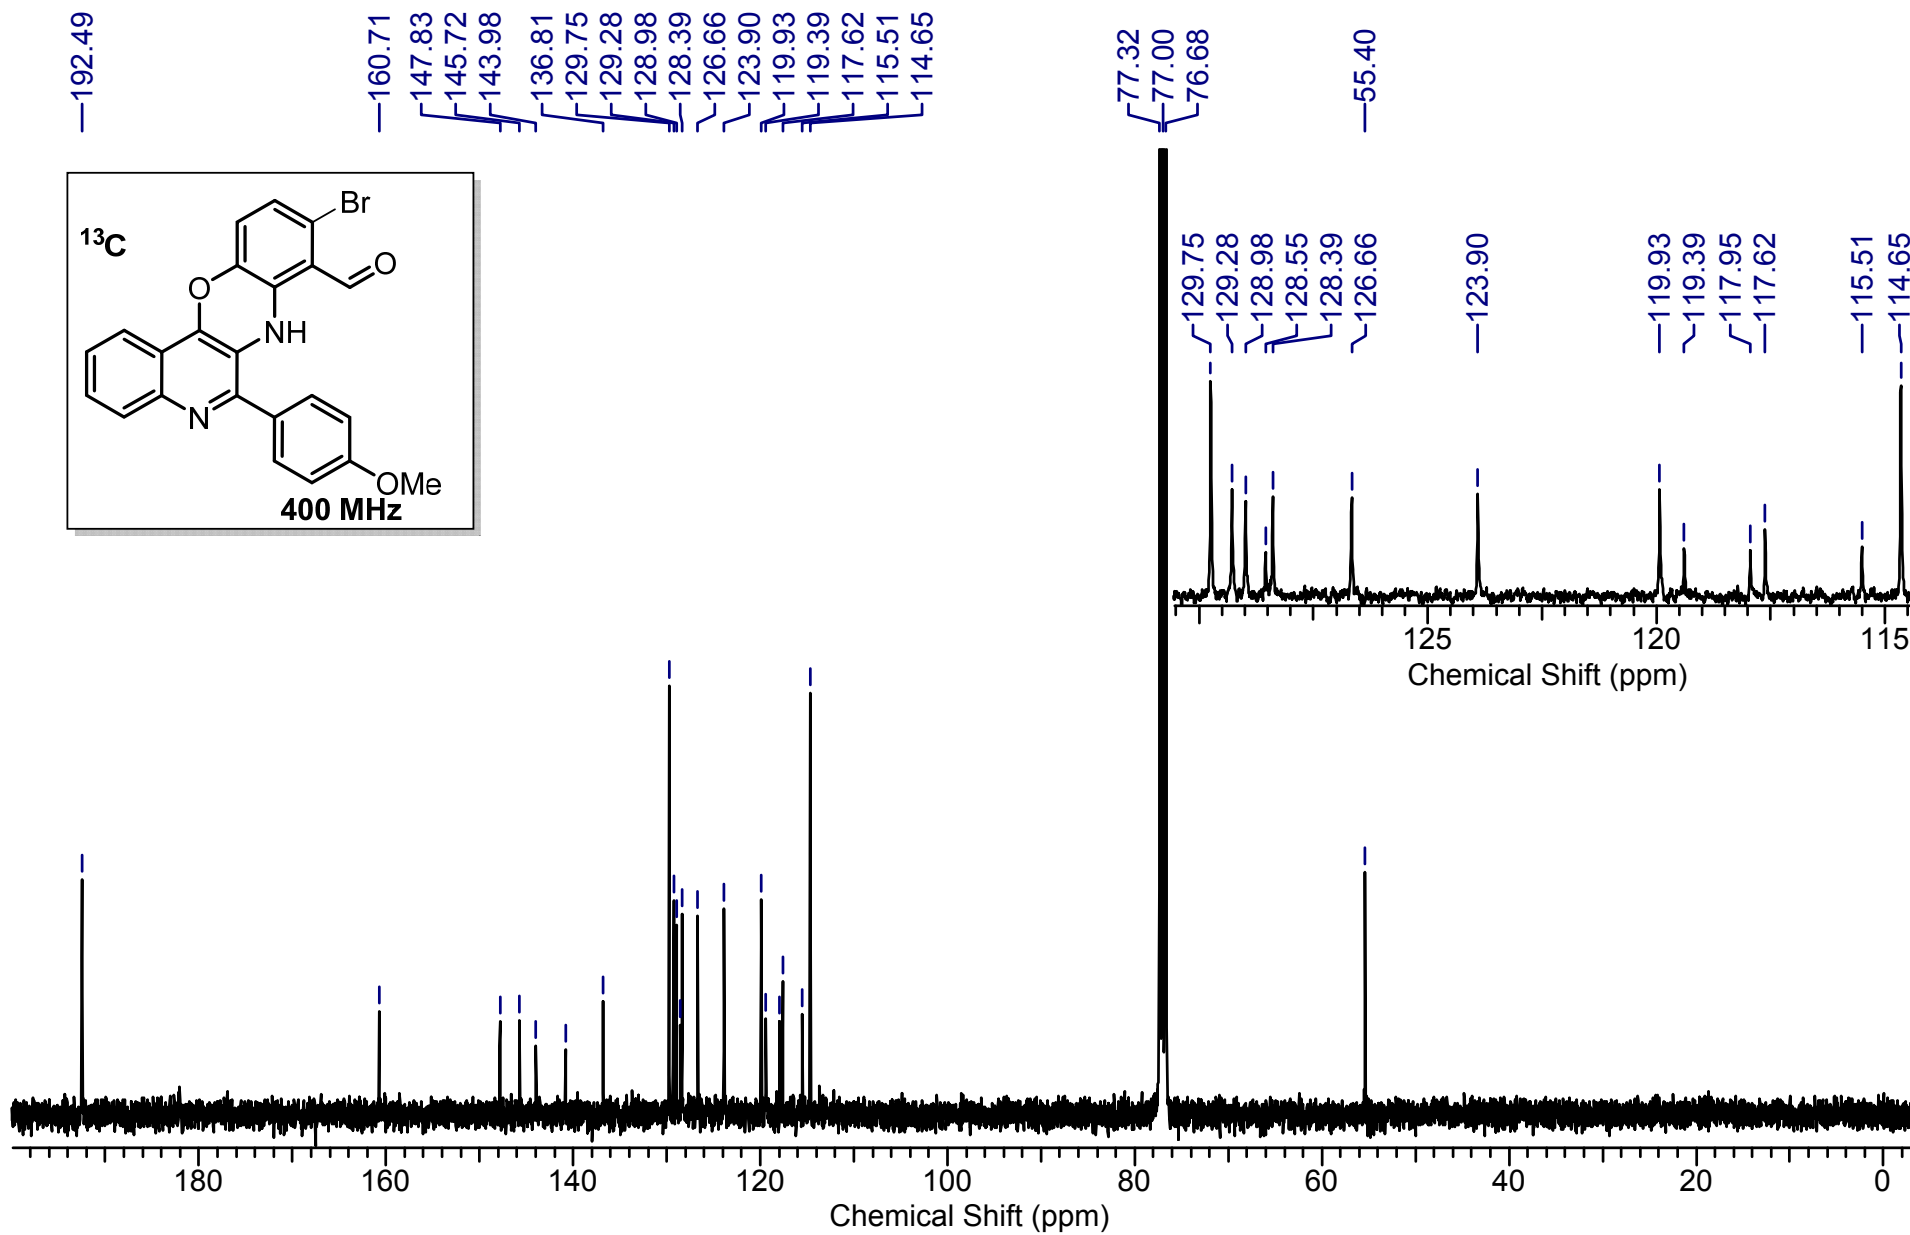

3fb

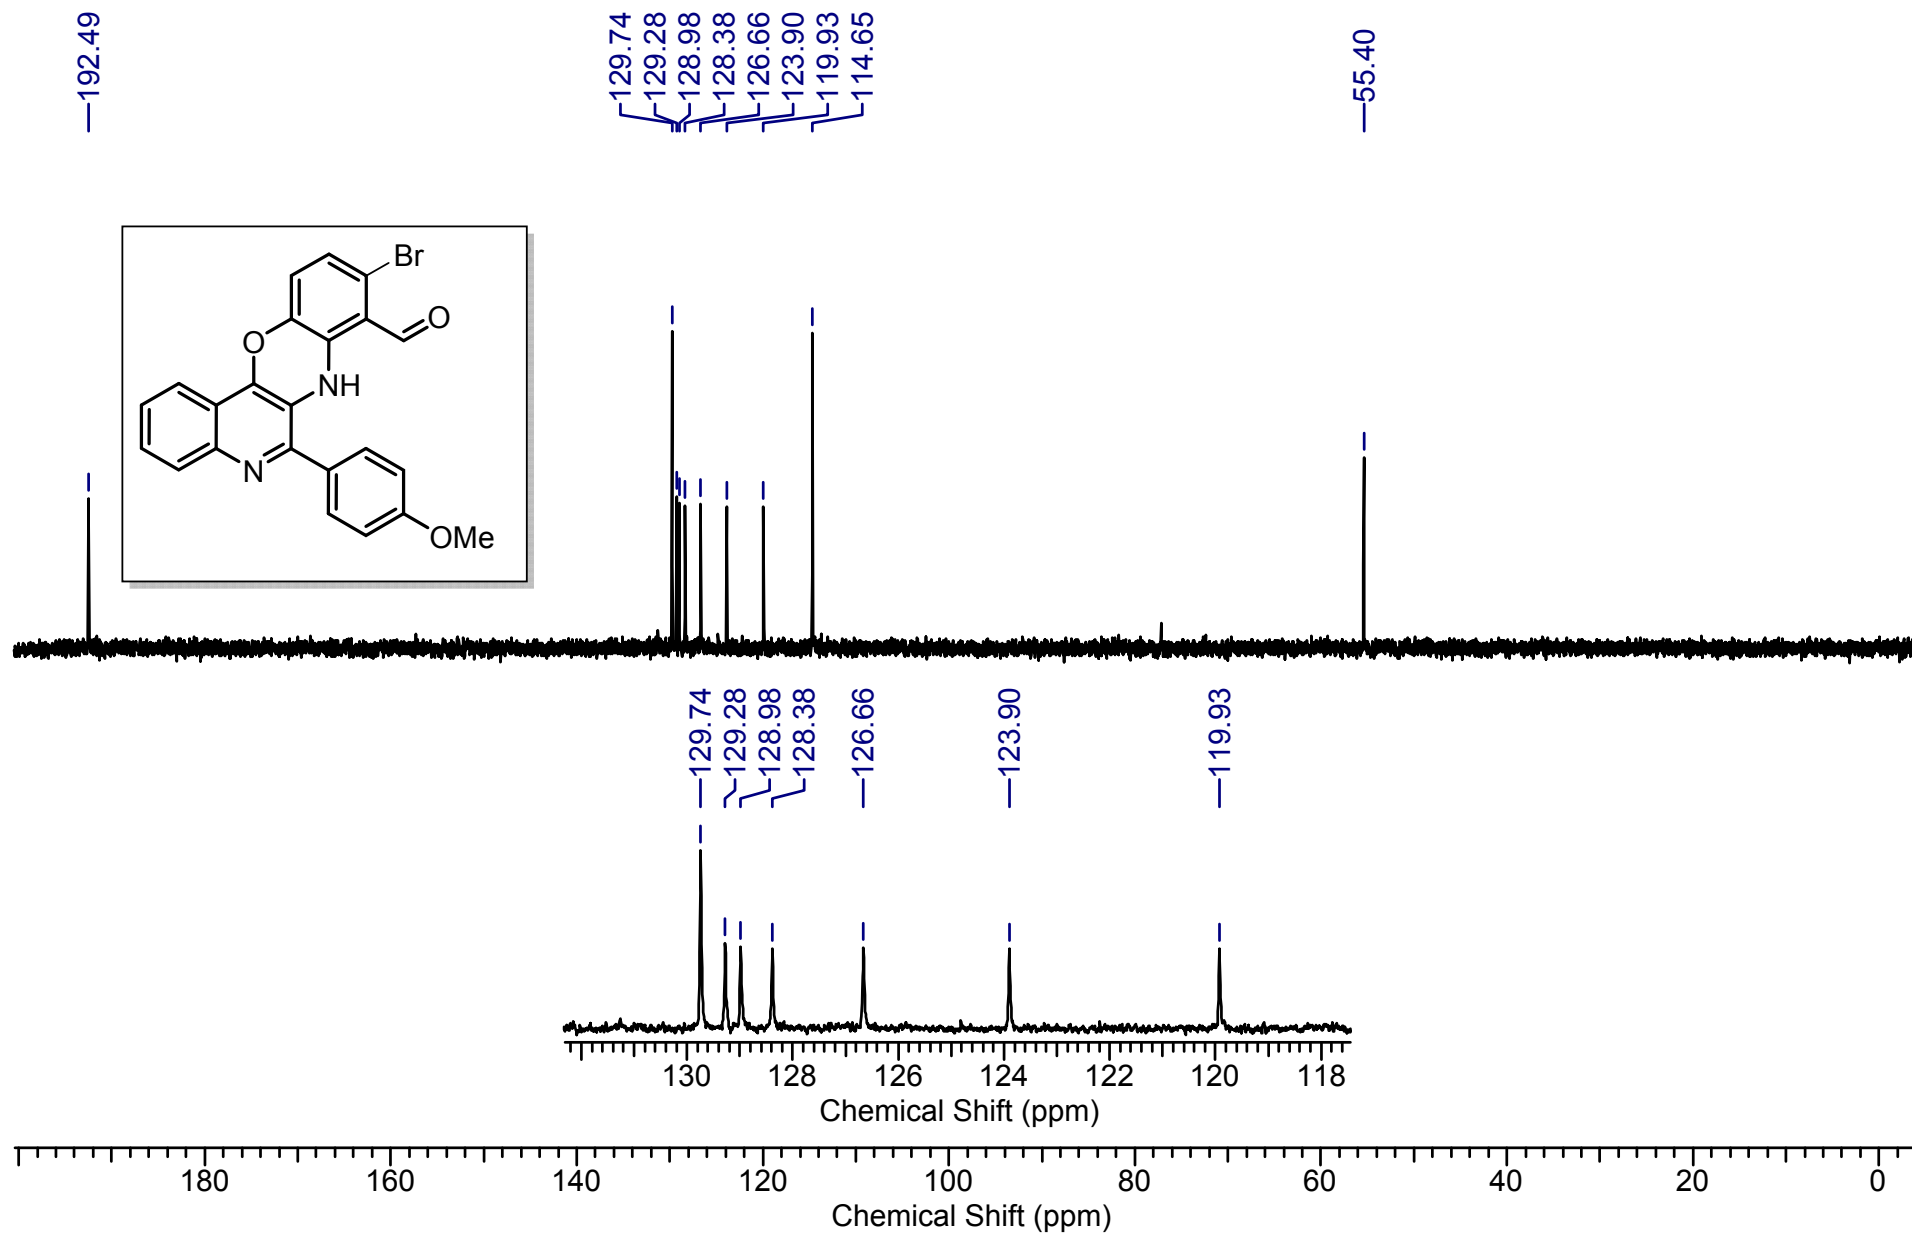



# 3fb

SH-614 #483 RT: 2.56 AV: 1 NL: 1.87E7  
T: FTMS + p ESI Full ms [100.0000-1500.0000]

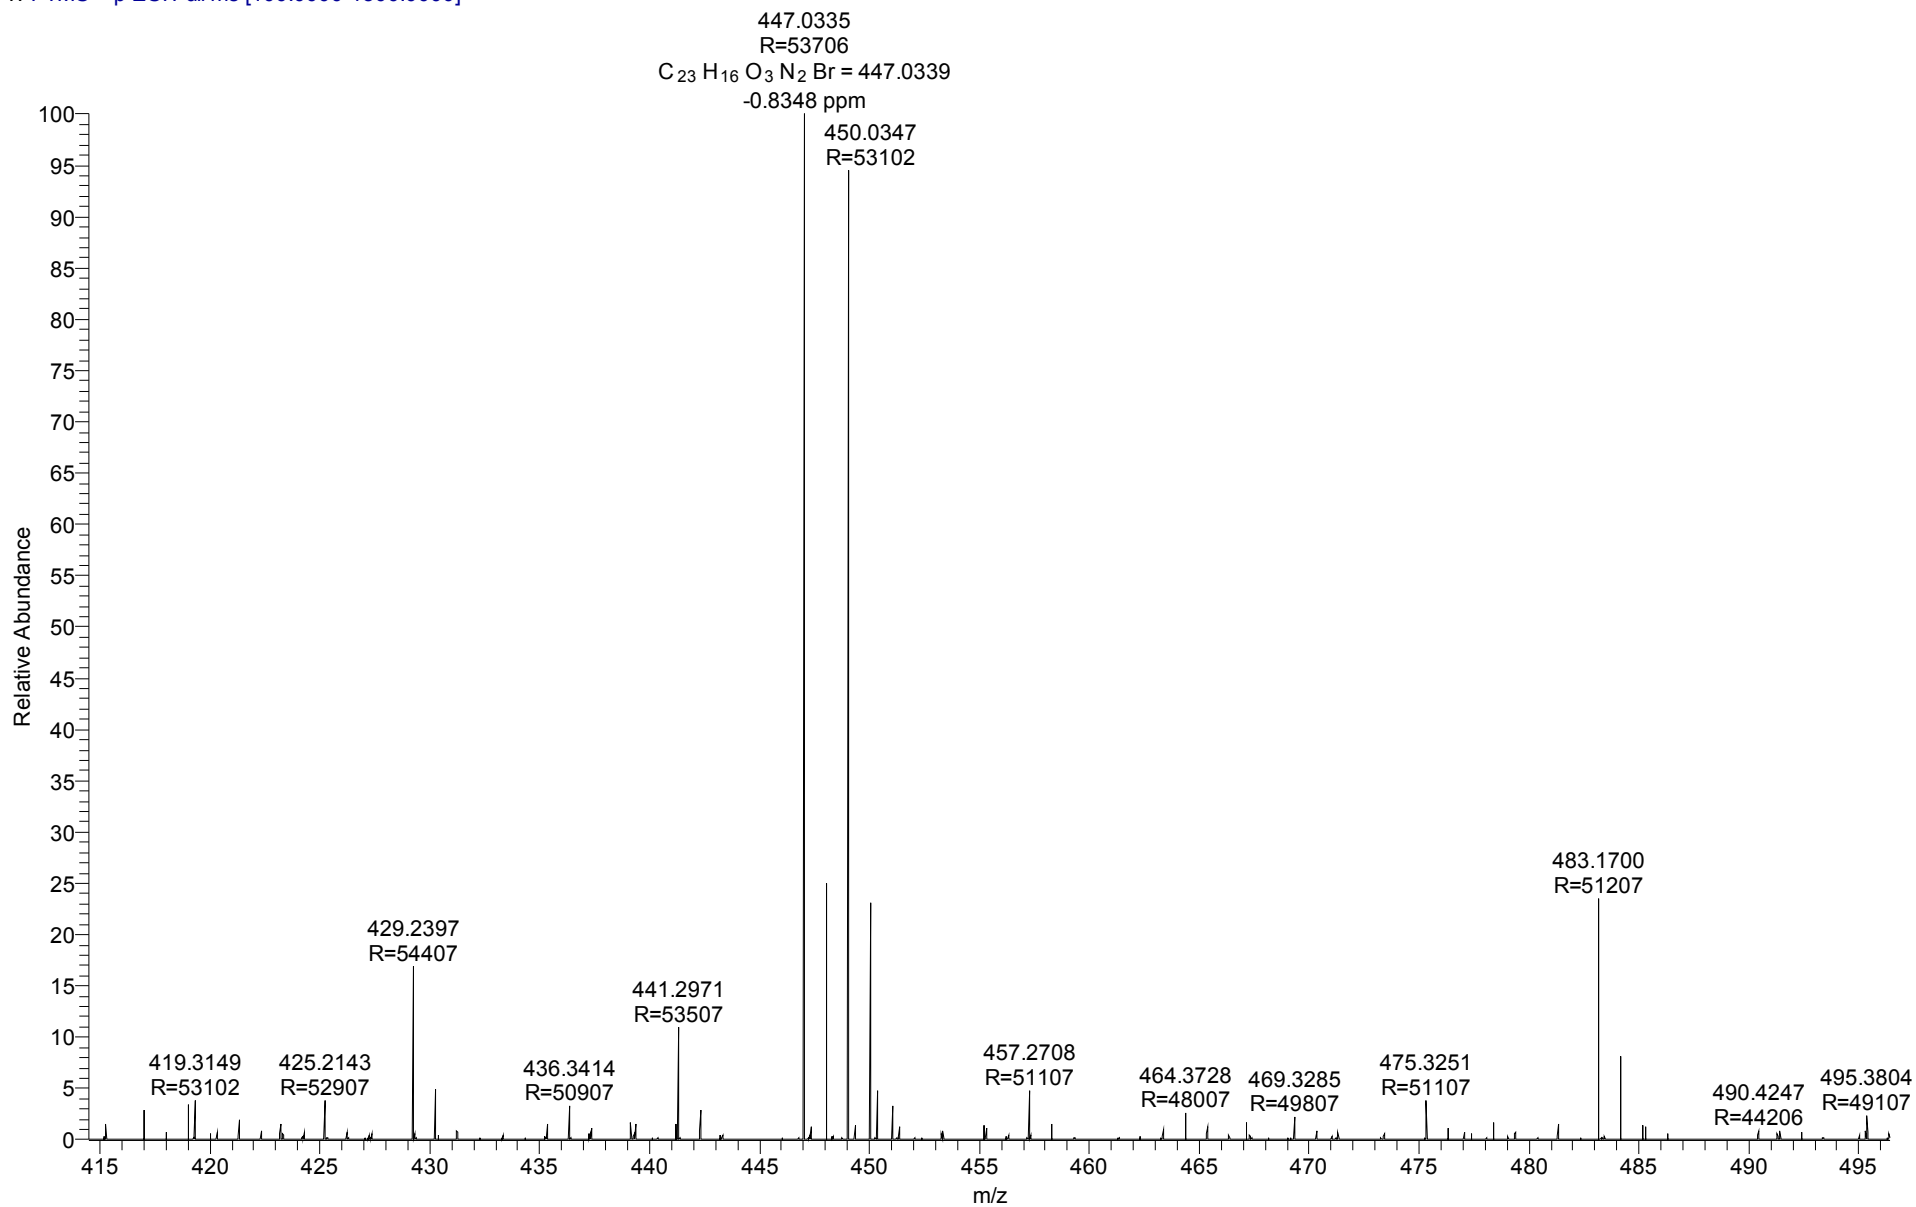

3fc

9.64  
9.57  
7.93  
7.91  
7.89  
7.69  
7.67  
7.54  
7.46  
7.27  
7.13  
7.11  
6.96  
6.94  
6.71  
6.69

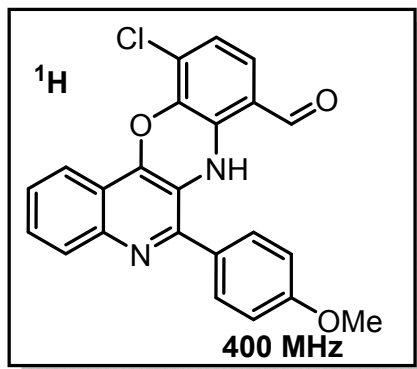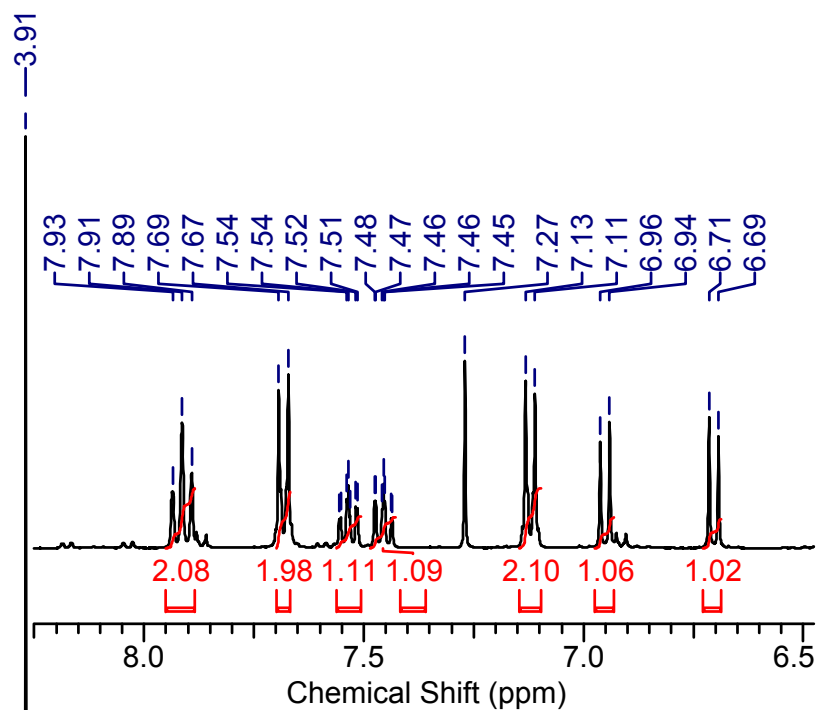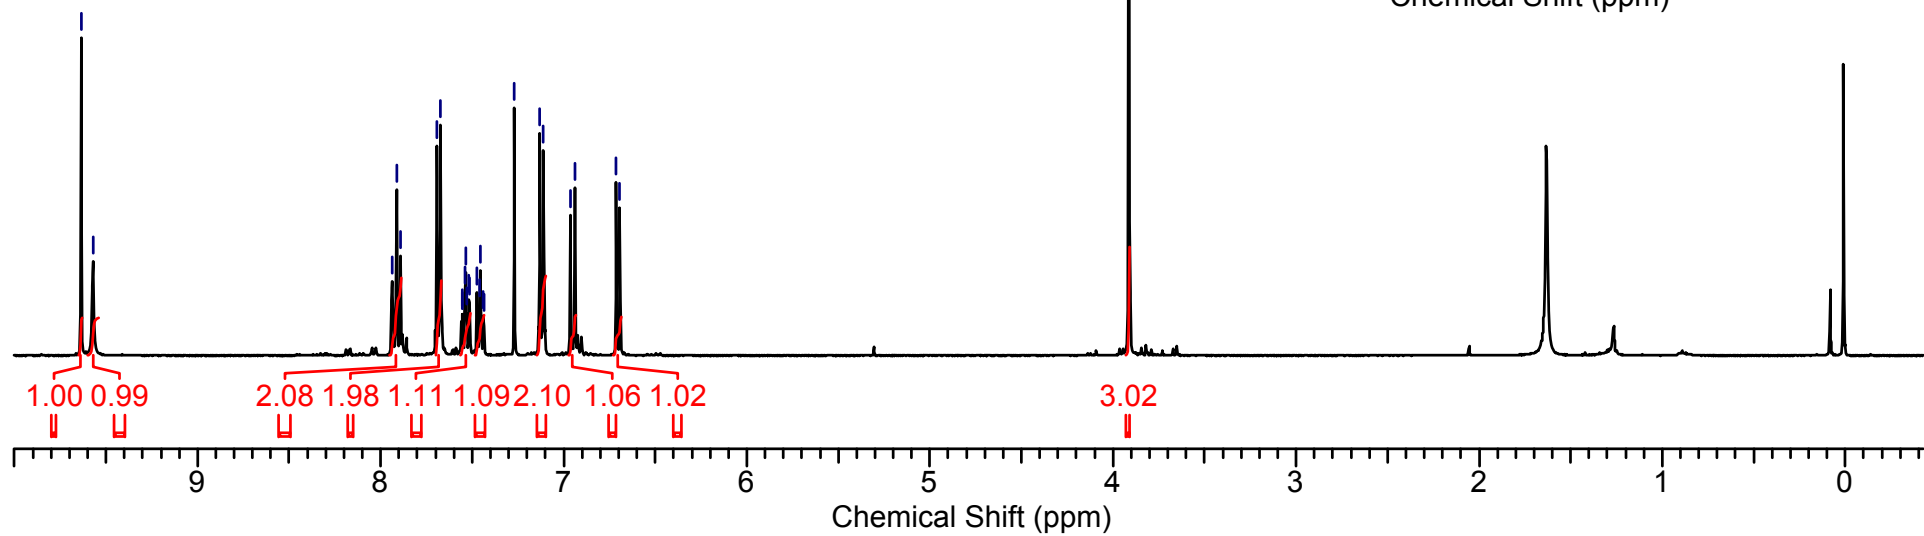

3fc

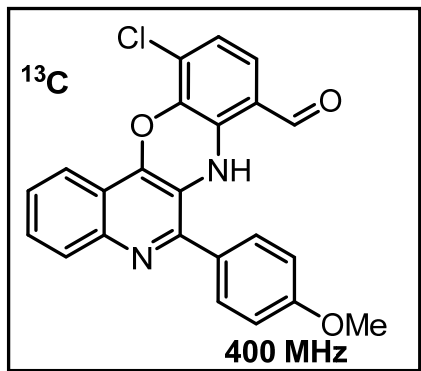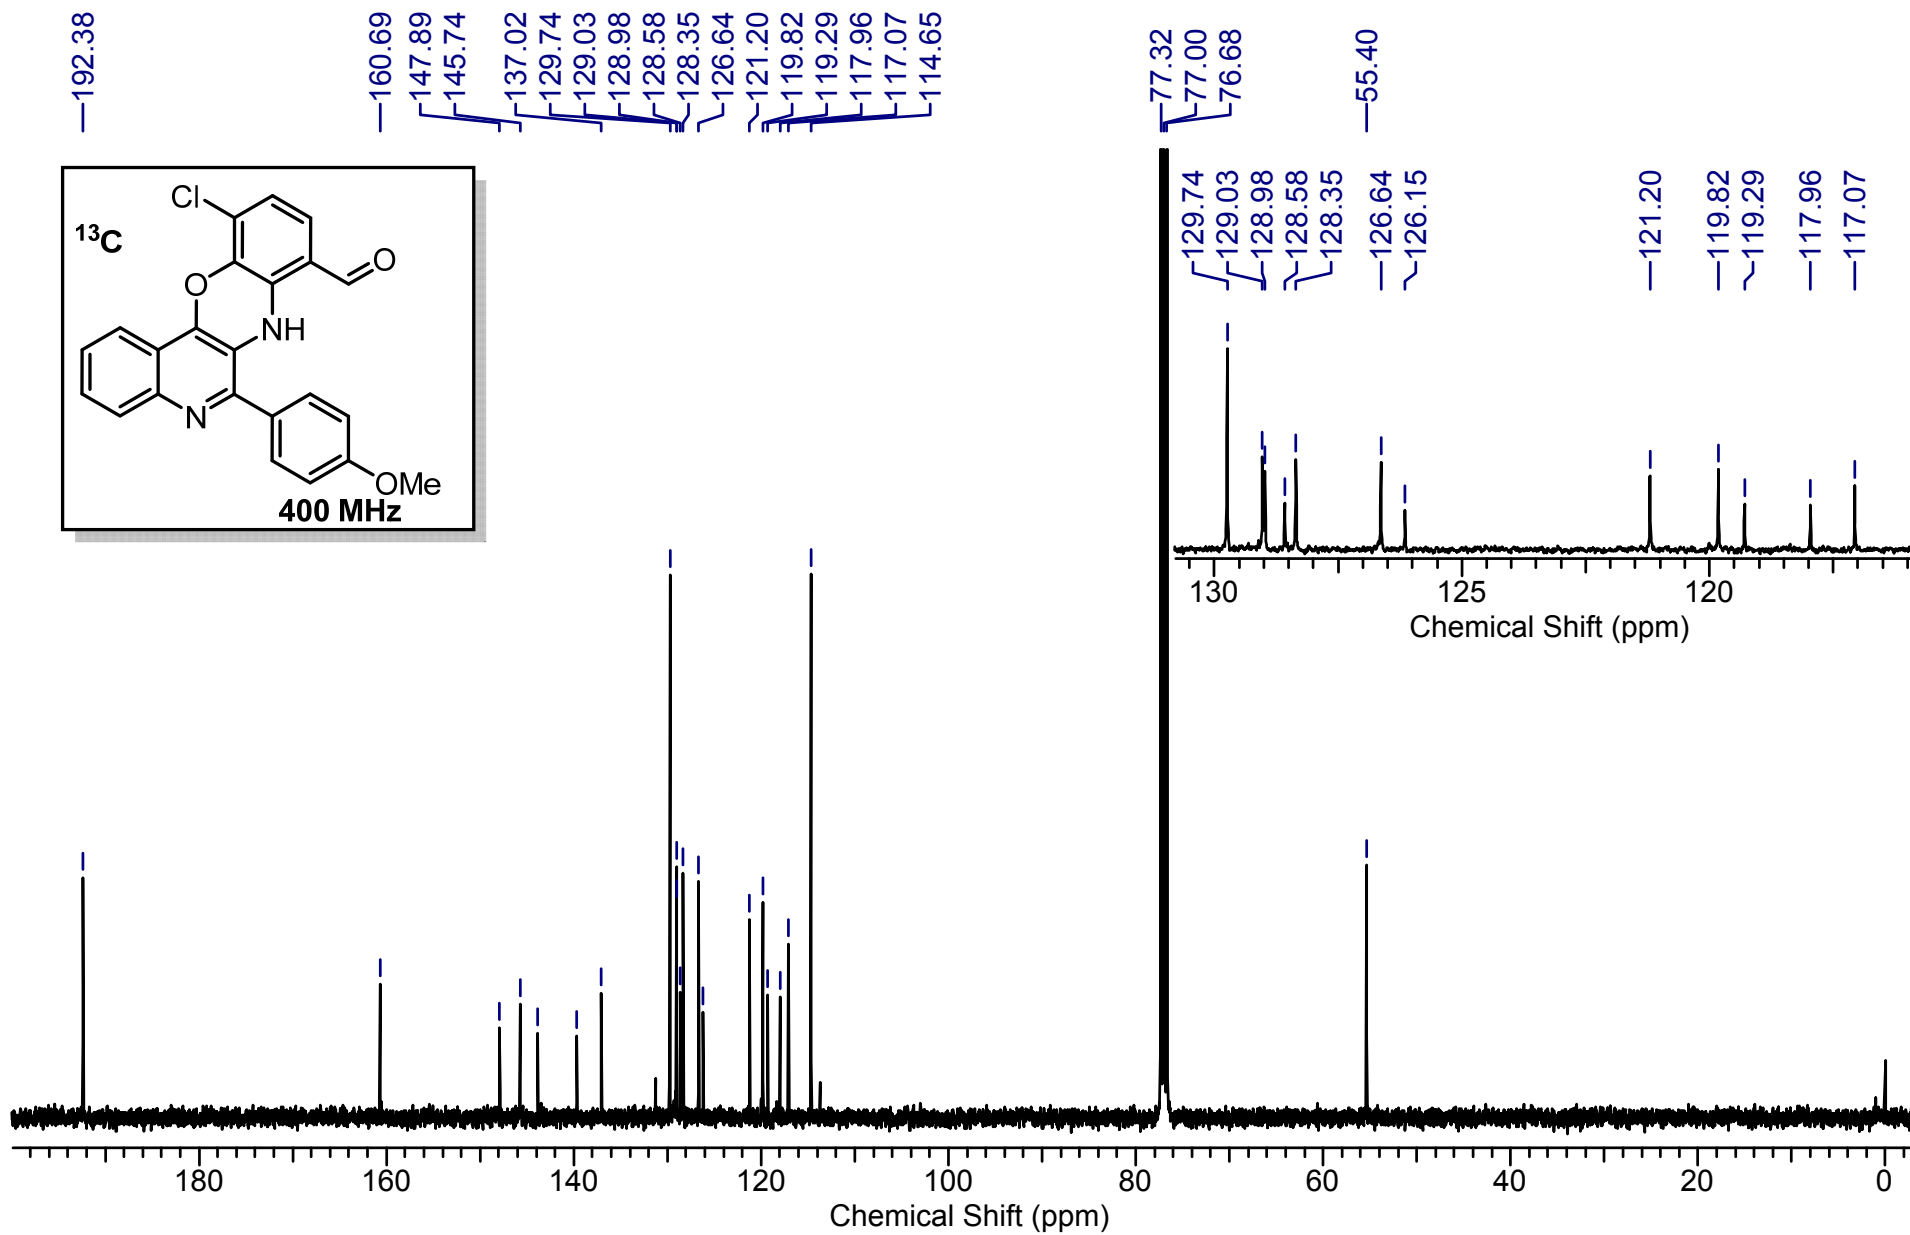

3fc

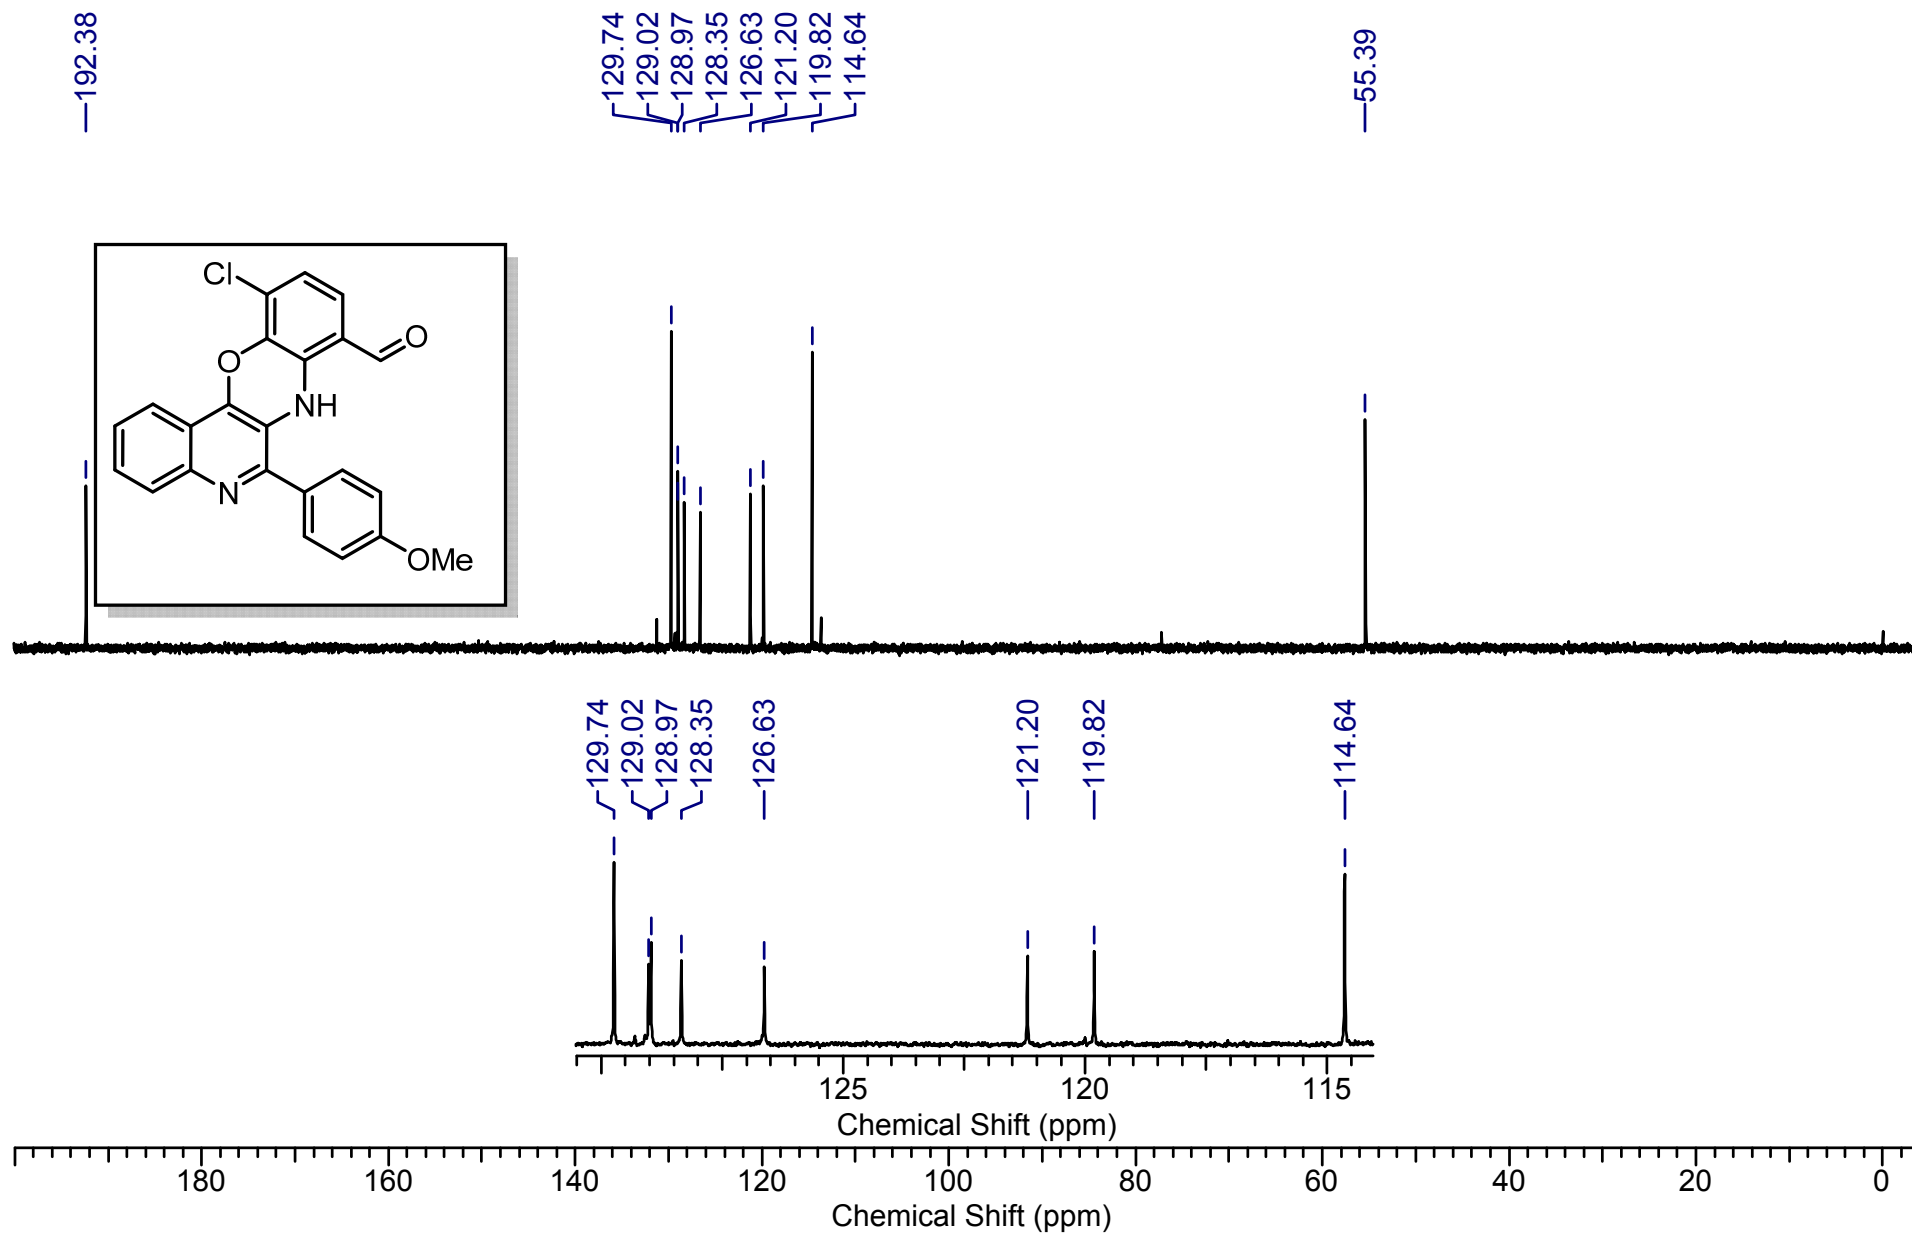

# 3fc

SH-613 #477 RT: 2.53 AV: 1 NL: 2.51E7  
T: FTMS + p ESI Full ms [100.0000-1500.0000]

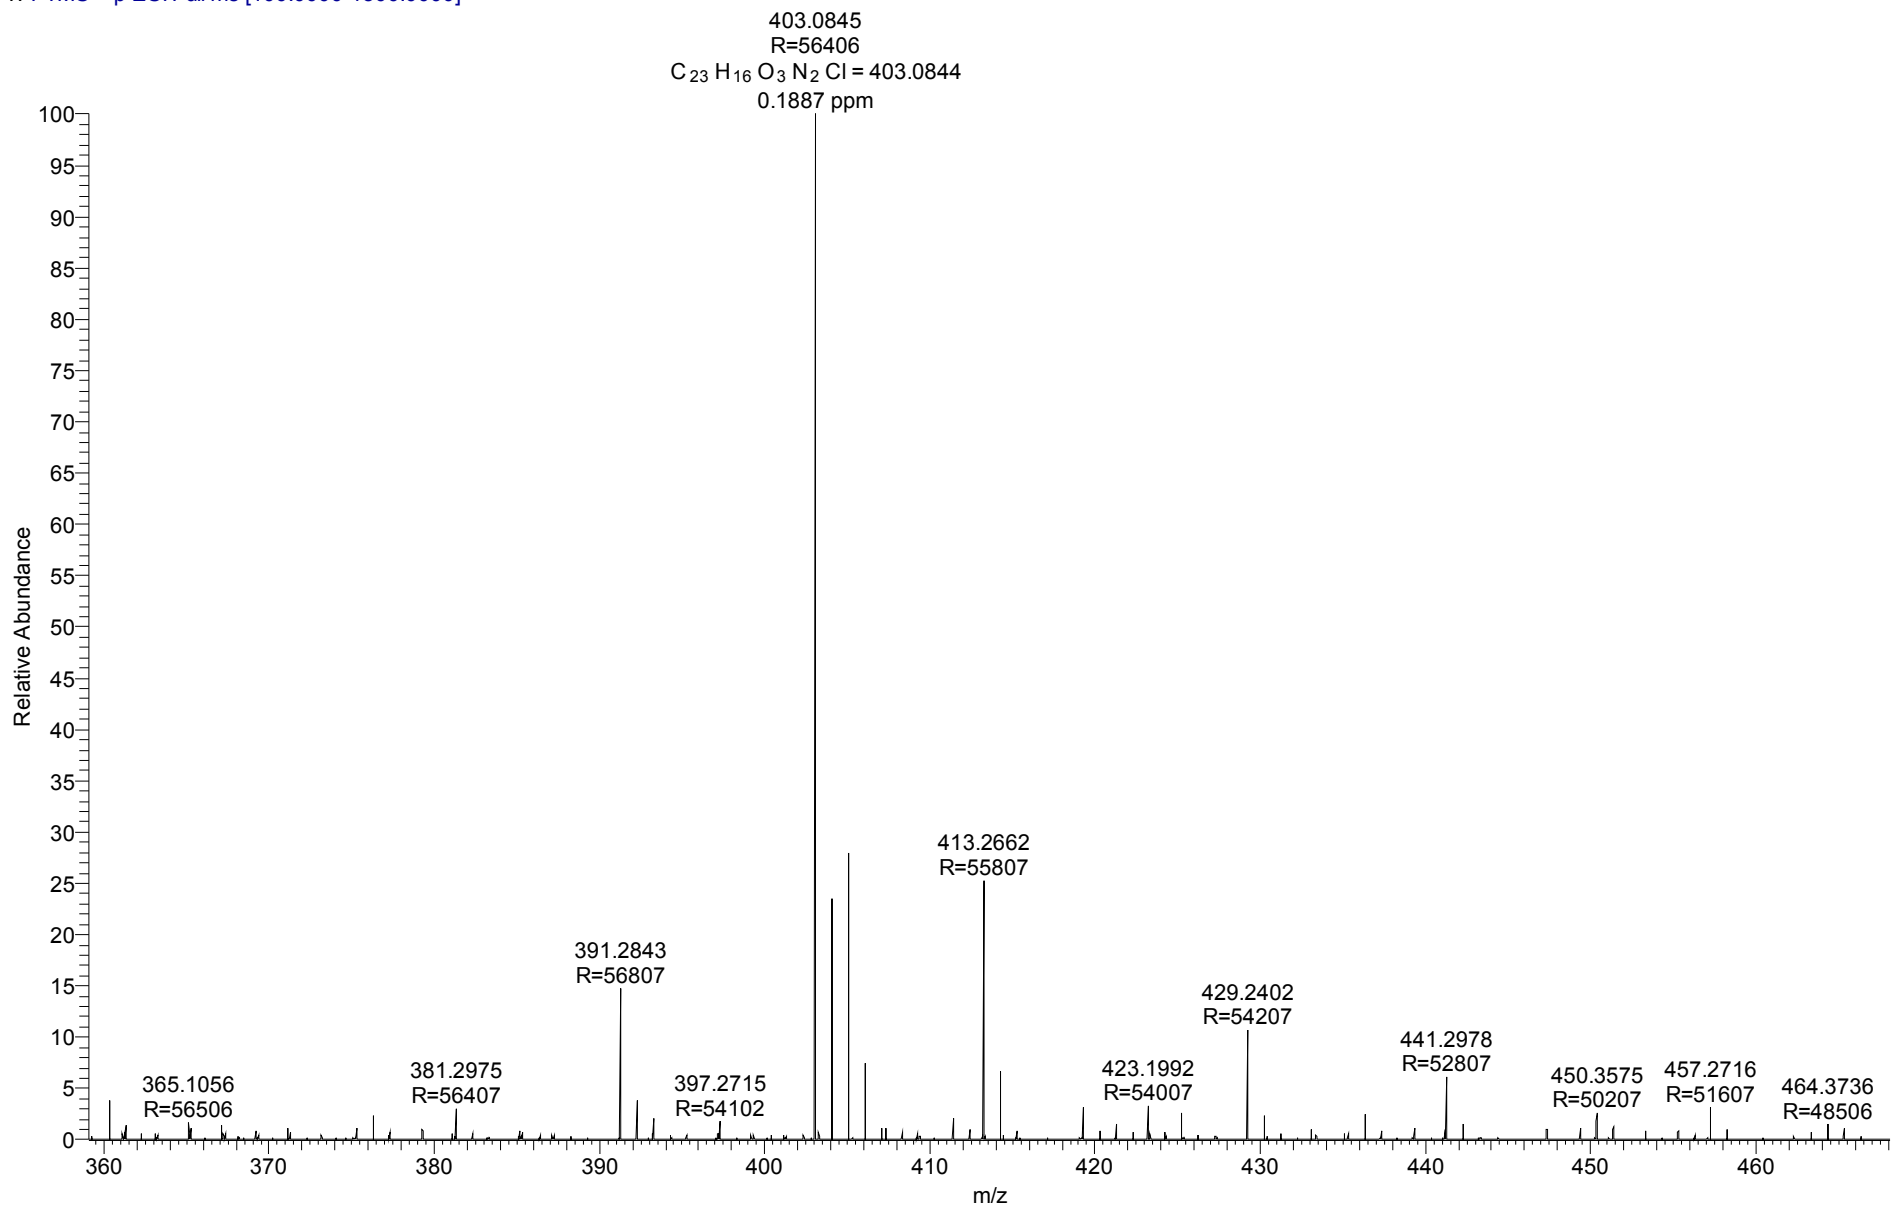

3fd

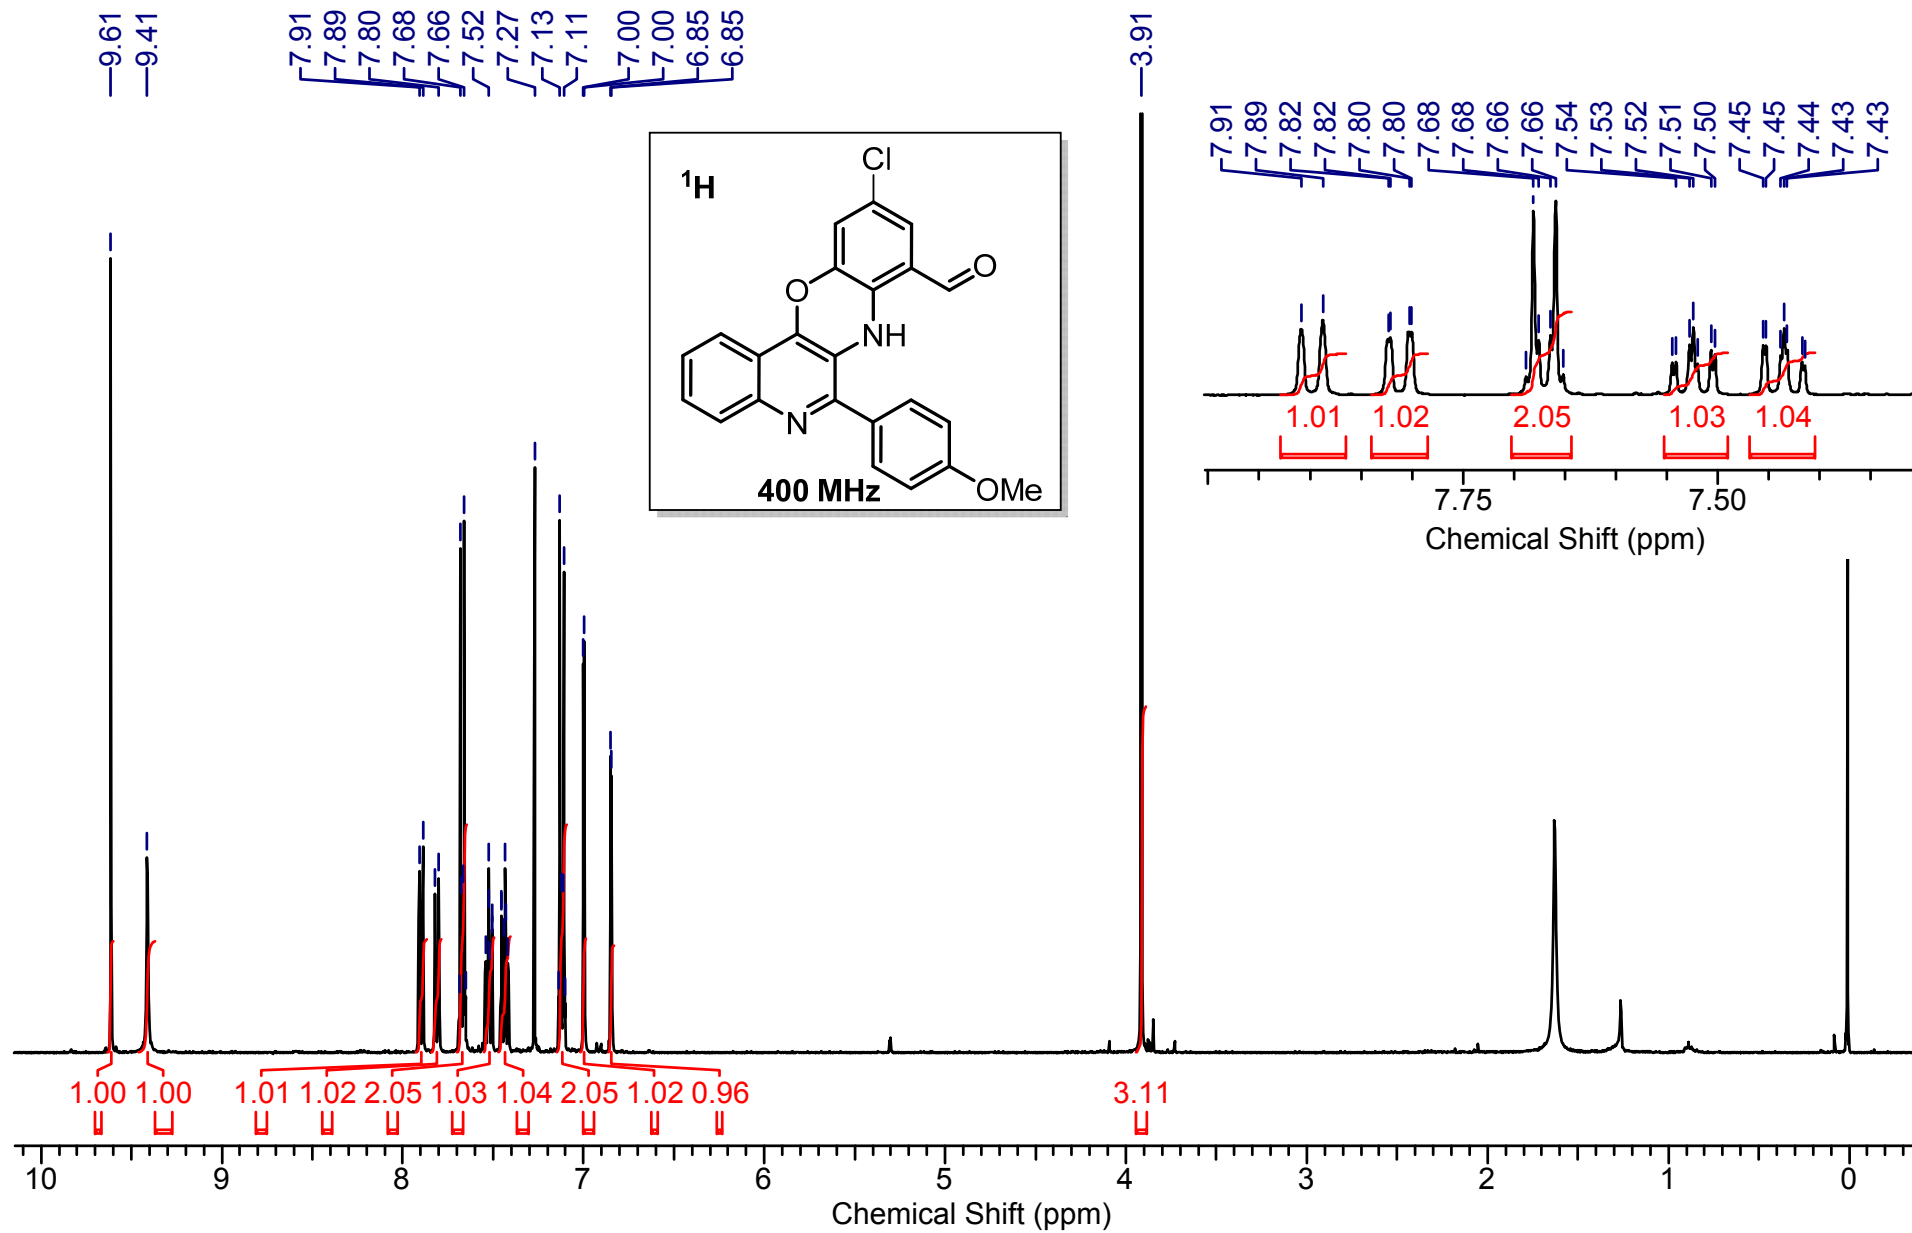

# 3fd

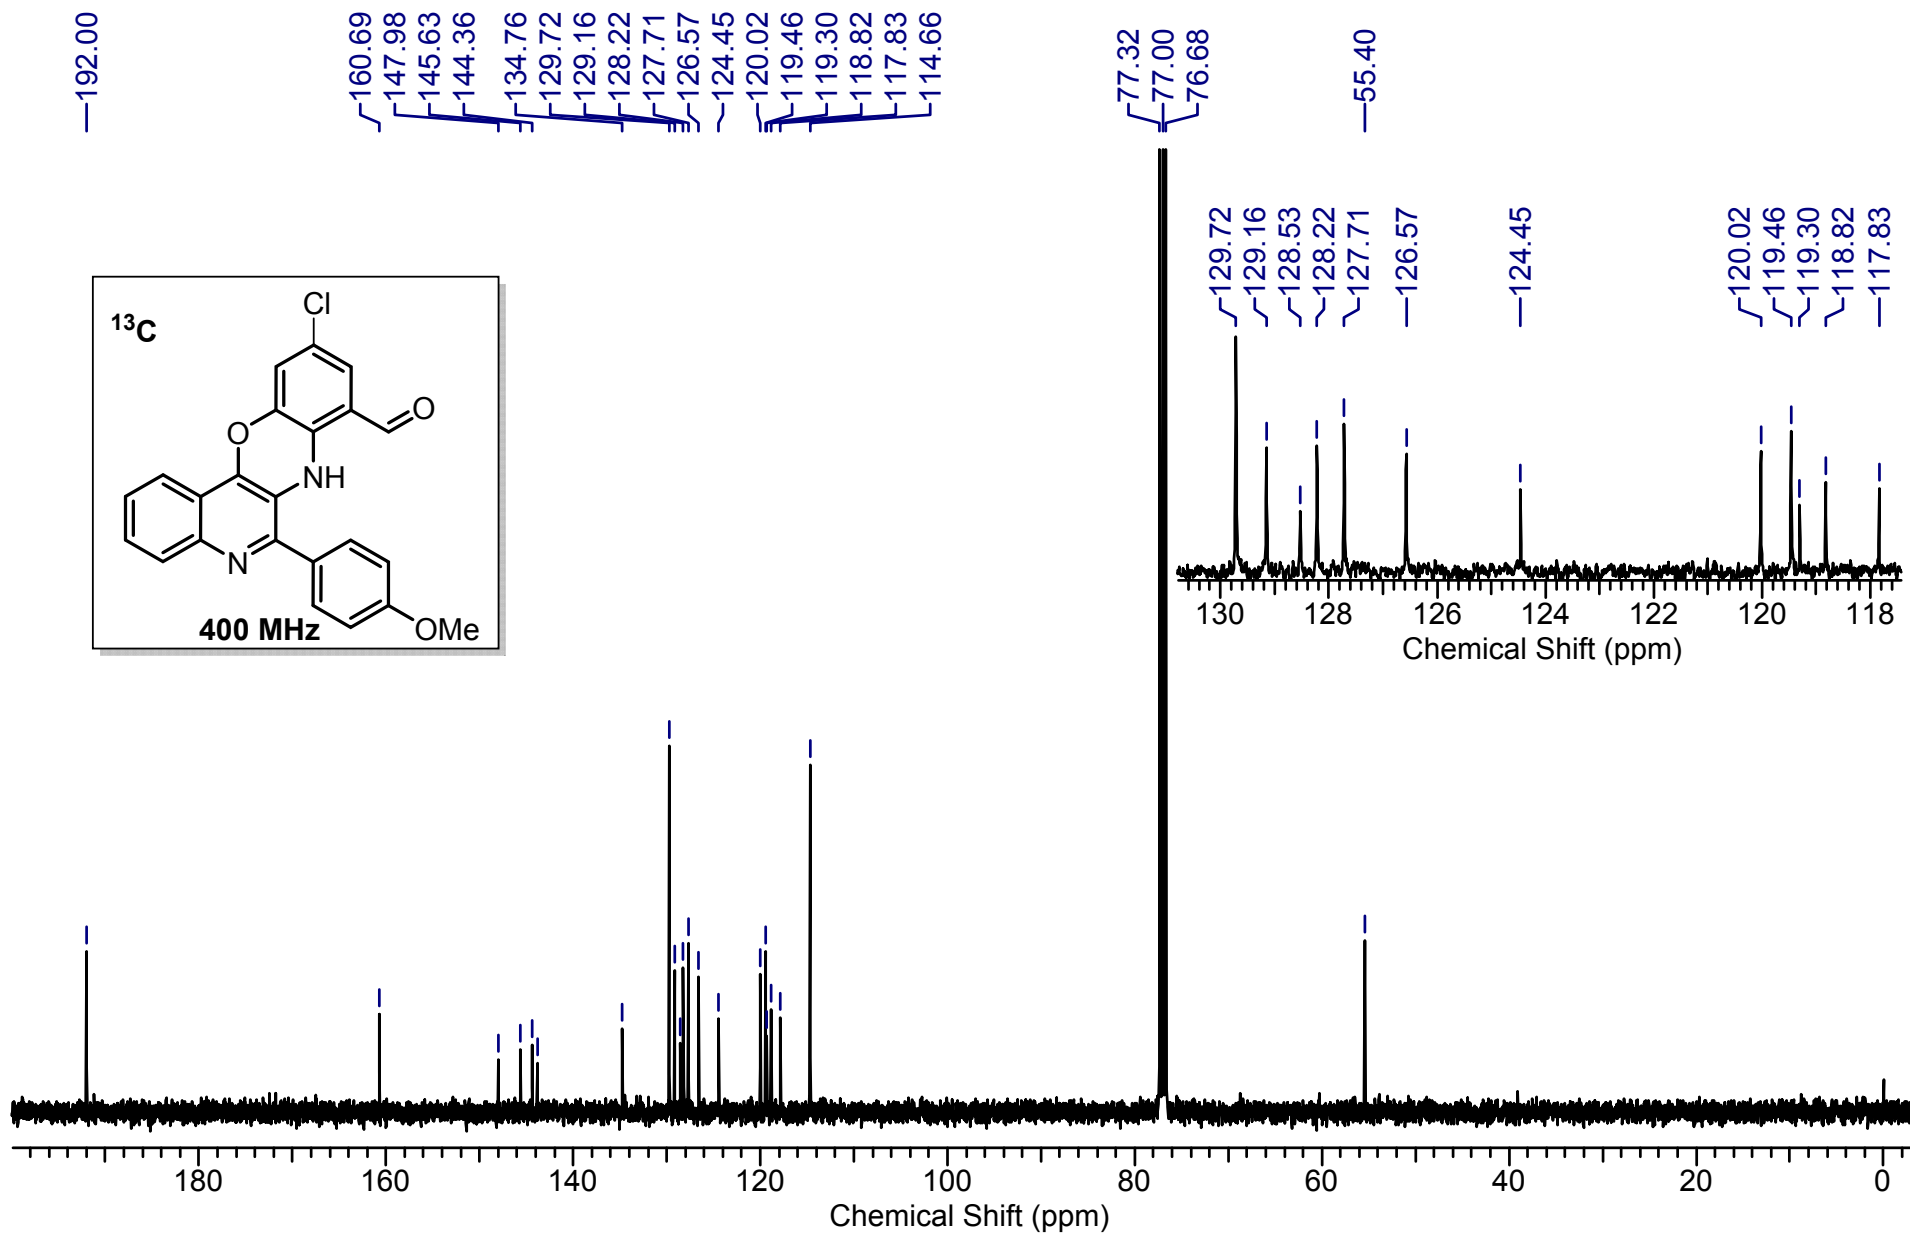

3fd

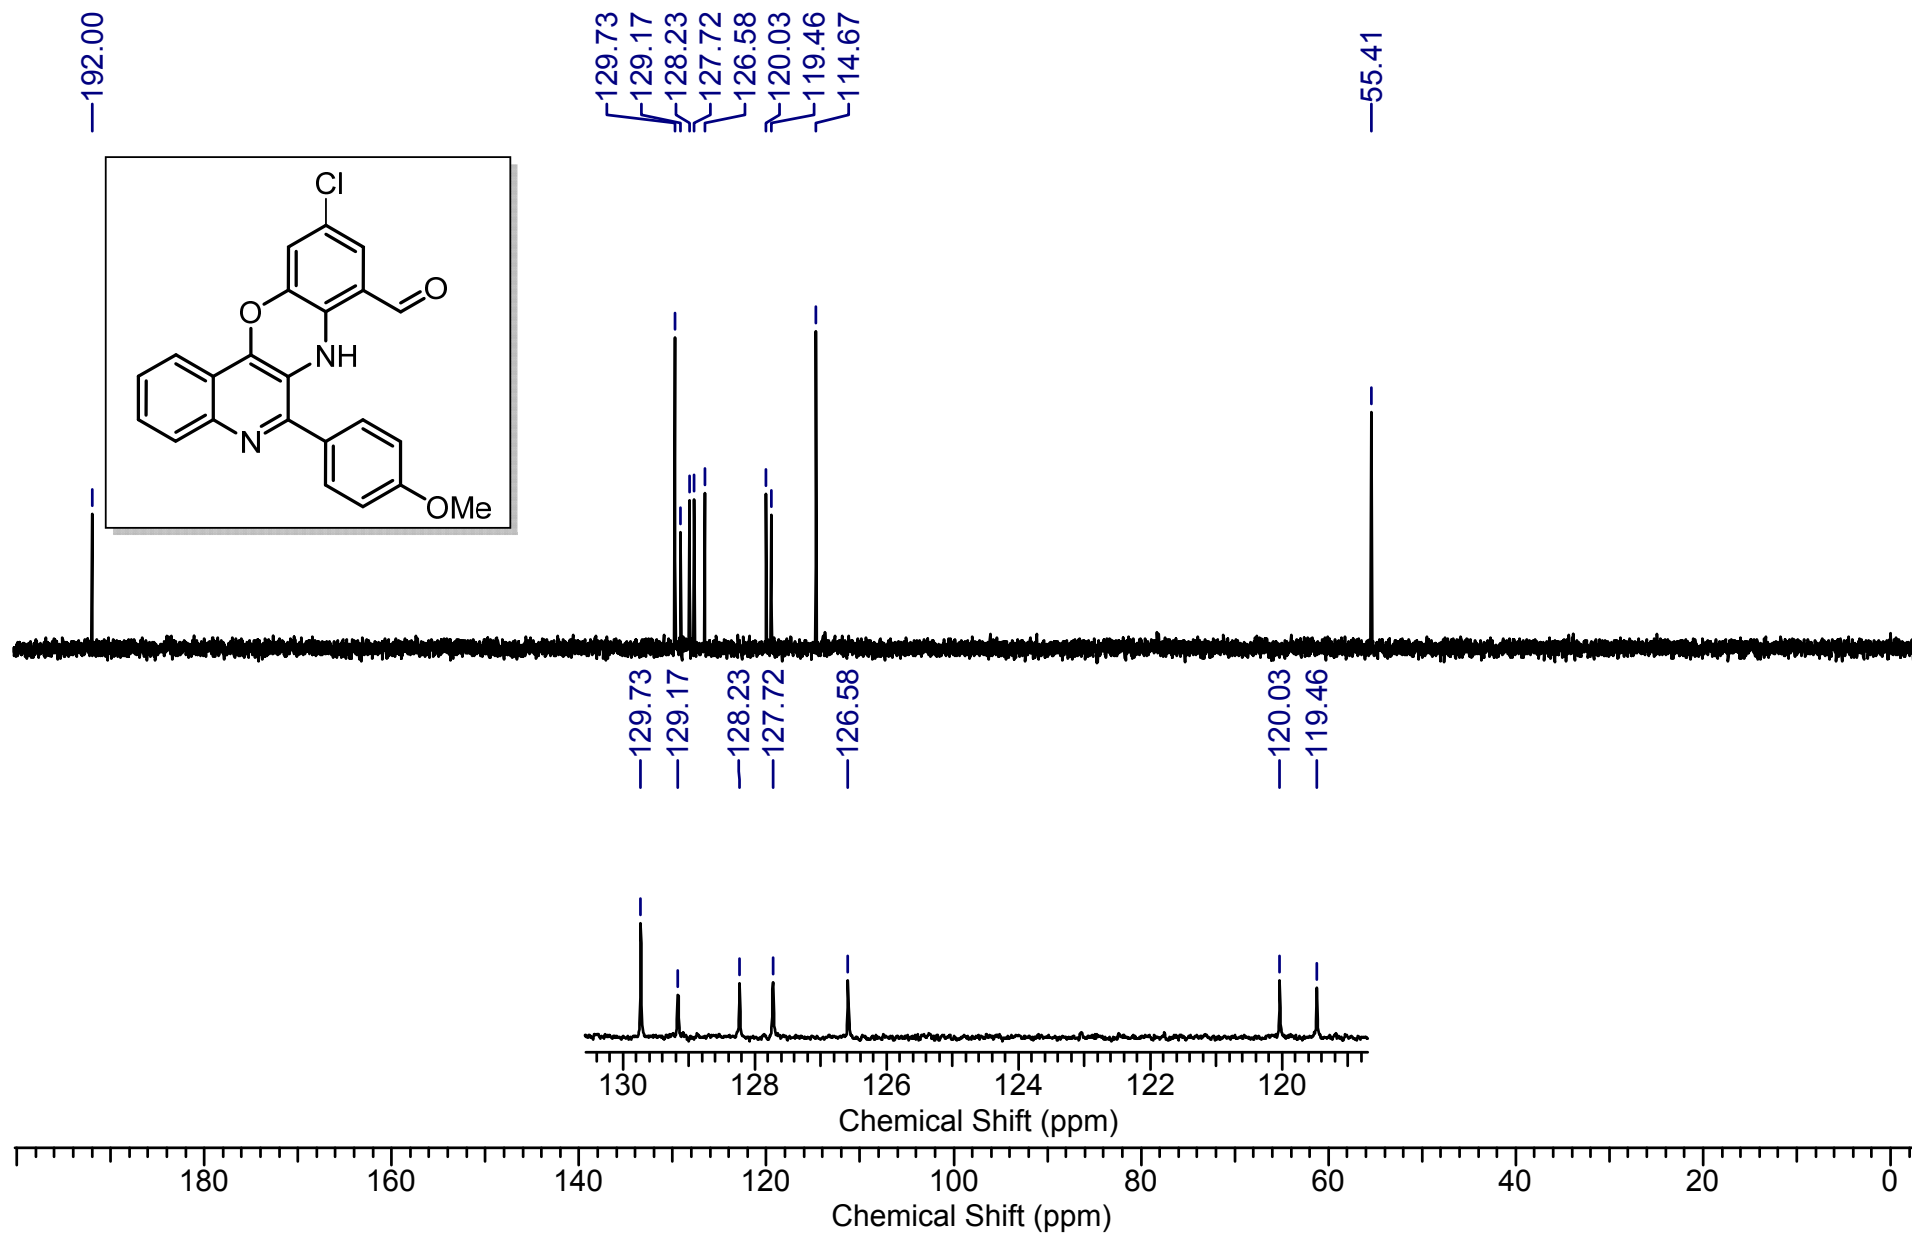



# 3fd

SH-615 #473 RT: 2.50 AV: 1 NL: 4.46E7  
T: FTMS + p ESI Full ms [100.0000-1500.0000]

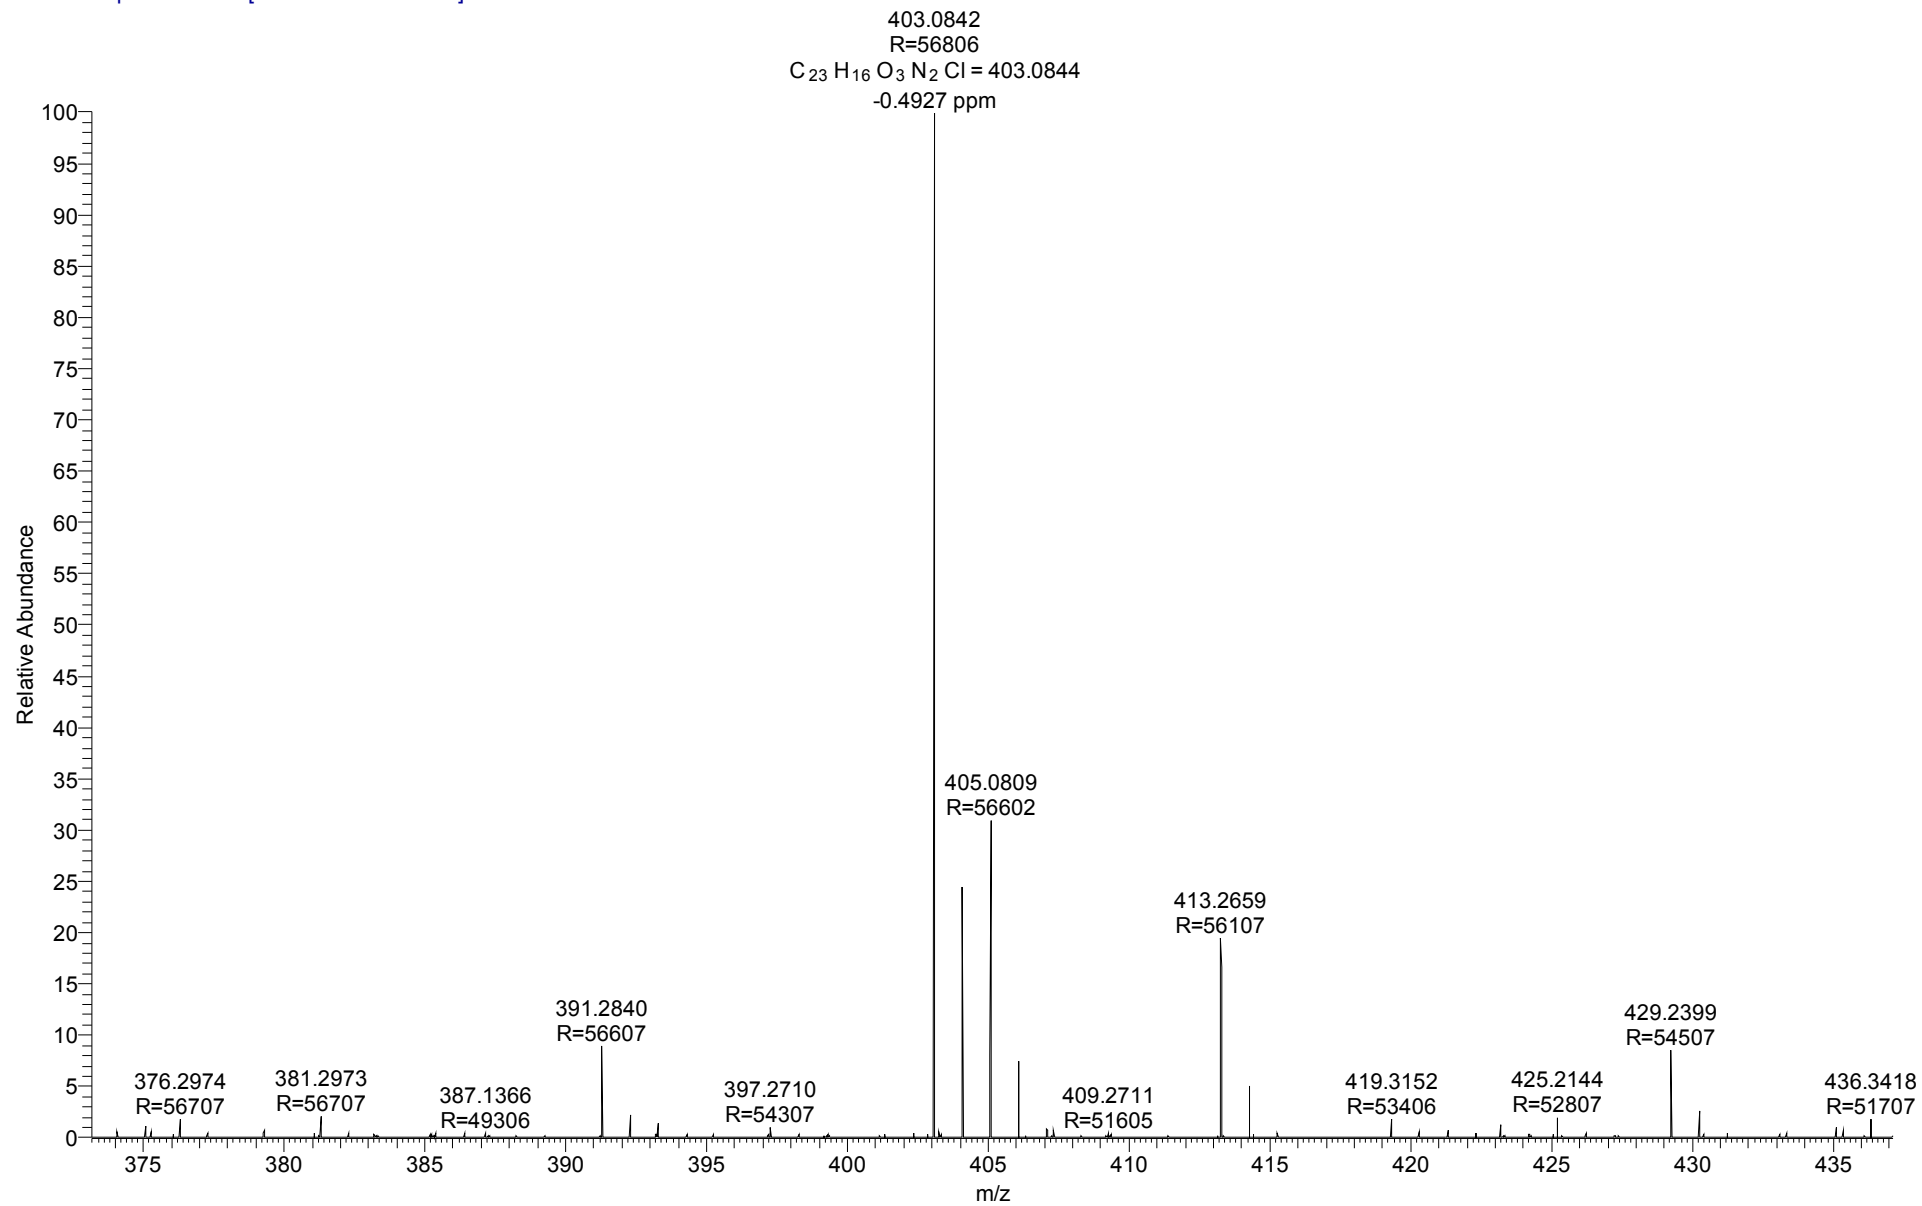

3fe

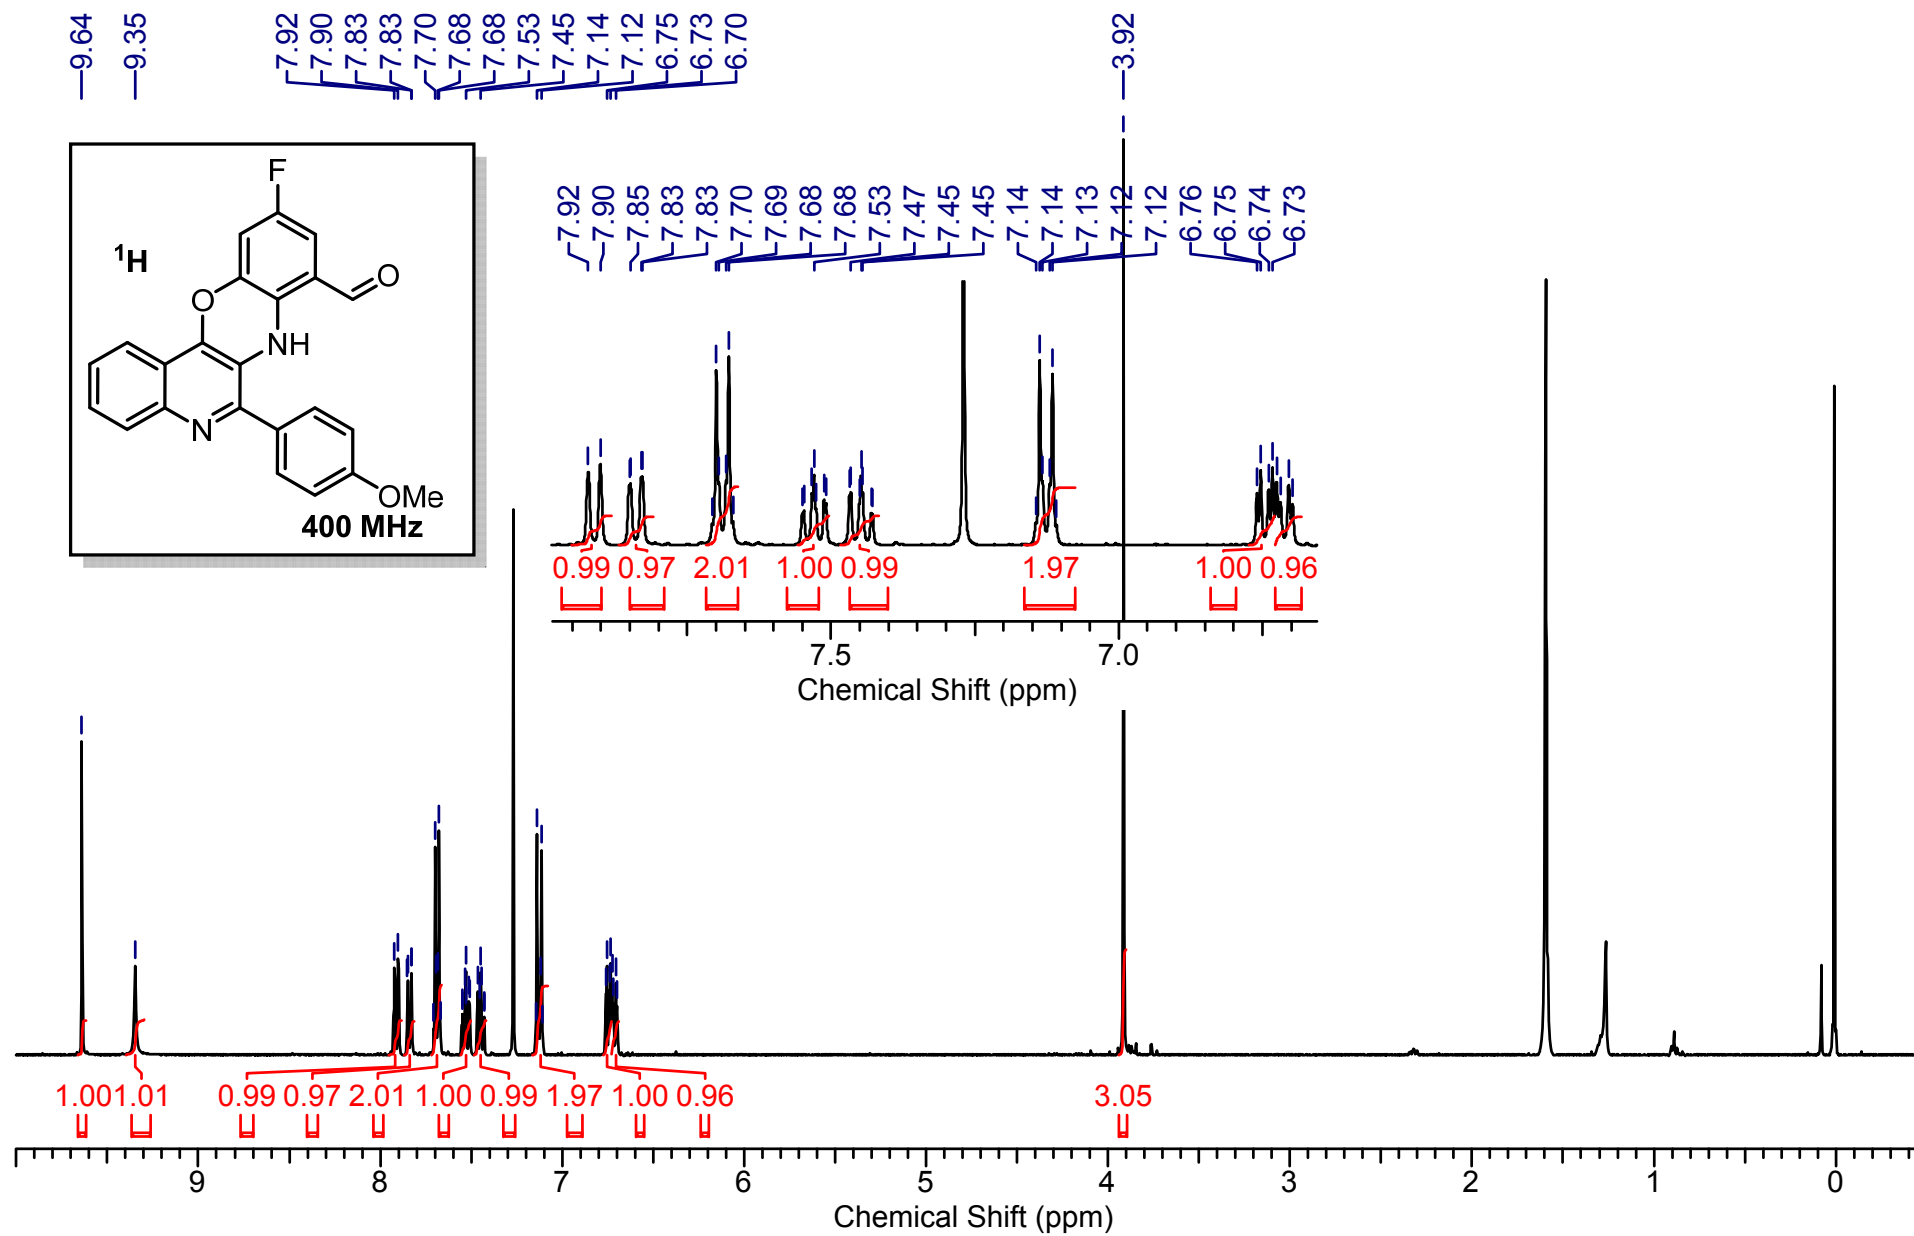

# 3fe

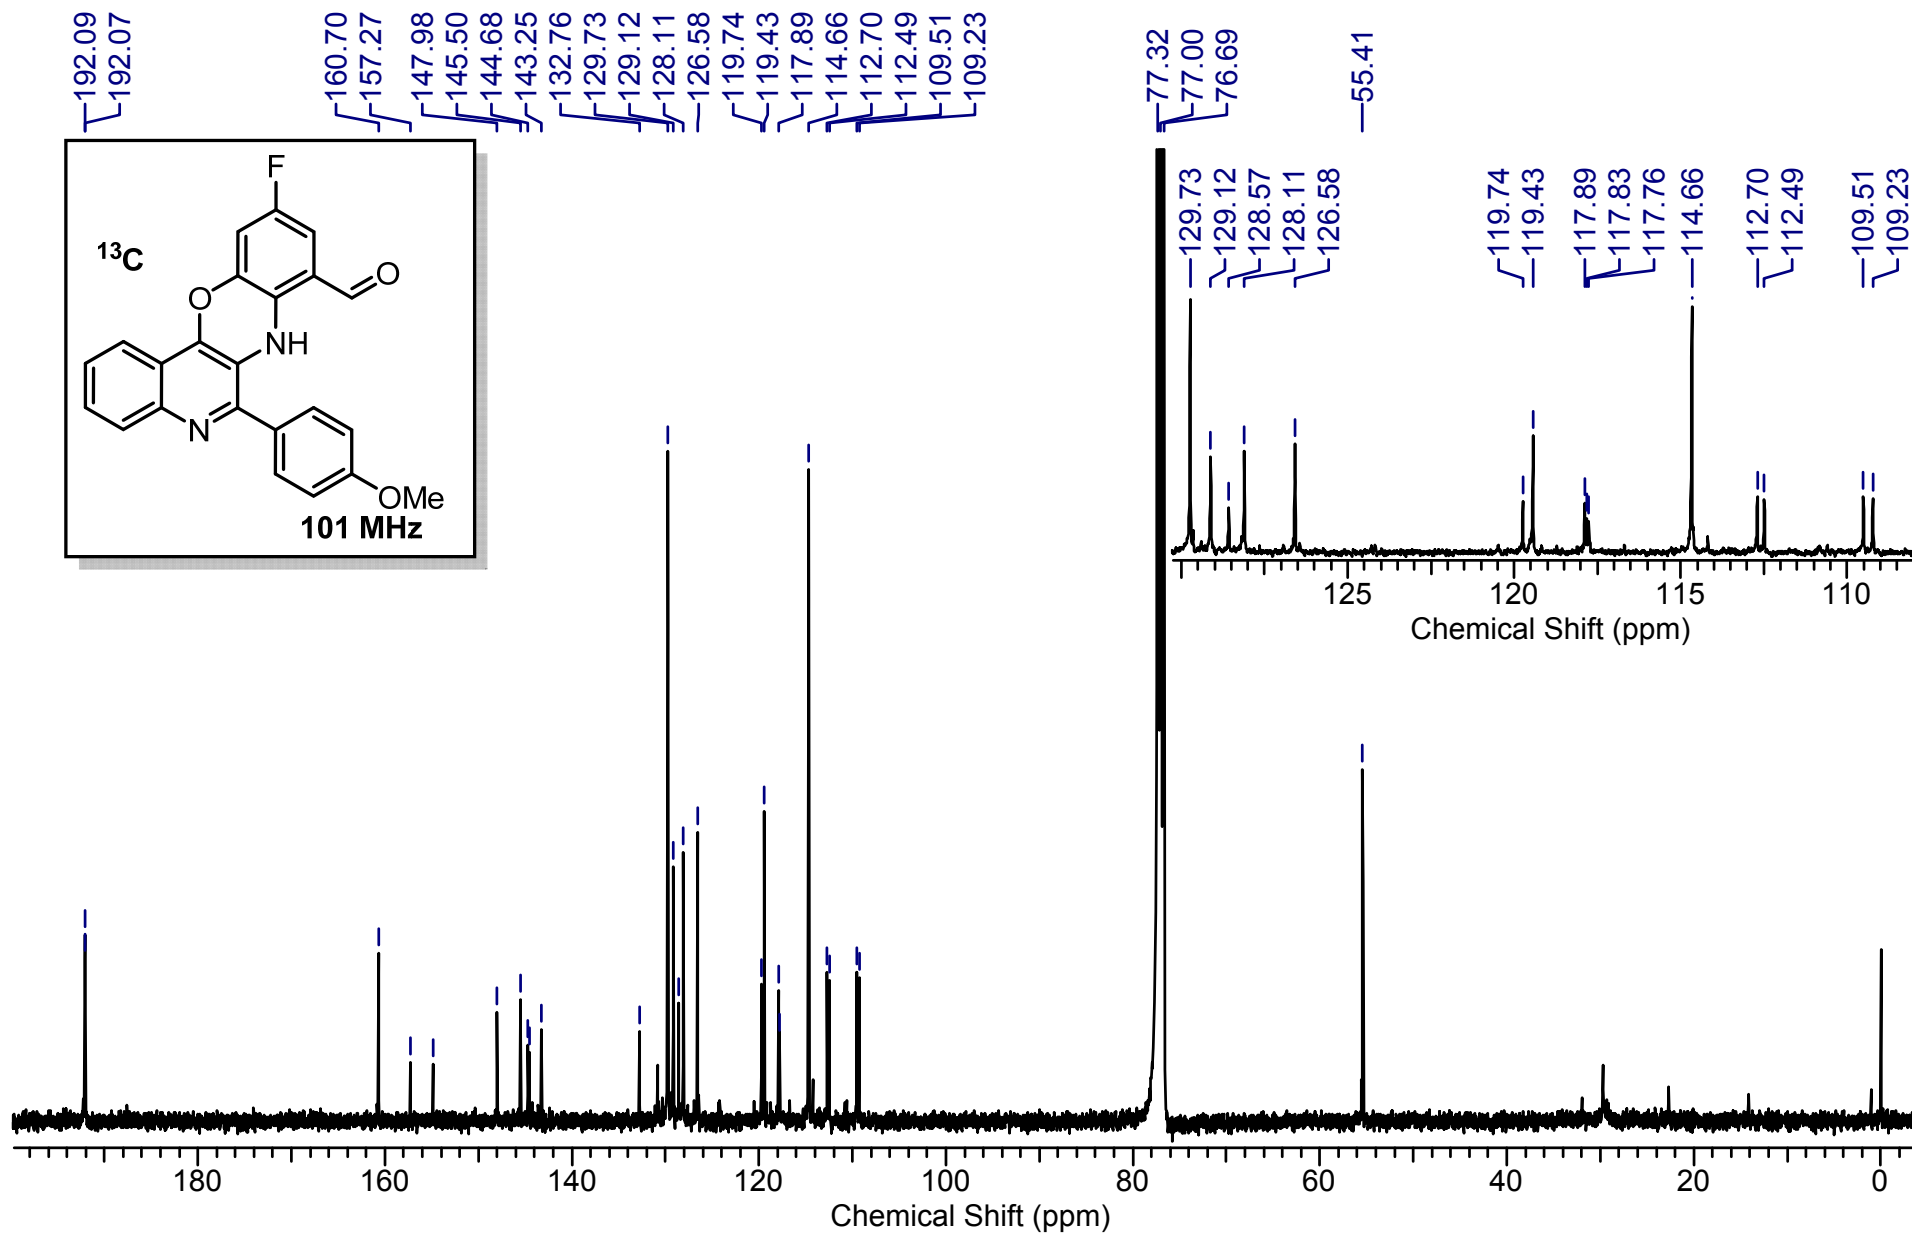

3fe

—192.09

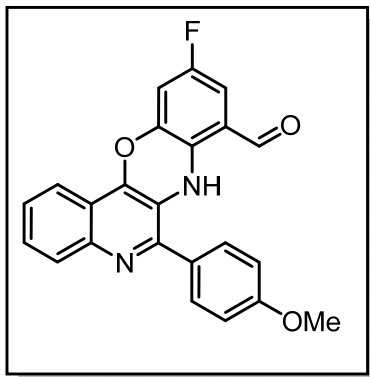

129.73  
129.17  
128.06  
126.56  
119.43  
114.66  
112.68  
112.47  
109.50  
109.22

—55.41

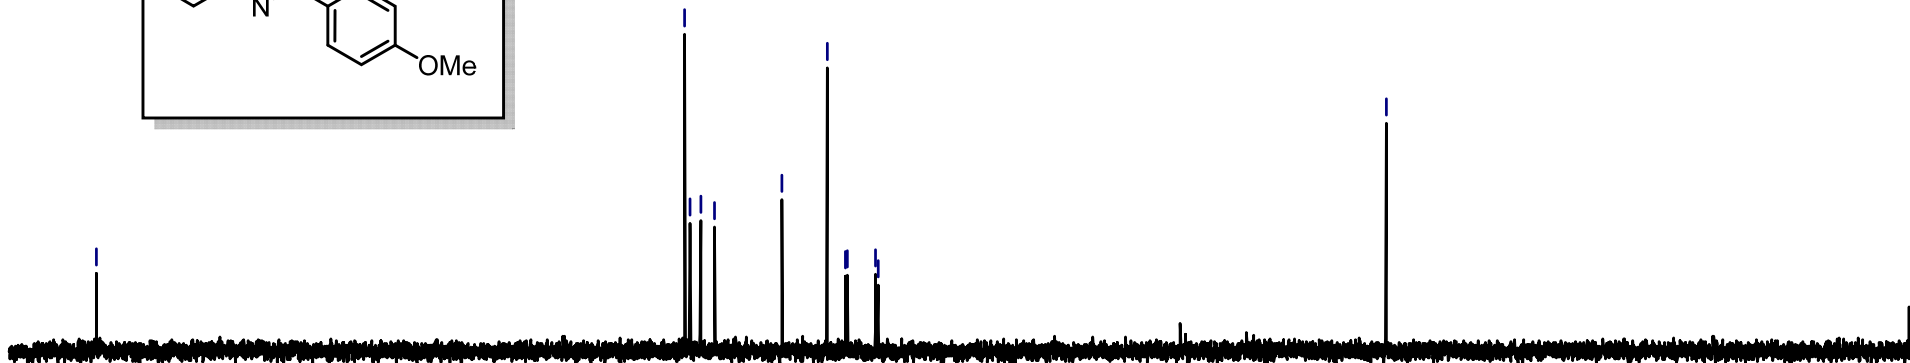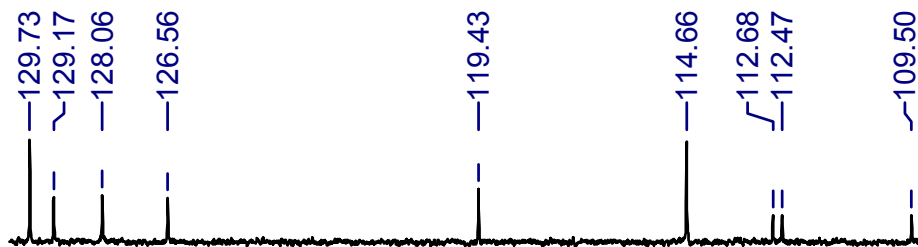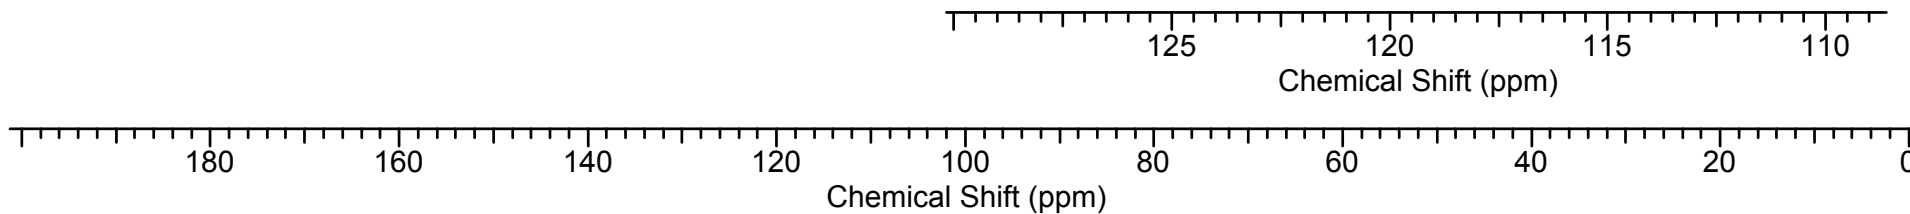

3fe

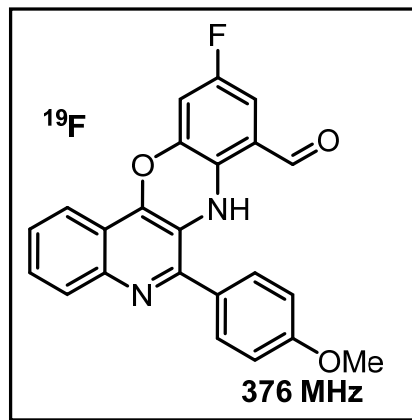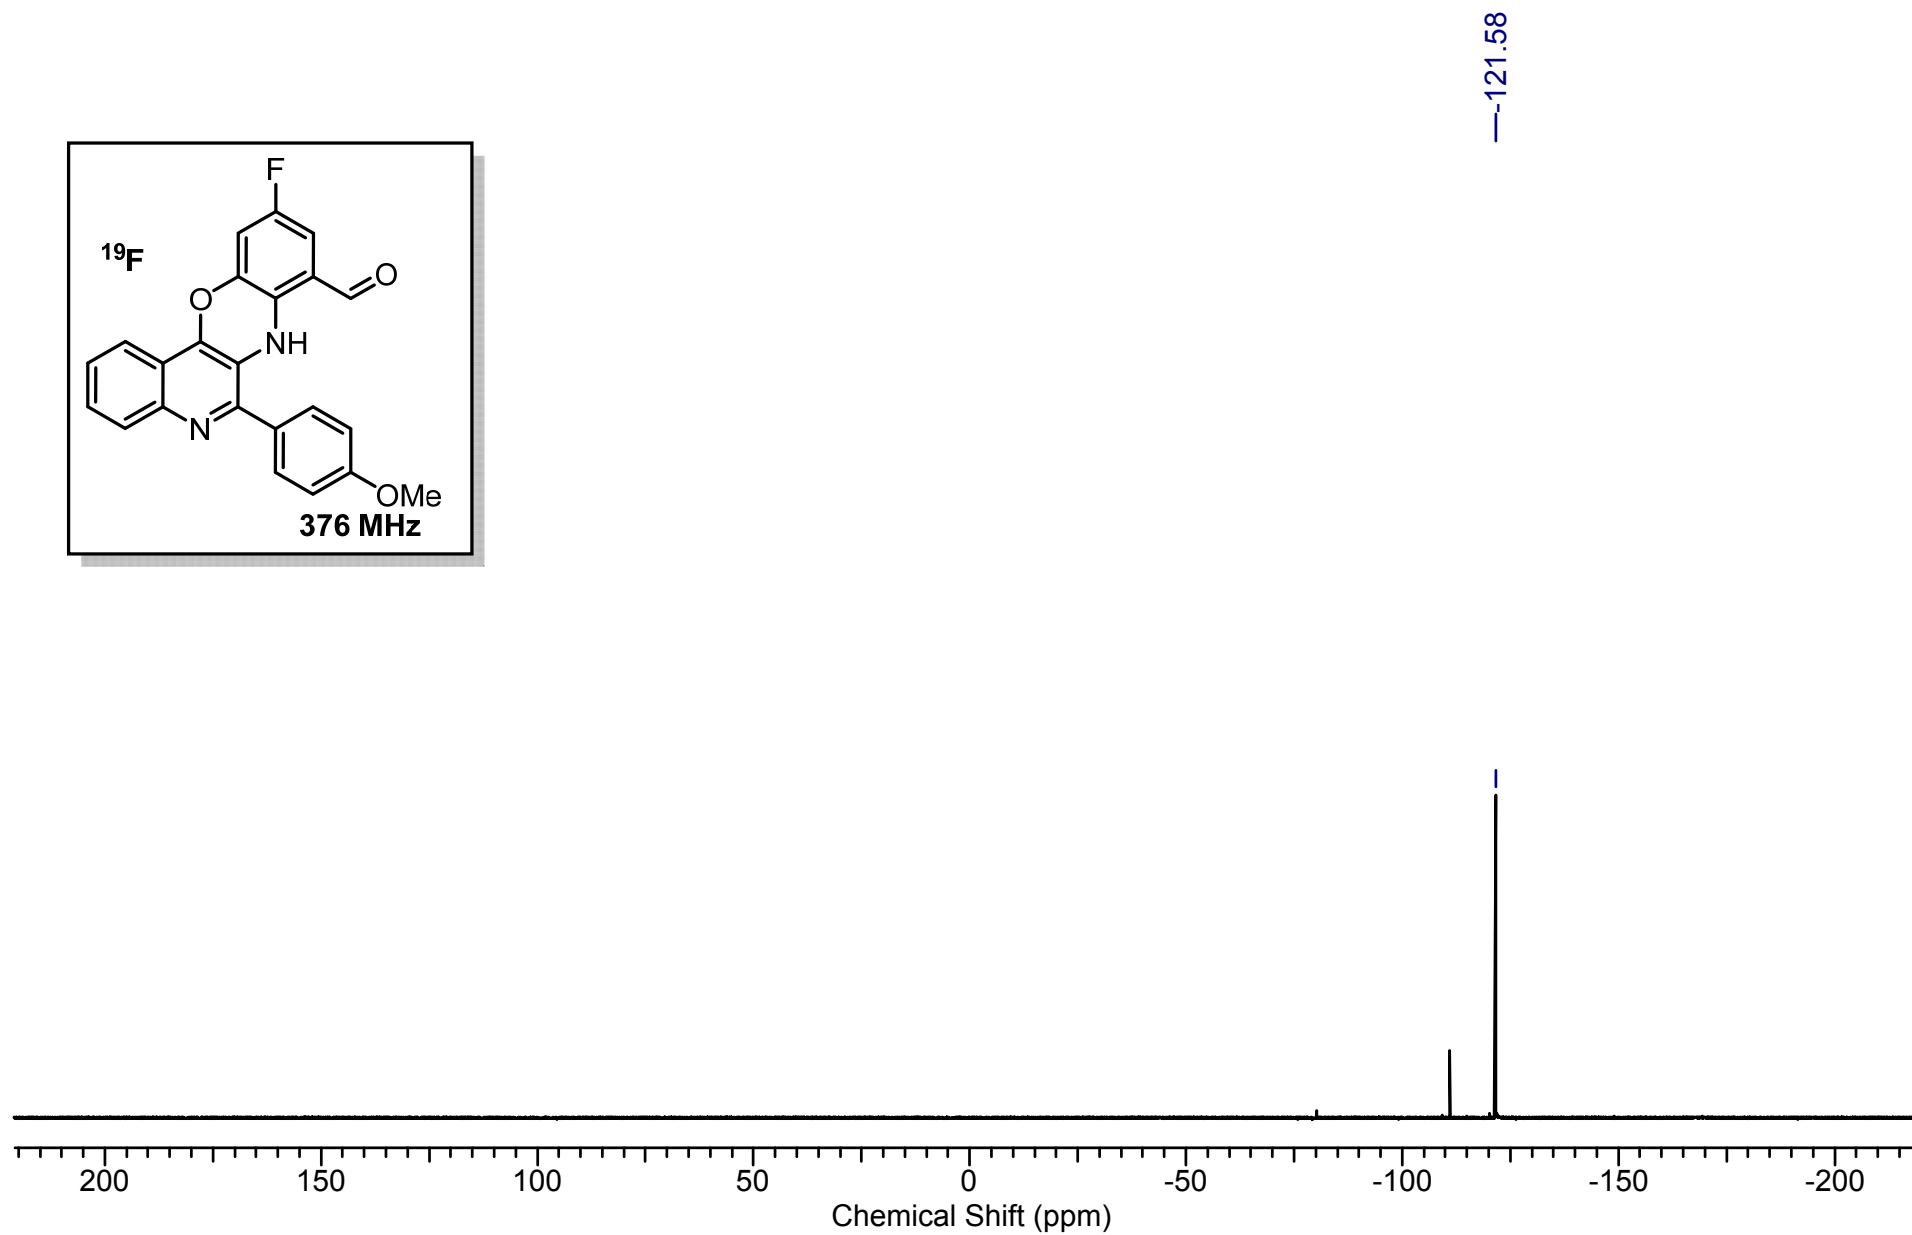

# 3fe

SH-624 #368 RT: 1.98 AV: 1 NL: 4.05E6  
T: FTMS + p ESI Full ms [100.0000-1500.0000]

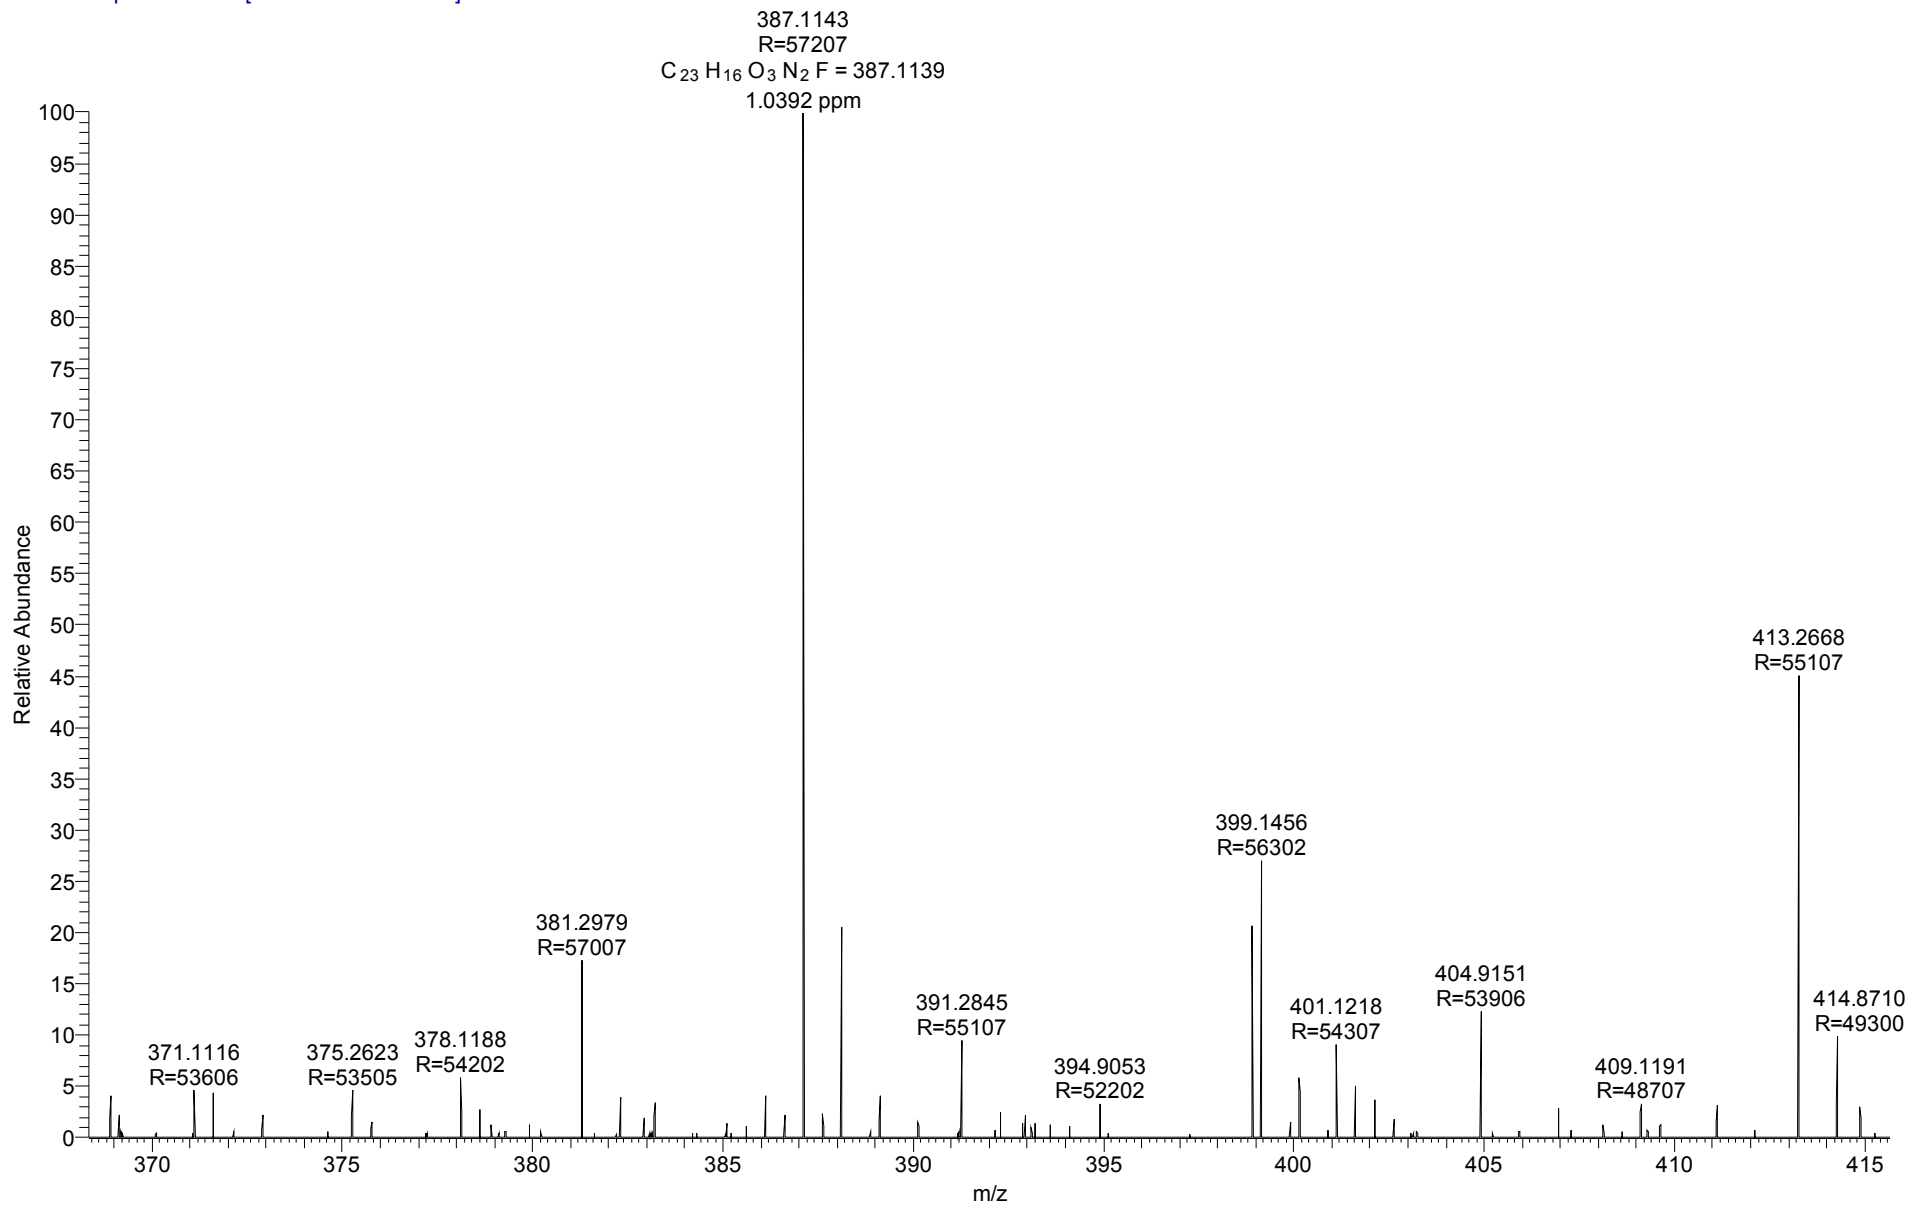

# 3fh

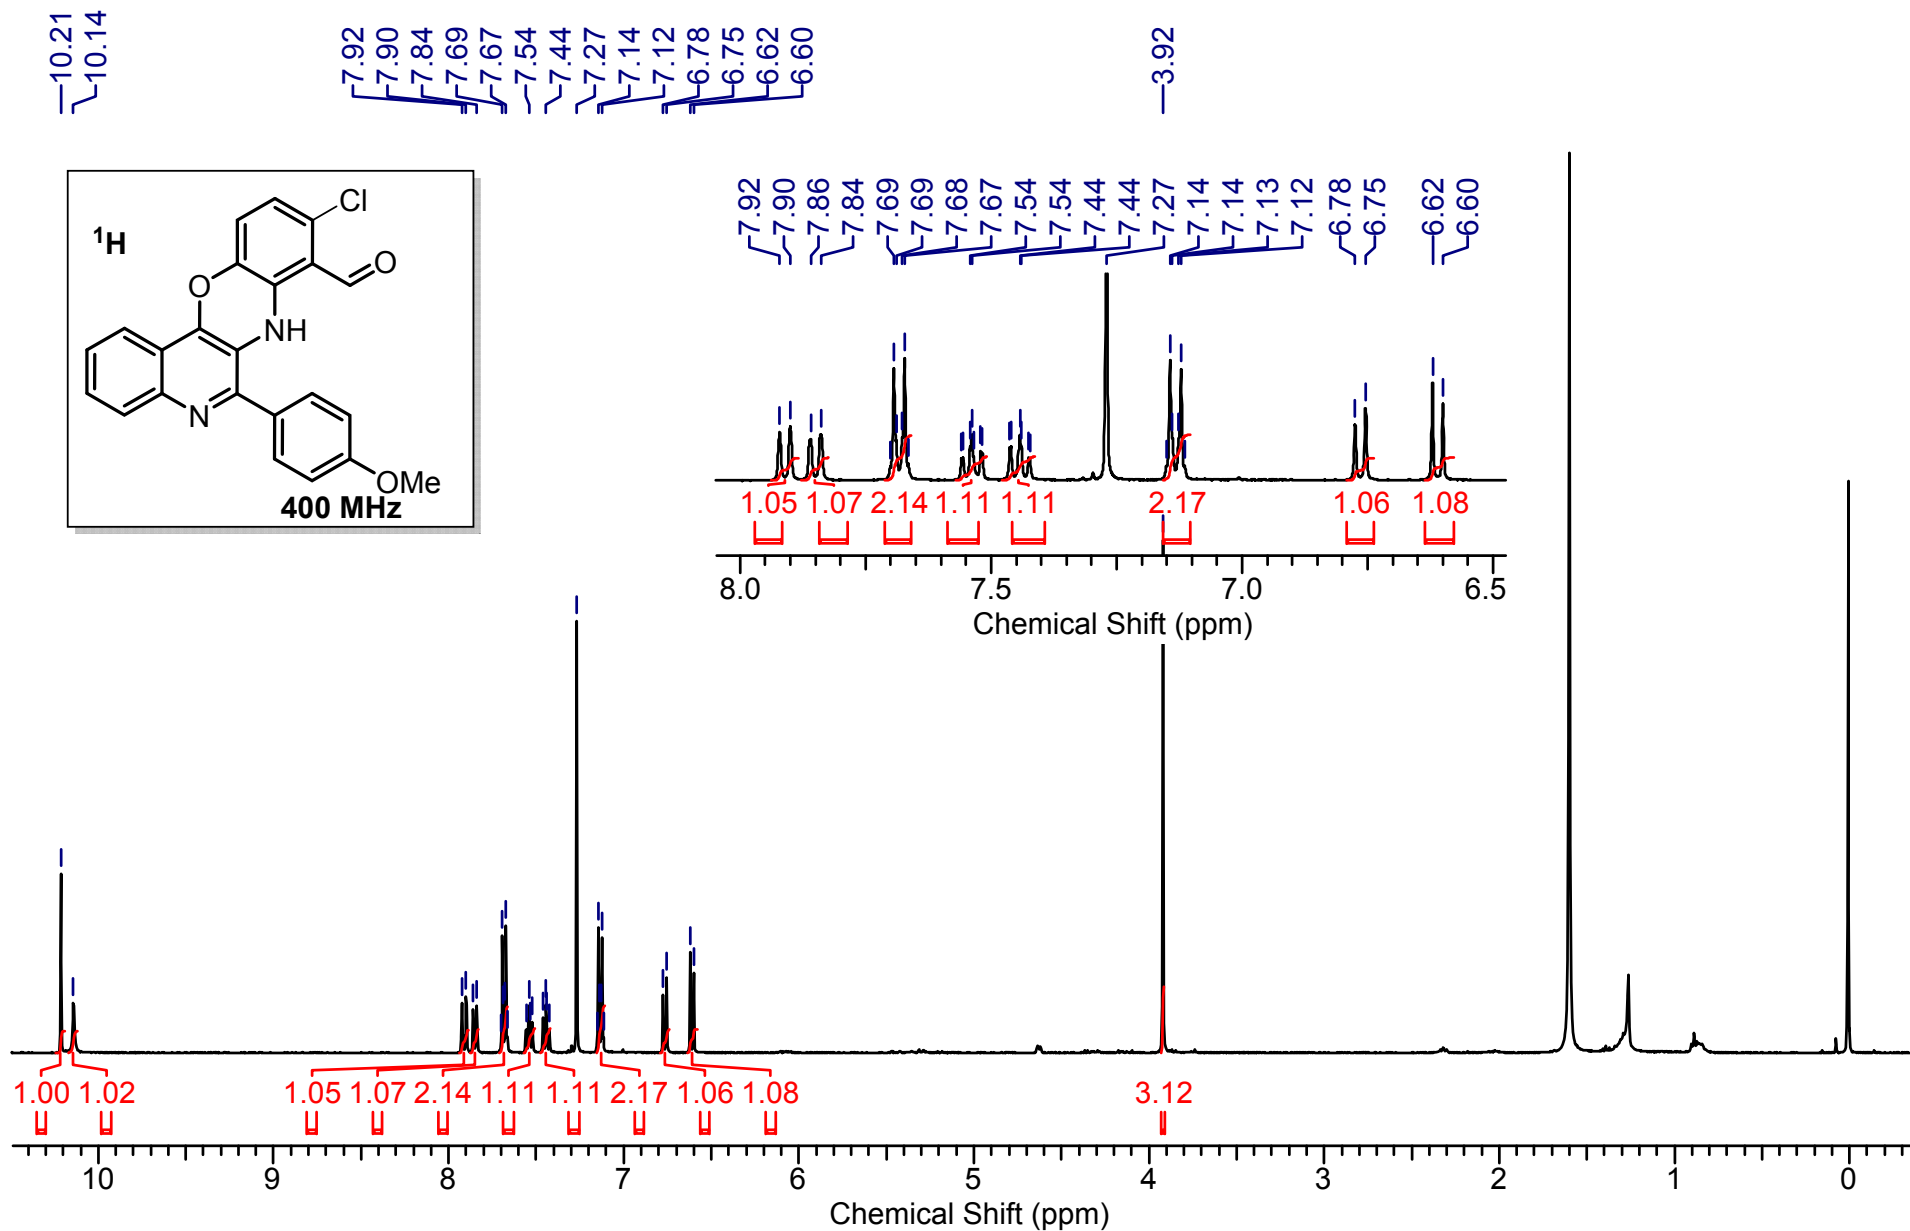

3fh

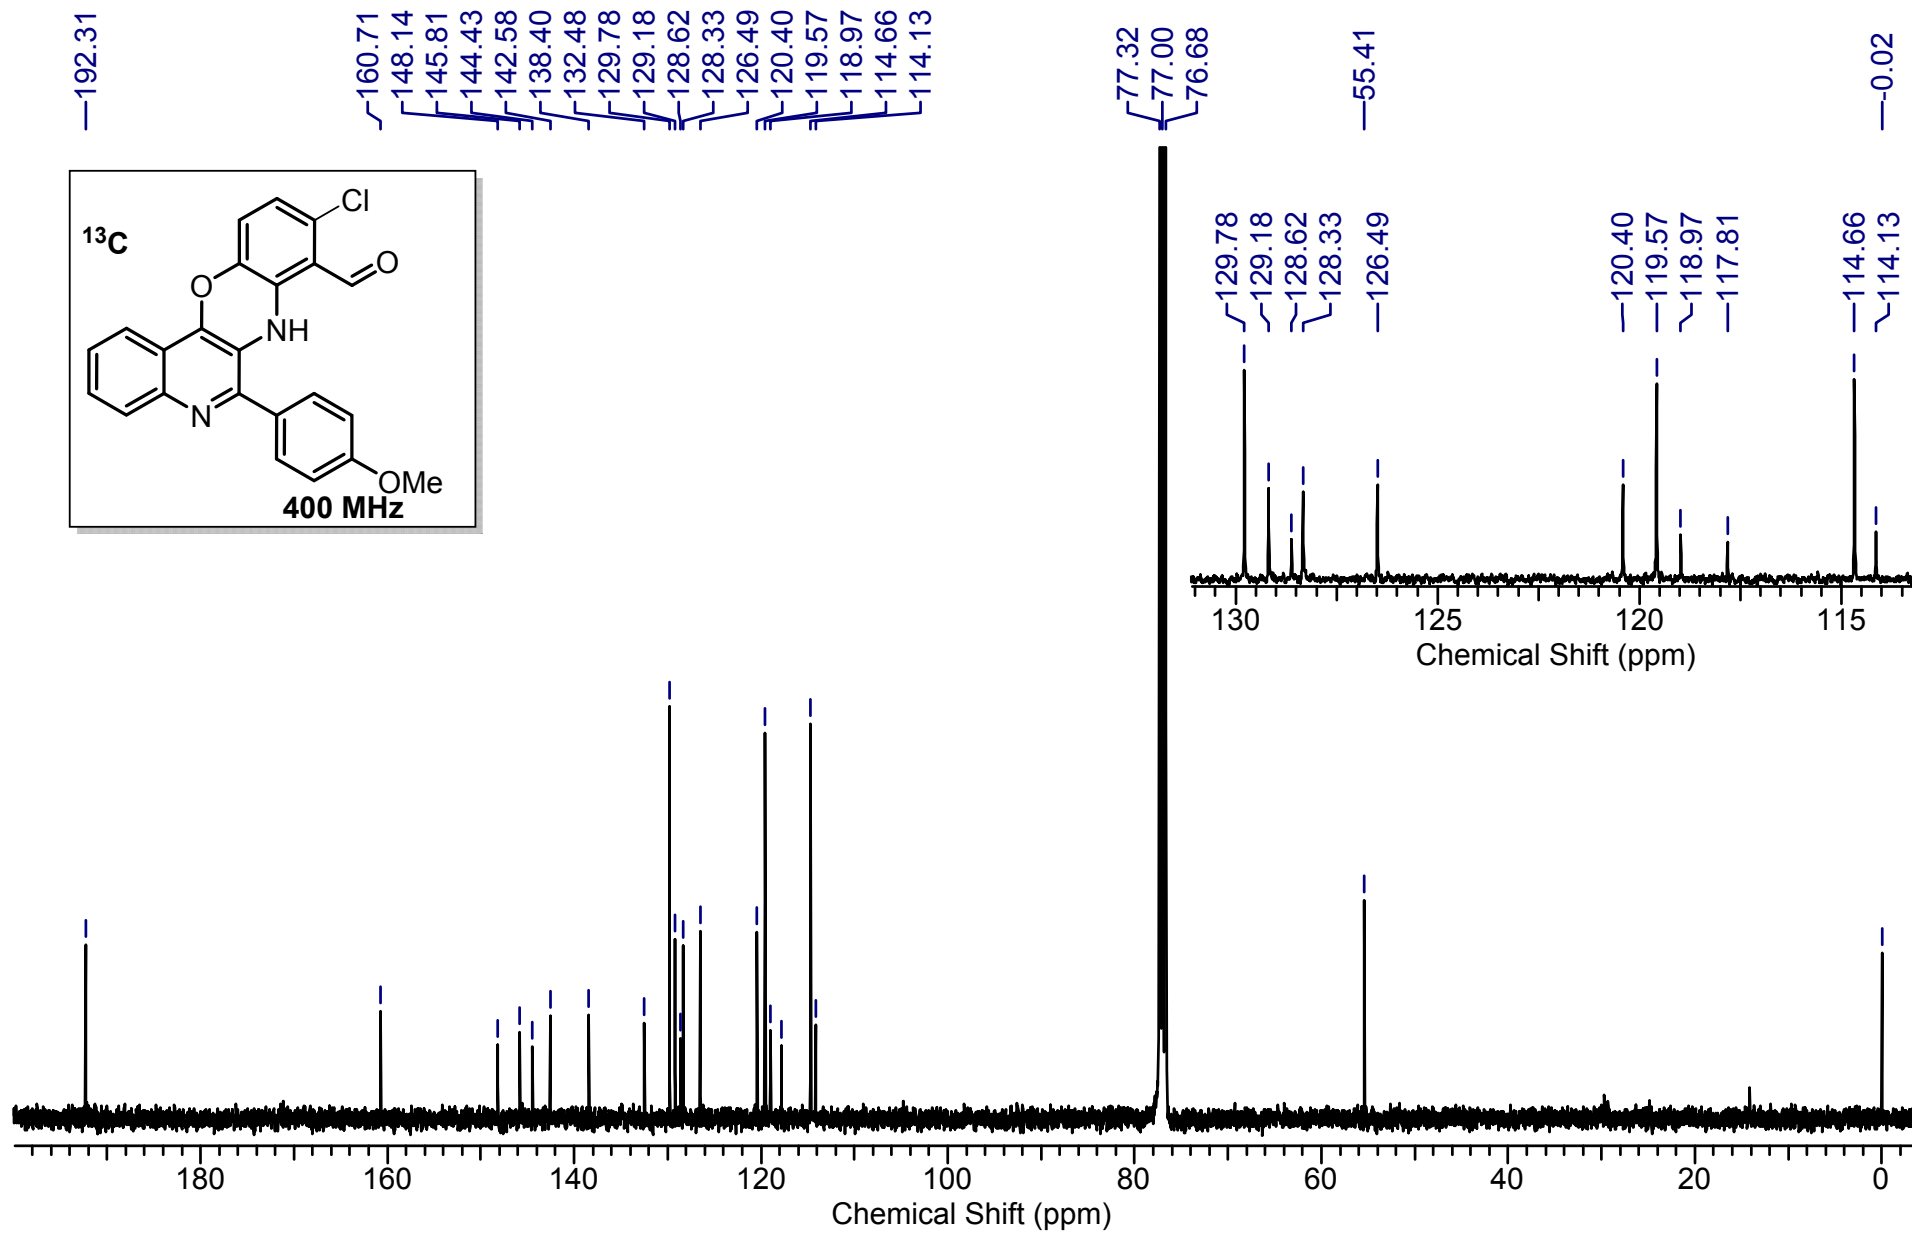



3fh

—192.31

129.78  
129.17  
128.33  
126.49  
120.41  
119.57  
114.66

—55.42

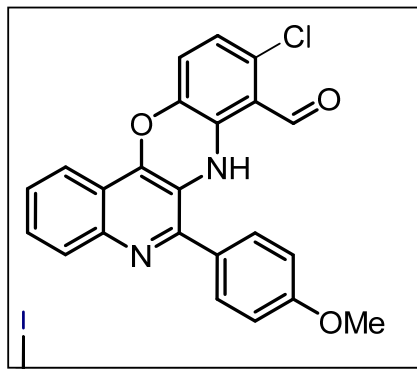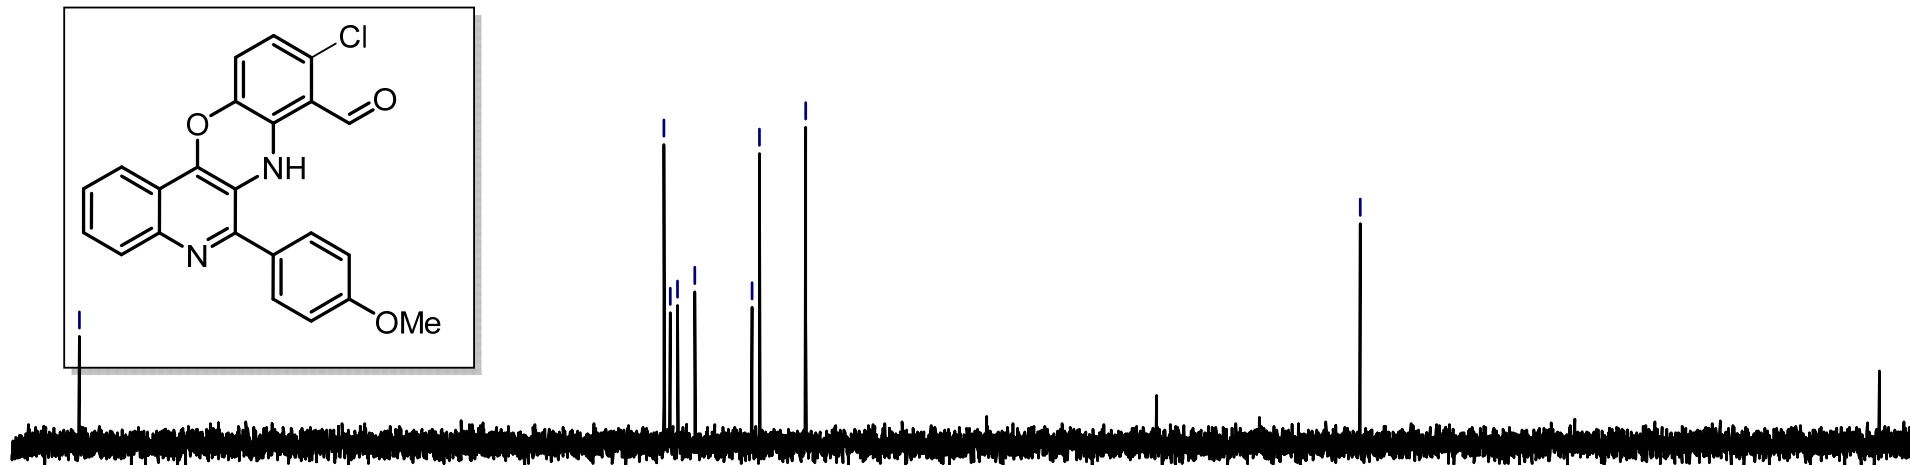

~129.78

~129.17

~128.33

—126.49

~120.41

—119.57

—114.66

130

Chemical Shift (ppm)

125

120

115

180

160

140

Chemical Shift (ppm)

100

80

60

40

20

0

# 3fh

SH-616 #473 RT: 2.51 AV: 1 NL: 2.46E7  
T: FTMS + p ESI Full ms [100.0000-1500.0000]

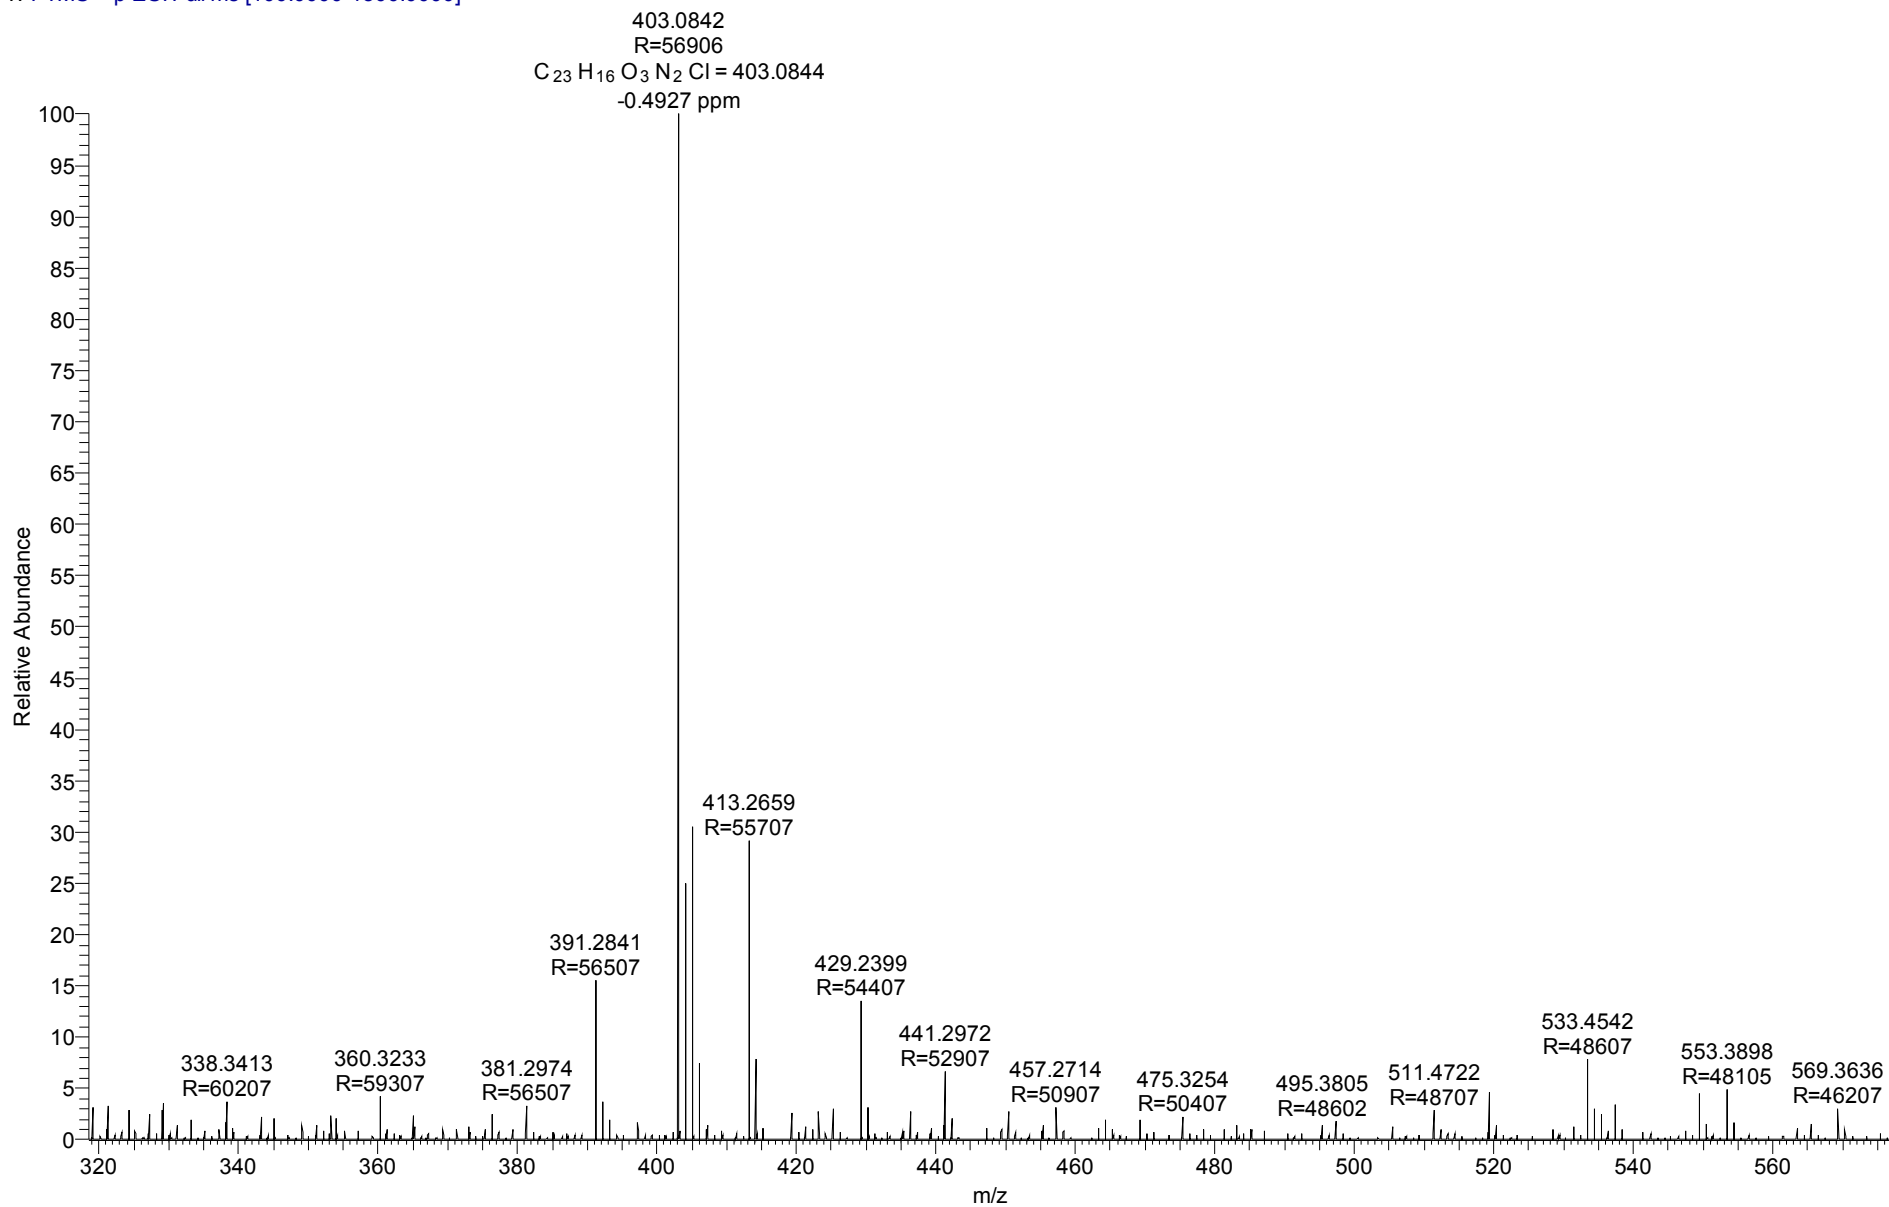

3fi

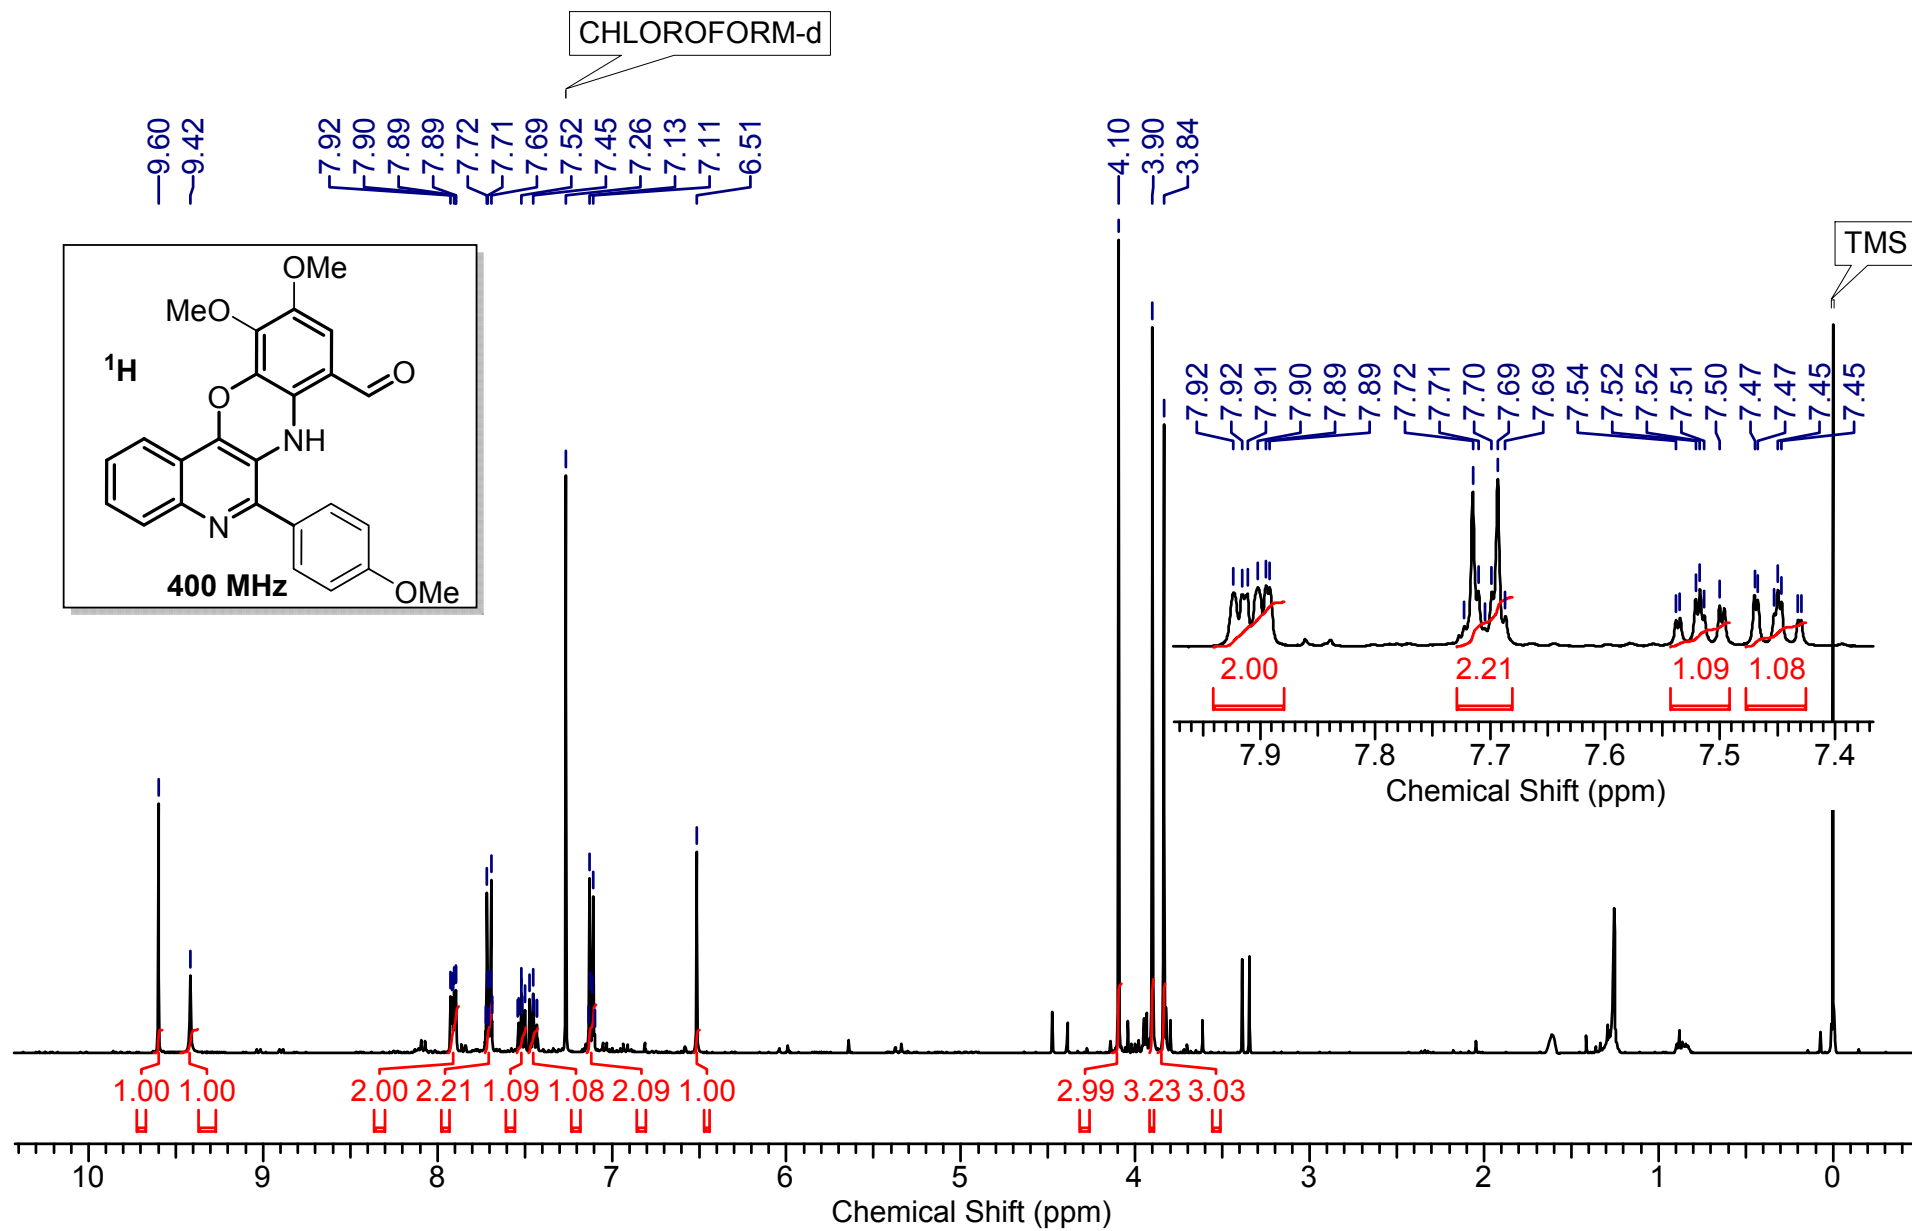

3fi

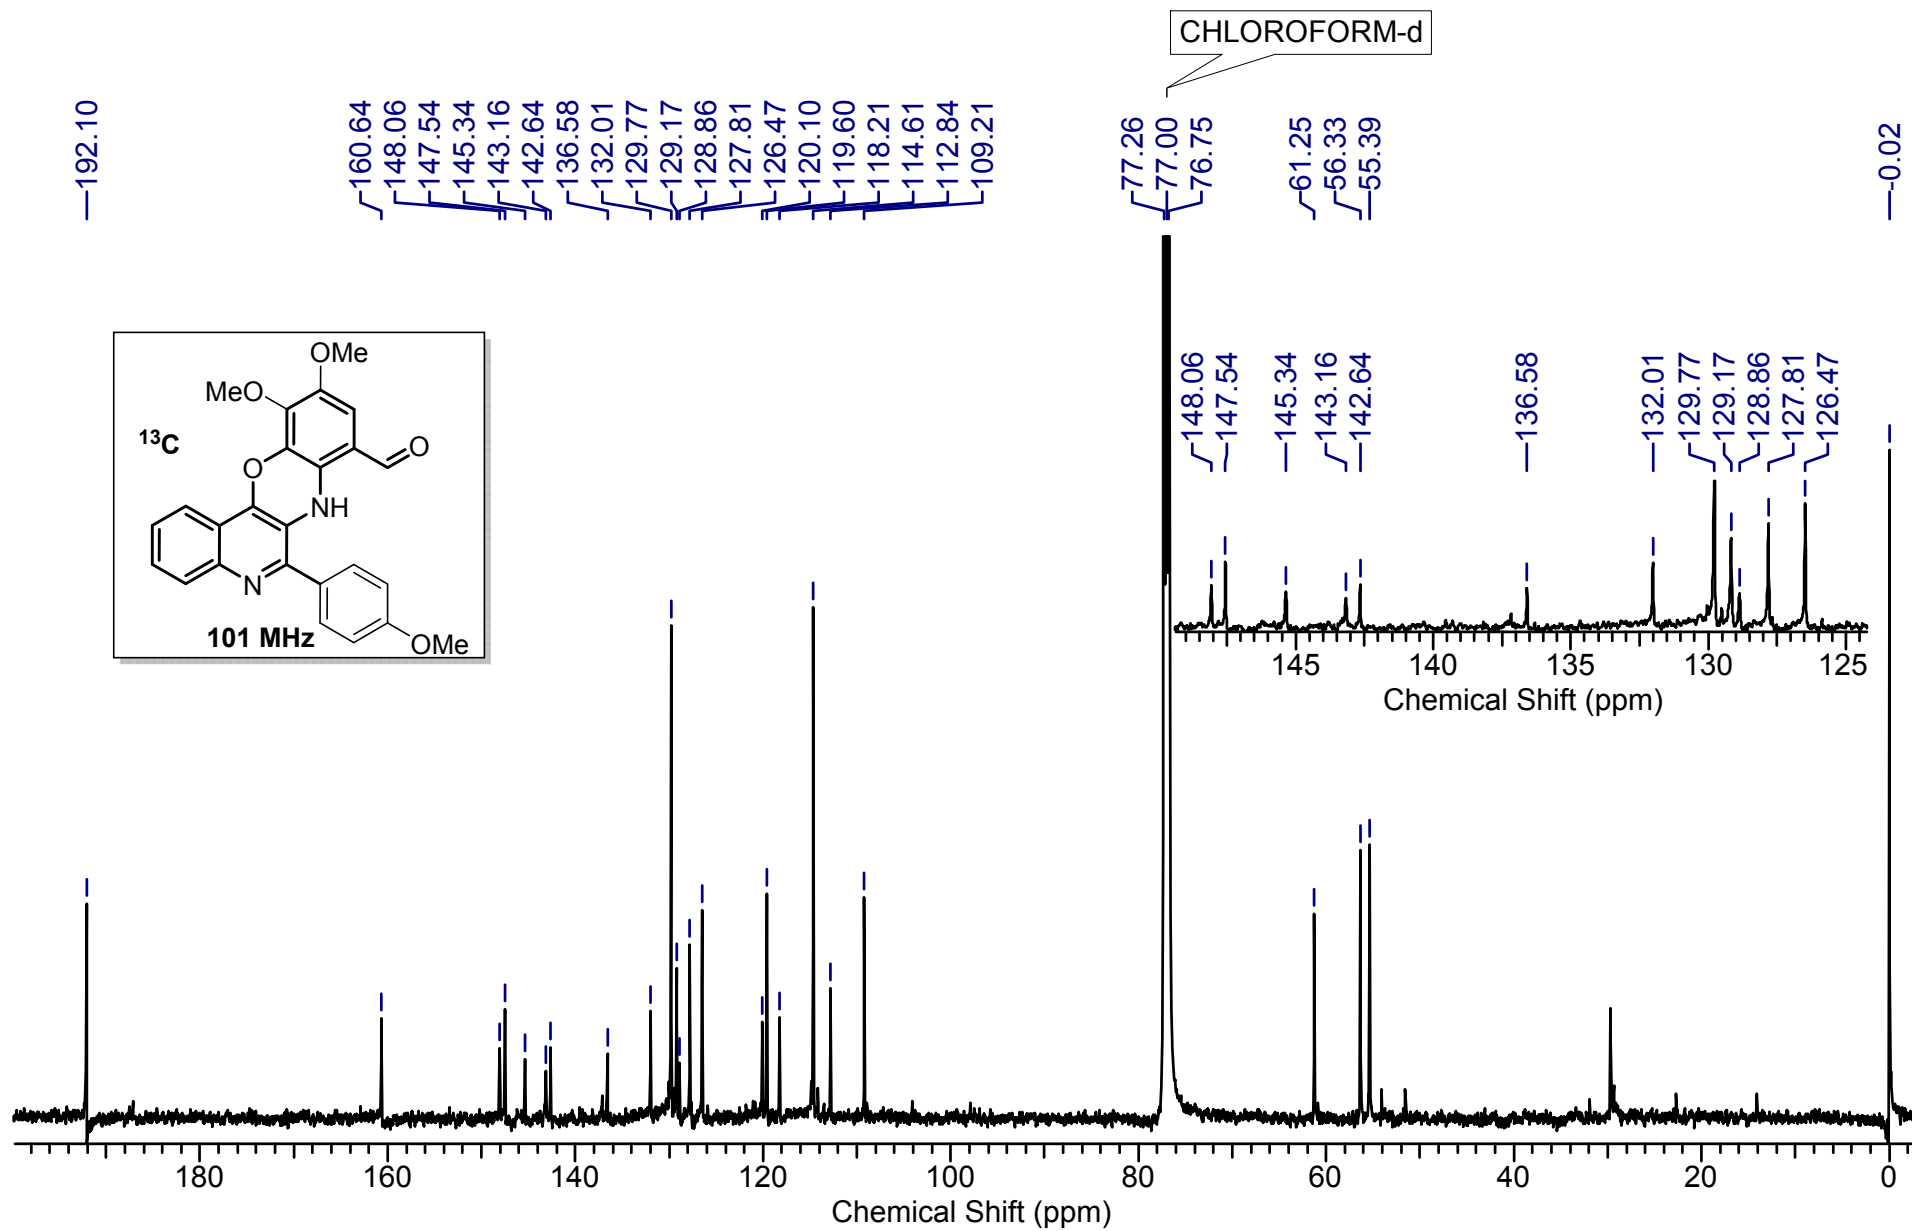

3fi

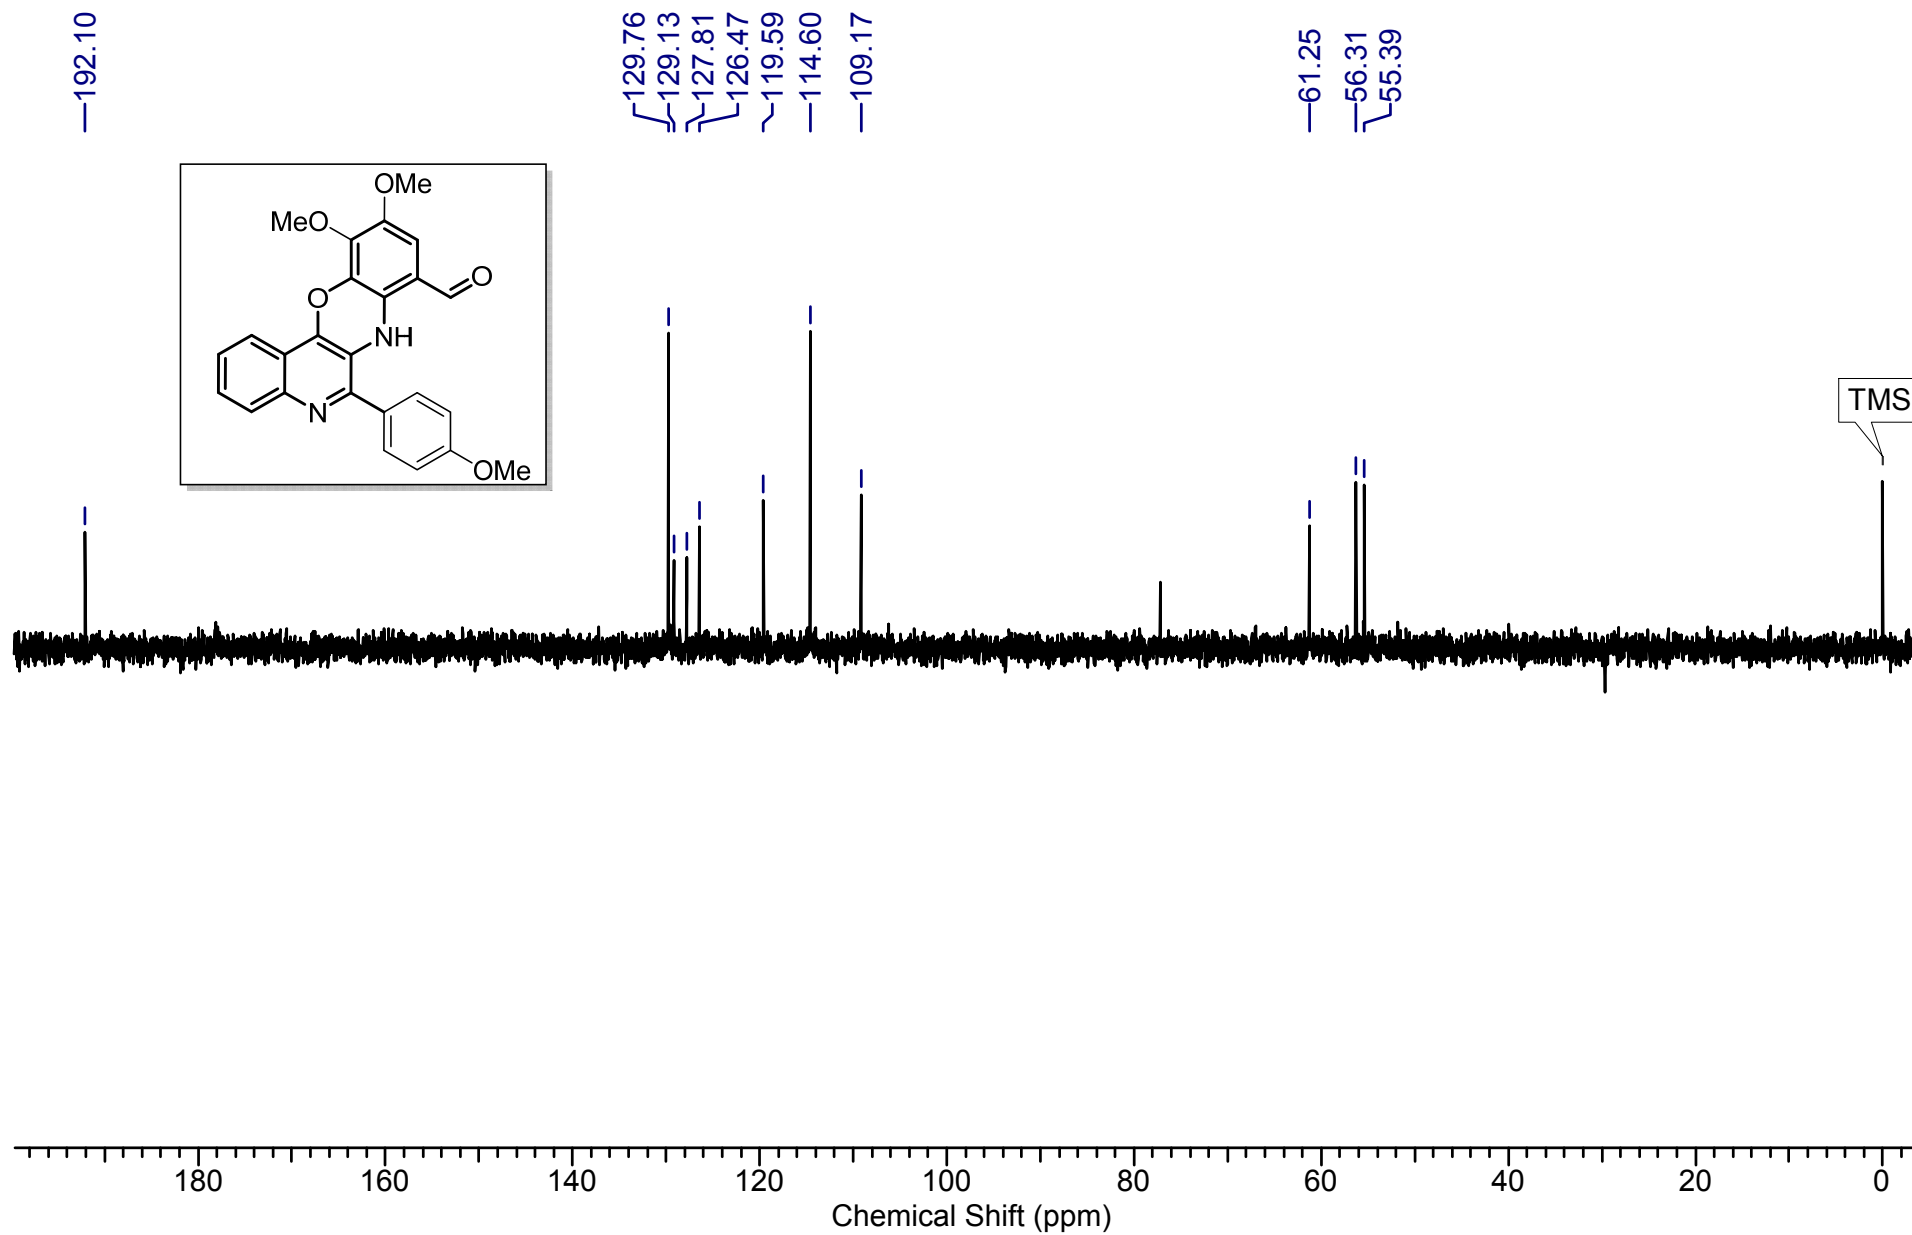

# 3fi

TRIMETHOXY#356 RT: 1.62 AV: 1 NL: 2.11E7  
T: FTMS + p ESI Full ms [100.0000-1500.0000]

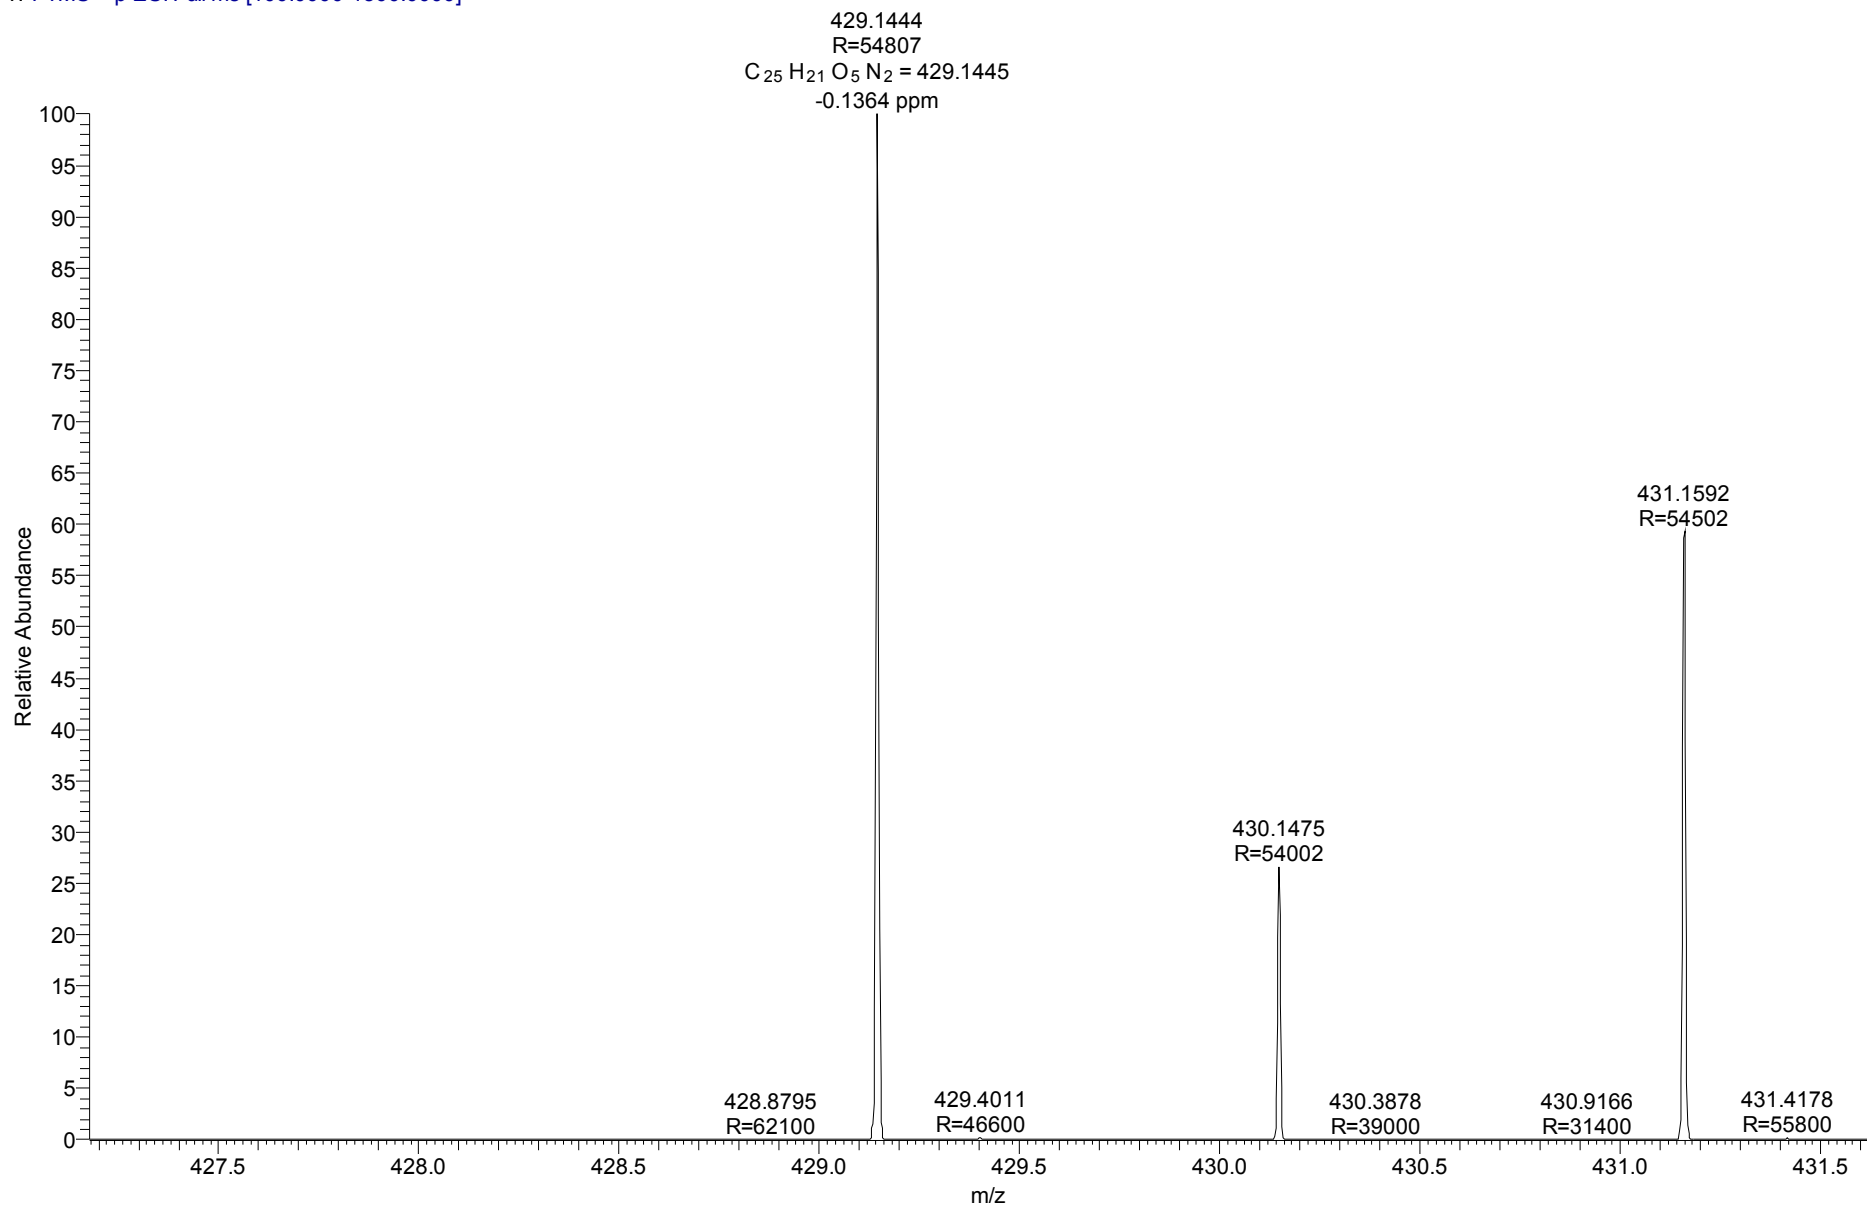

3gb

9.65  
9.59  
7.96  
7.94  
7.93  
7.91  
7.69  
7.67  
7.63  
7.61  
7.54  
7.47  
7.27  
6.89  
6.88

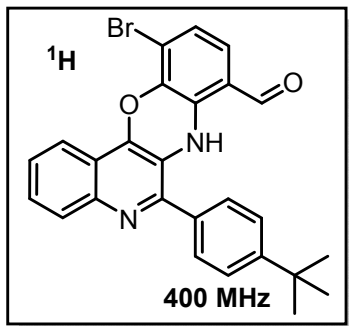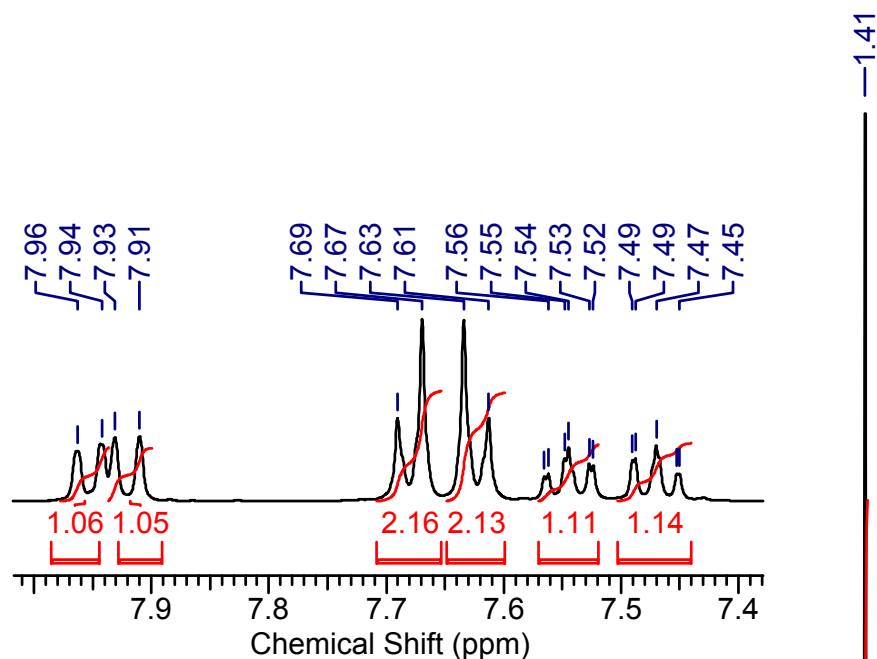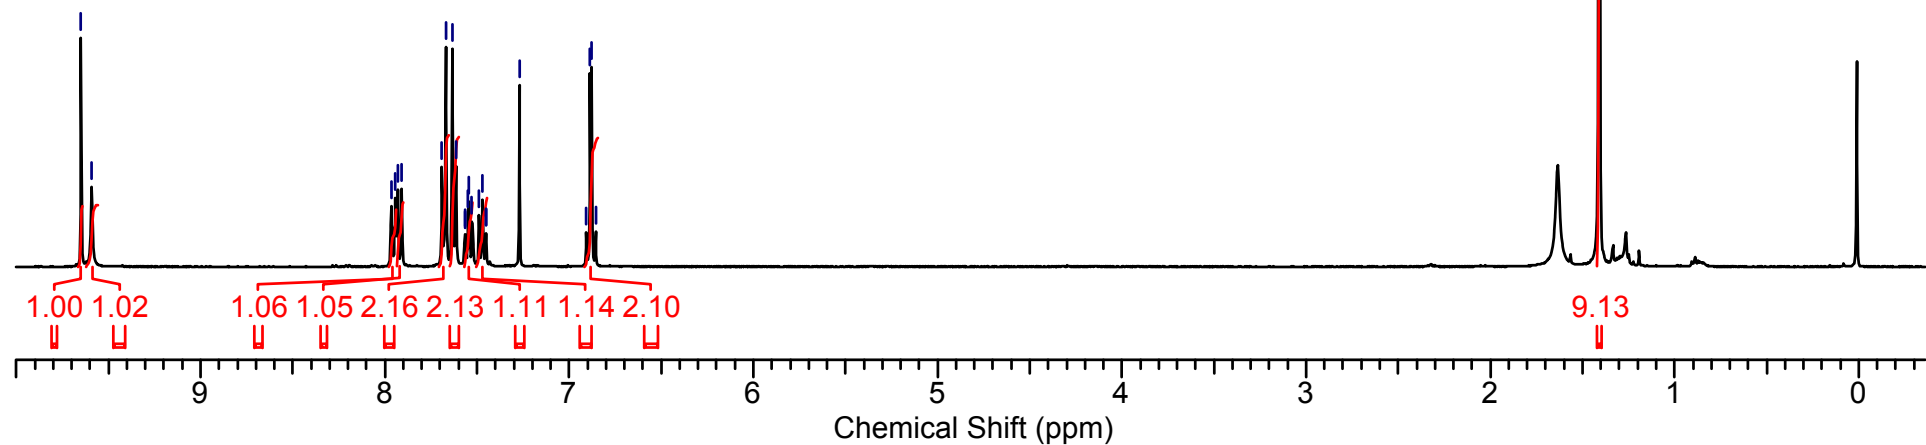

3gb

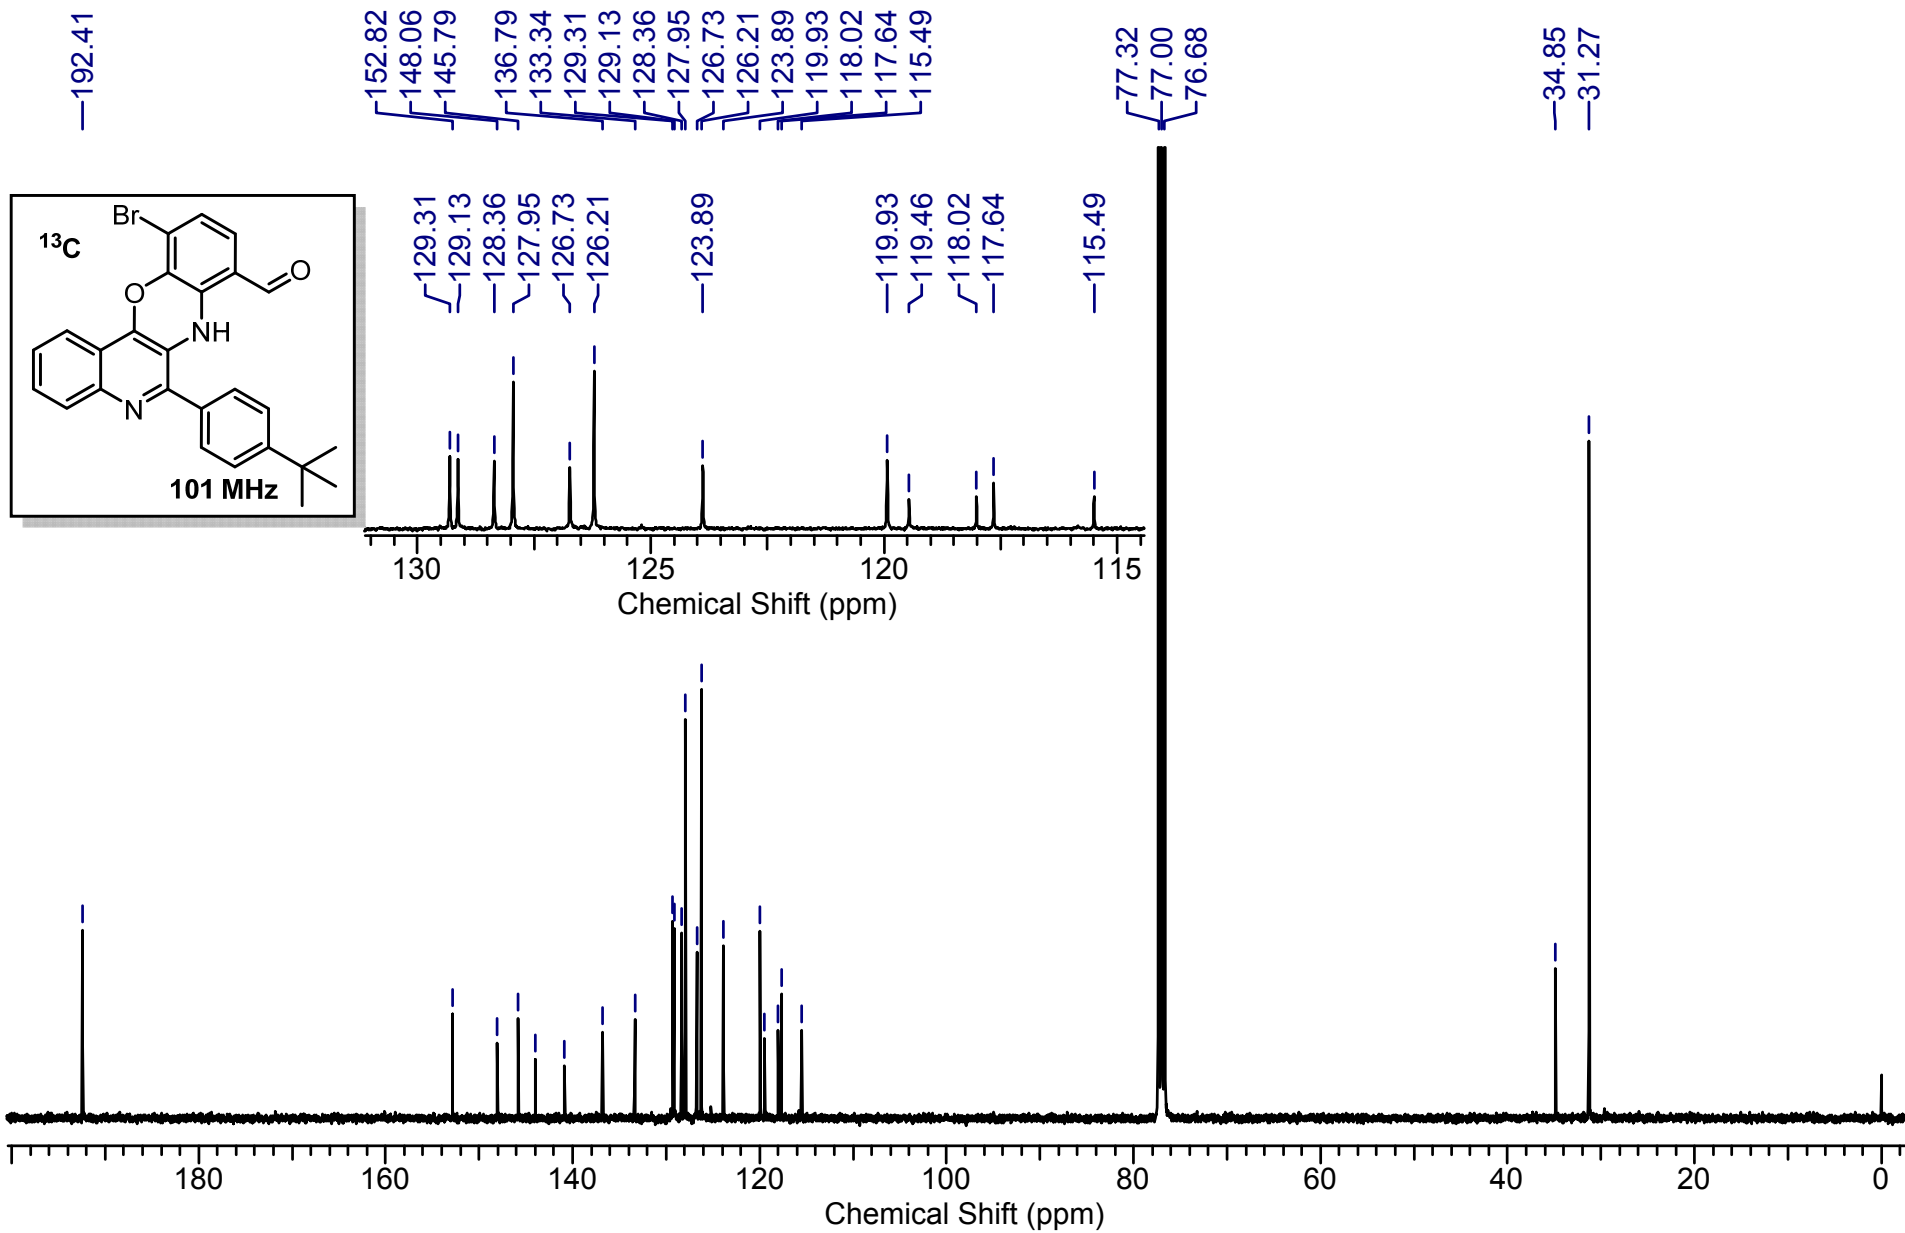



3gb

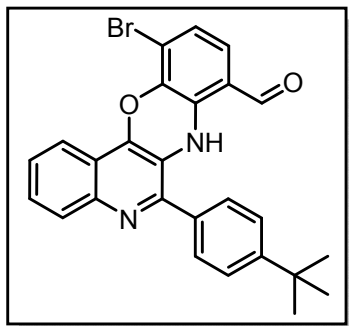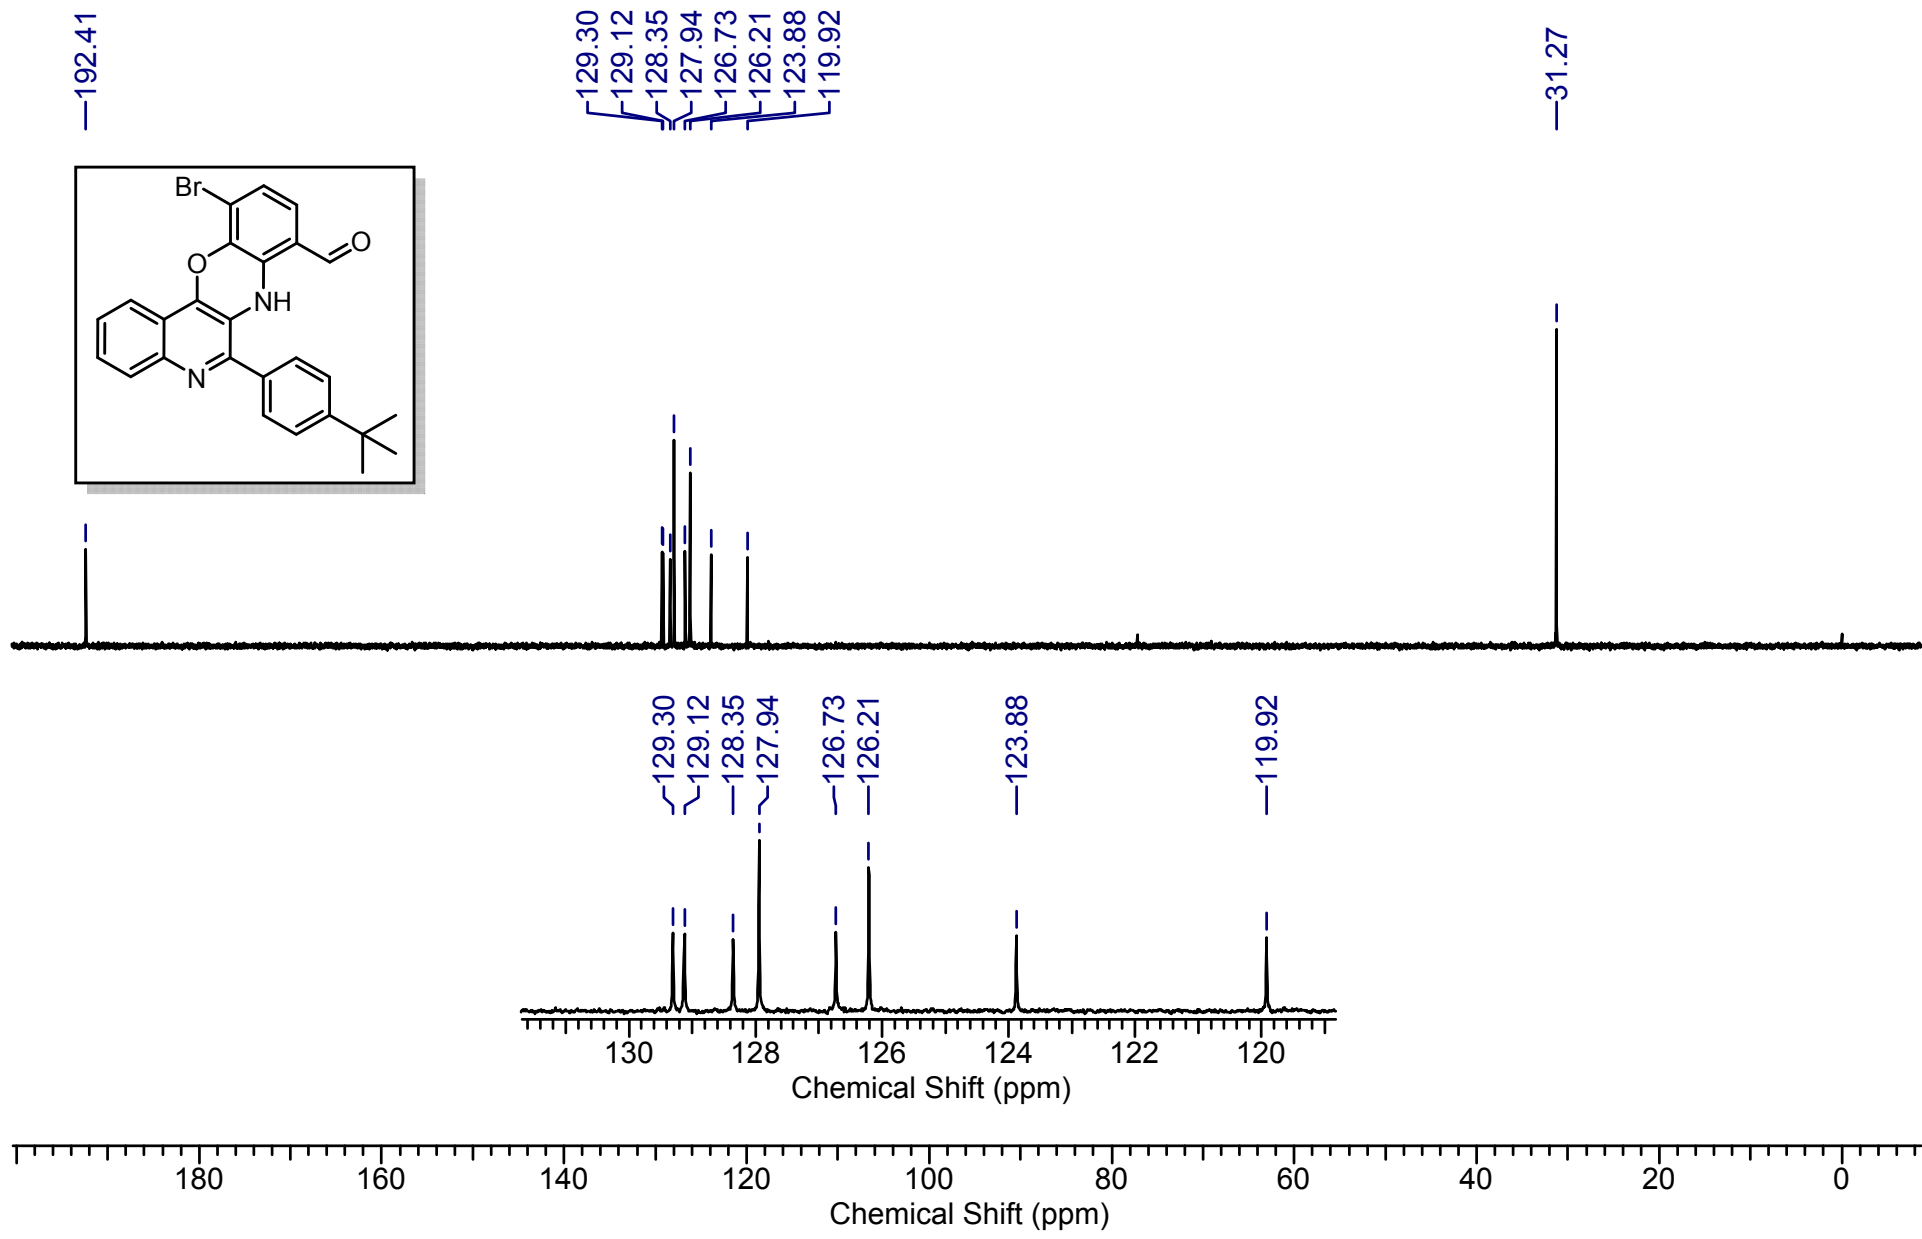

# 3gb

635 #1091 RT: 4.95 AV: 1 NL: 4.86E5  
T: FTMS + p ESI Full ms [100.0000-1500.0000]

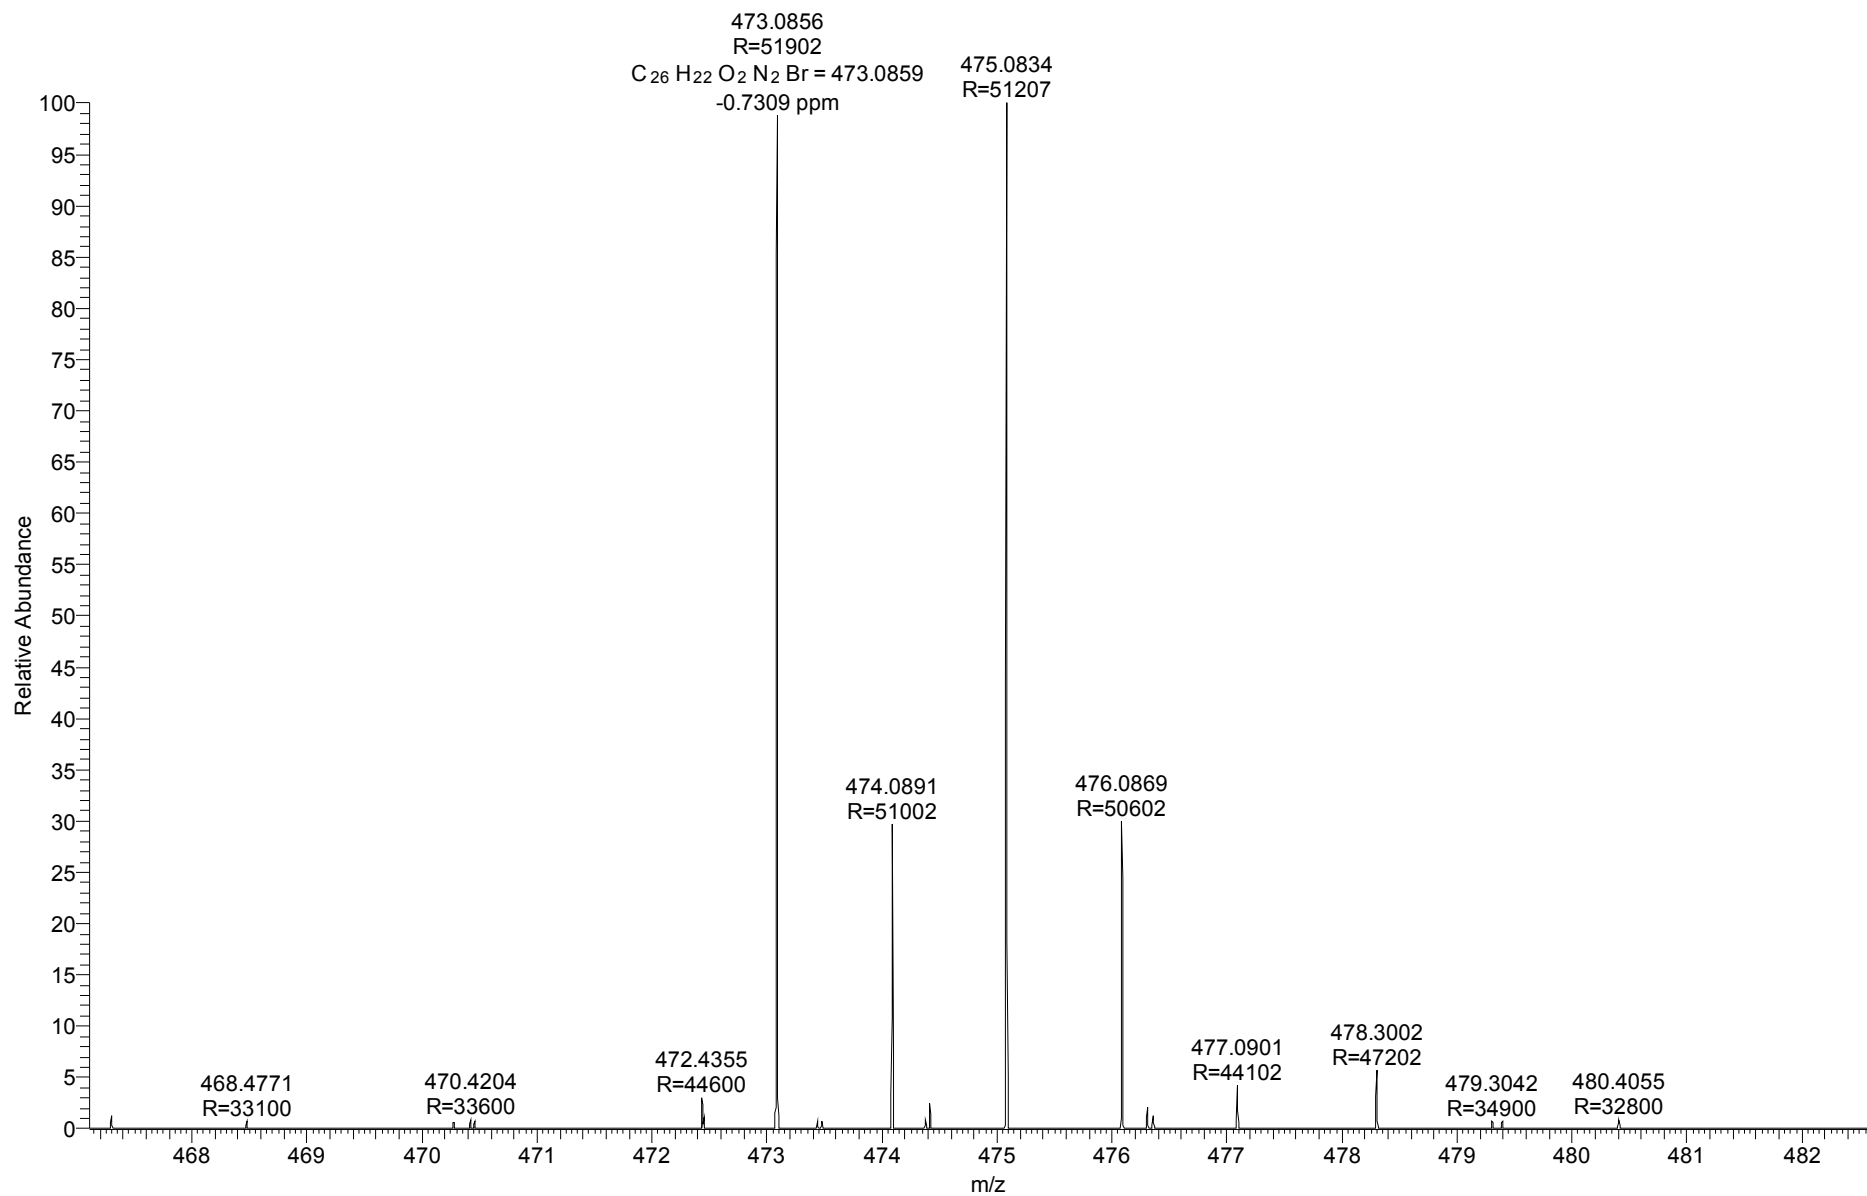

3gc

9.64  
9.59  
7.95  
7.93  
7.92  
7.91  
7.69  
7.67  
7.63  
7.63  
7.61  
7.27  
6.96  
6.94  
6.71  
6.69

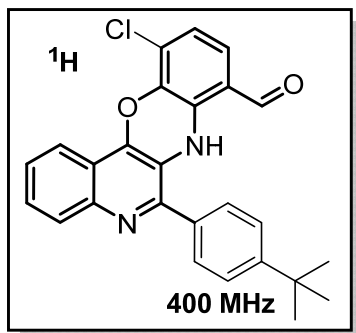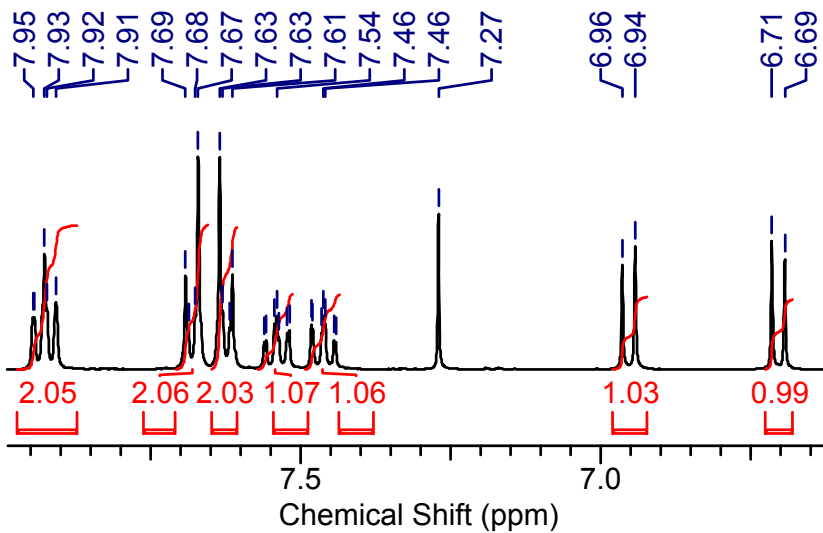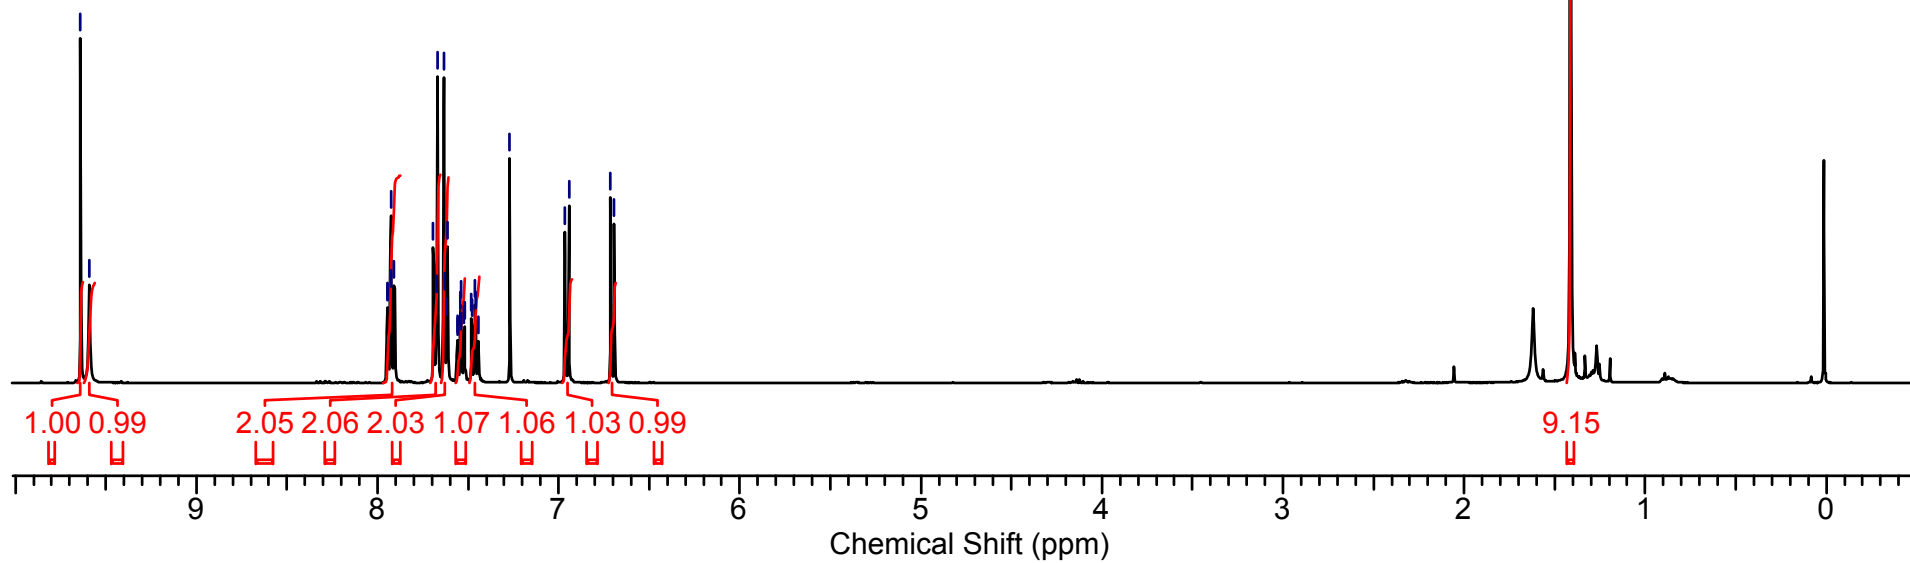

3gc

192.30

152.81  
148.10  
143.85  
136.98  
133.34  
129.15  
129.00  
128.34  
127.95  
126.71  
126.21  
126.14  
121.19  
119.83  
117.09

77.32  
77.00  
76.68

34.85  
31.27

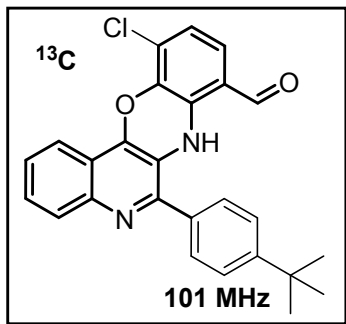

129.15  
129.00  
128.34  
127.95  
126.71  
126.21  
126.14  
121.19  
119.83  
119.37  
118.02  
117.09

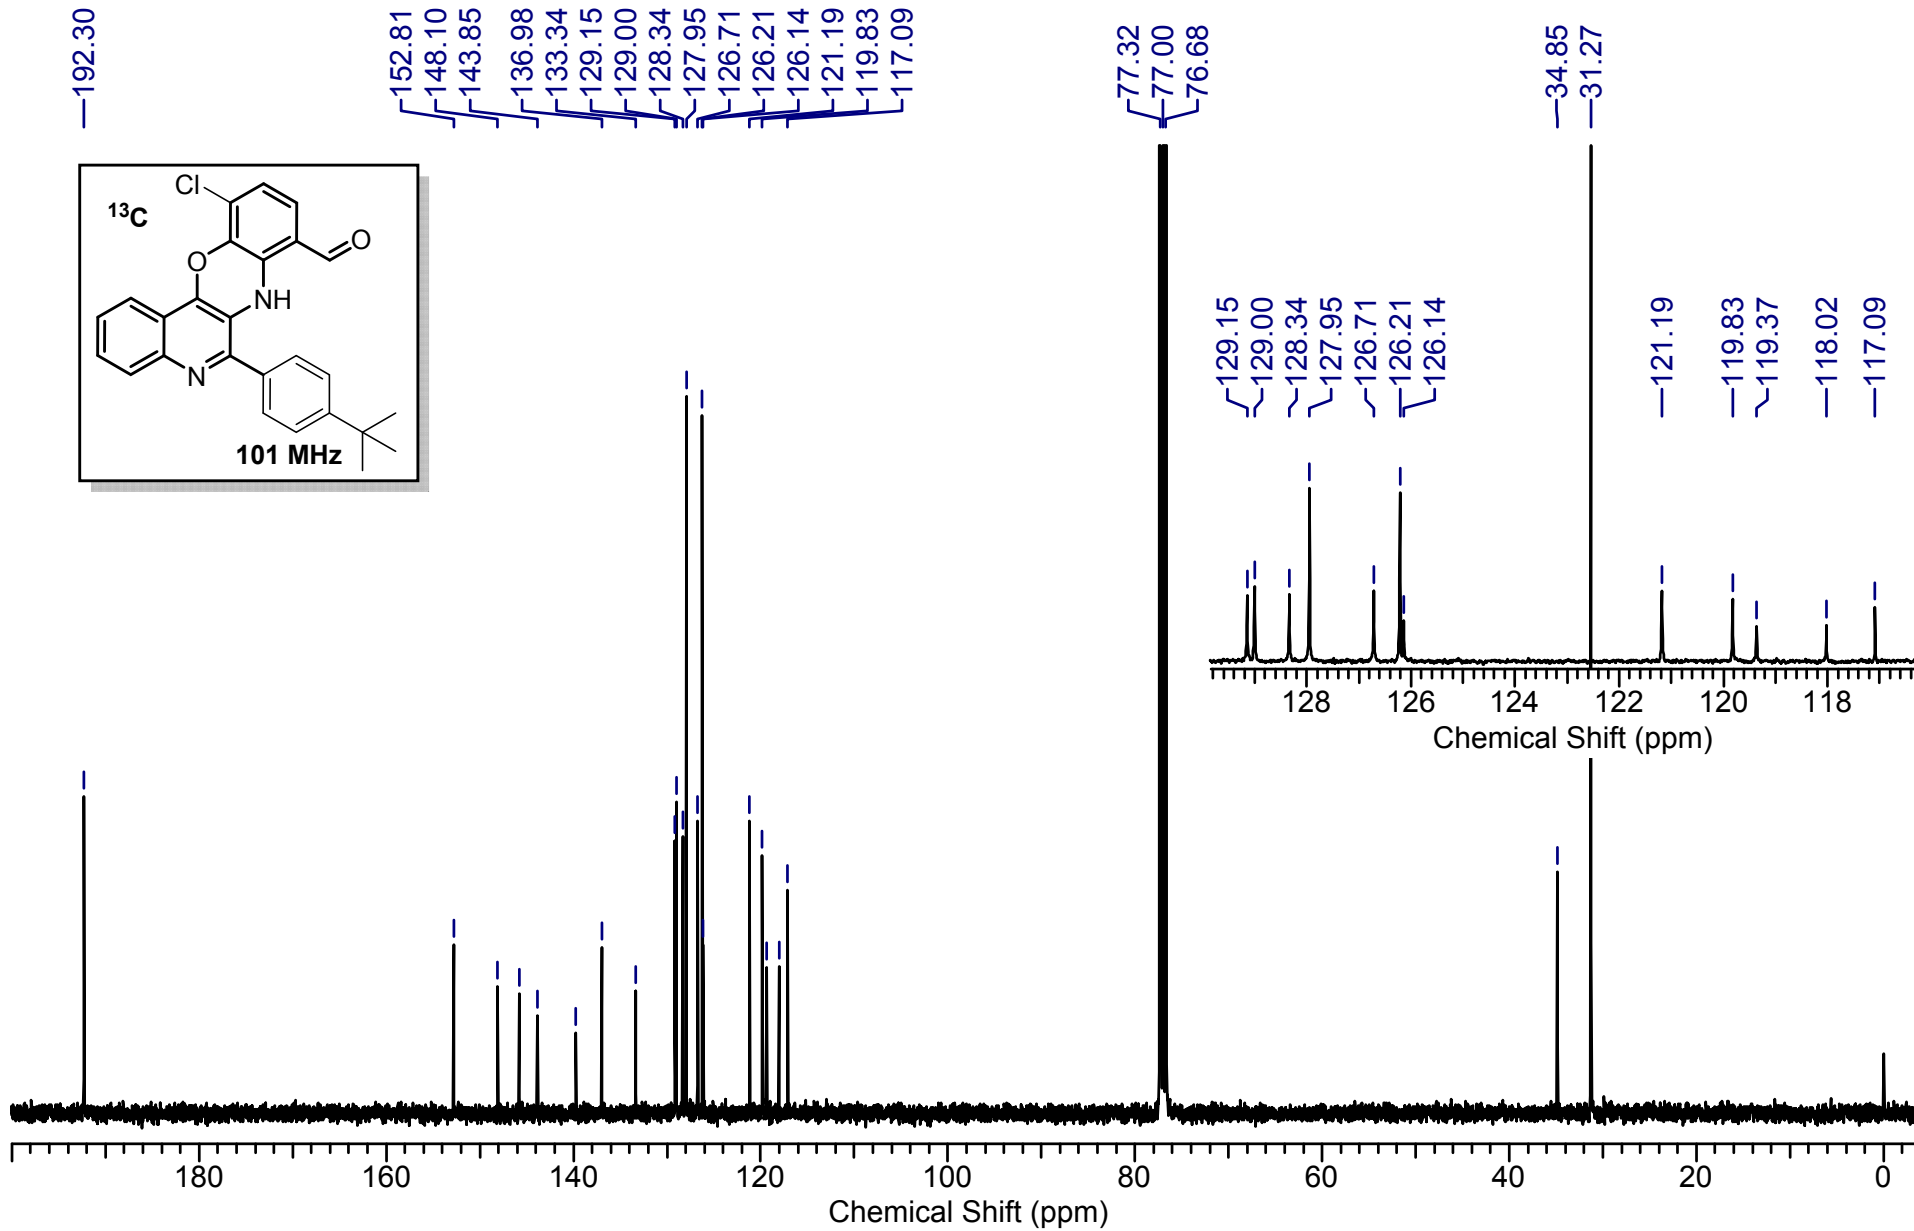

3gc

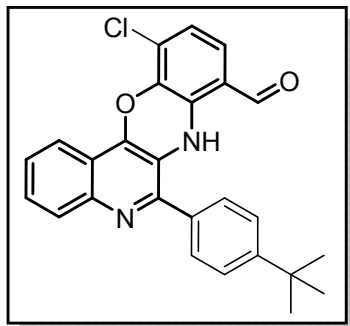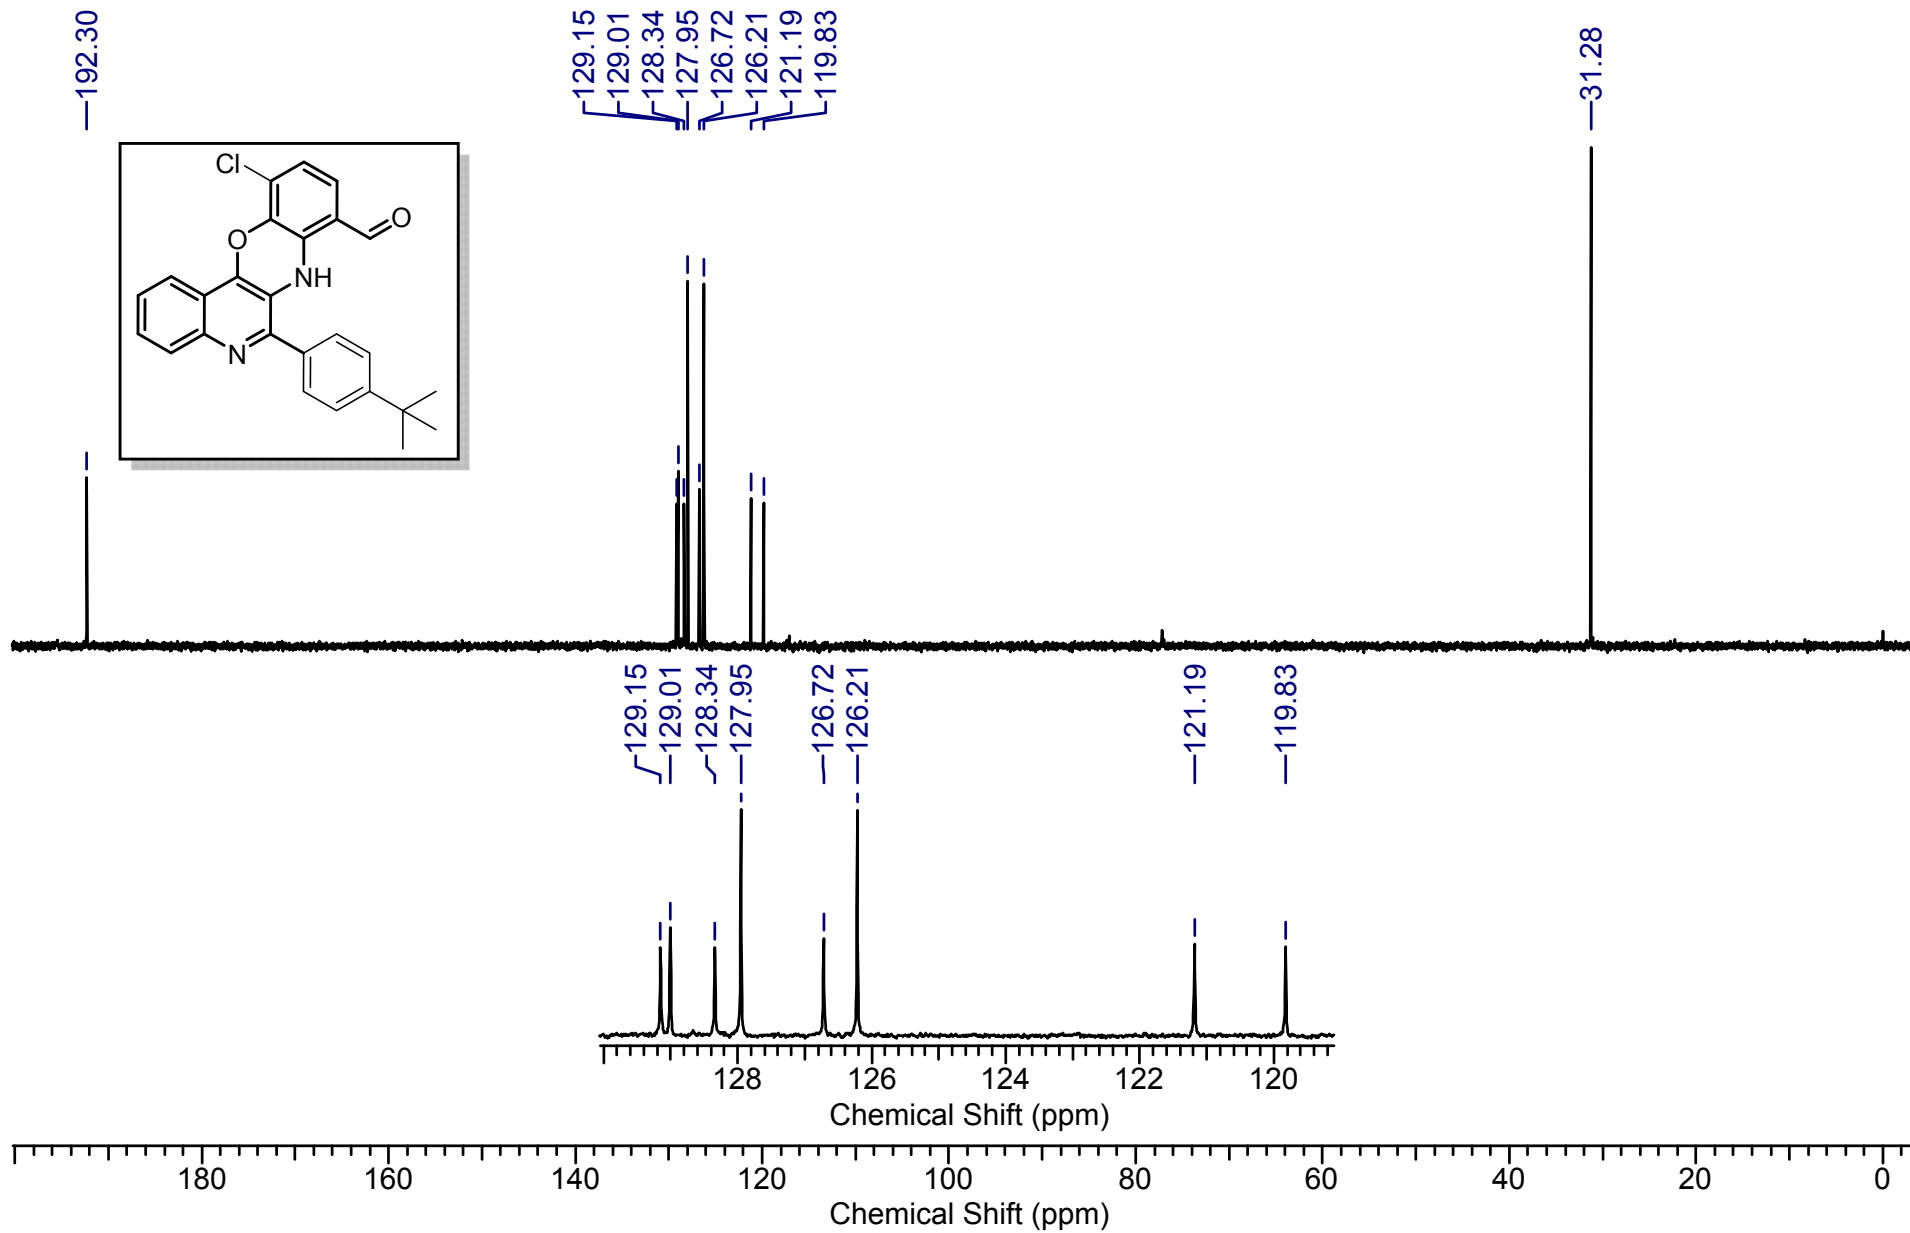

# 3gc

SH-636 #660 RT: 3.55 AV: 1 NL: 2.06E7  
T: FTMS + p ESI Full ms [100.0000-1500.0000]

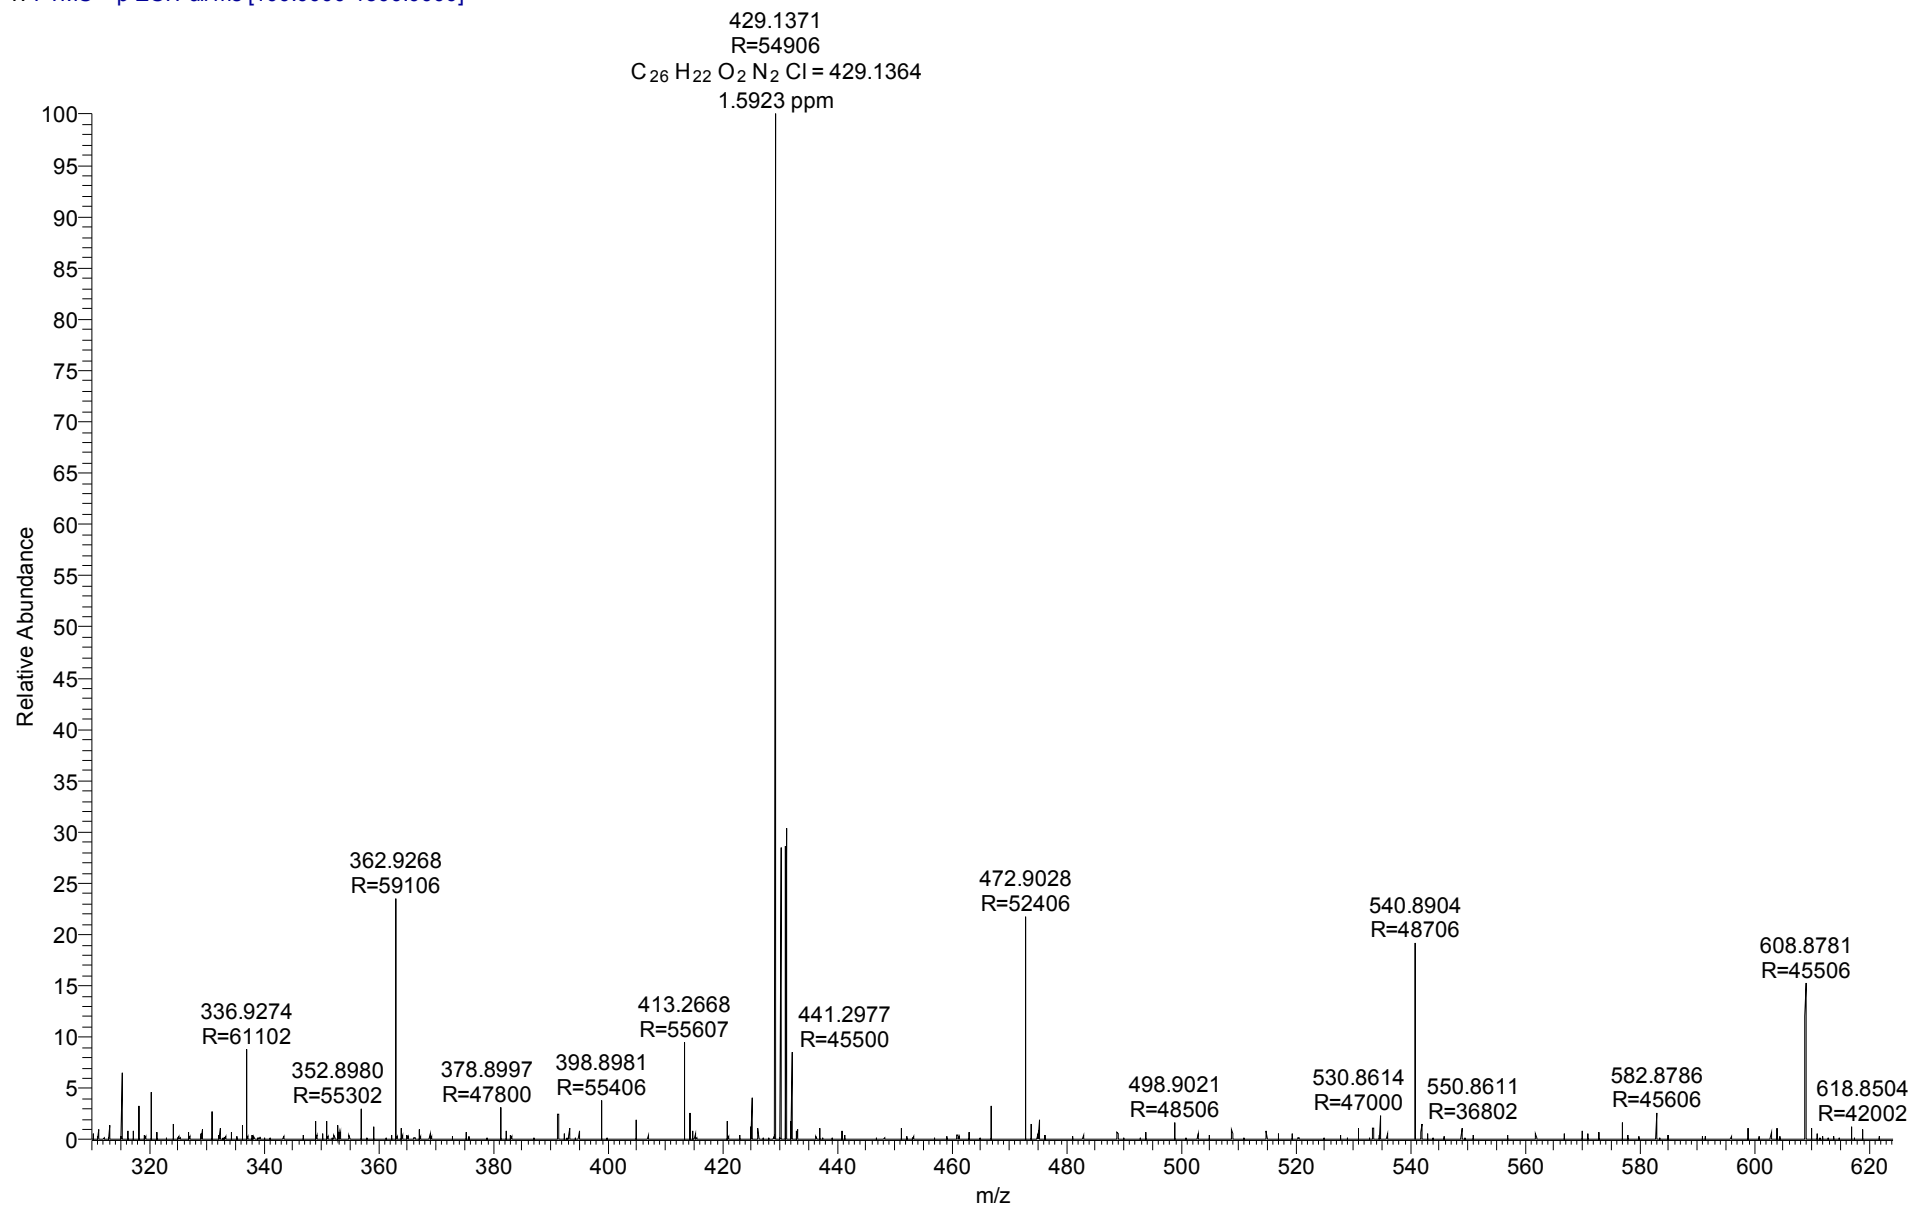

# 3gd

10.19  
10.13

7.92  
7.90  
7.82  
7.68  
7.66  
7.64  
7.61  
7.52  
7.43  
7.27  
6.74  
6.72  
6.59  
6.57

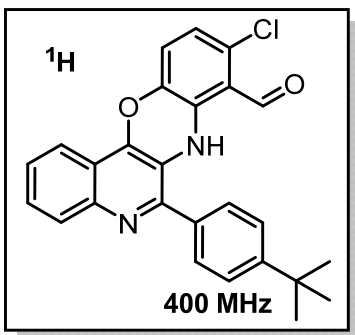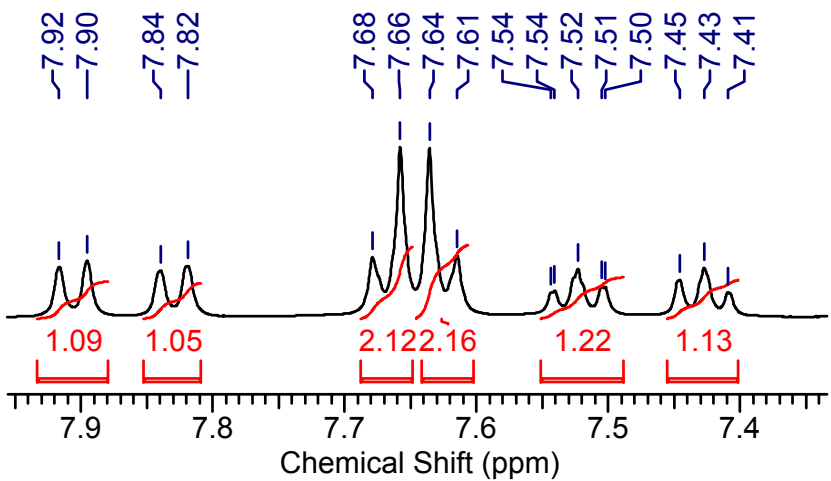

1.41

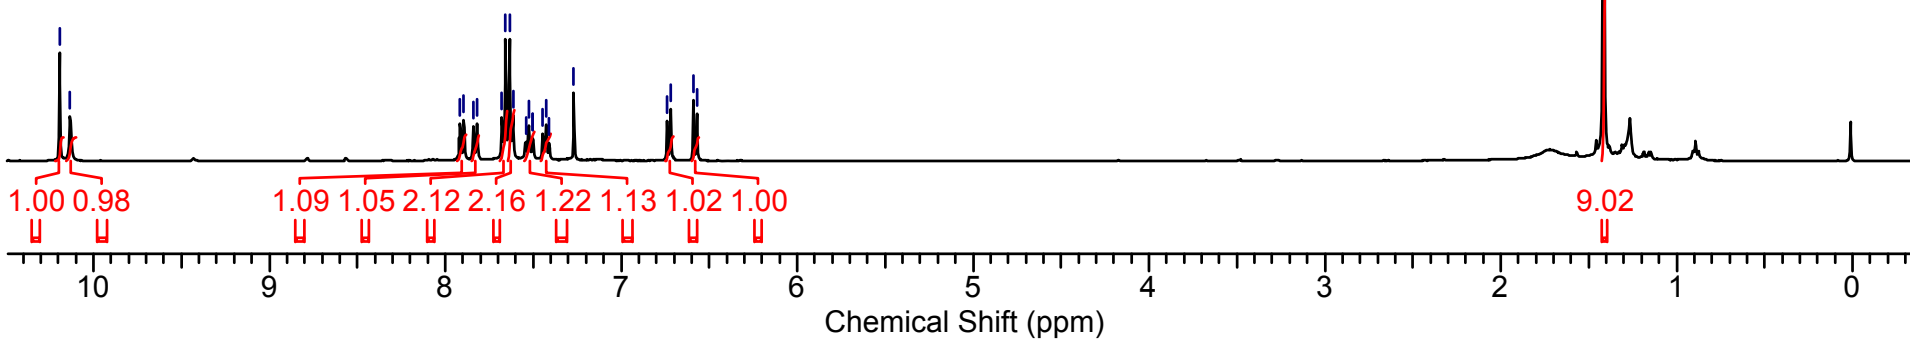

3gd

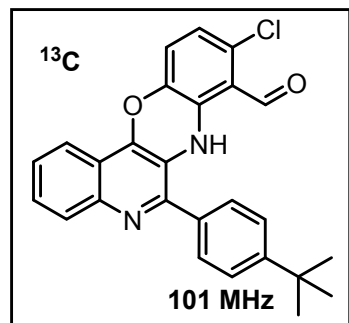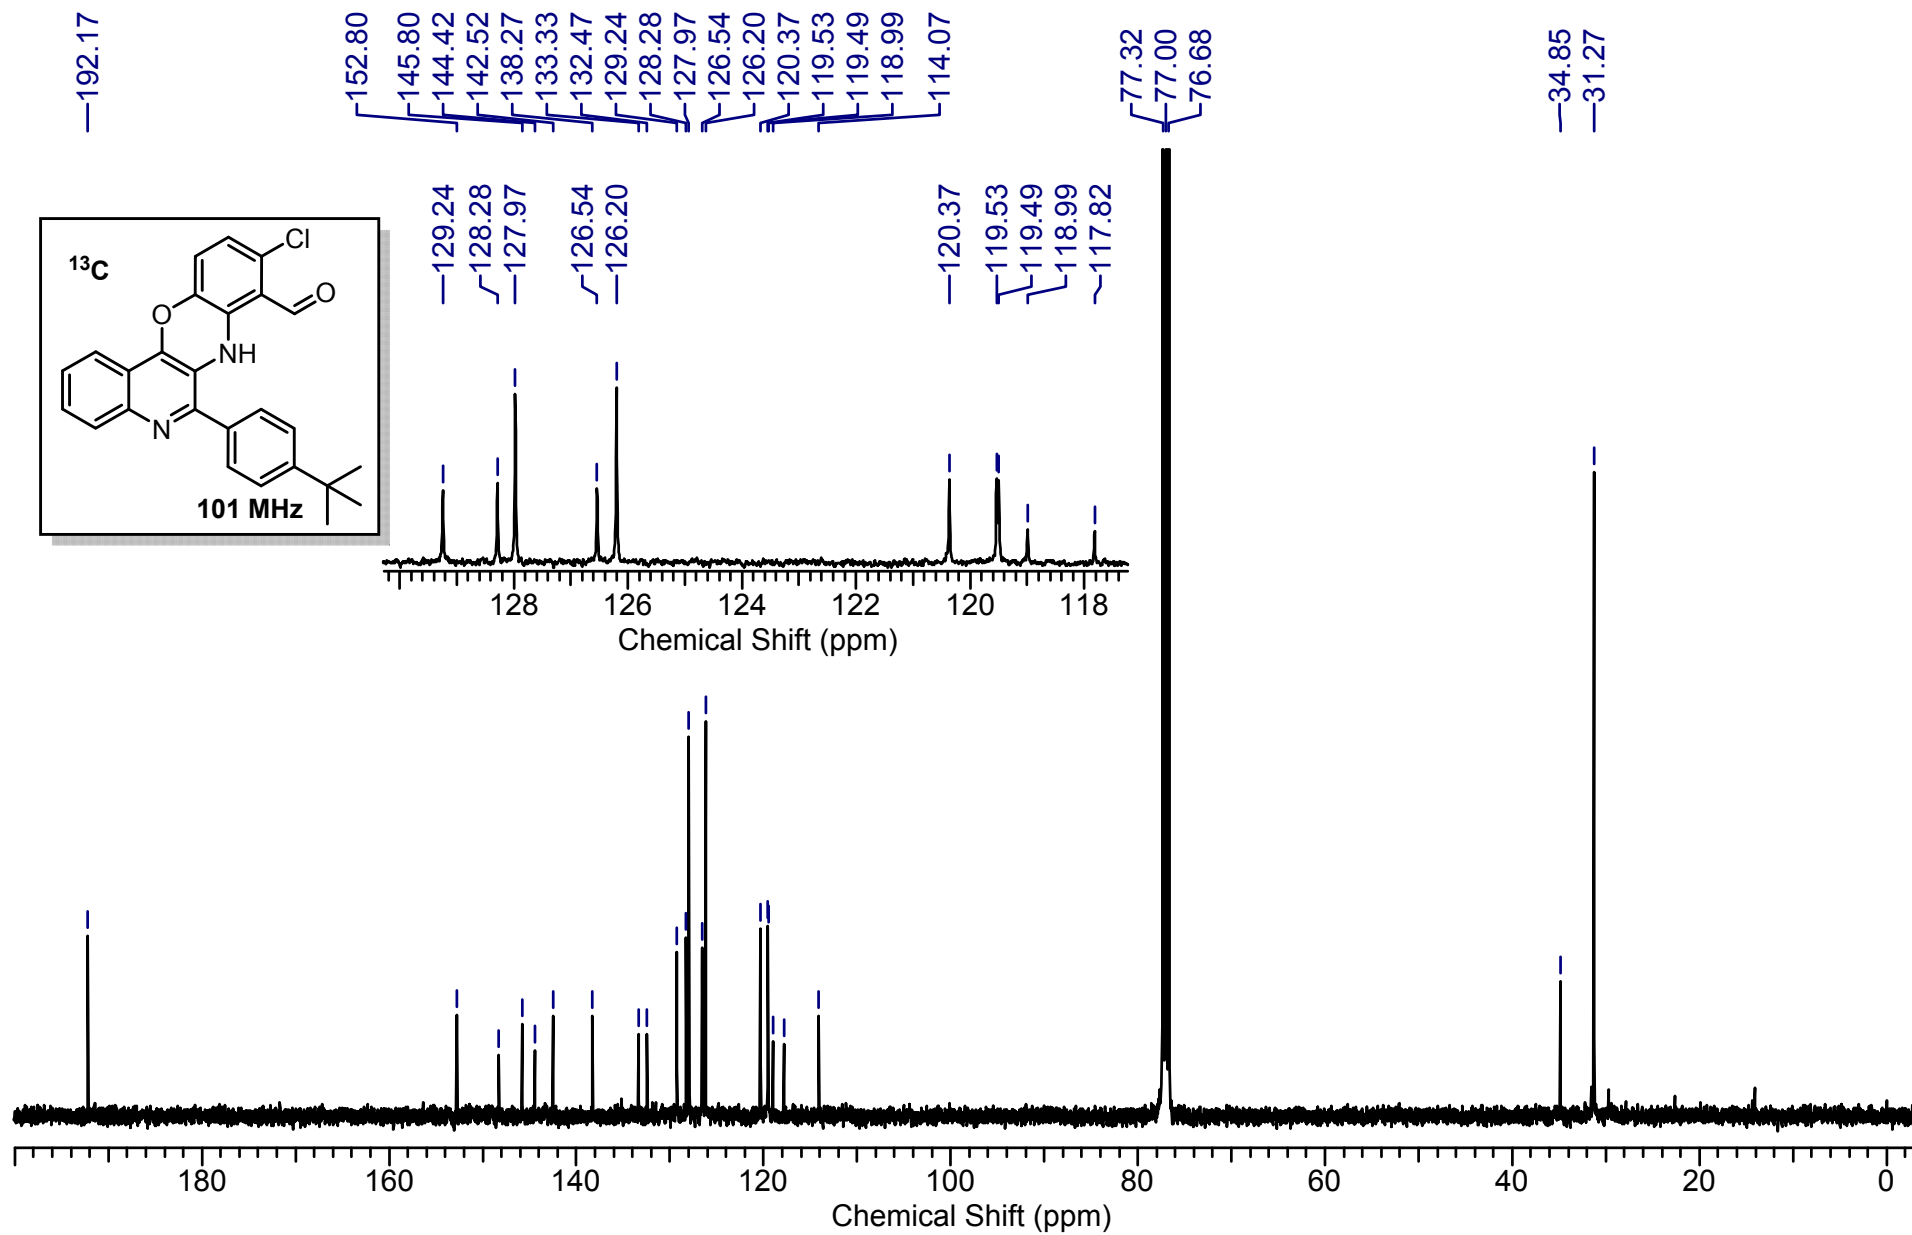



3gd

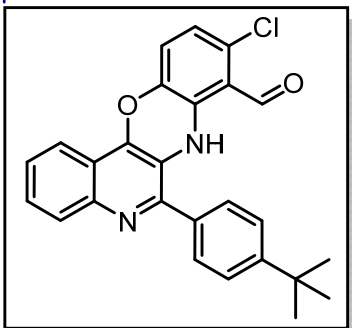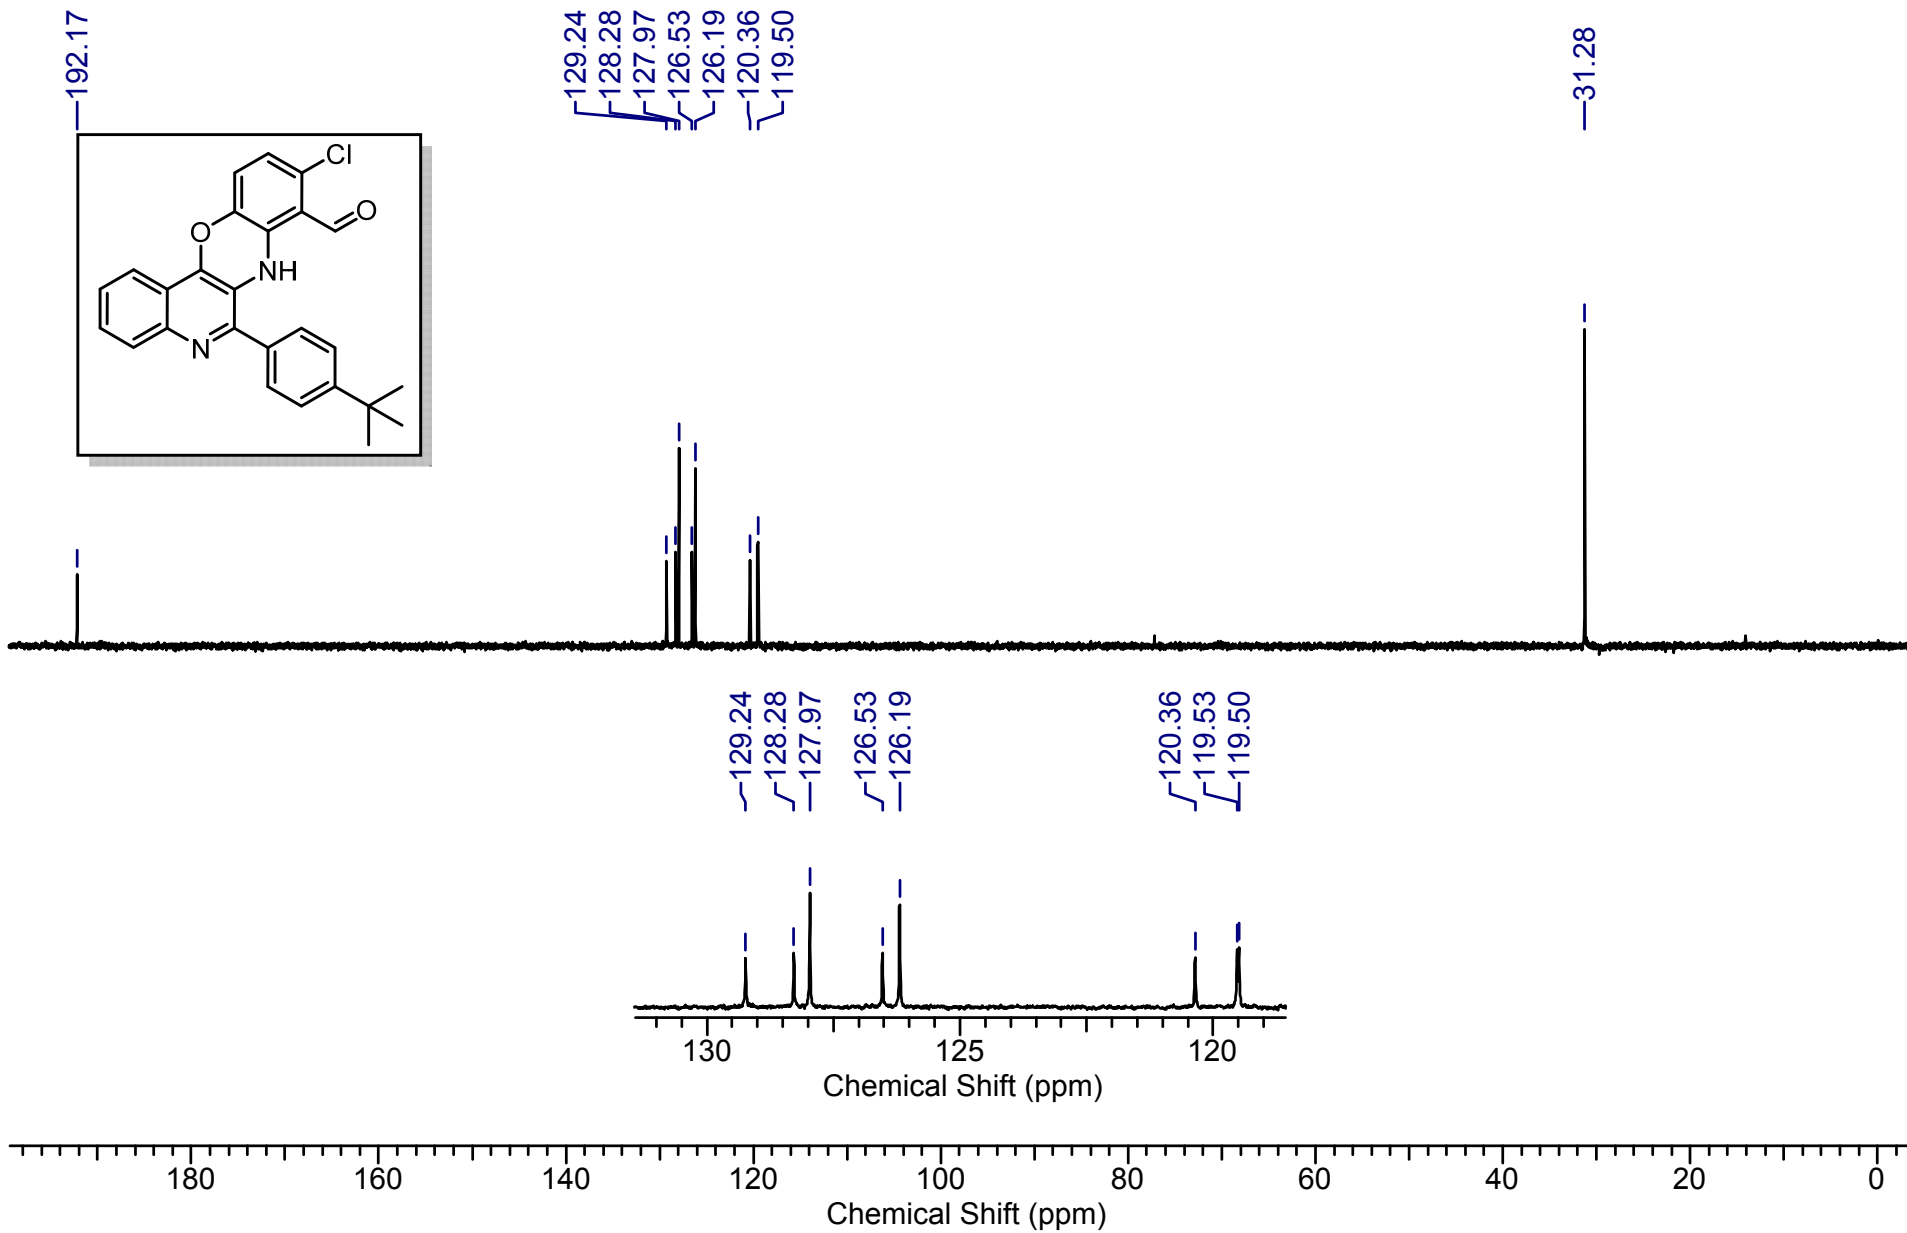

# 3gd

SH-639 #698 RT: 3.75 AV: 1 NL: 4.80E7  
T: FTMS + p ESI Full ms [100.0000-1500.0000]

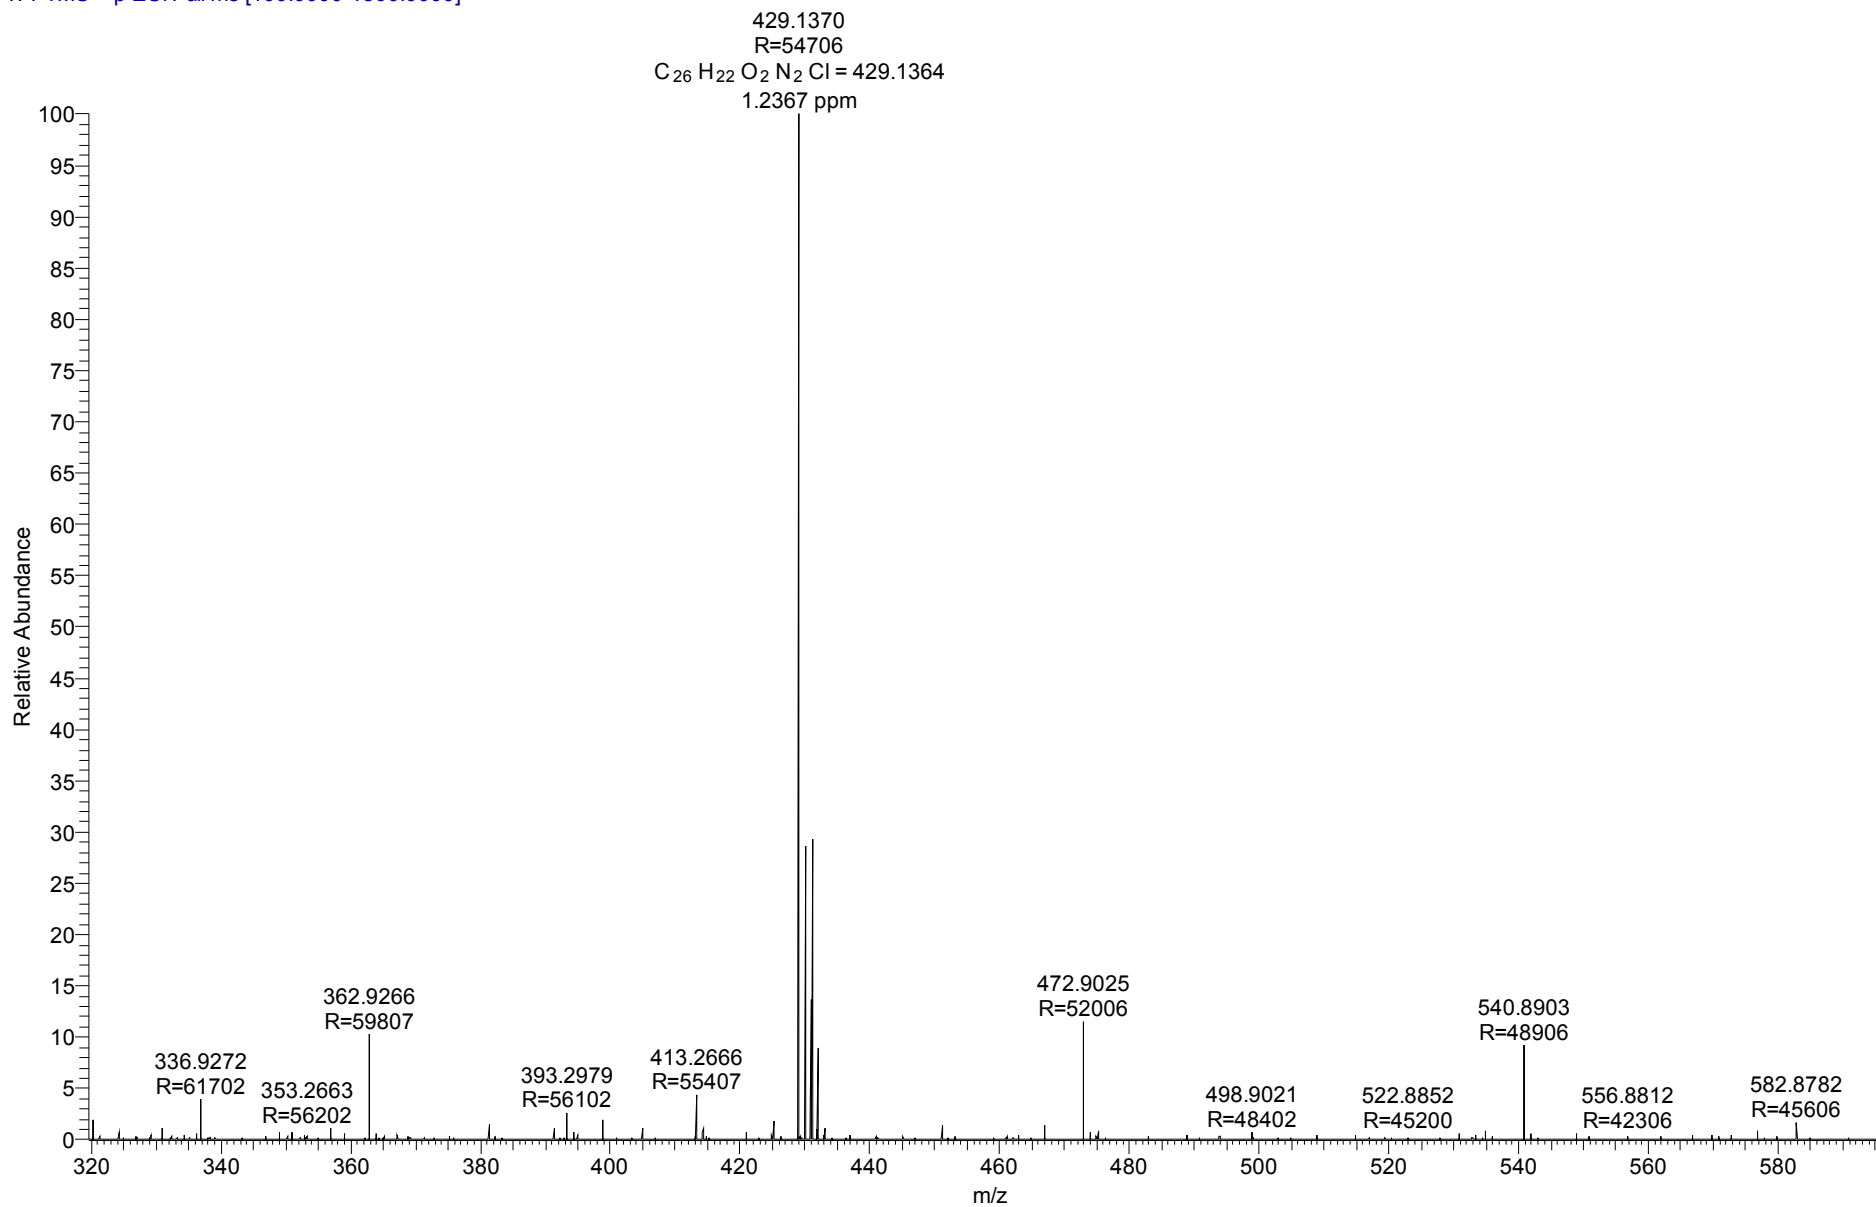

# 3ia

9.69  
9.40  
7.81  
7.79  
7.68  
7.66  
7.53  
7.52  
7.27  
7.13  
7.10  
7.05  
7.03  
6.82  
6.68  
3.91

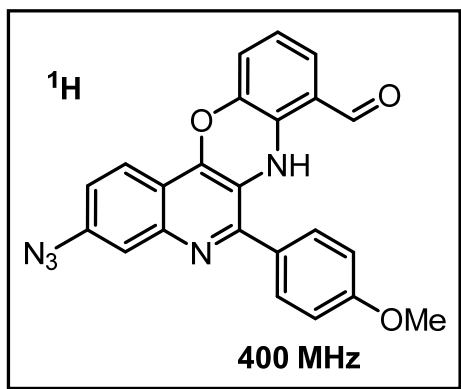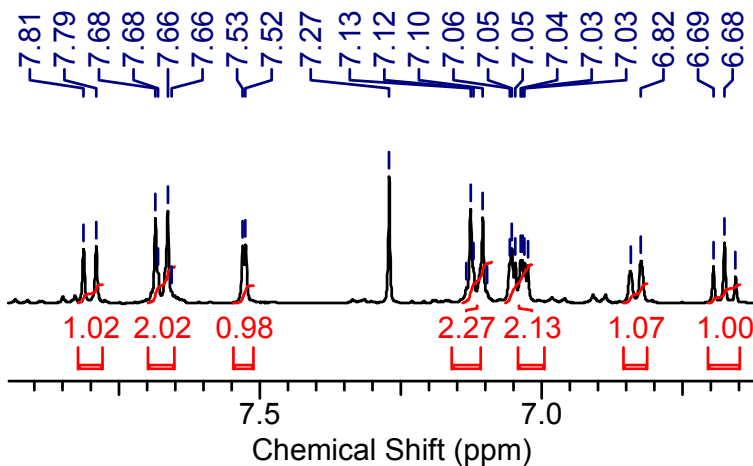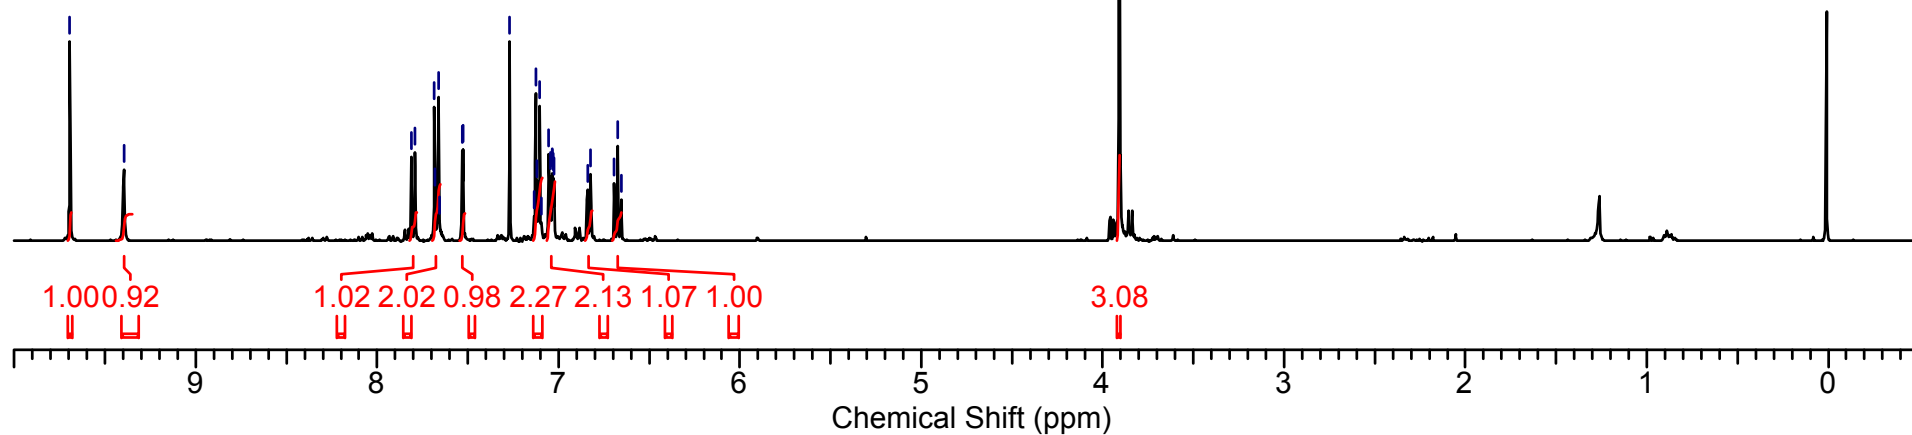

# 3ia

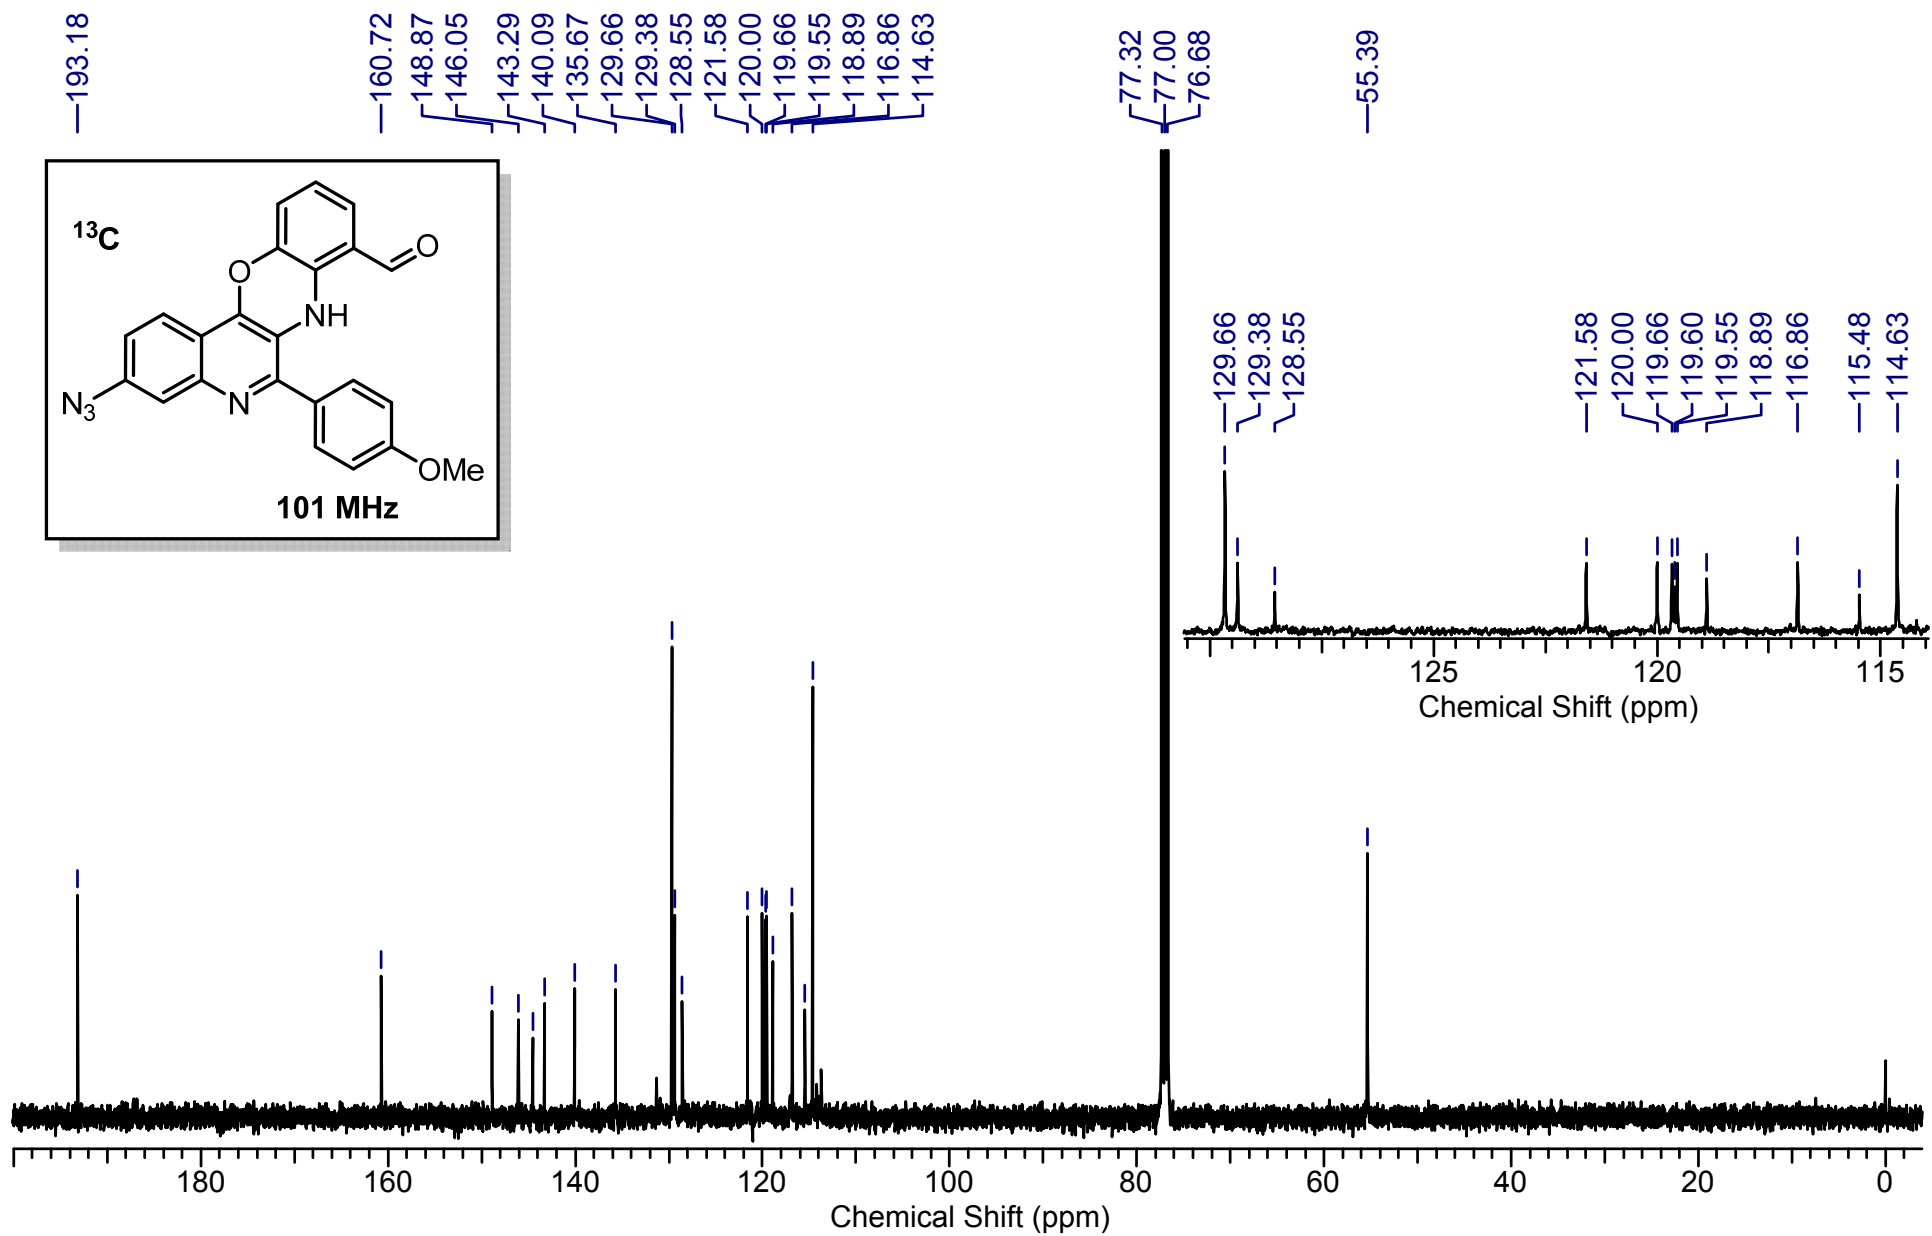

3ia

—193.18

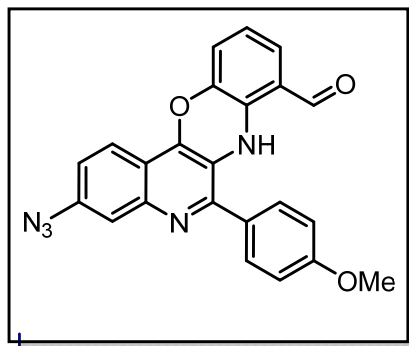

129.66  
129.38  
121.58  
120.00  
119.66  
119.54  
116.85  
114.63

—55.39

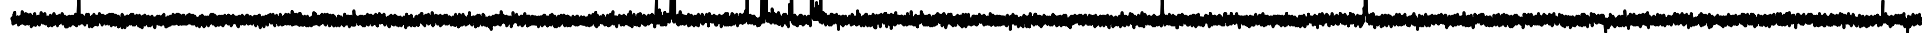

129.66  
129.38

121.58  
120.00  
119.66  
119.54

—116.85

—114.63

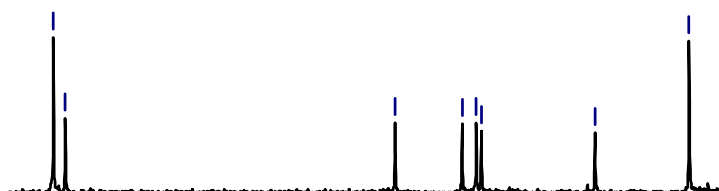

130  
125  
120  
115

Chemical Shift (ppm)

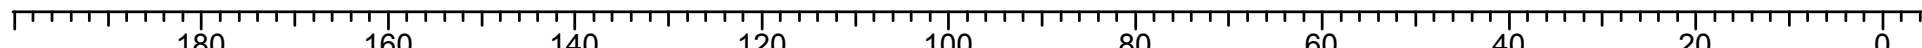

Chemical Shift (ppm)

# 3ia

SVH-764 #726 RT: 3.23 AV: 1 NL: 3.12E8  
T: FTMS + p ESI Full ms [100.0000-1500.0000]

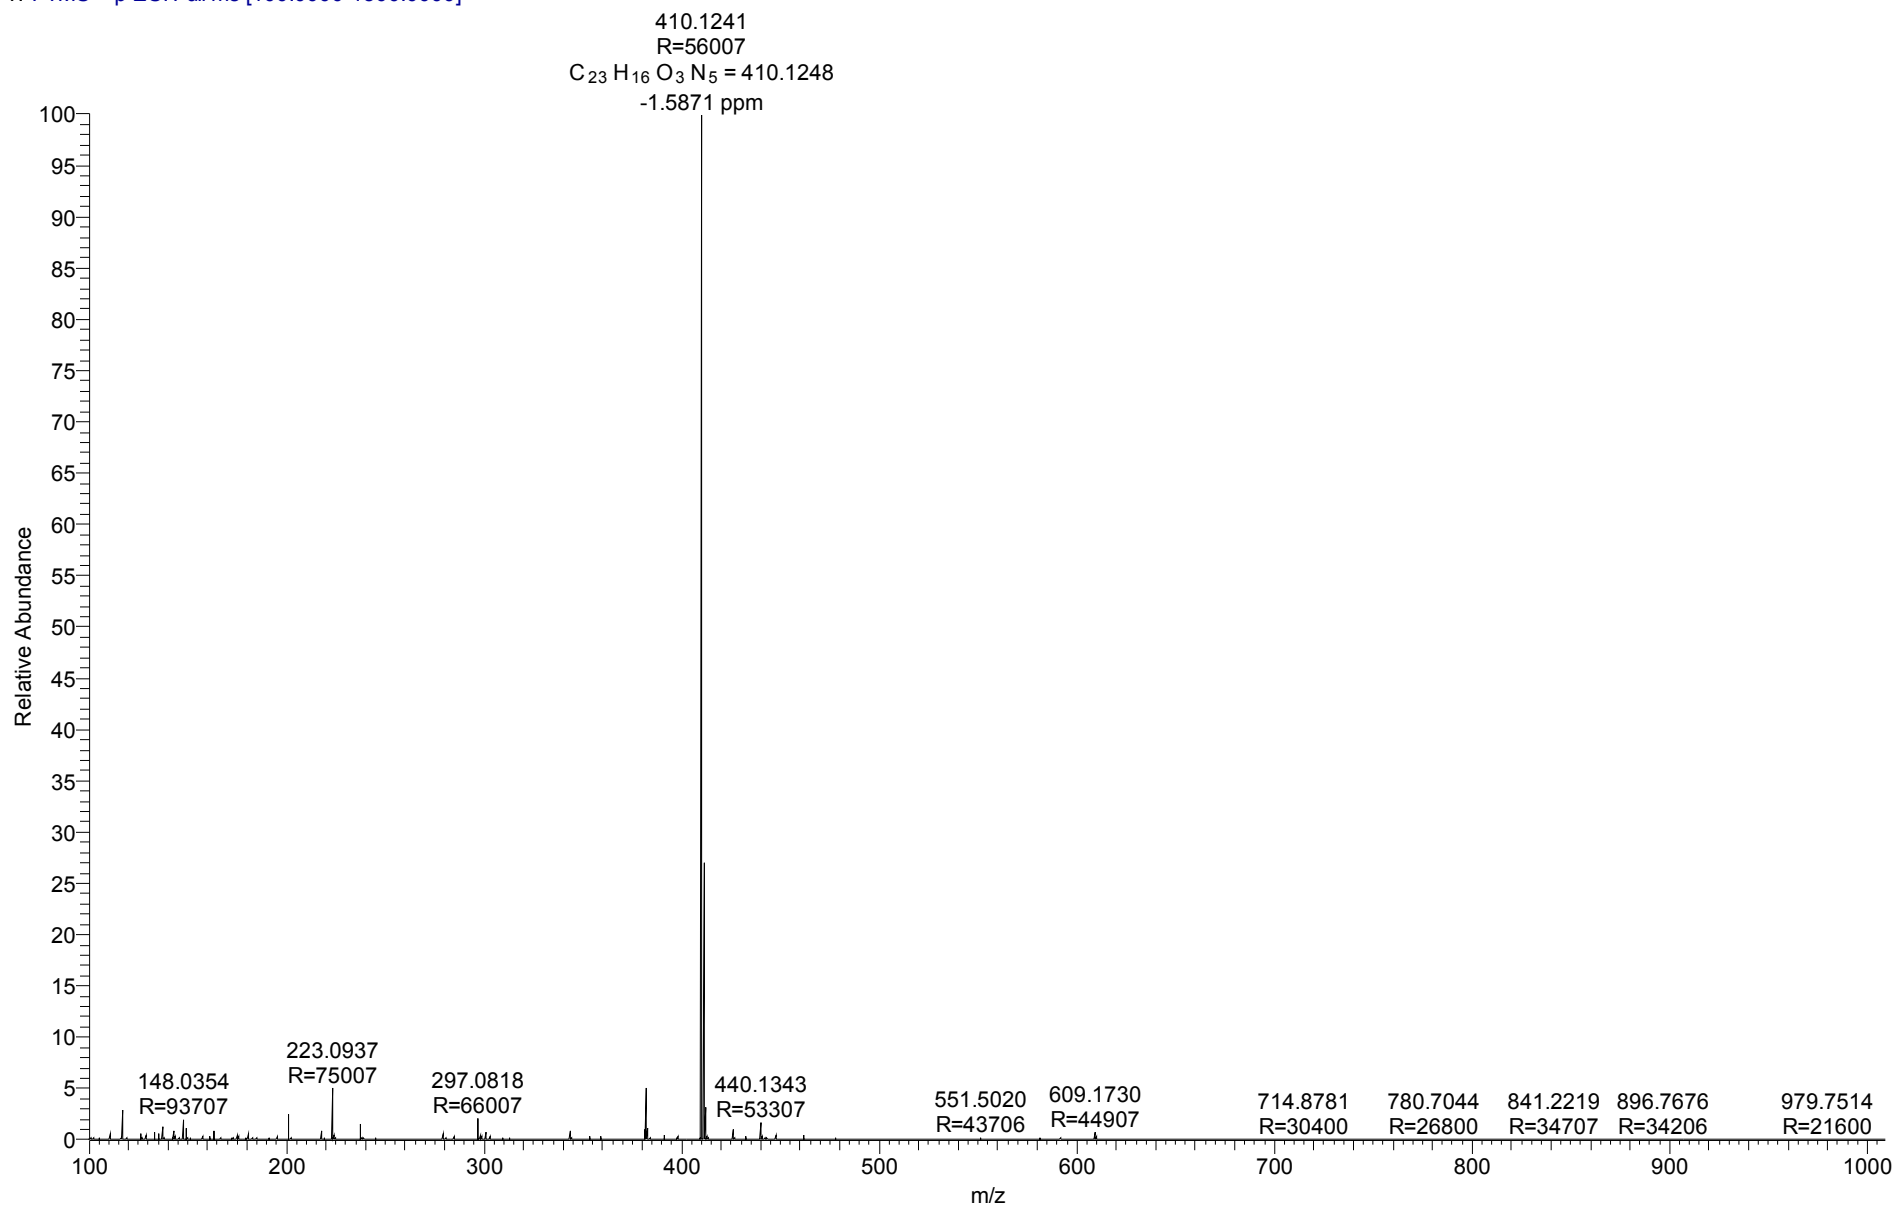

# 3ja

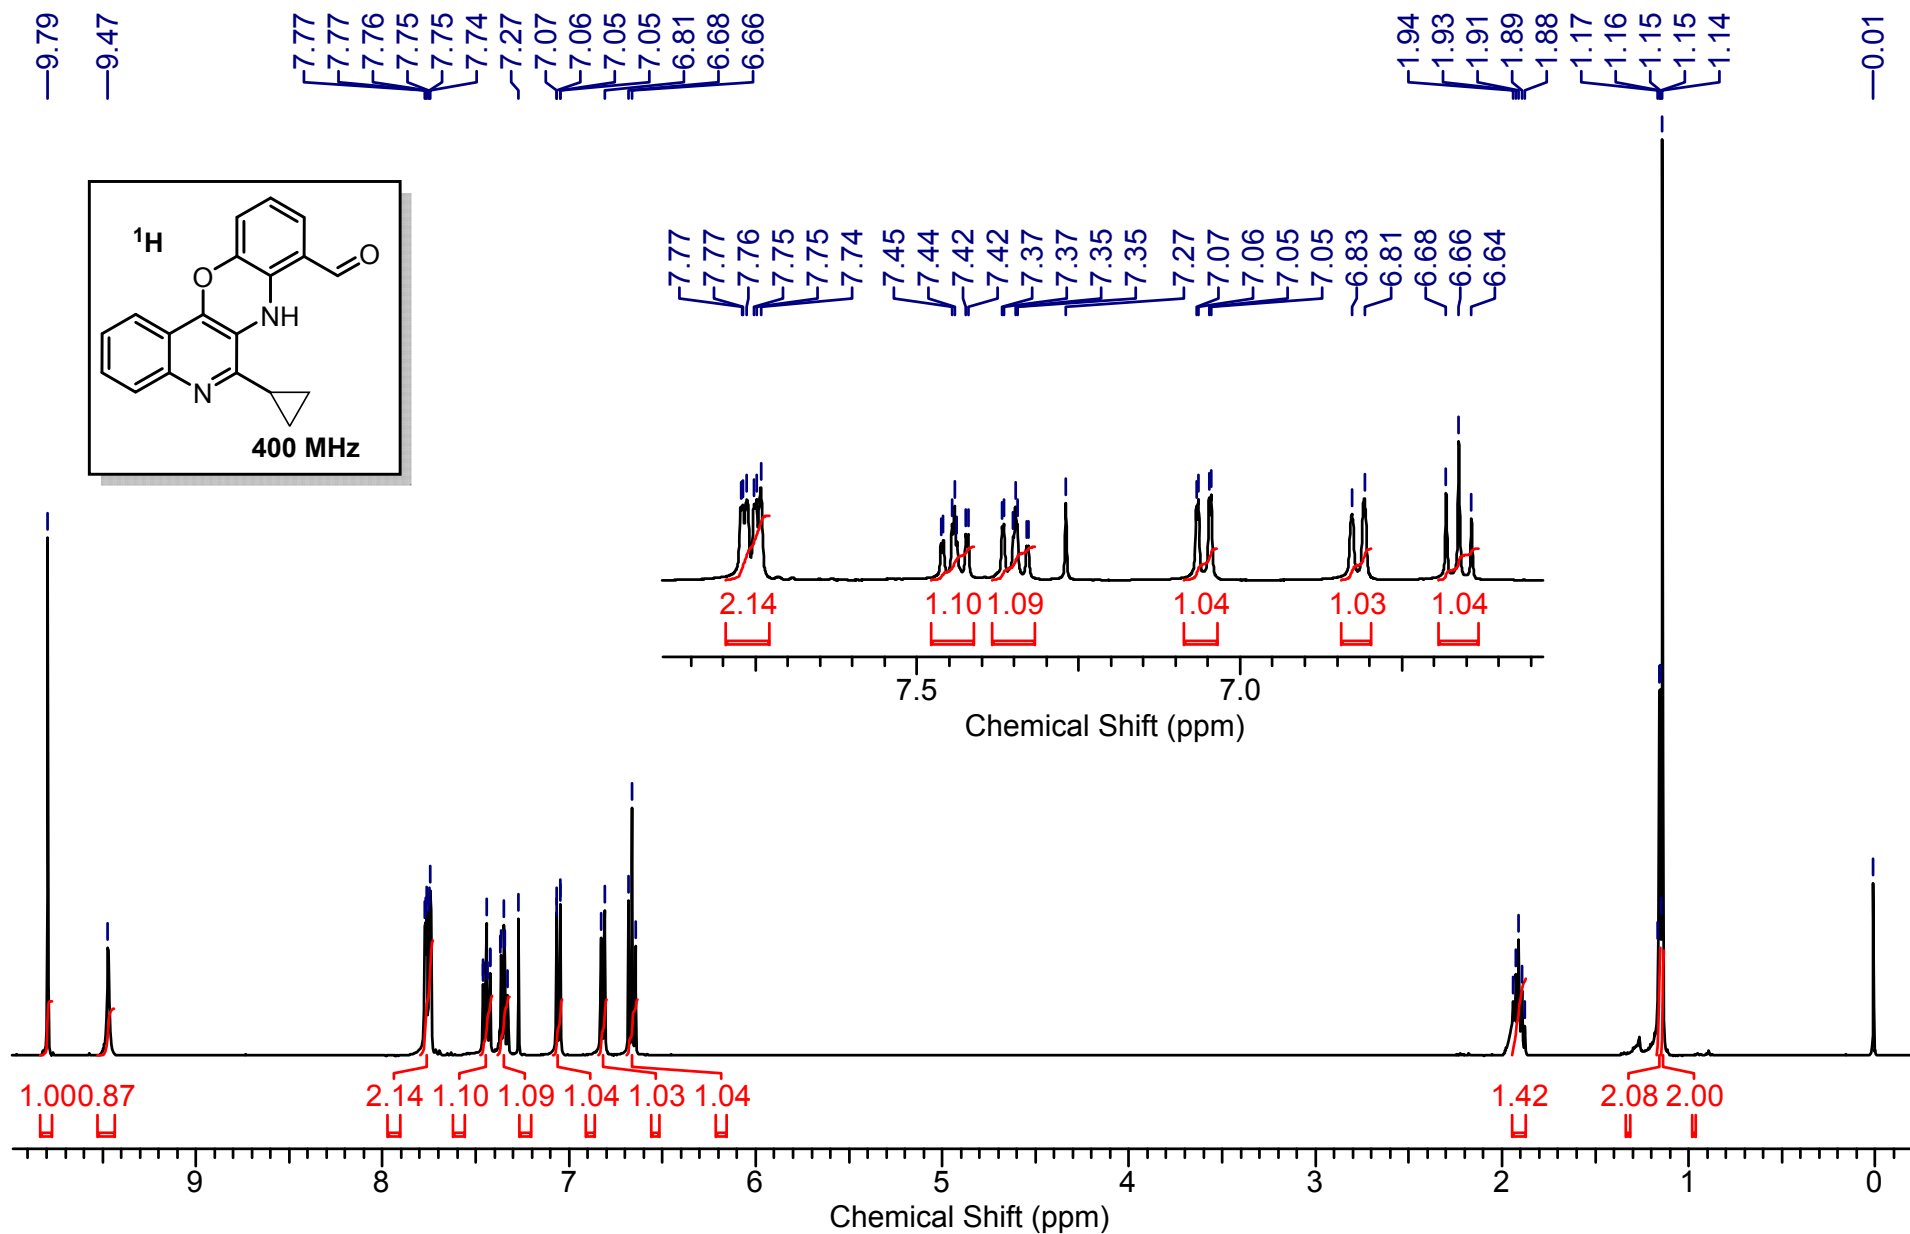

# 3ja

193.63

149.75  
145.03  
143.70  
136.33  
129.14  
128.53  
127.52  
125.67  
120.80  
119.92  
119.64  
119.44  
118.83

77.32  
77.00  
76.68

12.48  
7.05

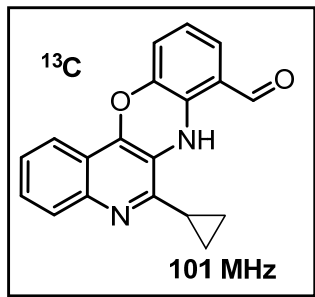

129.14  
128.53  
127.52  
125.67  
120.80  
119.92  
119.64  
119.44  
118.83  
117.74

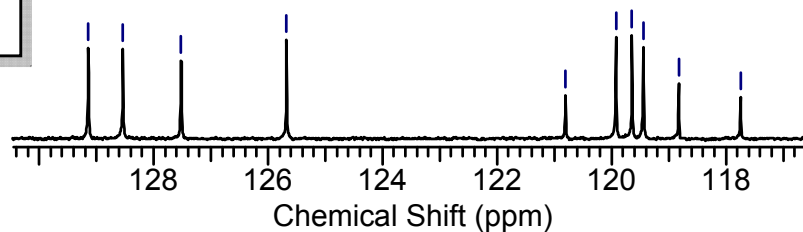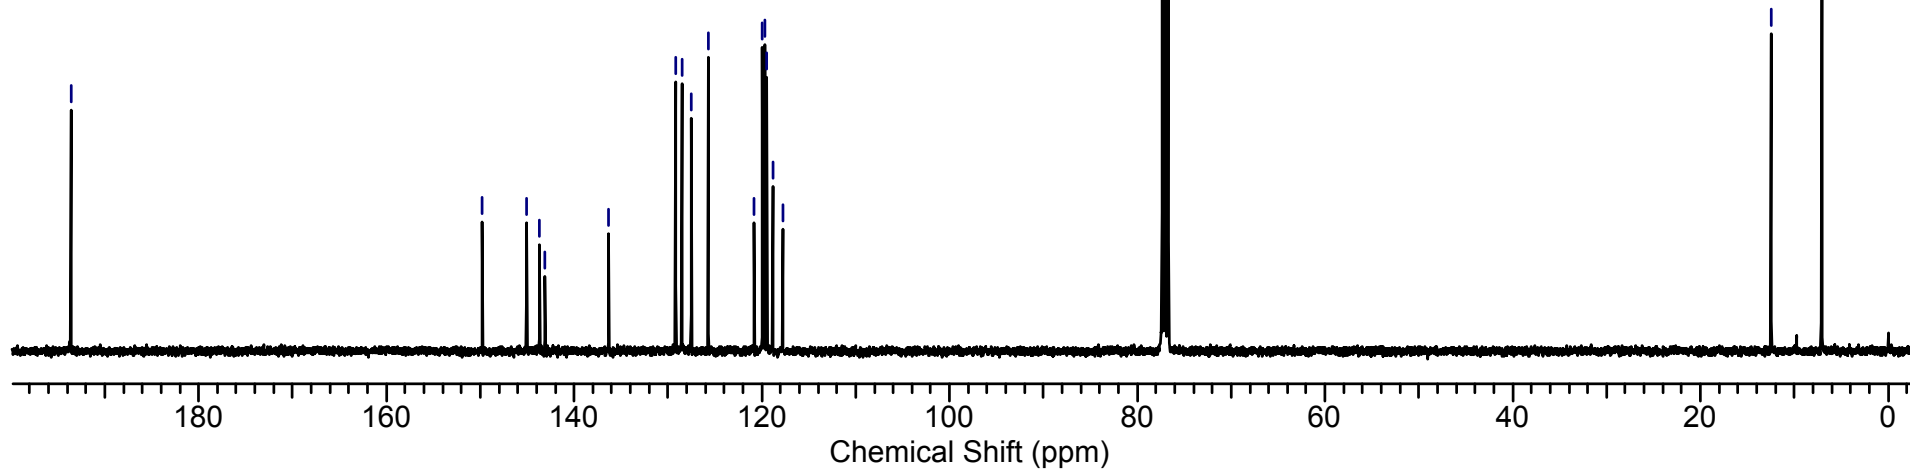



3ja

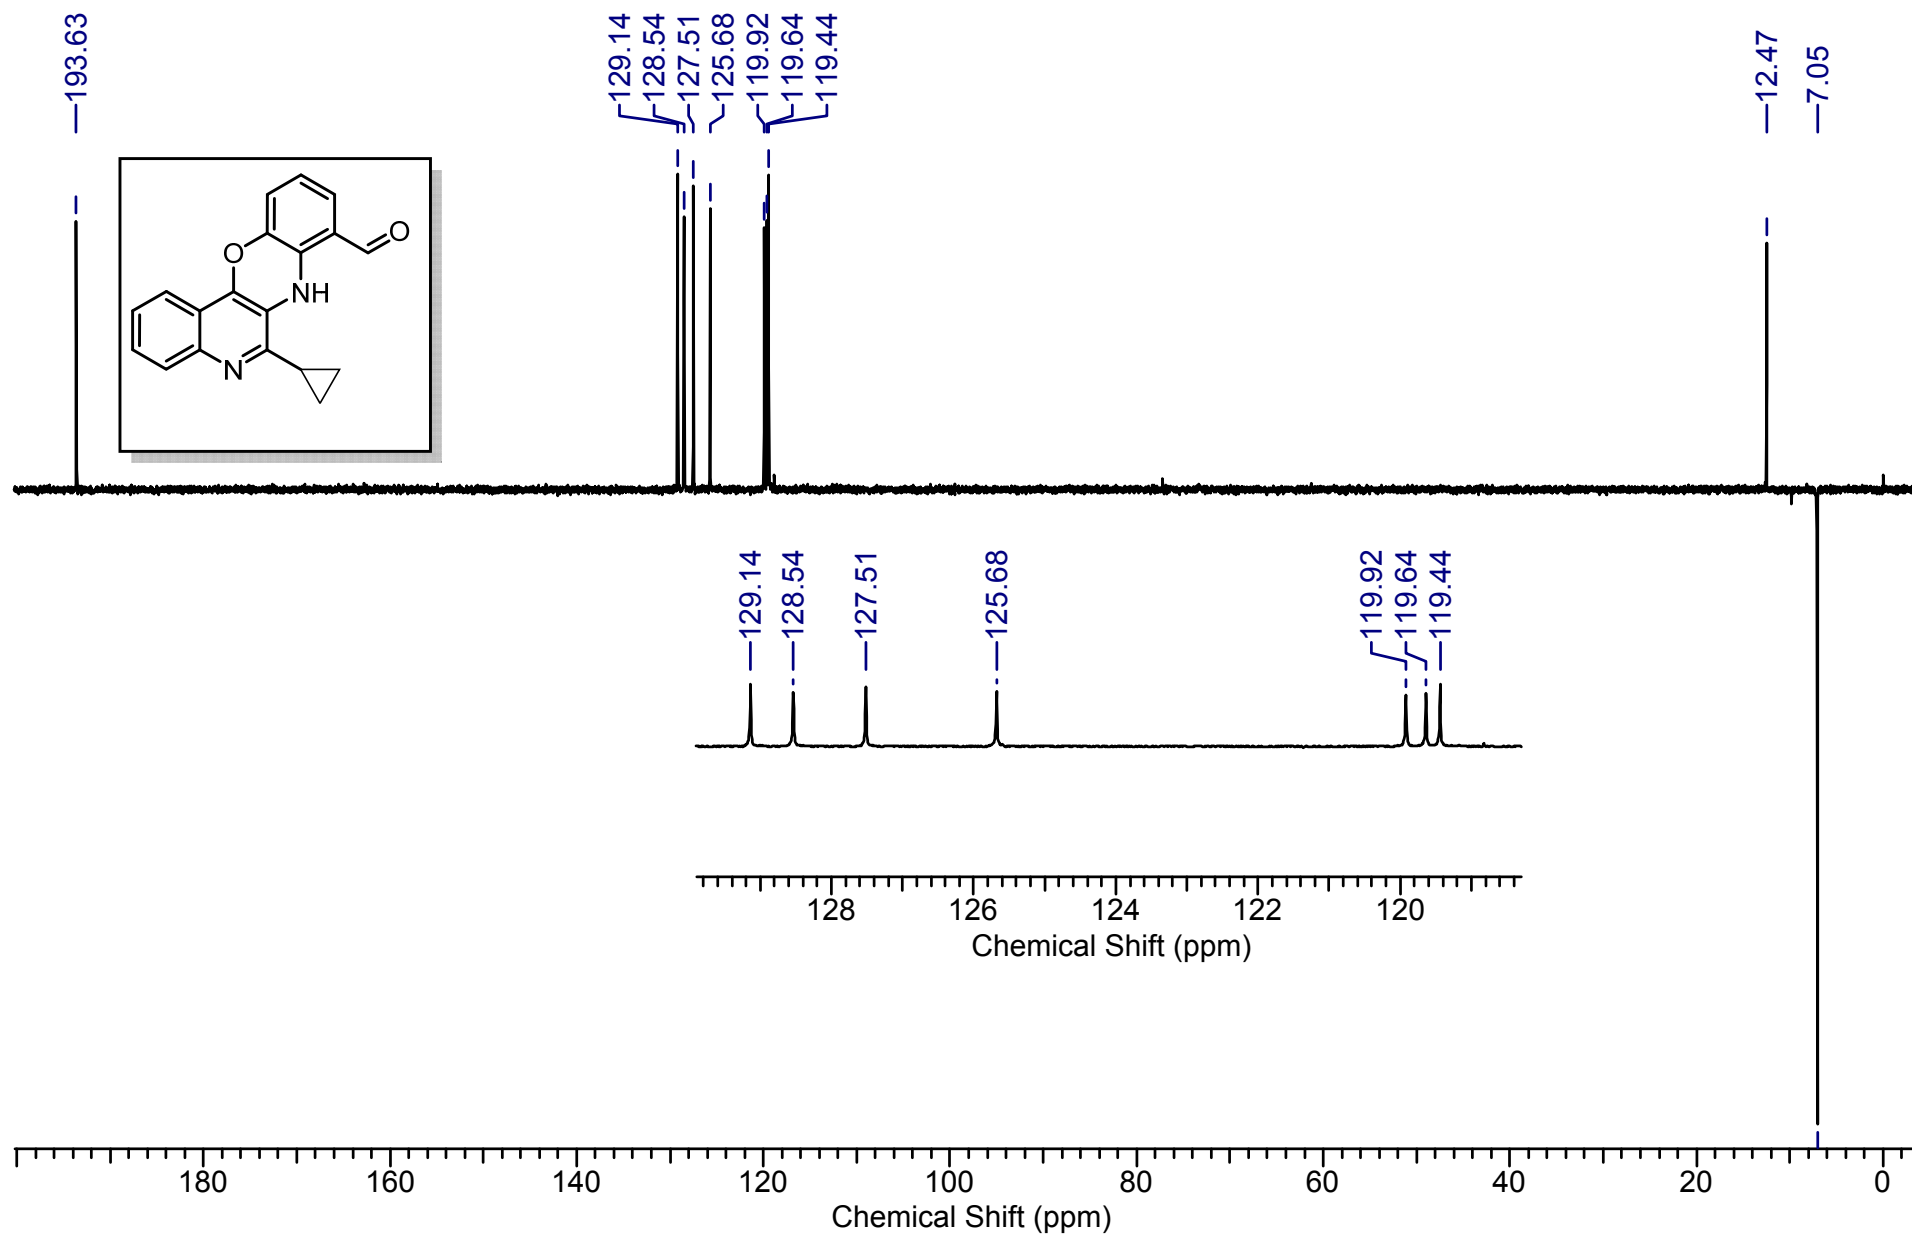

# 3ja

SH-660 #364 RT: 1.96 AV: 1 NL: 4.30E8  
T: FTMS + p ESI Full ms [100.0000-1500.0000]

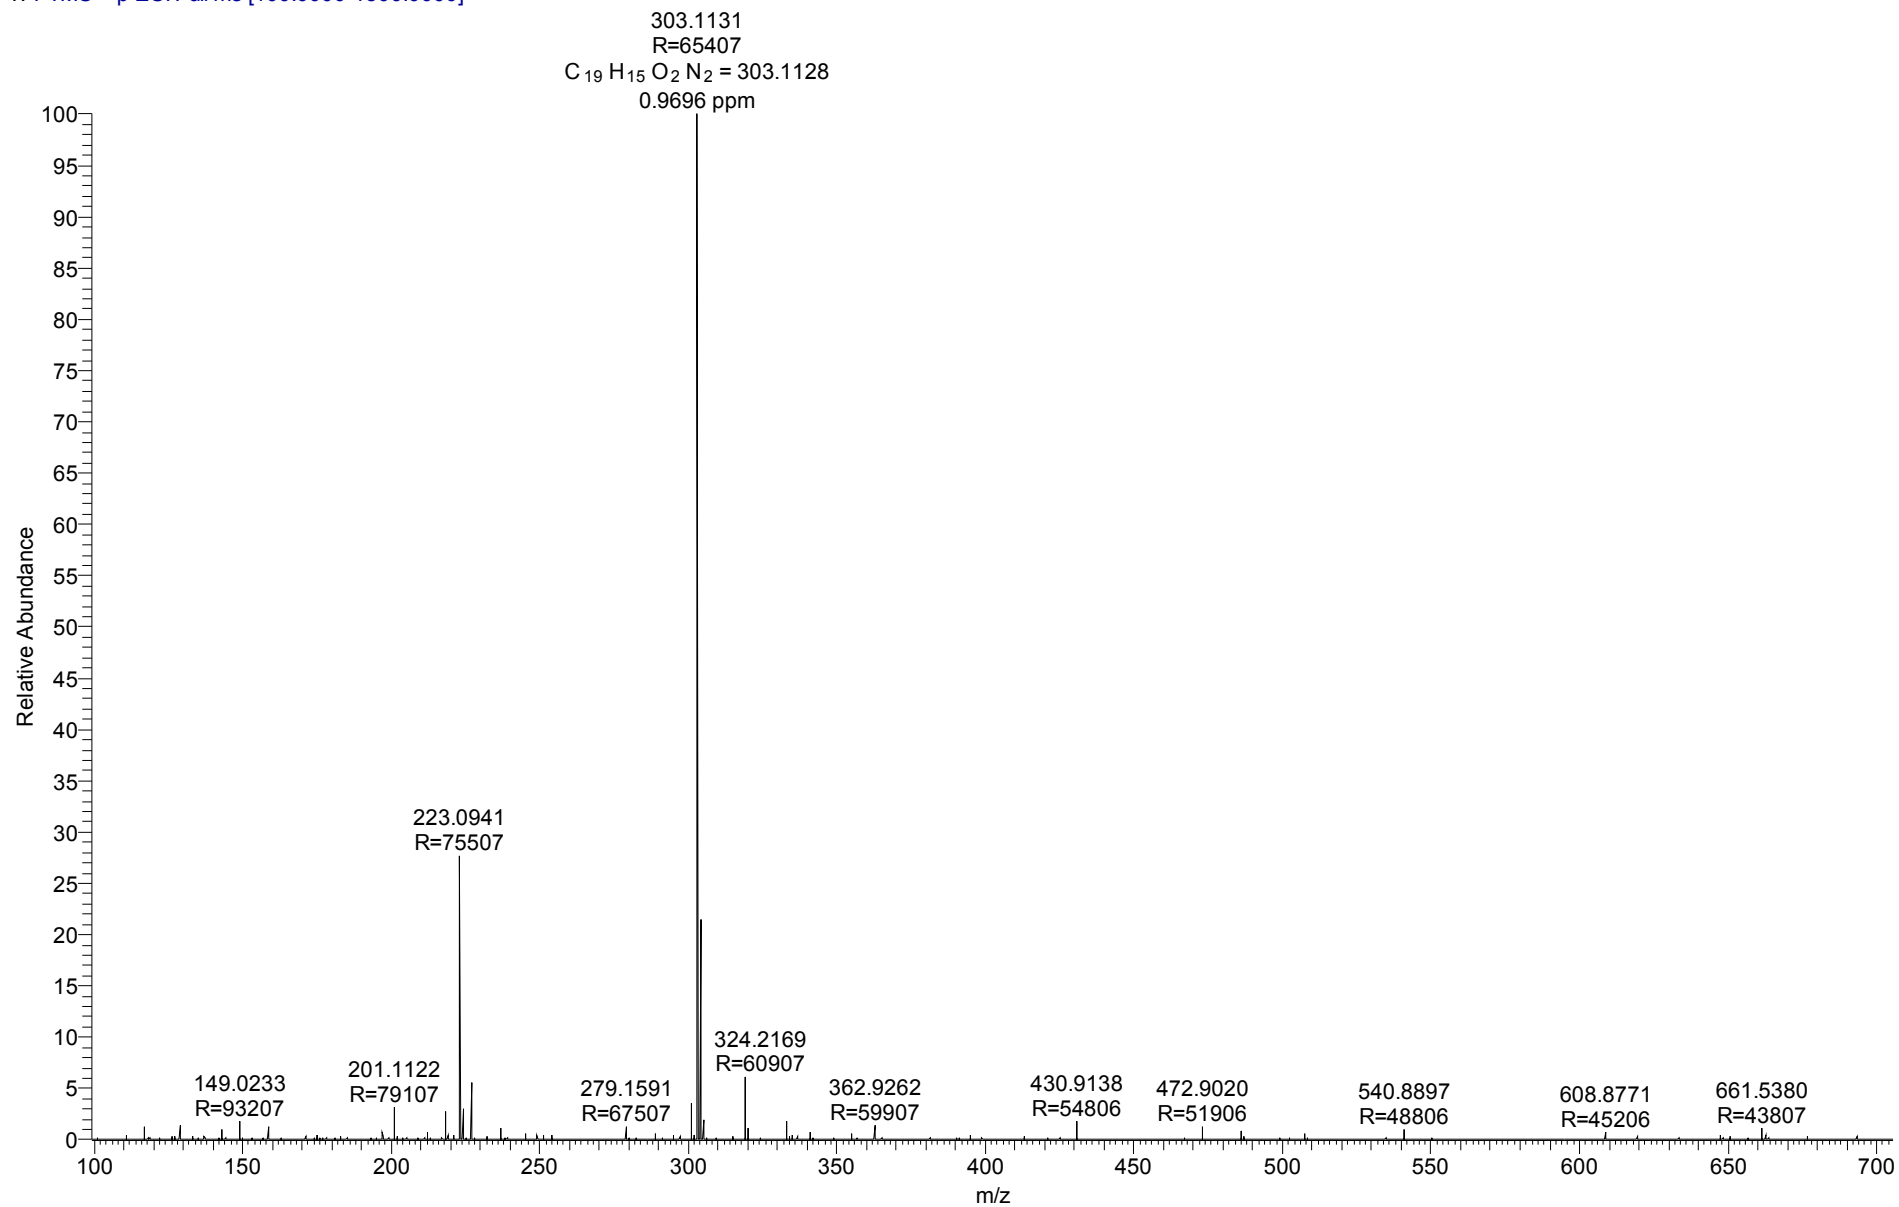

# 3jb

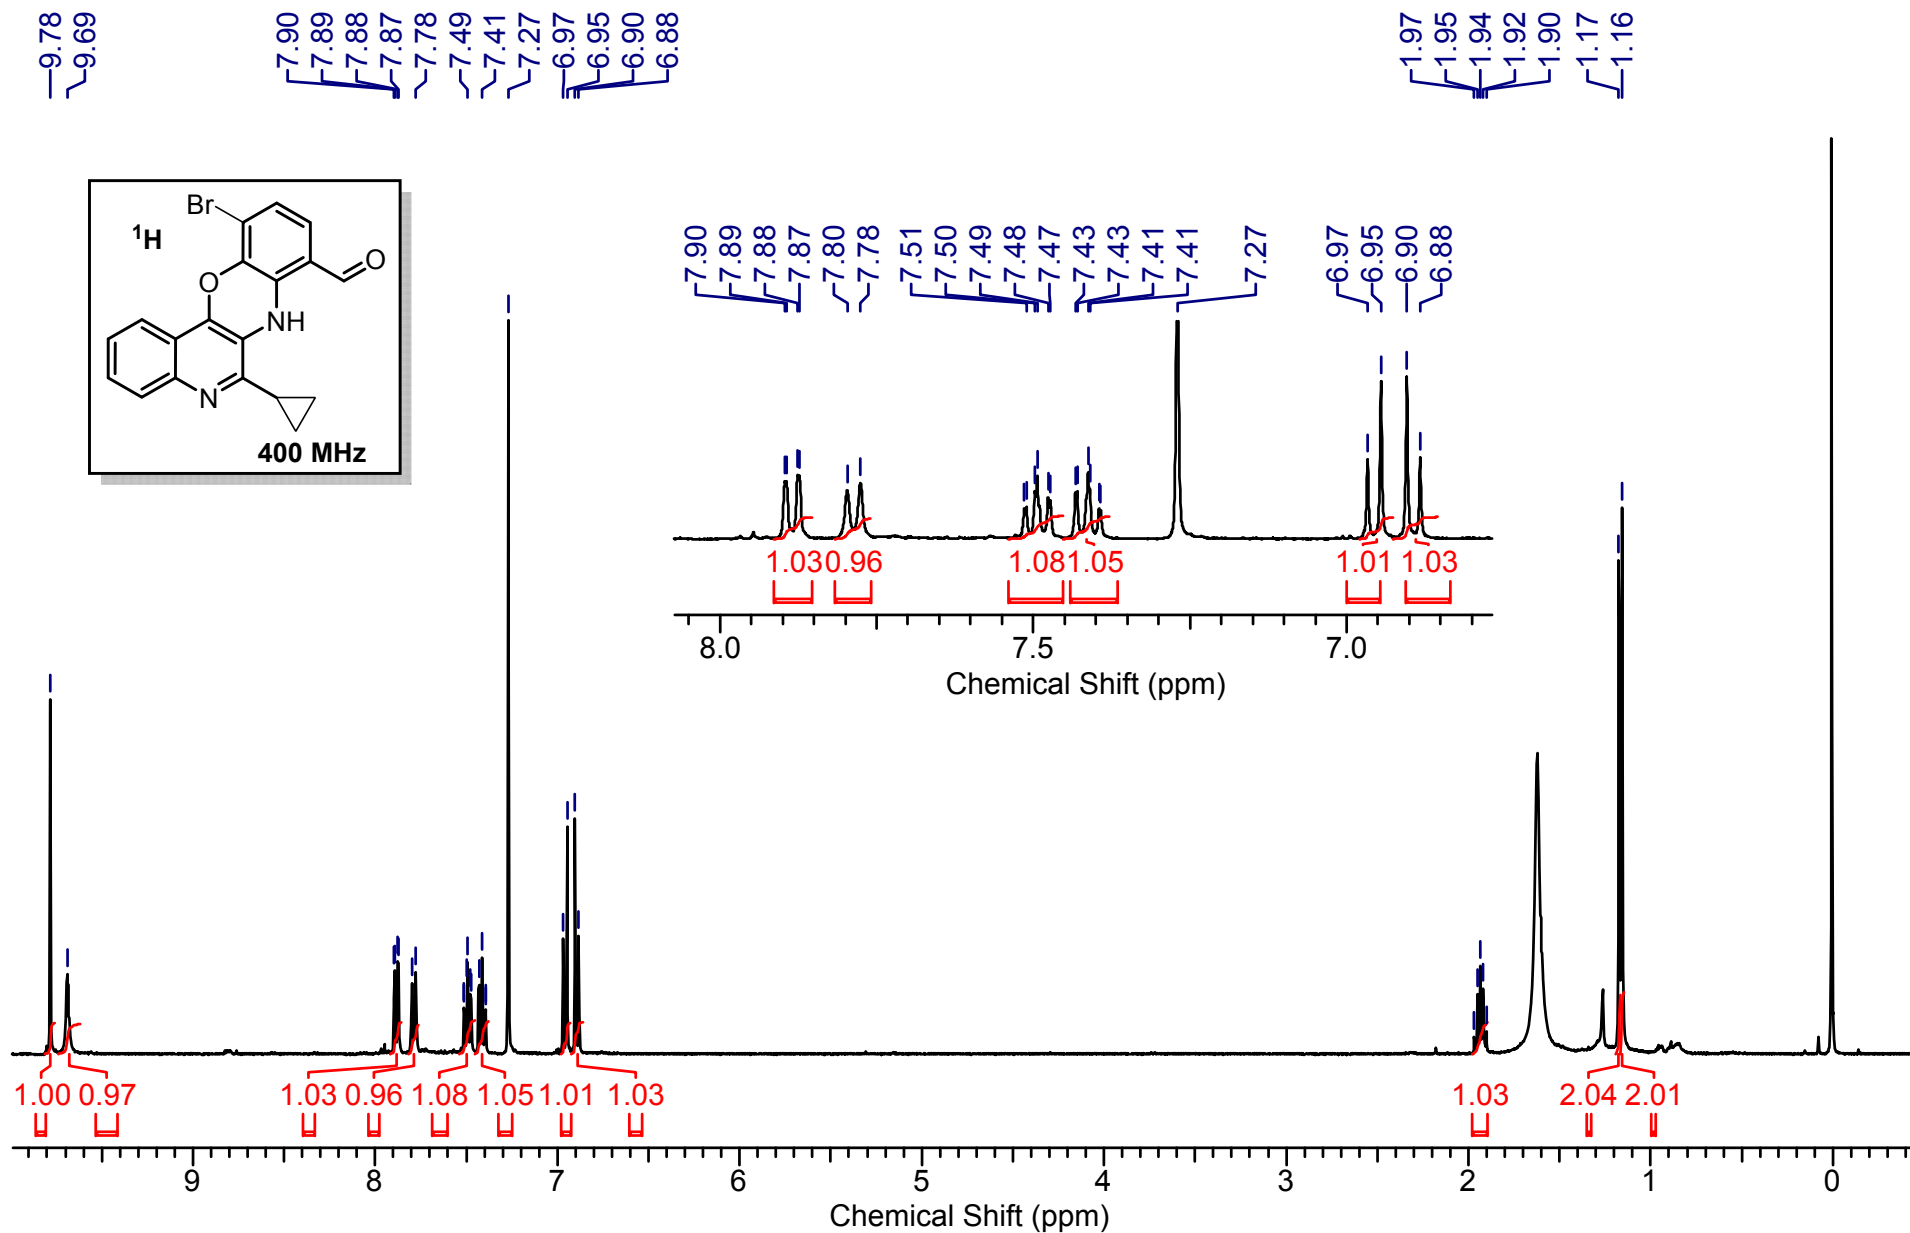

3jb

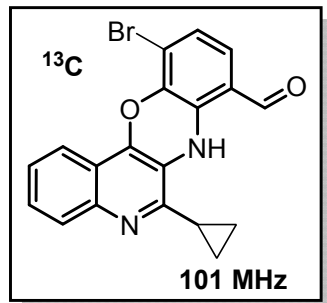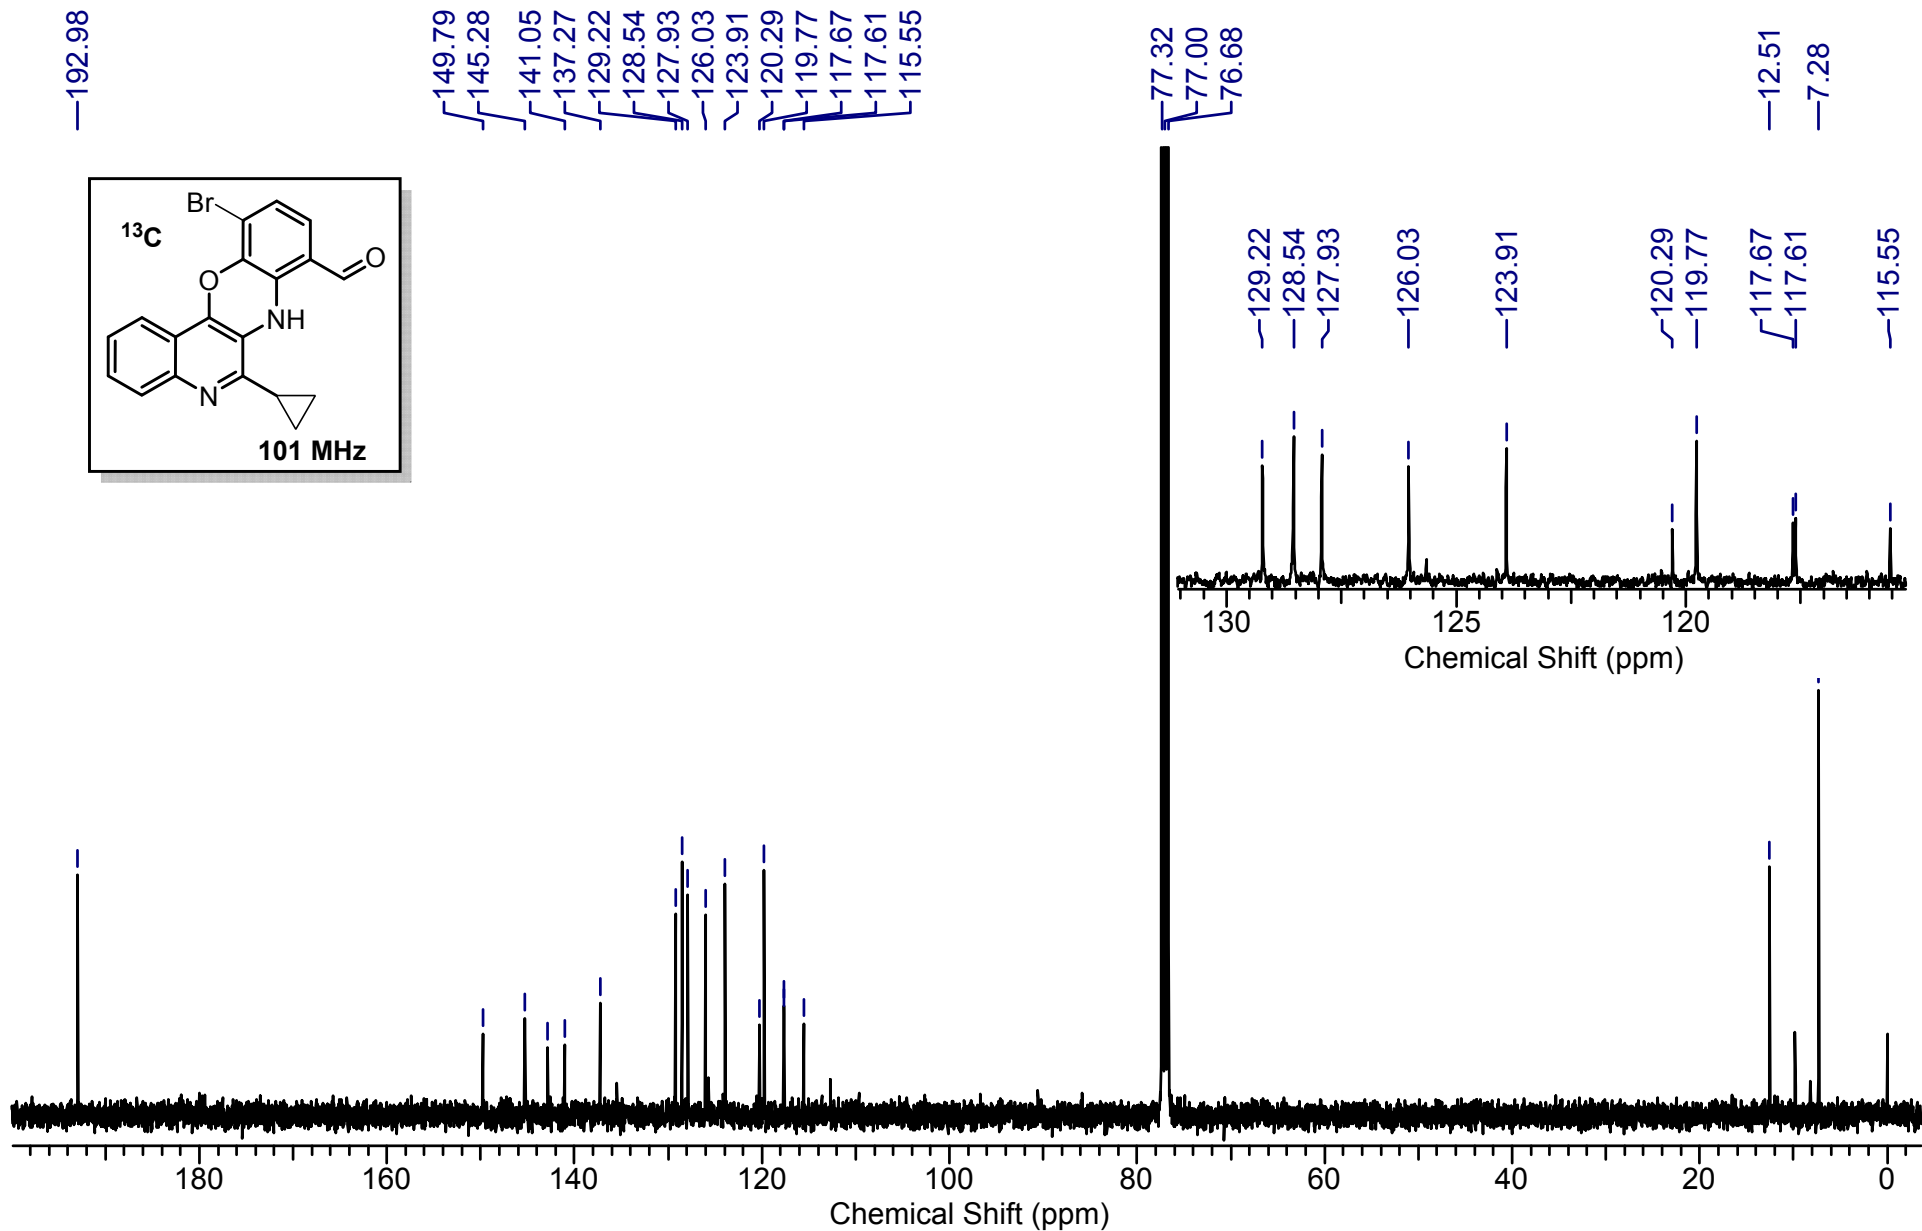

3jb

—192.98

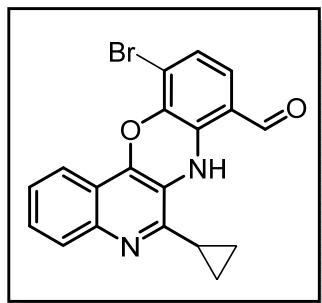

129.22  
128.46  
127.95  
126.05  
123.91  
119.75

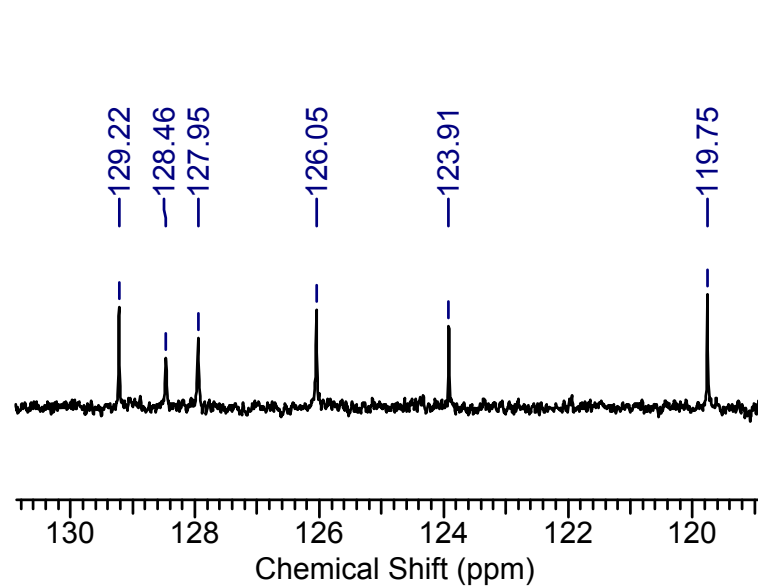

—12.49  
—7.22

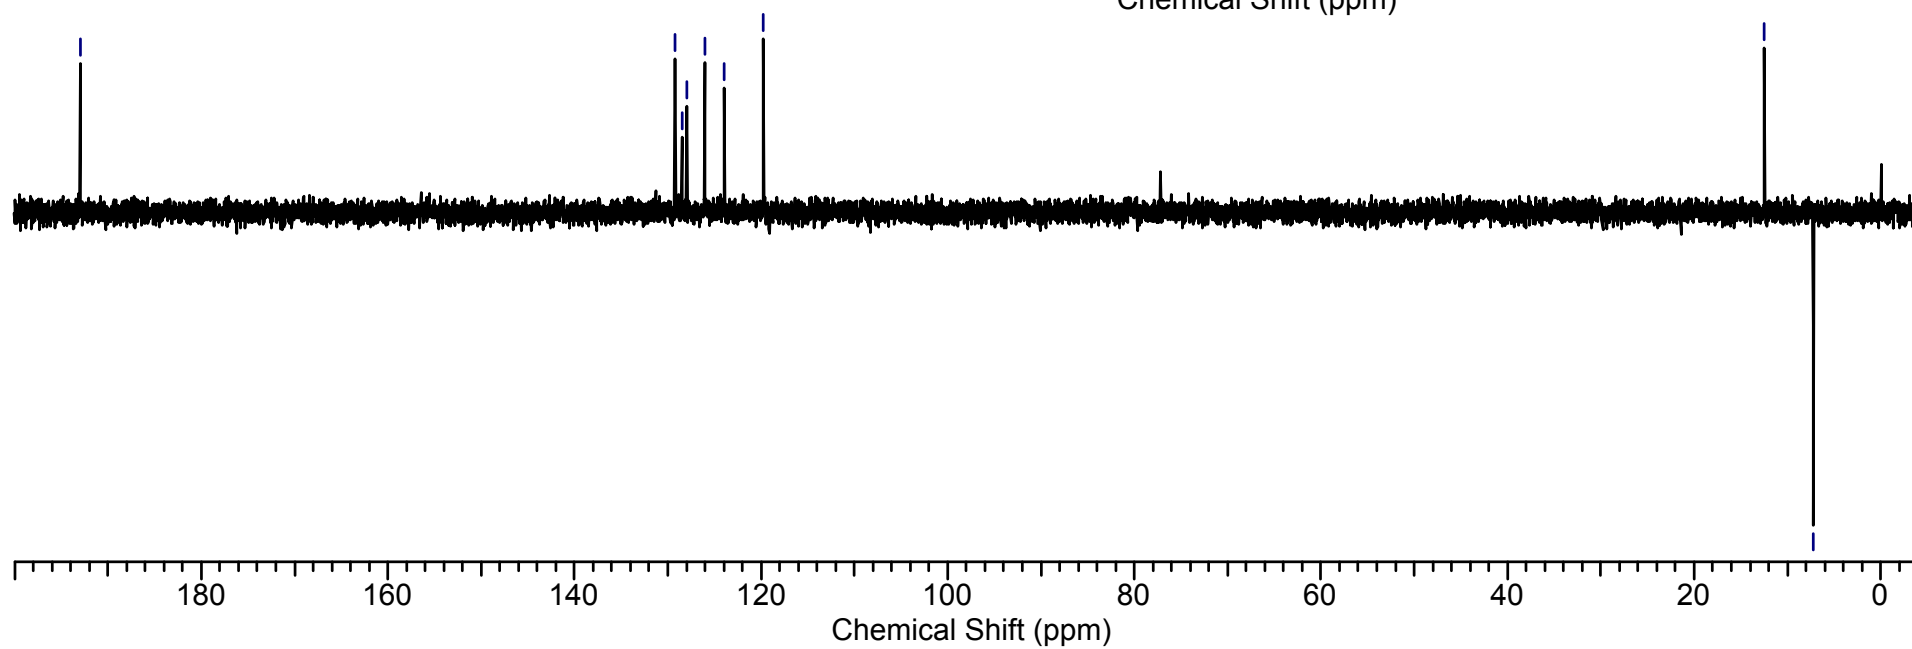

# 3jb

SVH-661 #904 RT: 4.03 AV: 1 NL: 5.87E7  
T: FTMS + p ESI Full ms [100.0000-1500.0000]

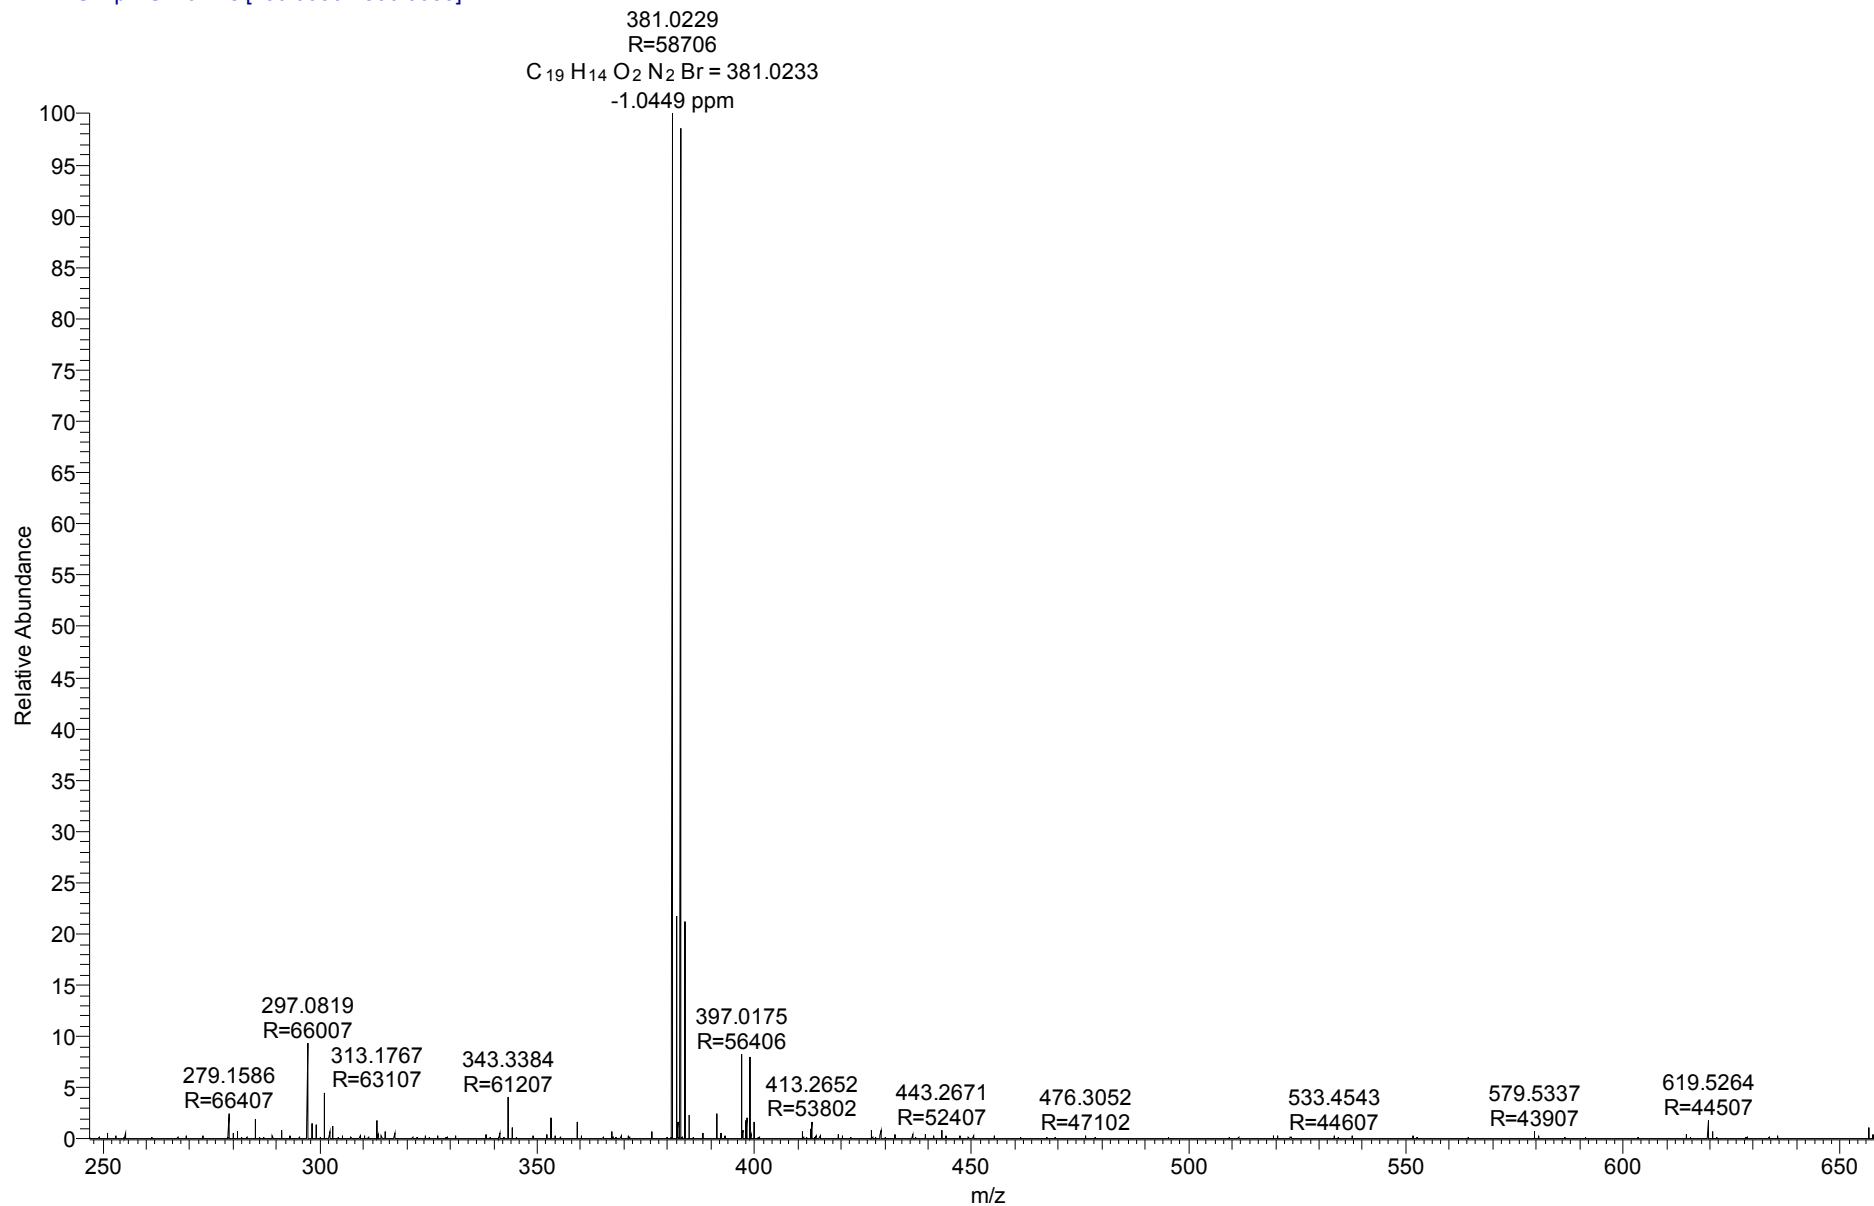

3aj

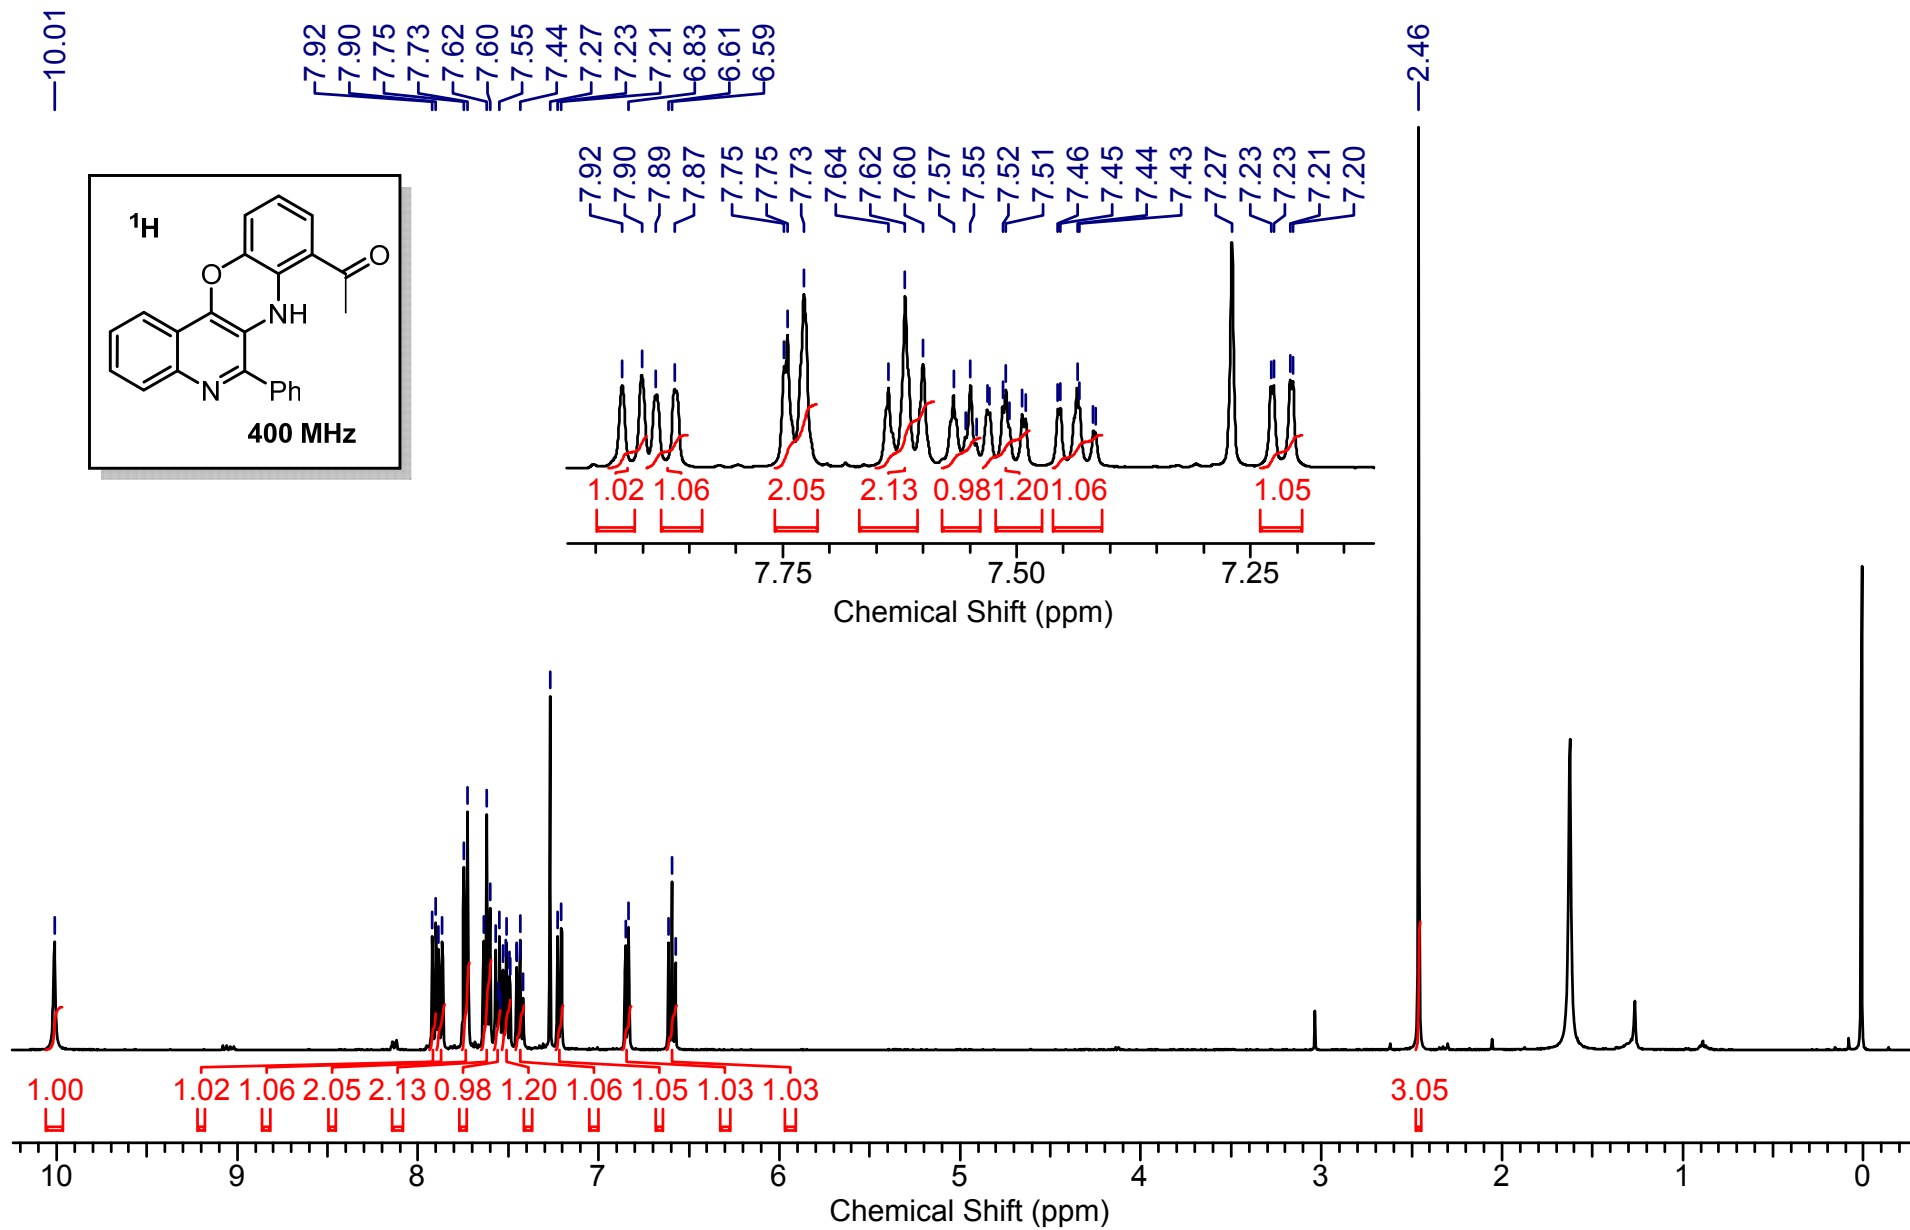

# 3aj

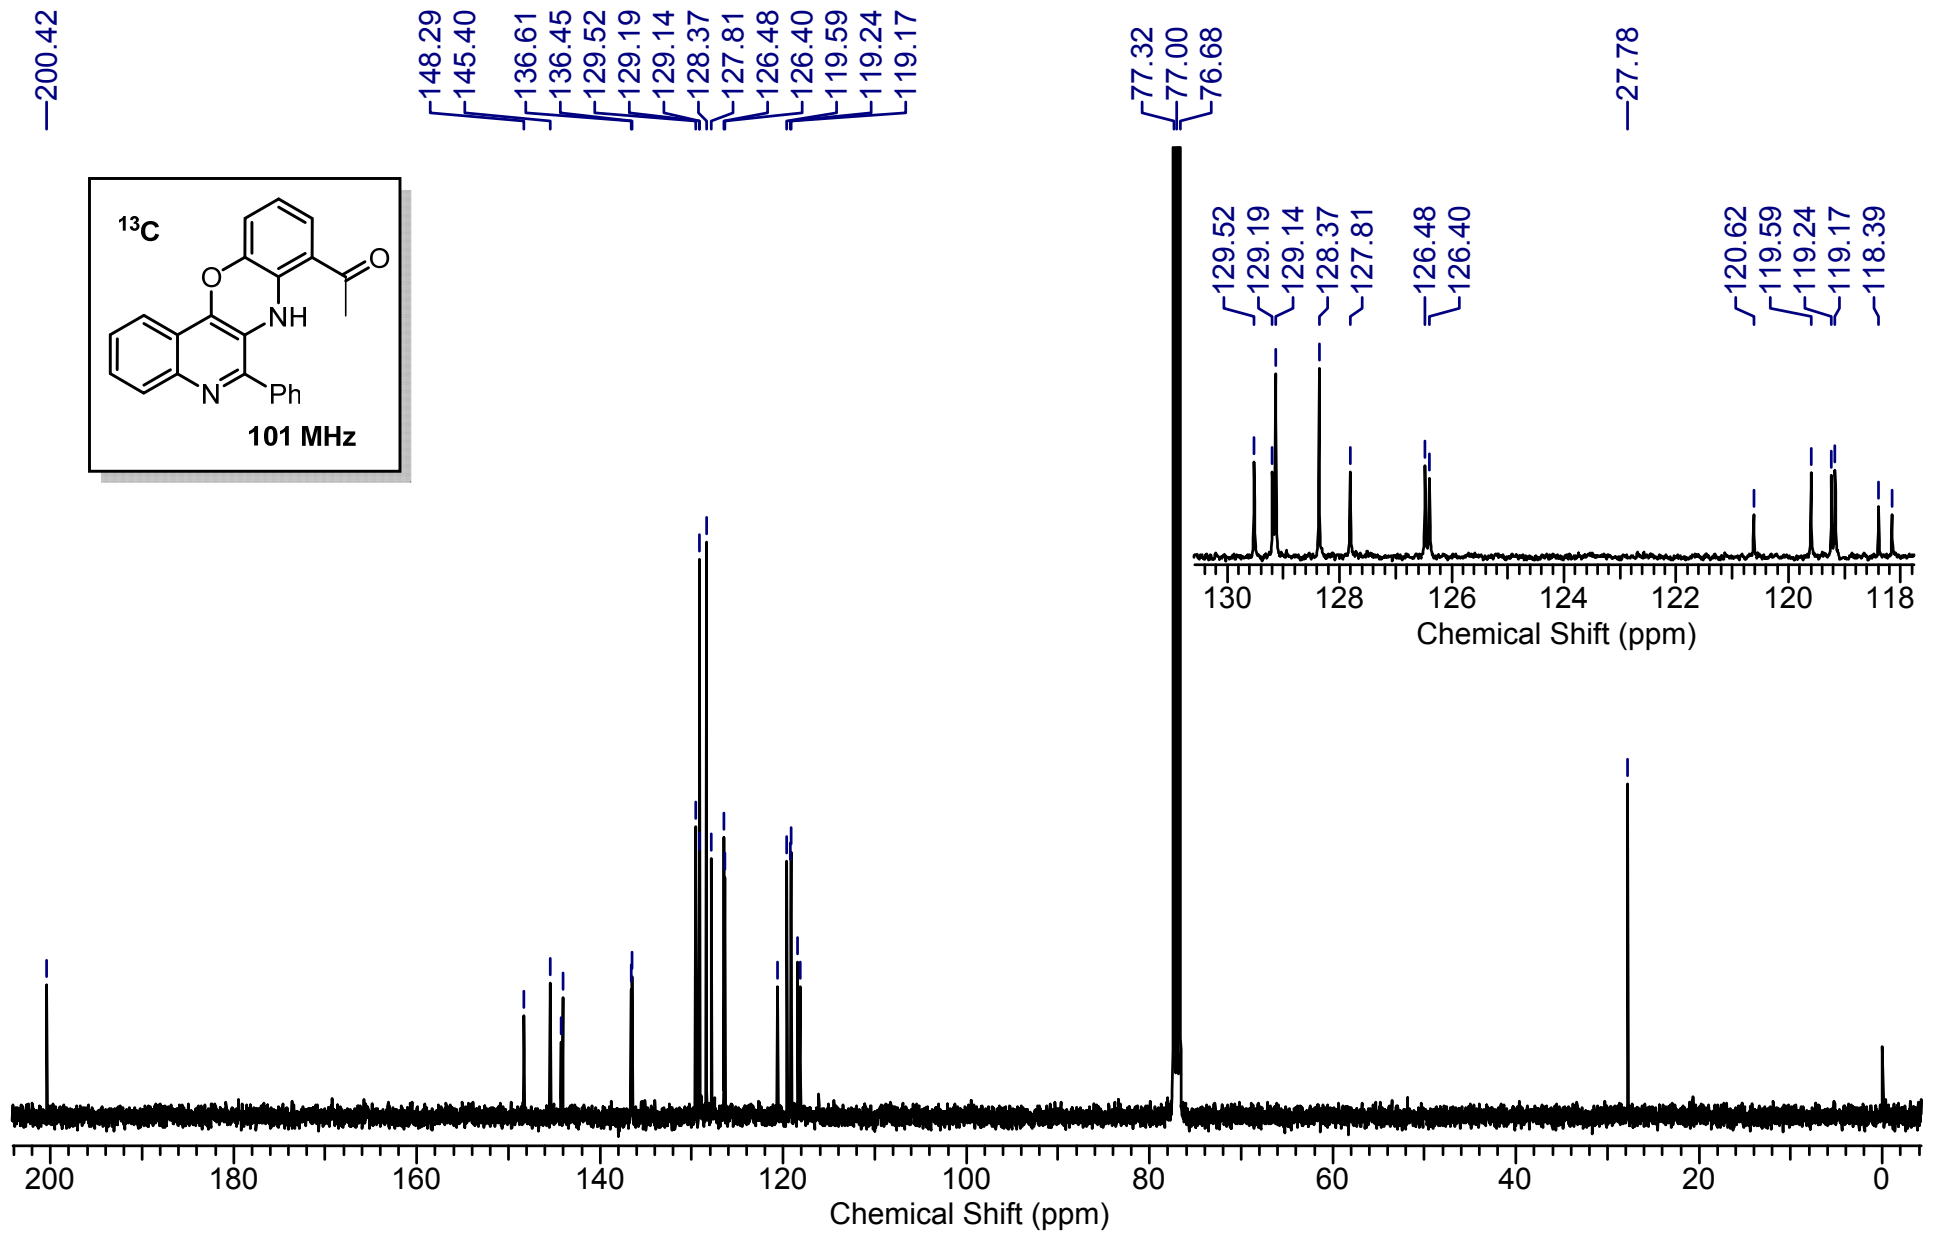



3aj

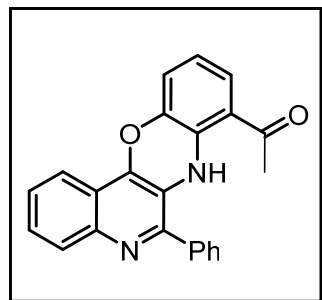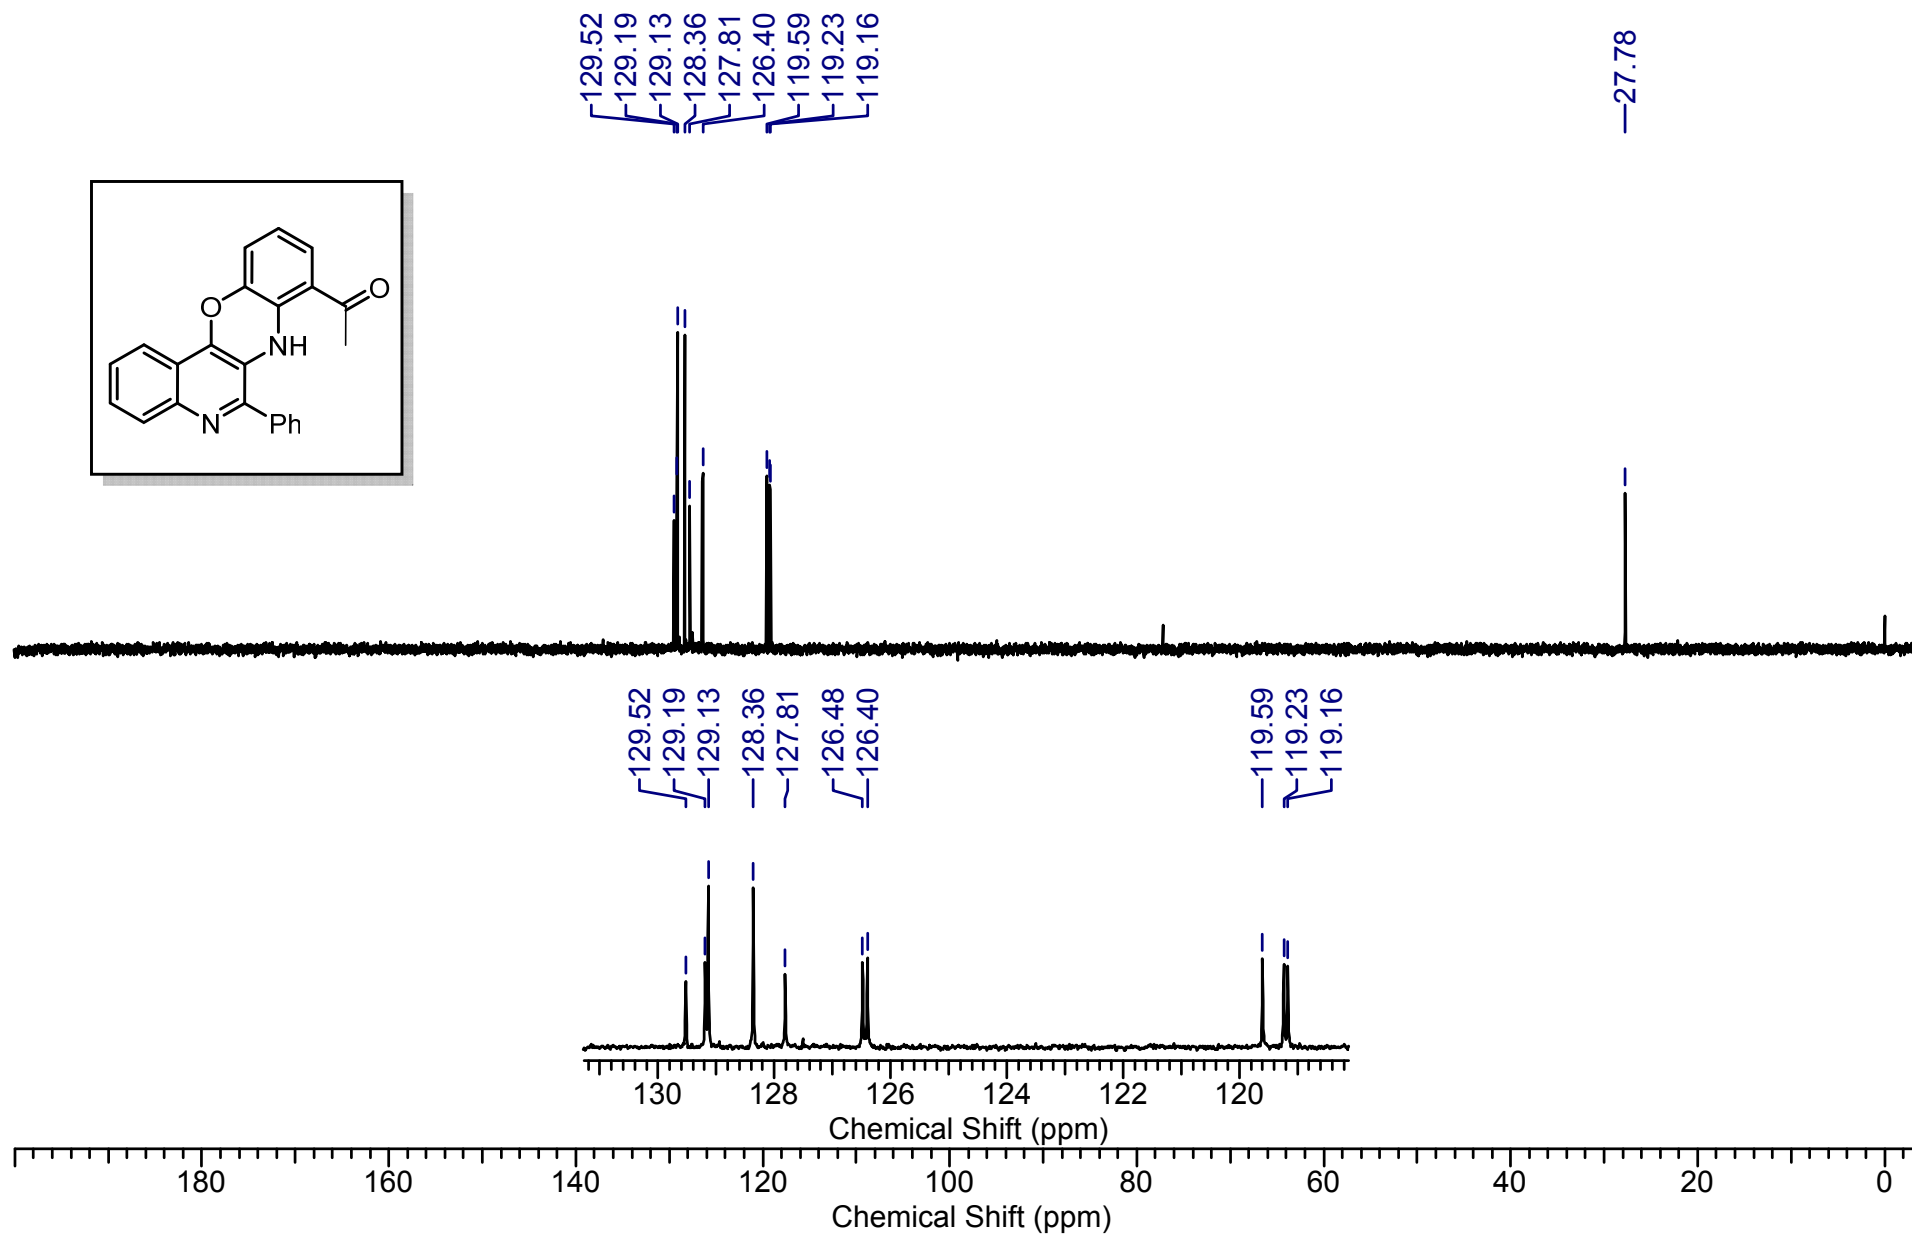

# 3aj

652 #574 RT: 2.60 AV: 1 NL: 2.55E7  
T: FTMS + p ESI Full ms [100.0000-1500.0000]

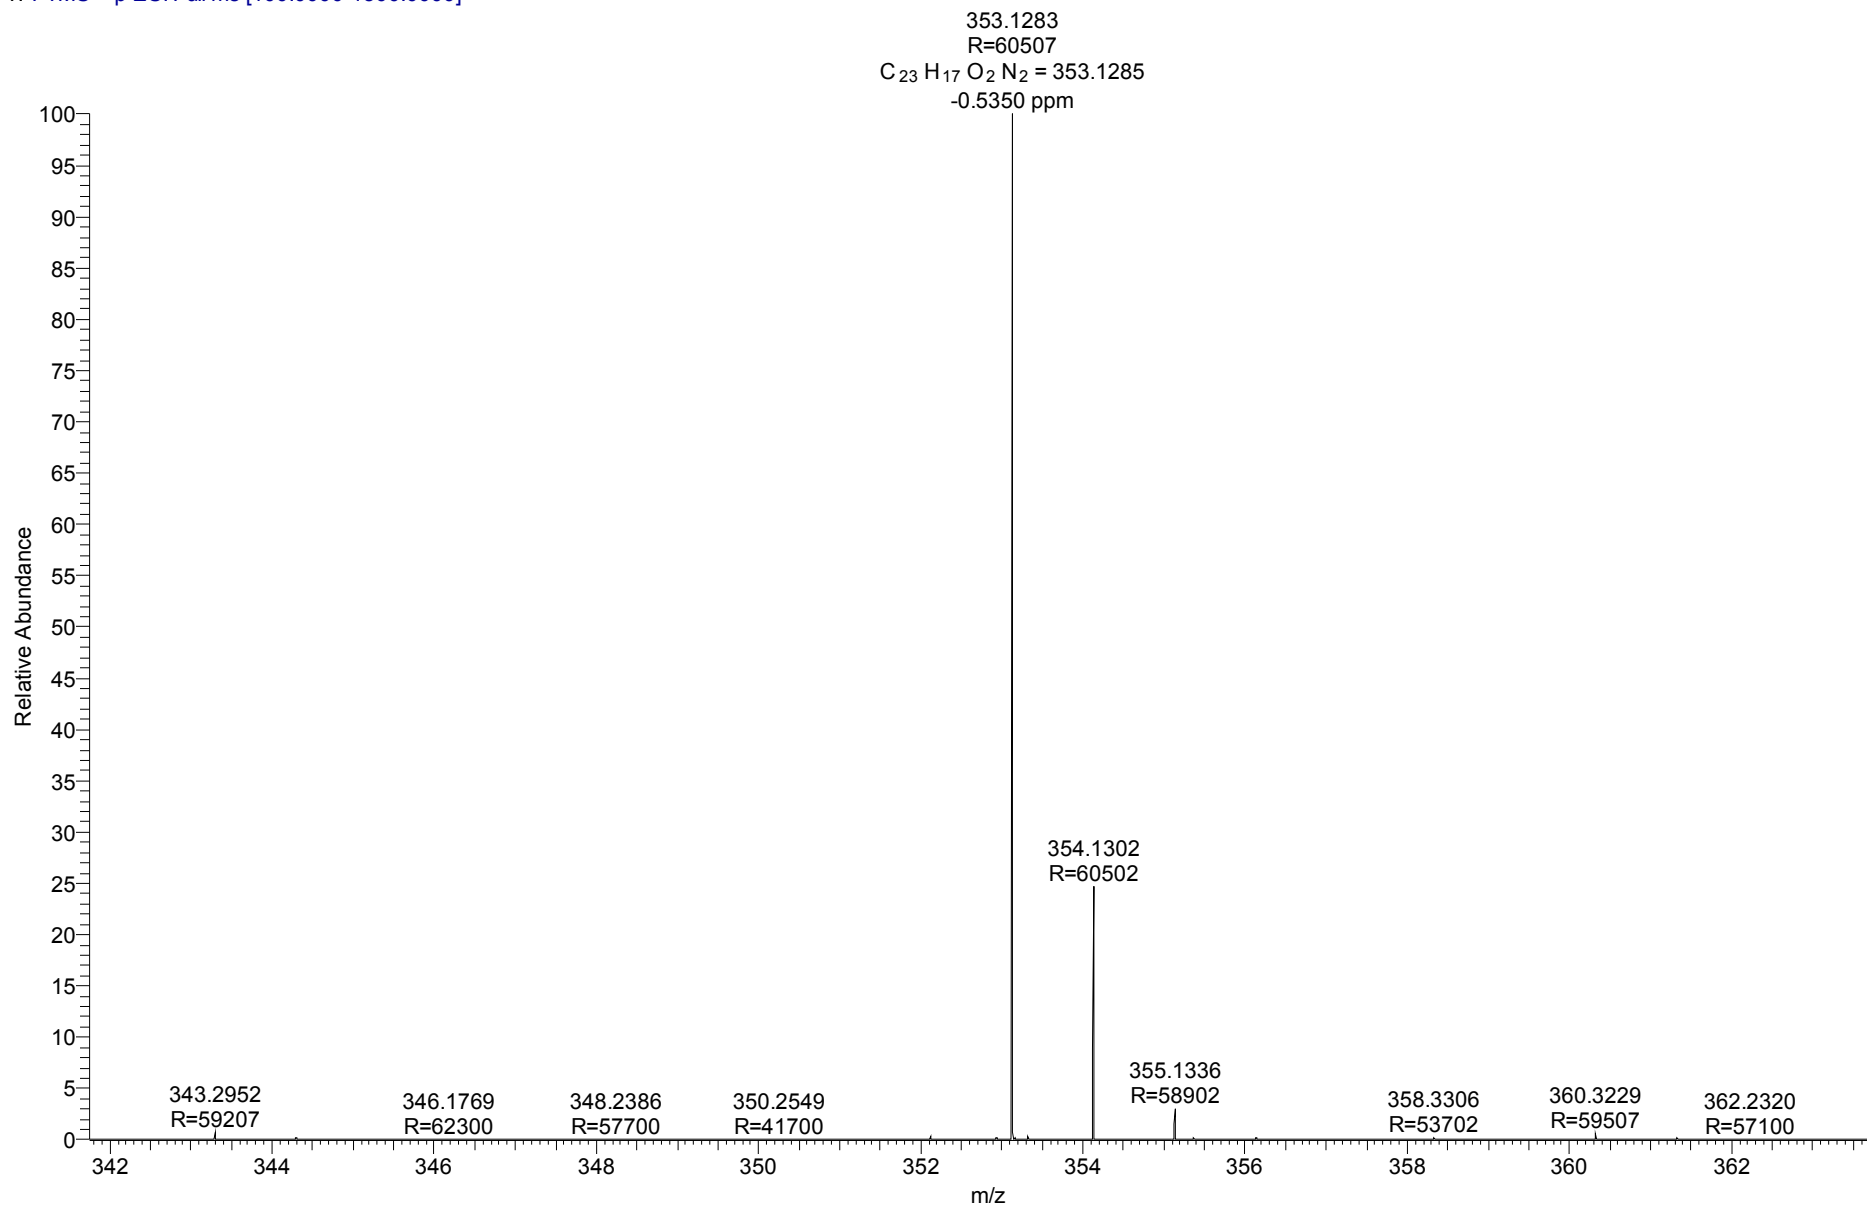

5

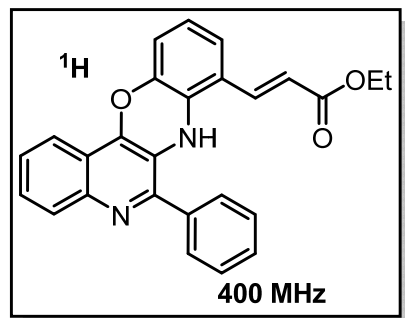

7.94  
7.92  
7.75  
7.75  
7.73  
7.60  
7.58  
7.52  
7.38  
7.34  
7.27  
6.79  
6.72  
6.70  
6.19  
6.15  
5.64  
4.27  
4.25  
4.23  
4.22  
1.36  
1.35  
1.33  
0.01

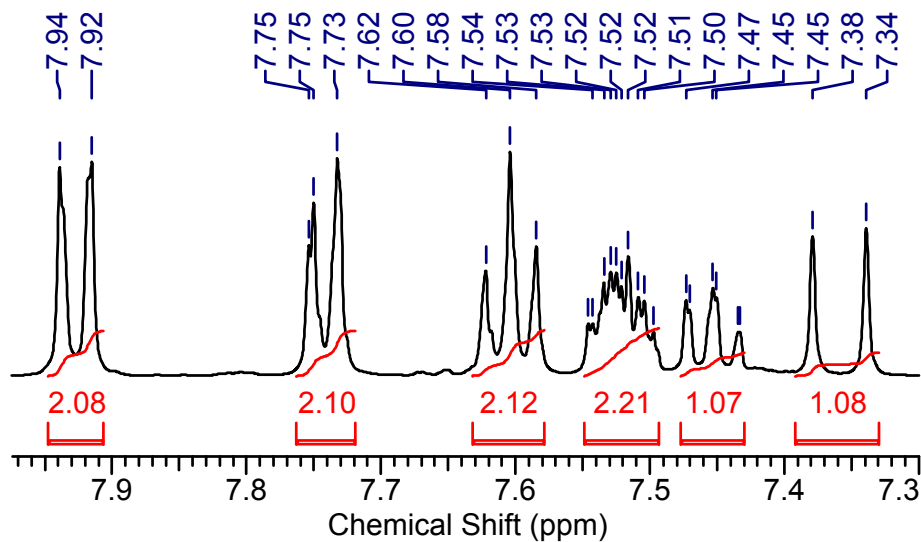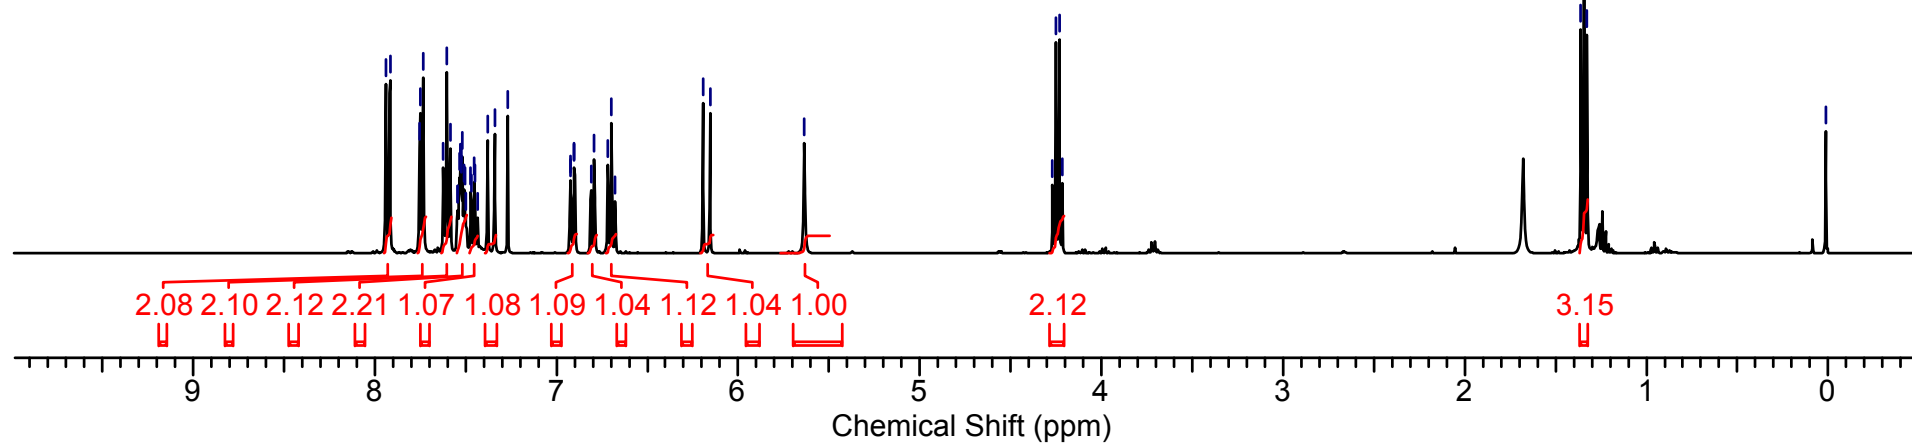

5

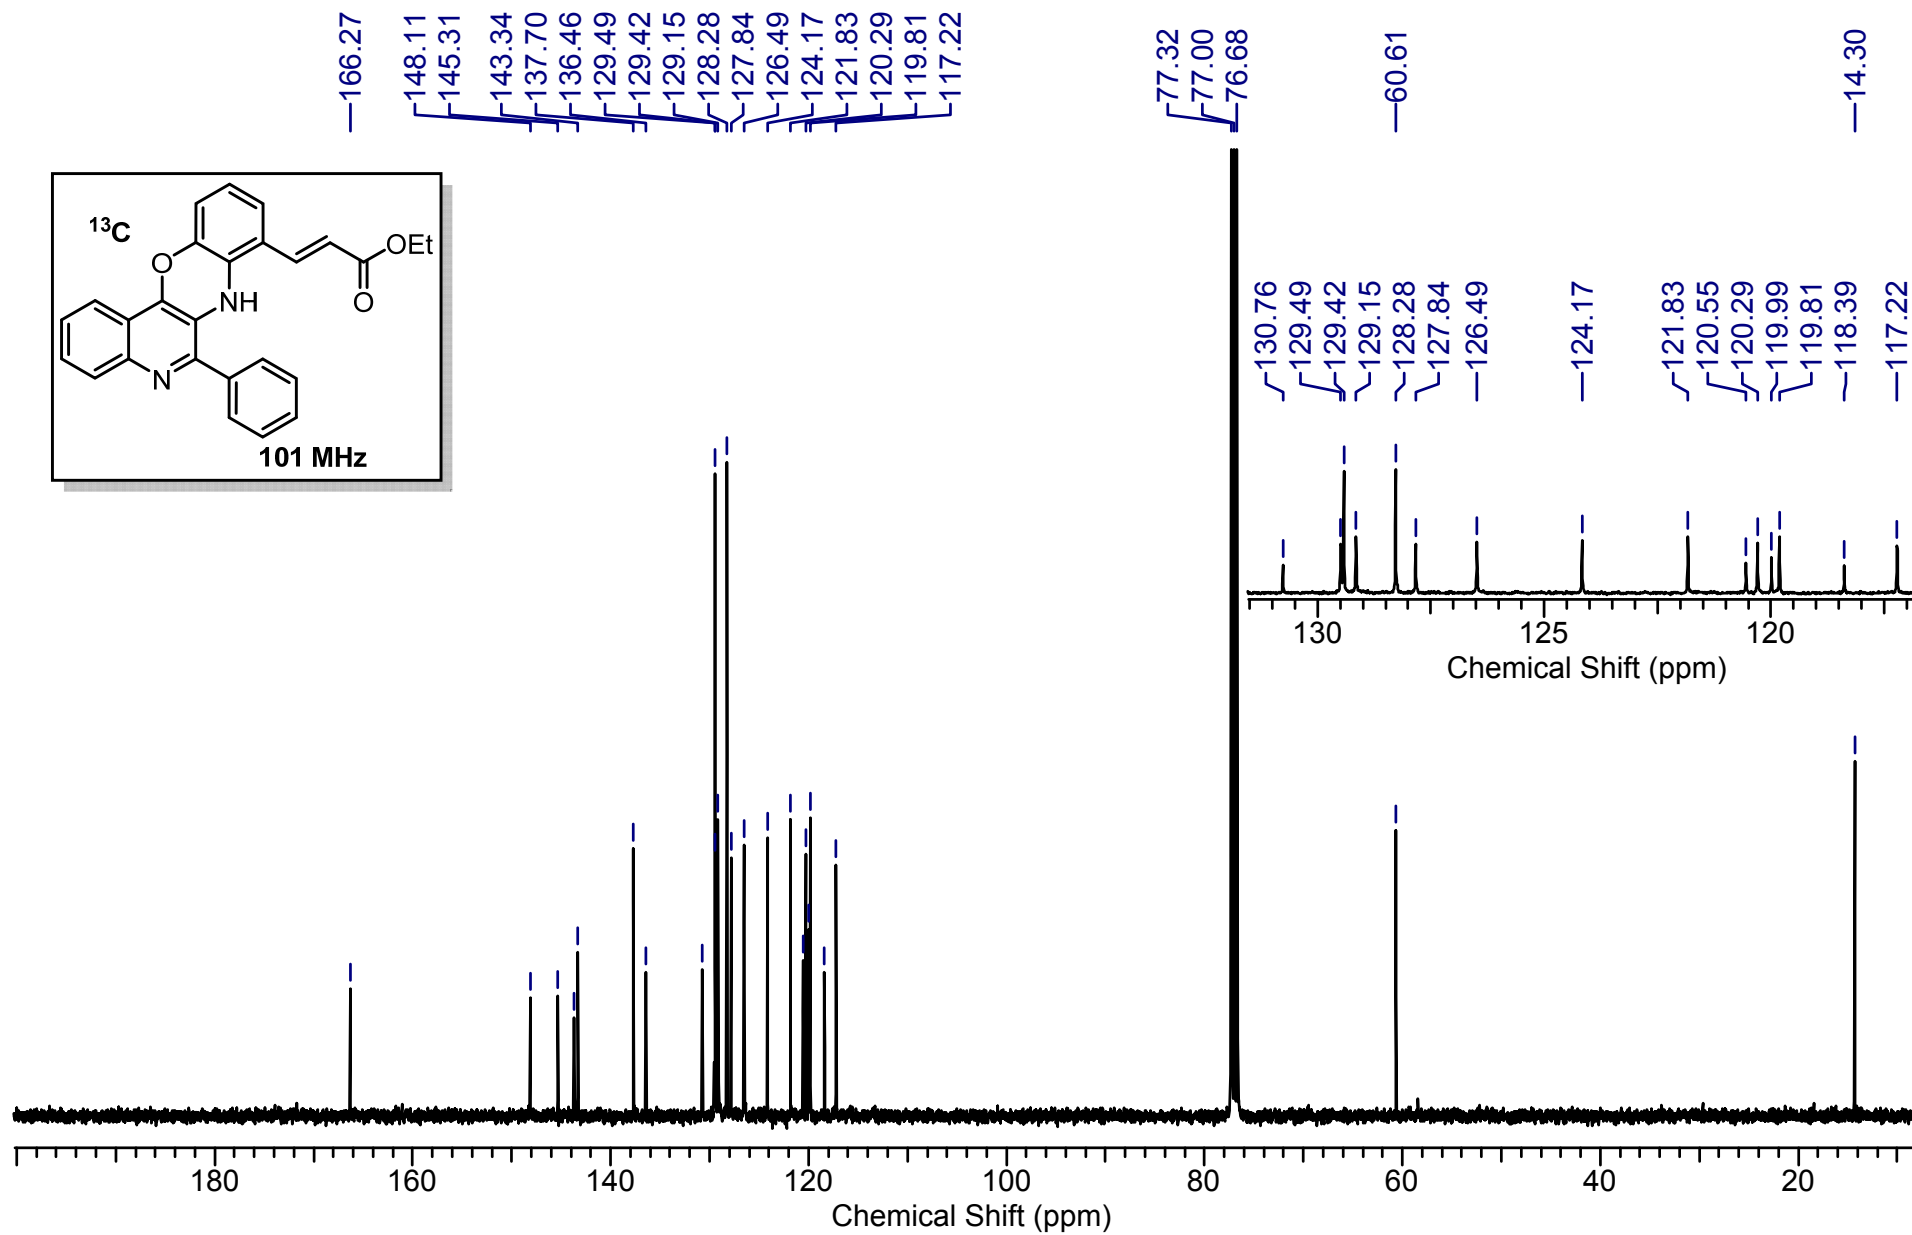

5

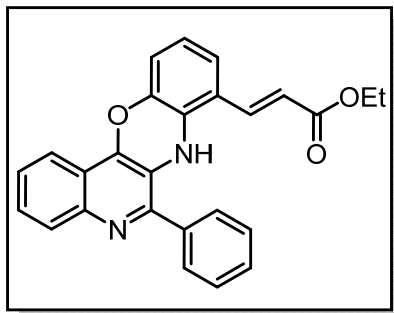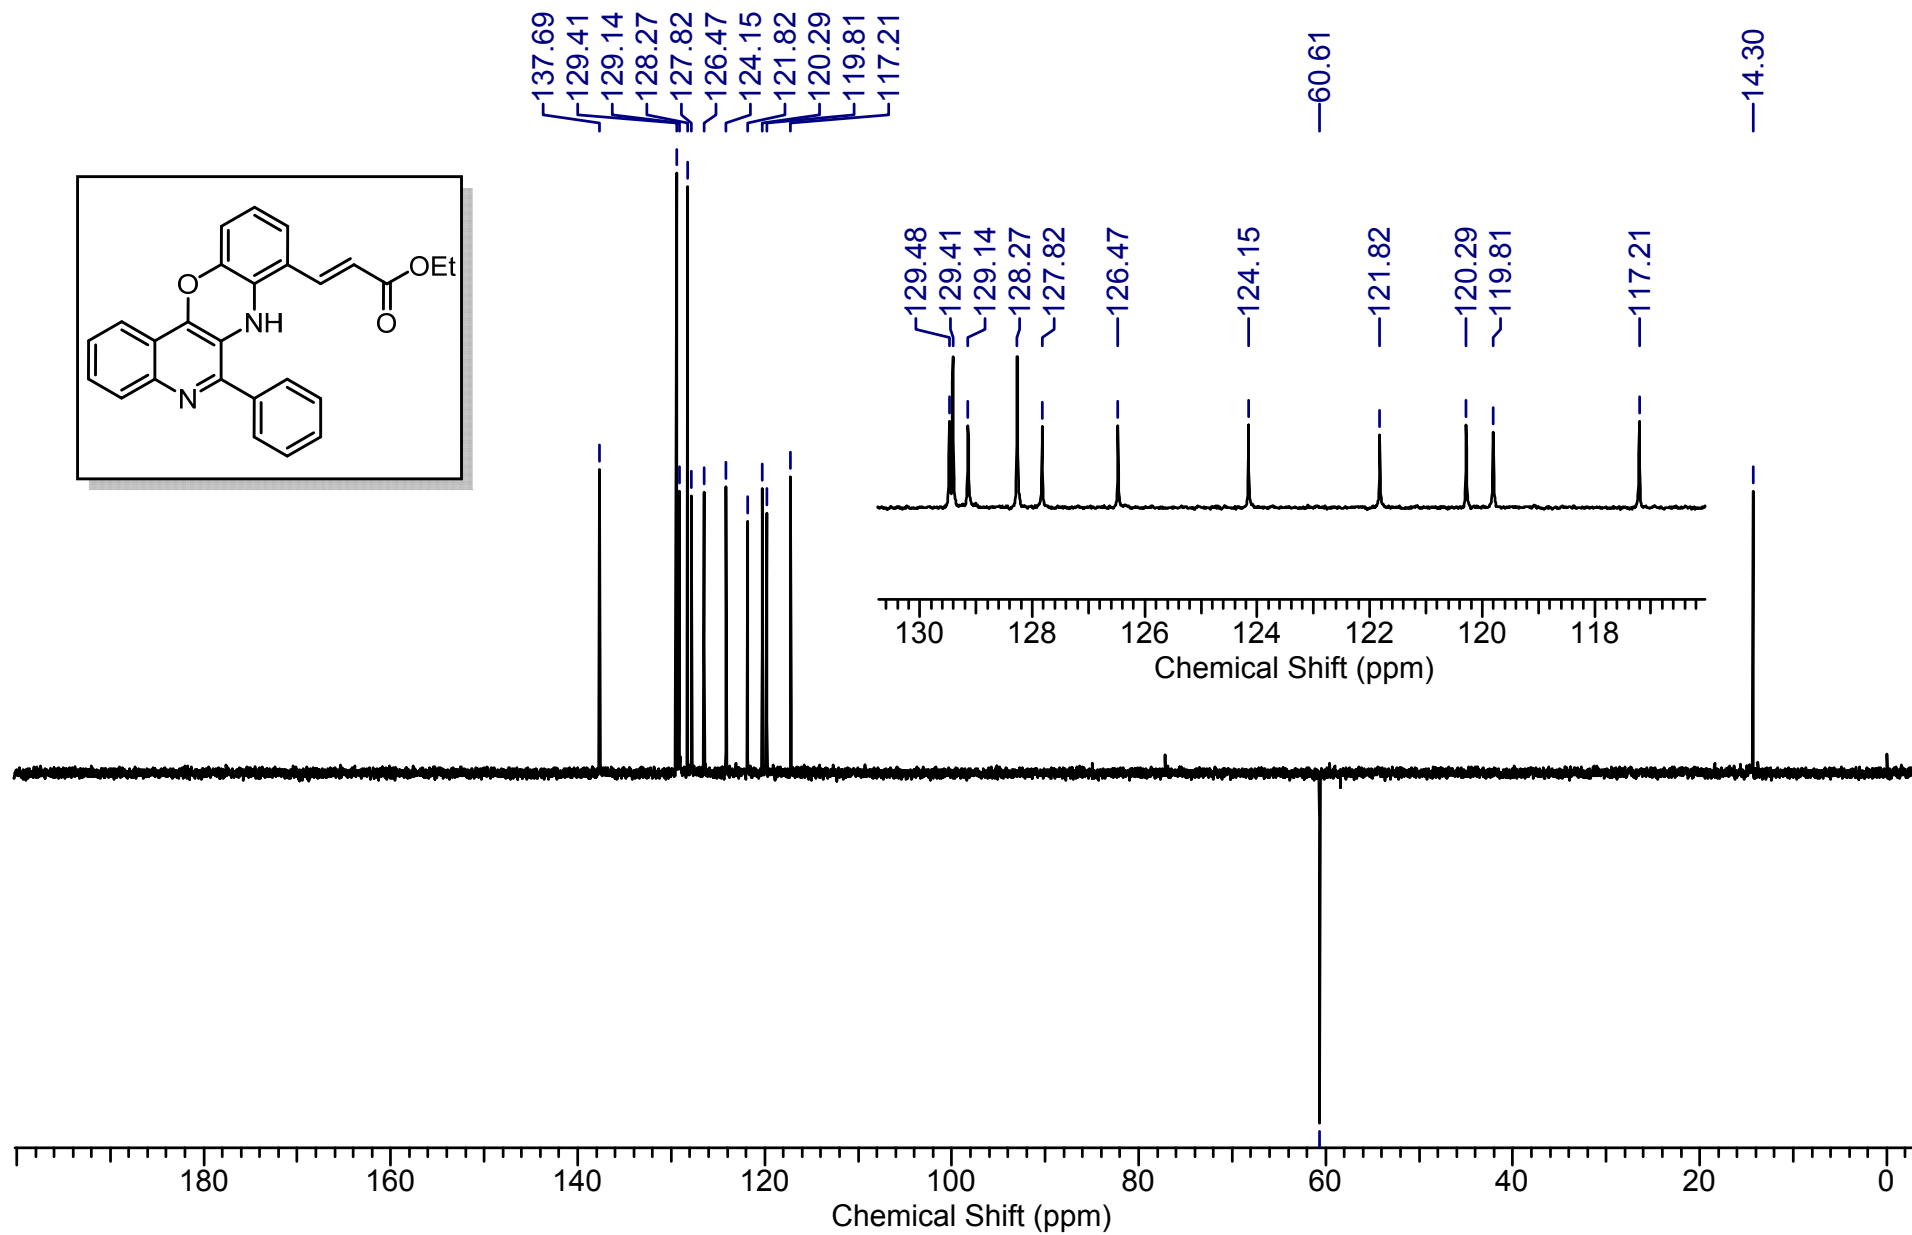

5

SH-685 #394 RT: 2.11 AV: 1 NL: 1.31E8  
T: FTMS + p ESI Full ms [100.0000-1500.0000]

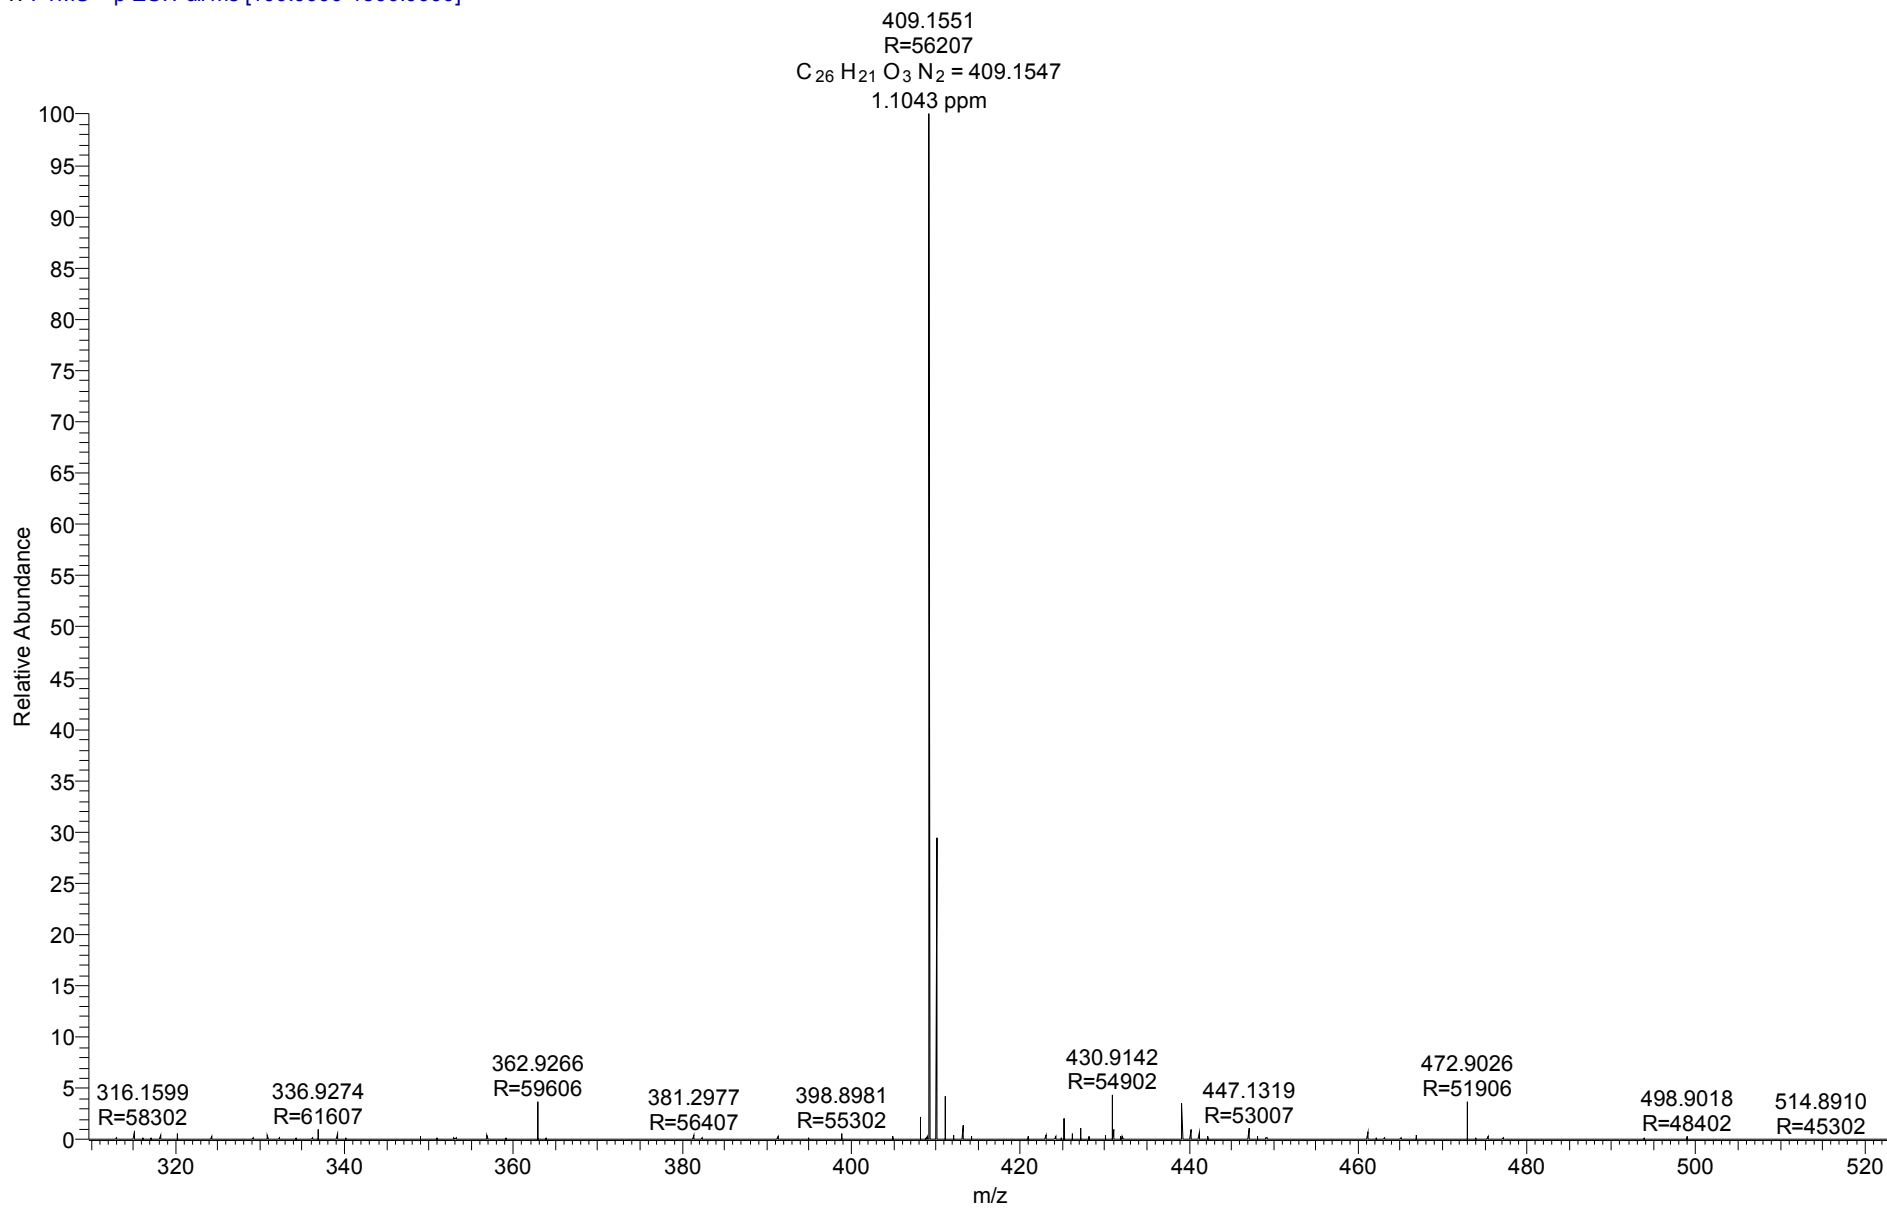

6

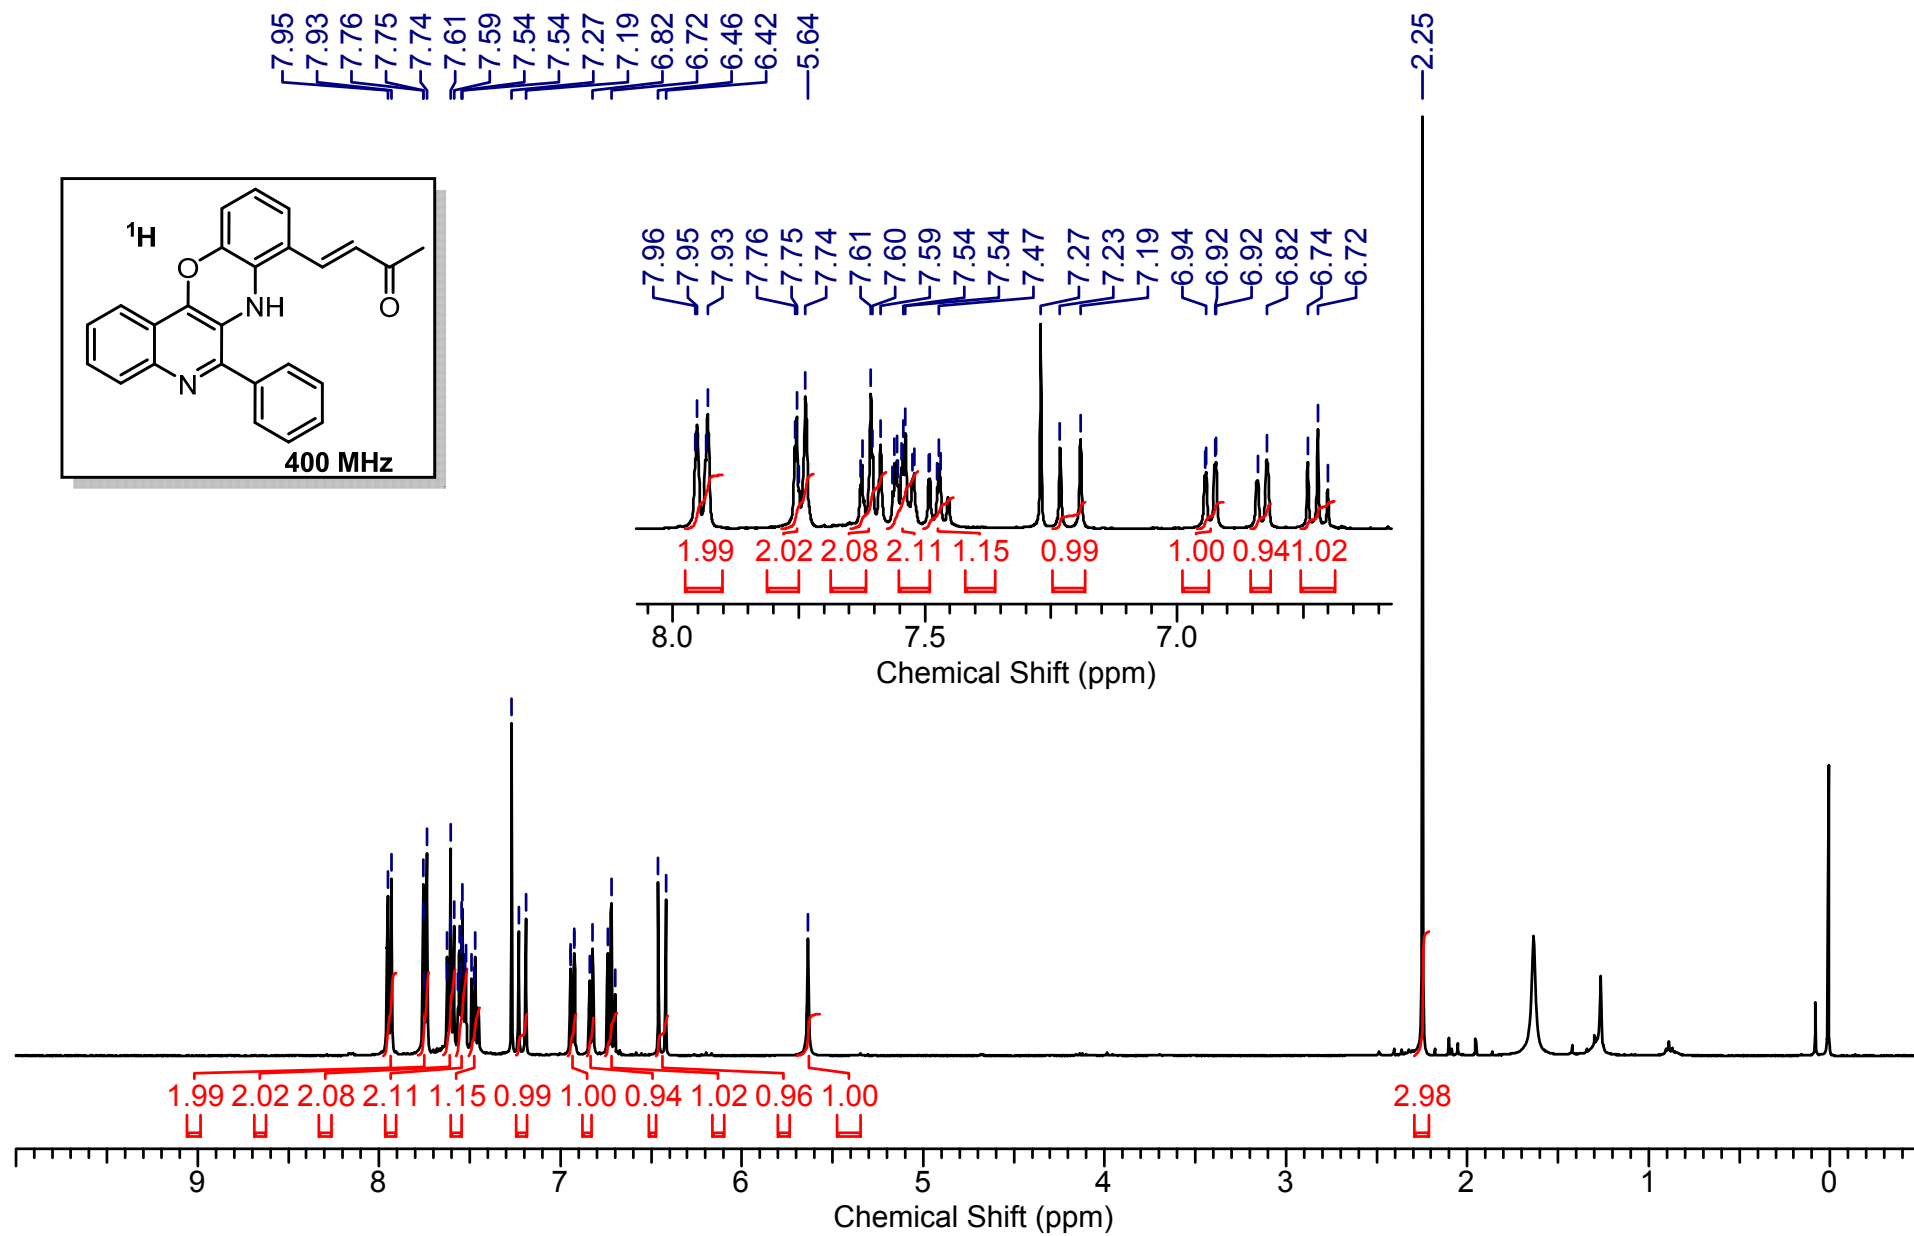

6

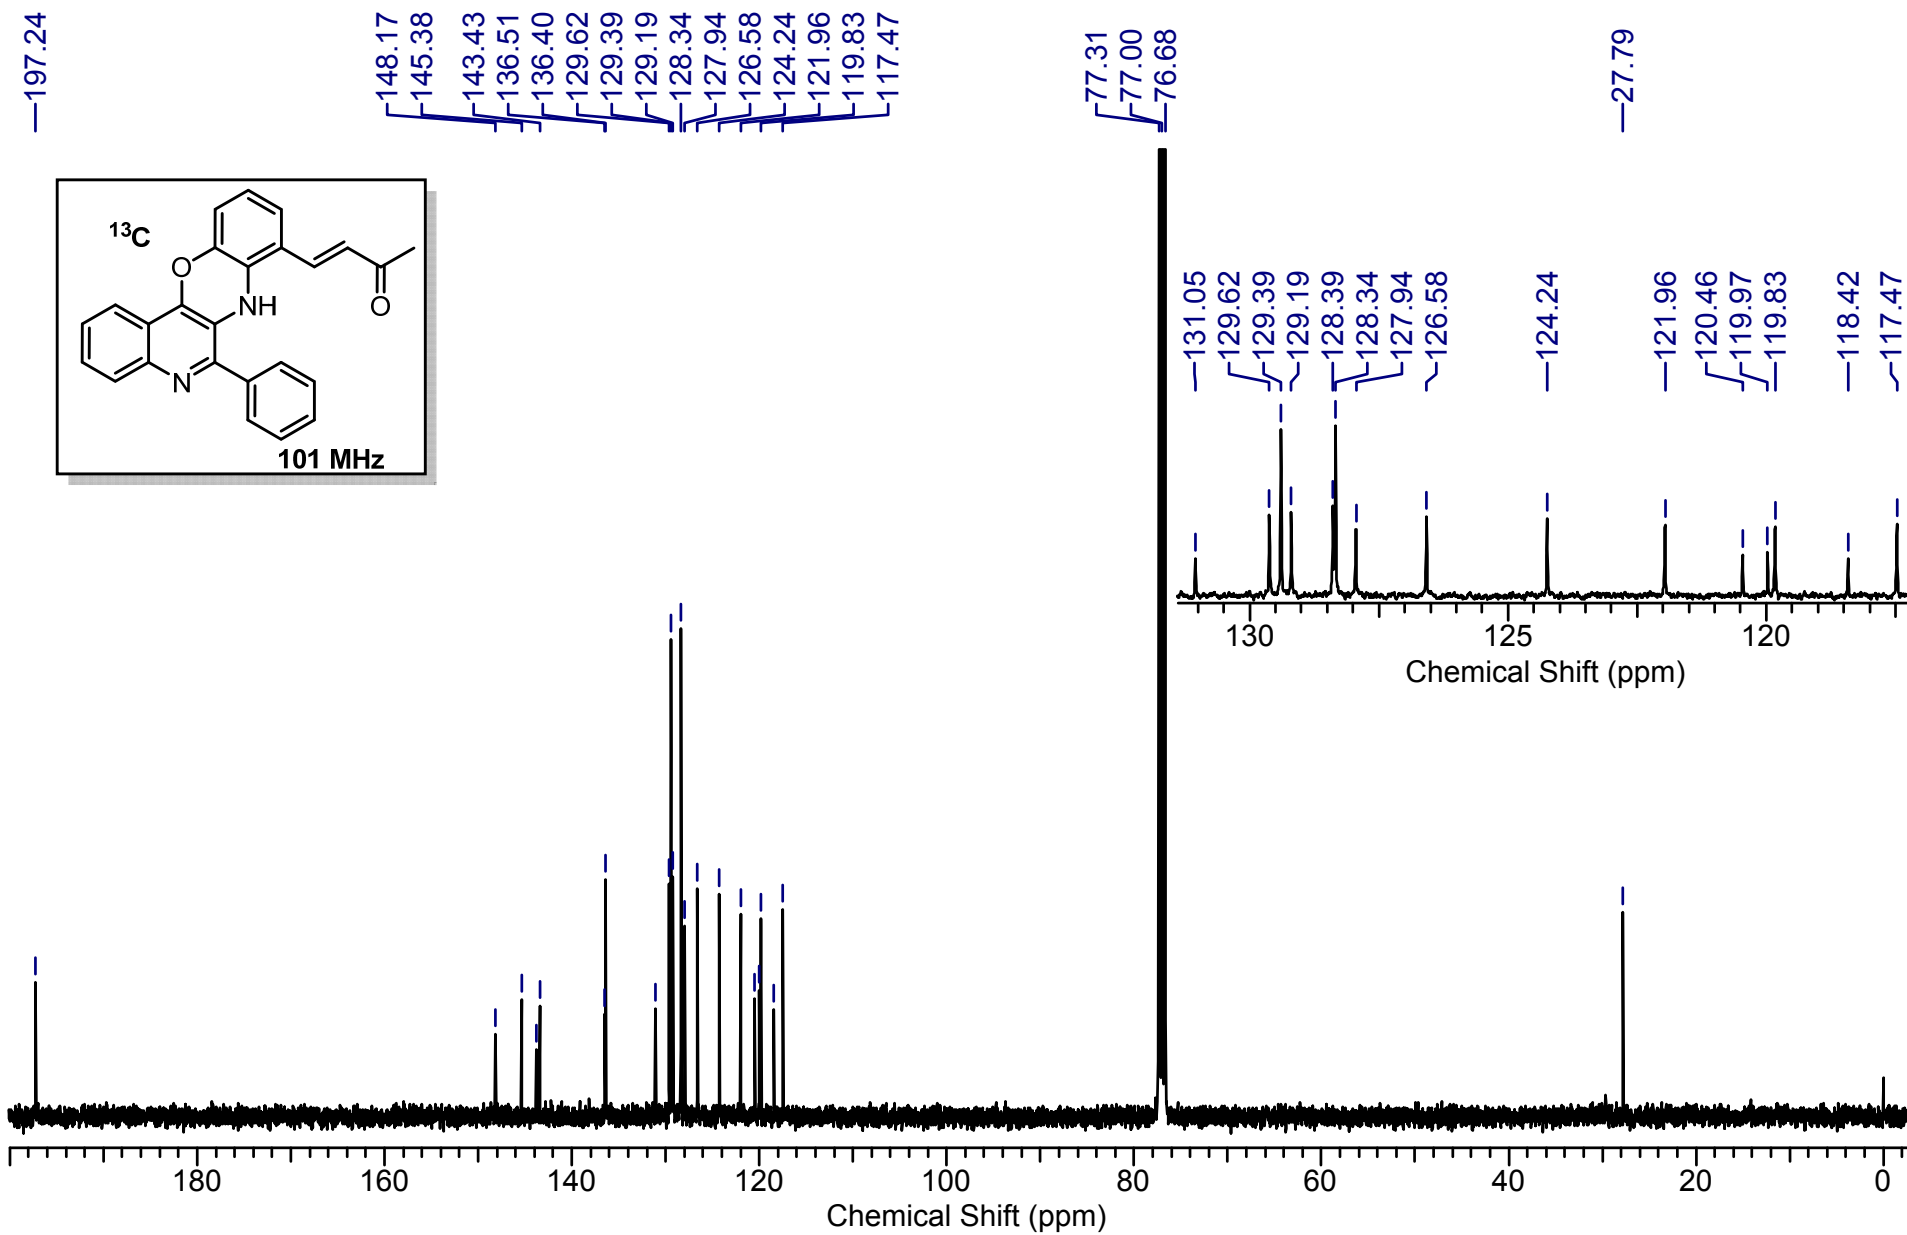



6

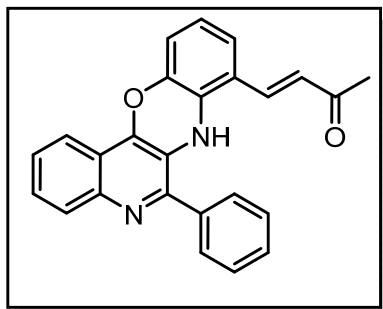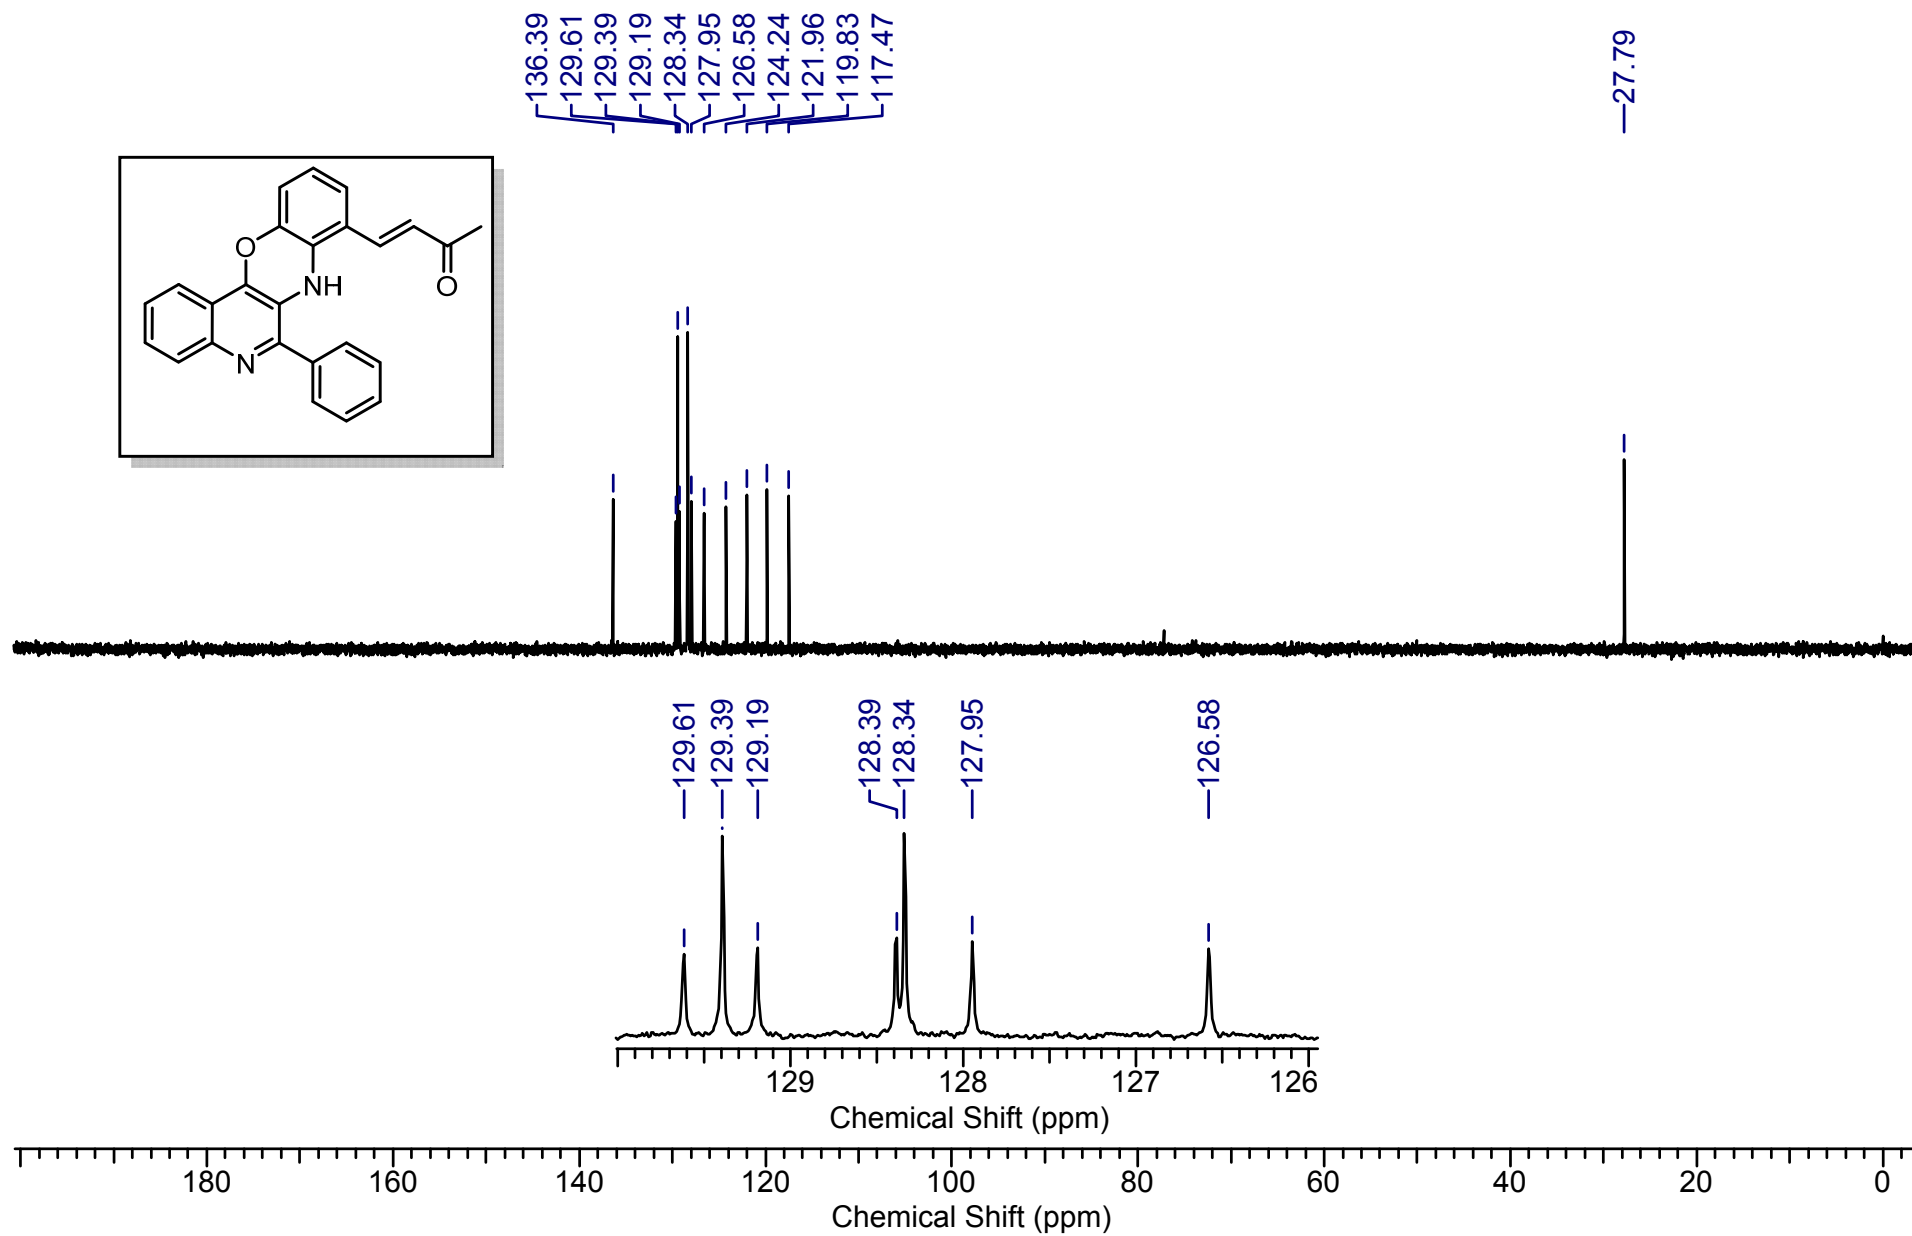

# 6

SH-684 #334 RT: 1.79 AV: 1 NL: 1.40E8  
T: FTMS + p ESI Full ms [100.0000-1500.0000]

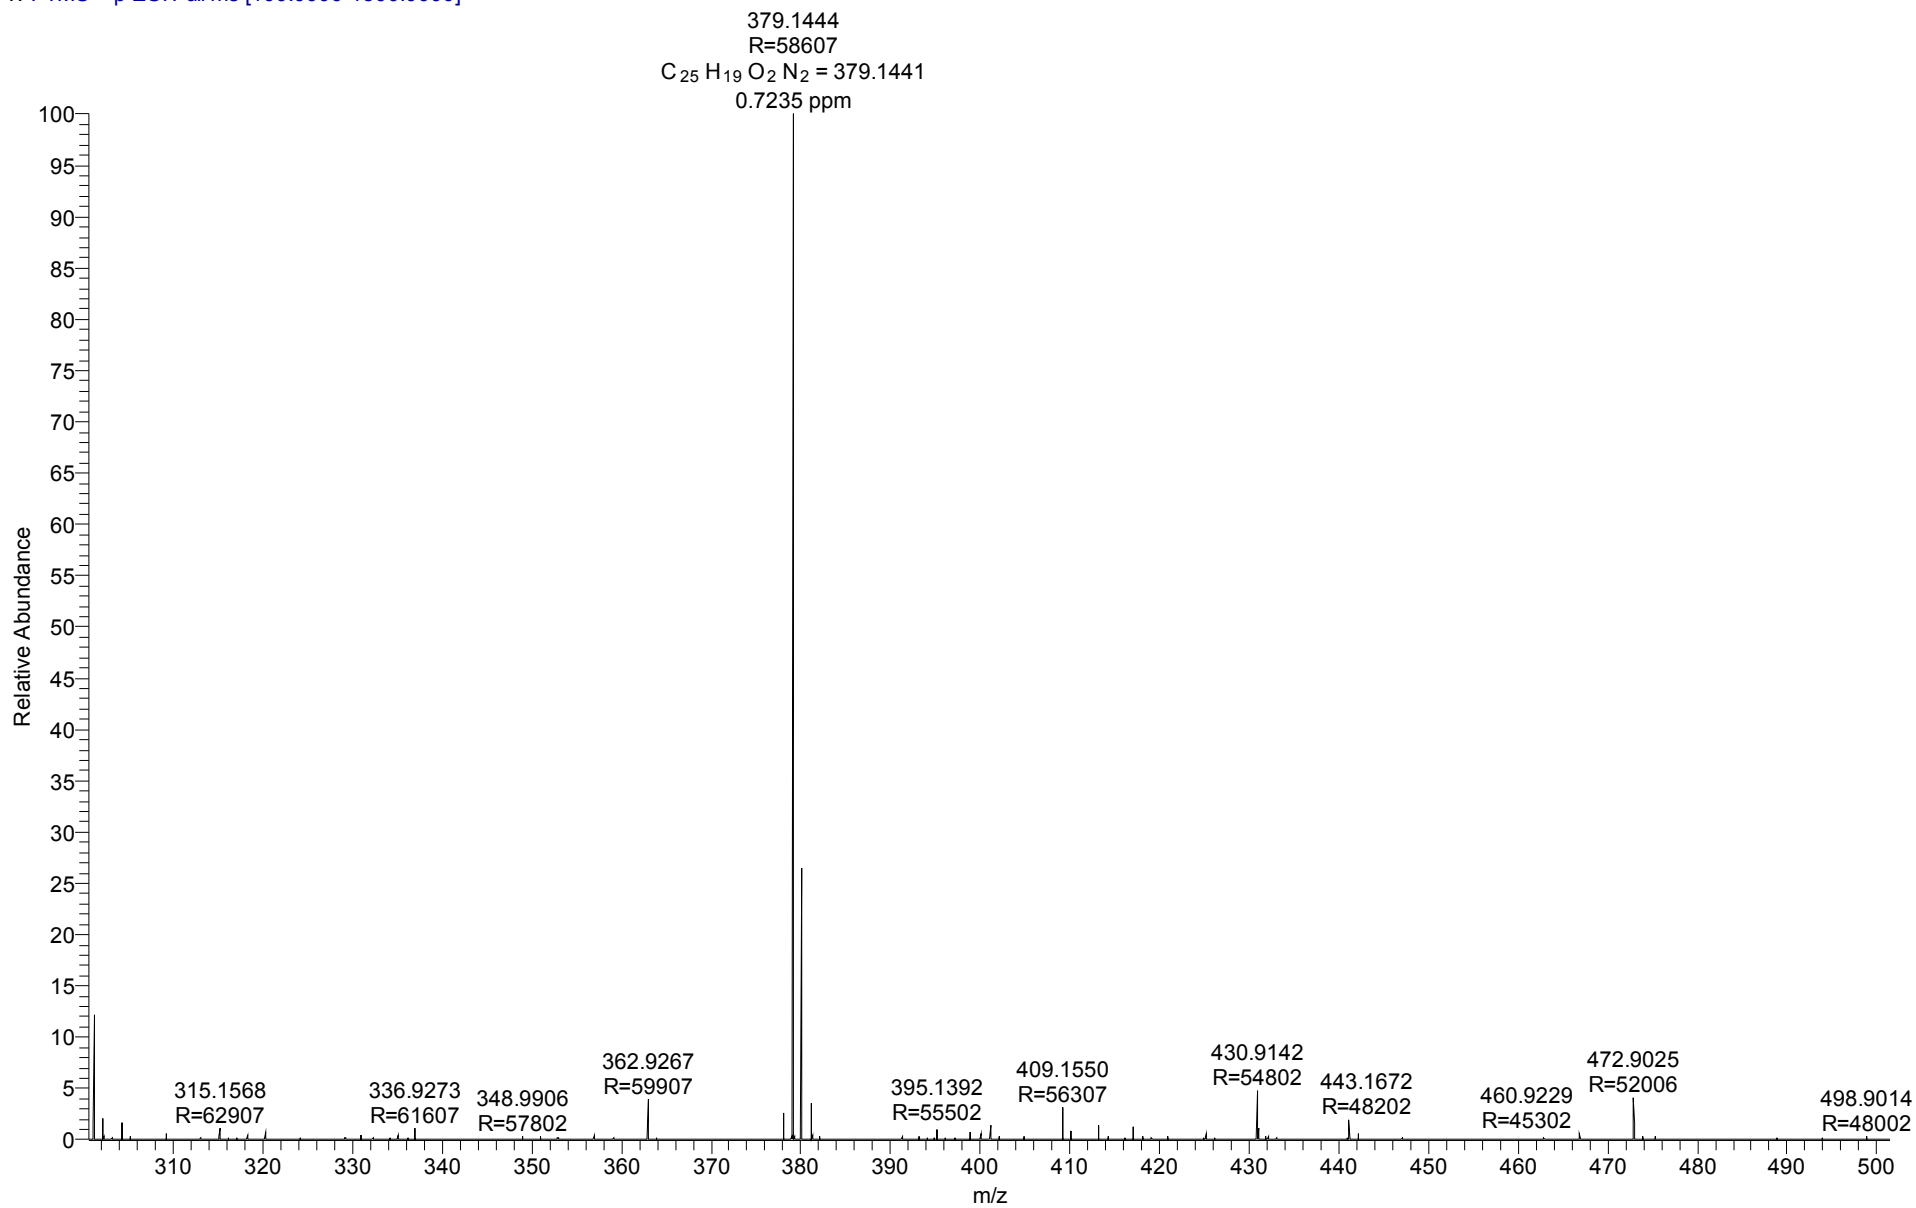

7

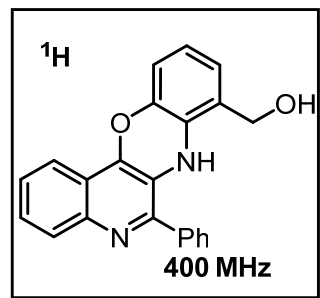

7.92  
7.89  
7.70  
7.68  
7.51  
7.49  
7.49  
7.46  
7.44  
7.44  
7.27  
6.74  
6.62  
6.60  
6.58

4.47

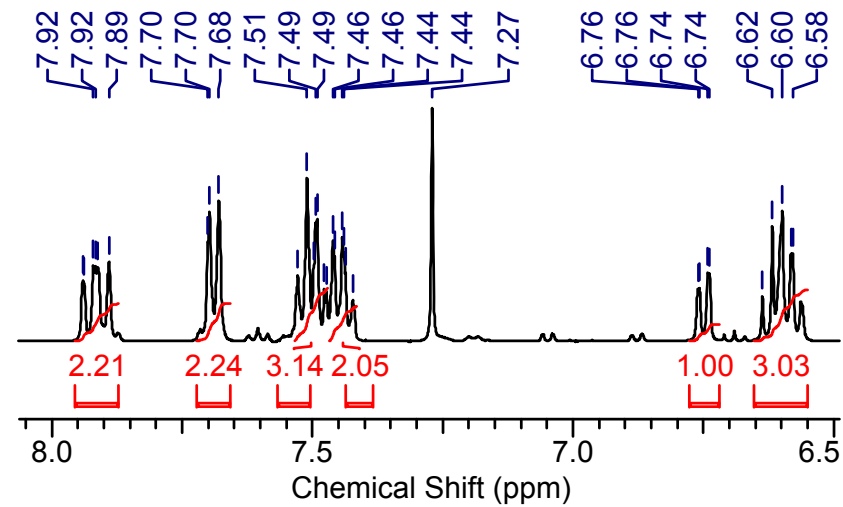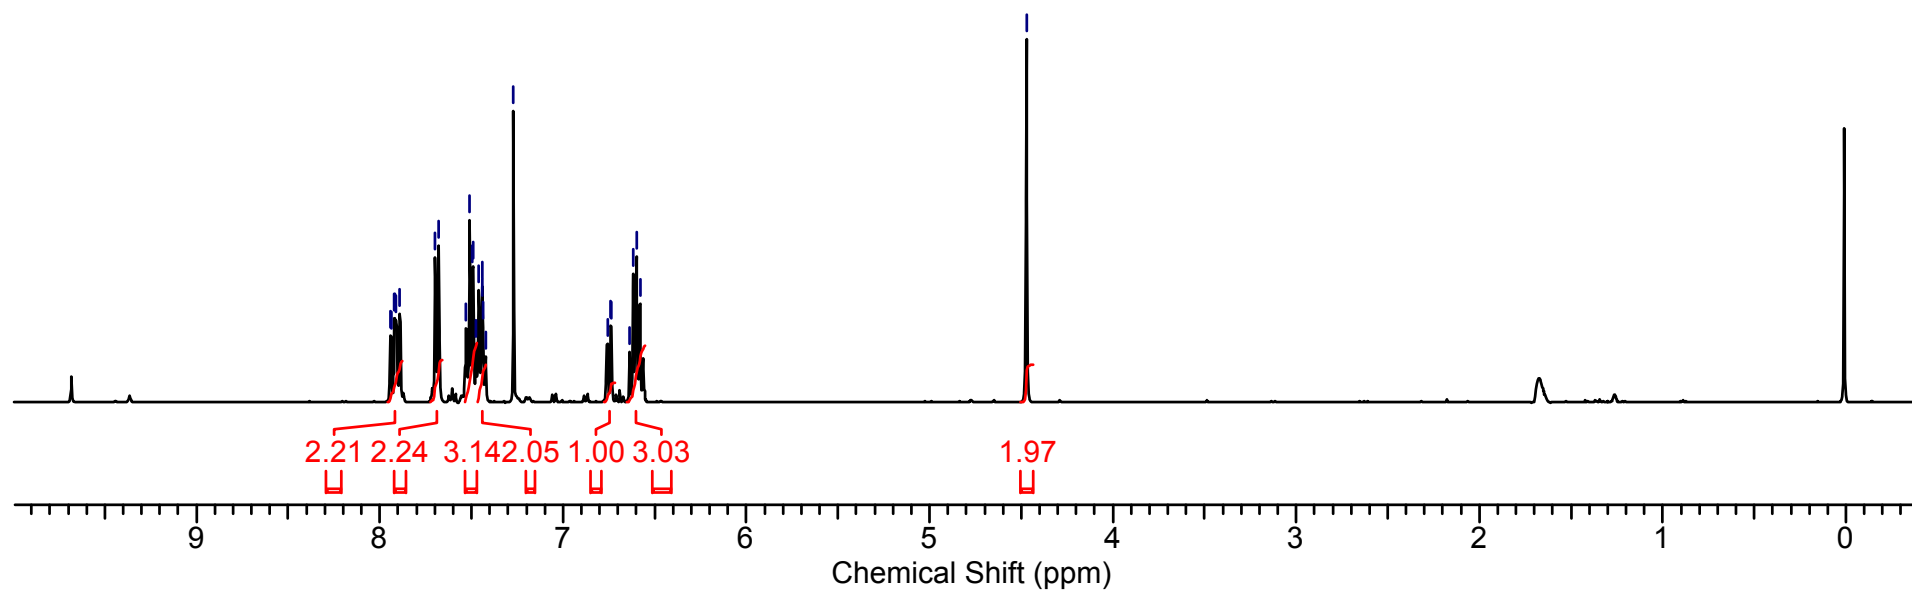

7

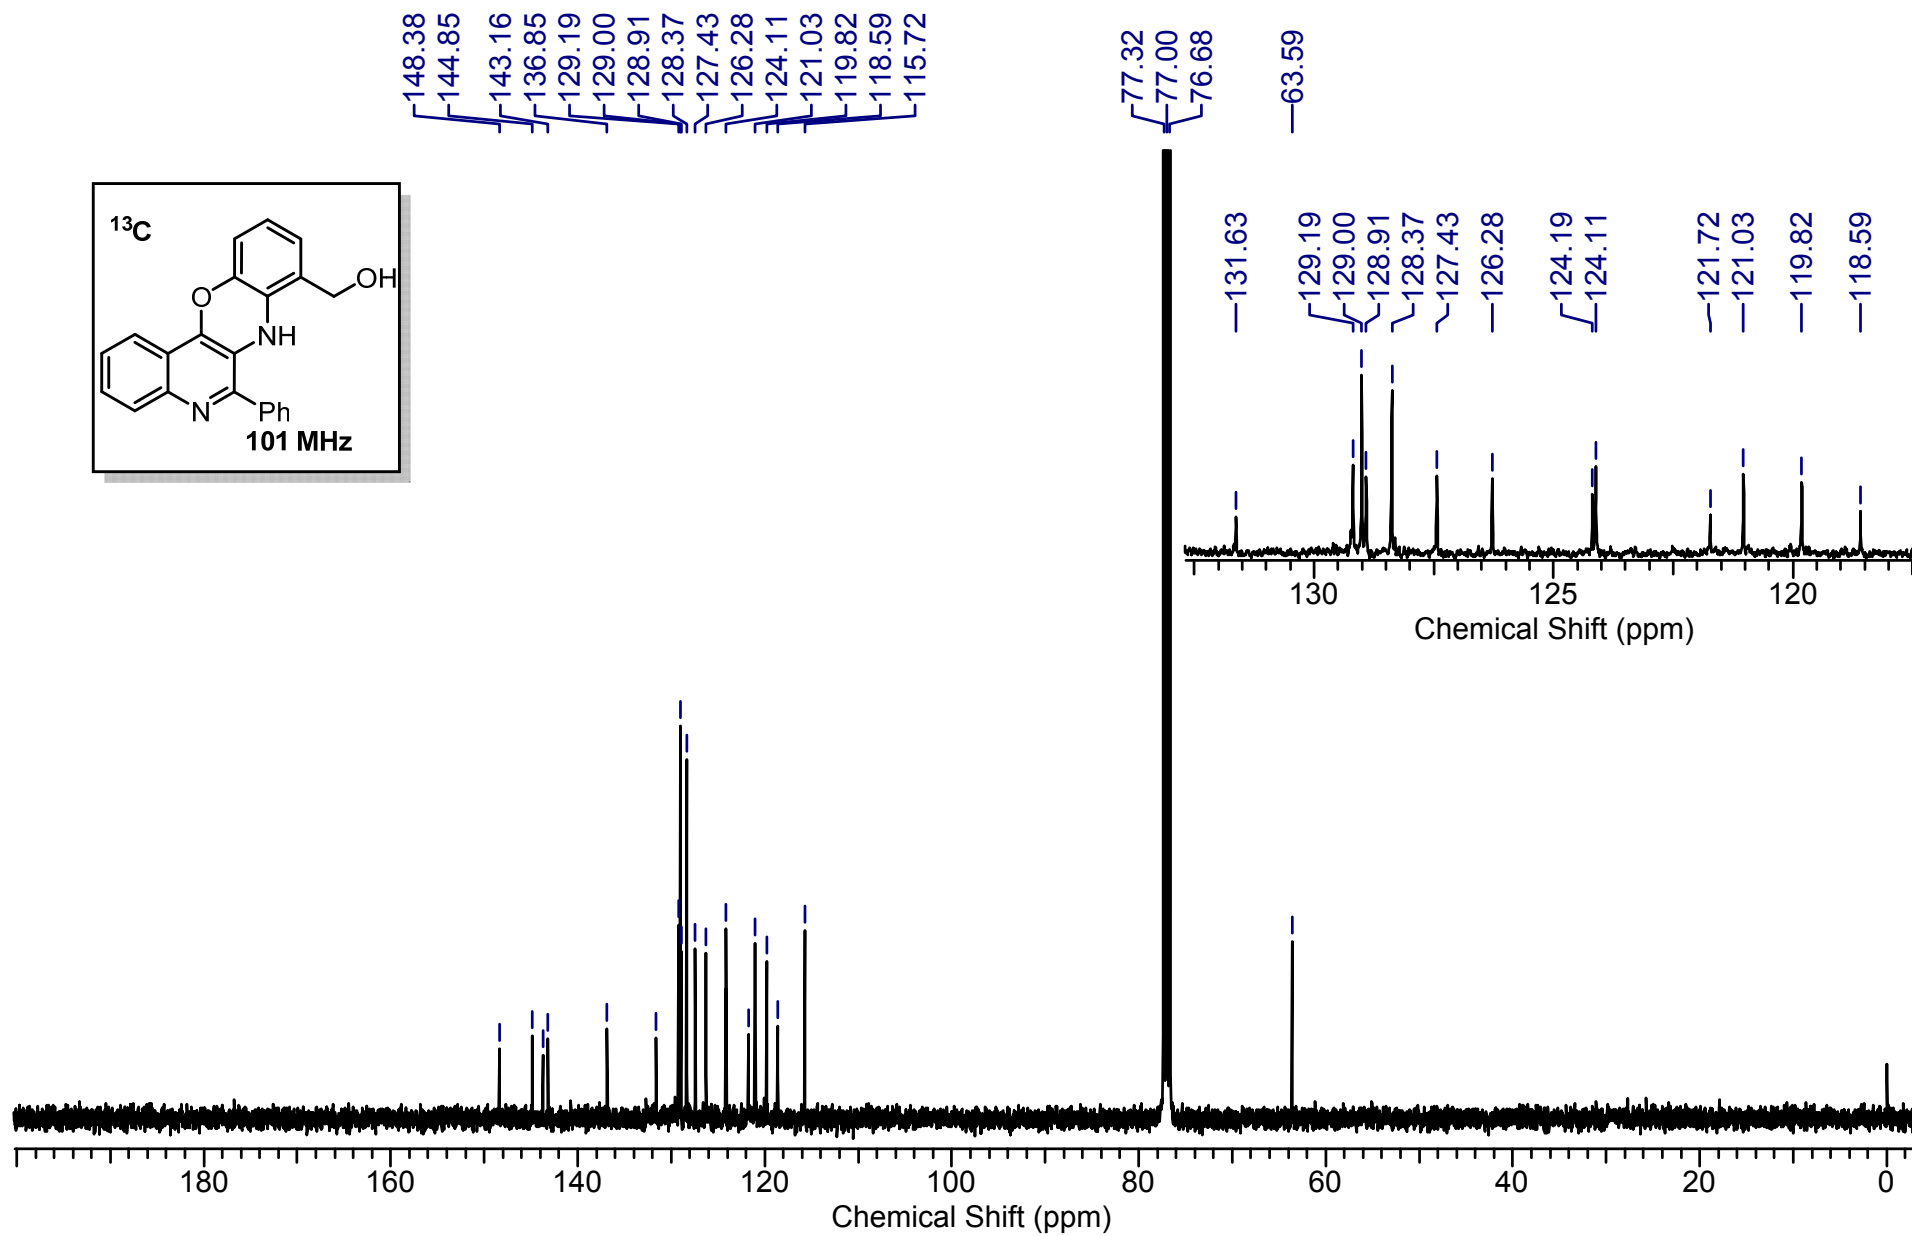

7

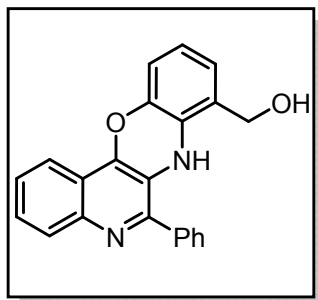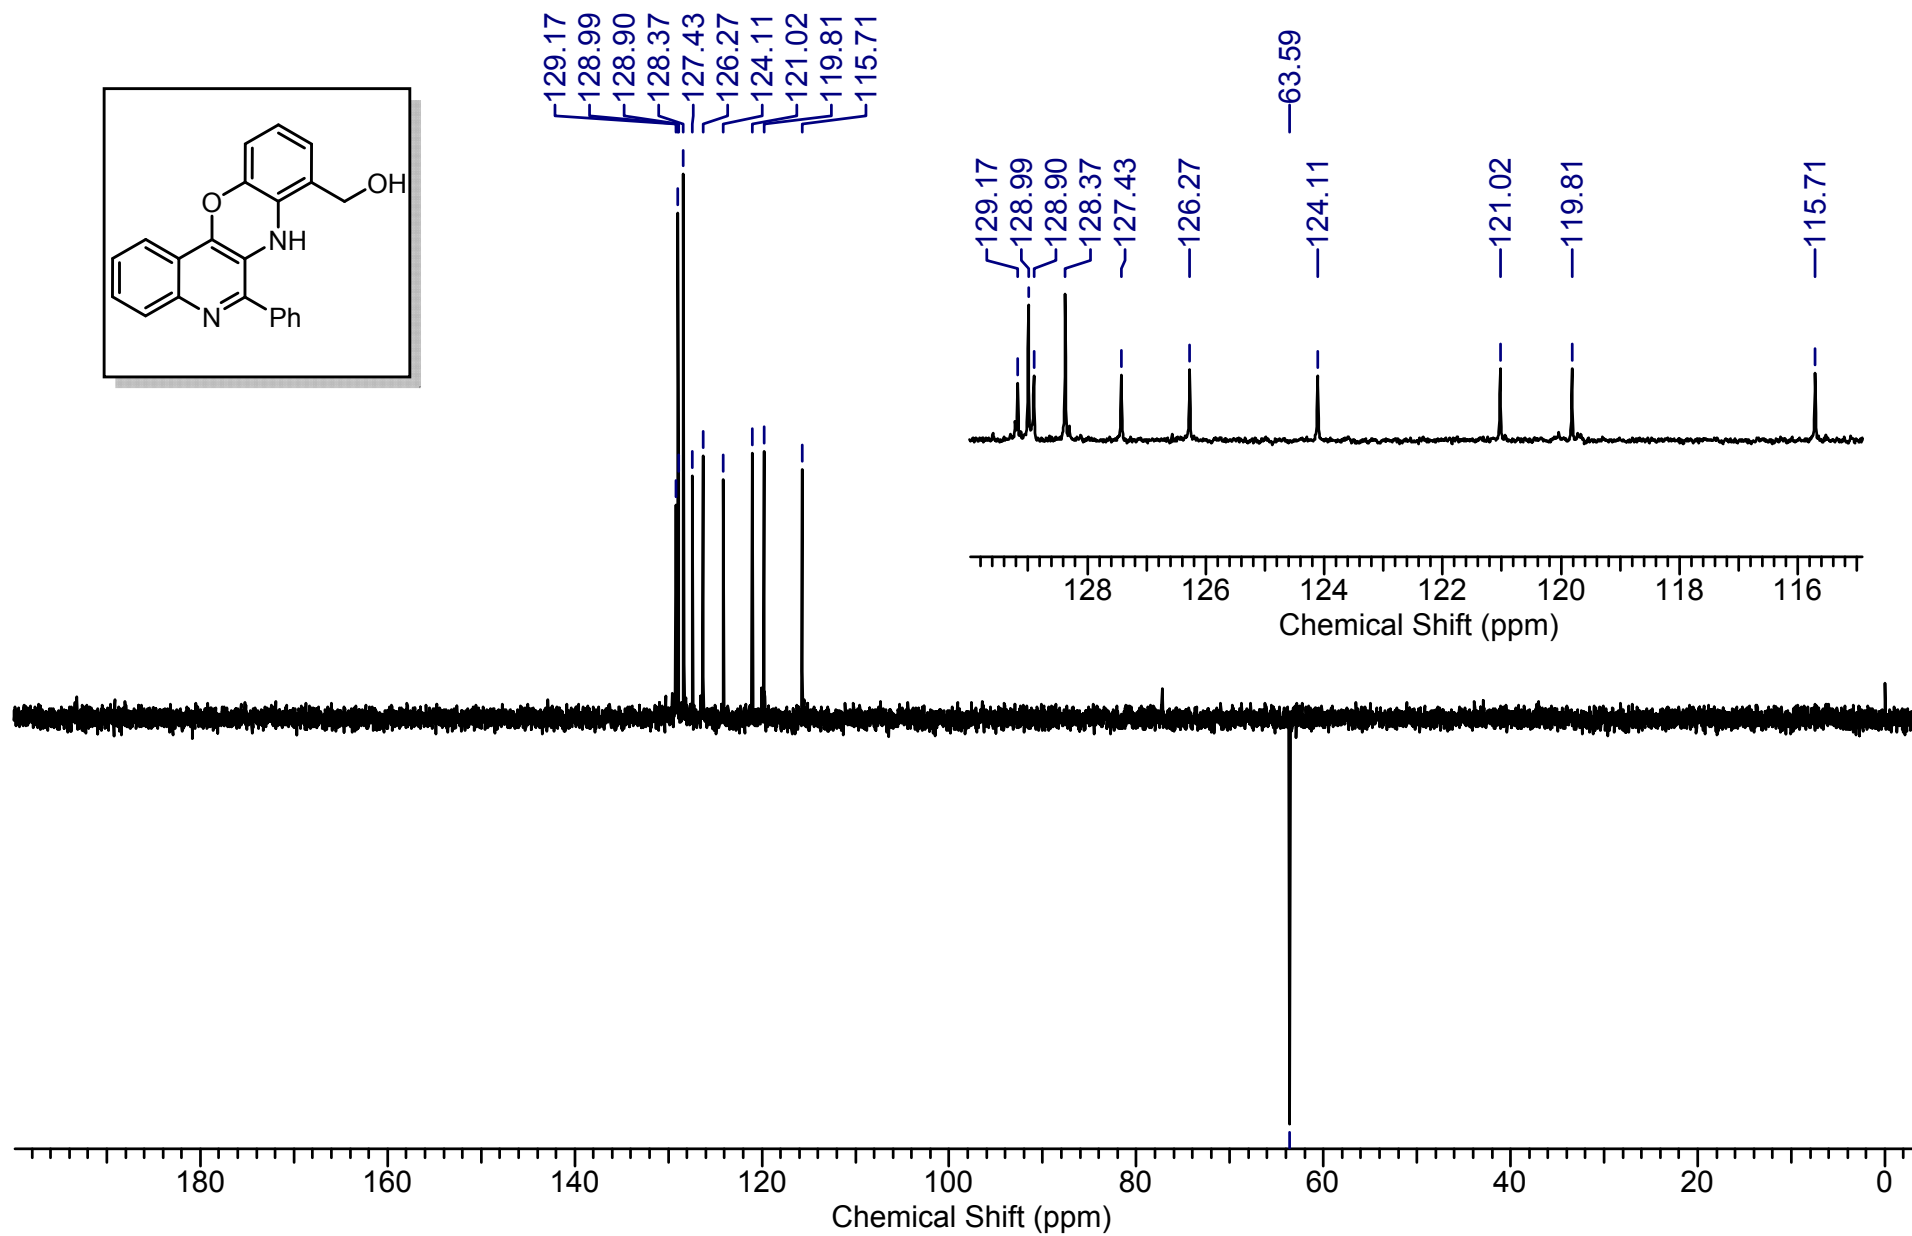

7

SH-701 #268 RT: 1.44 AV: 1 NL: 1.46E8  
T: FTMS + p ESI Full ms [100.0000-1500.0000]

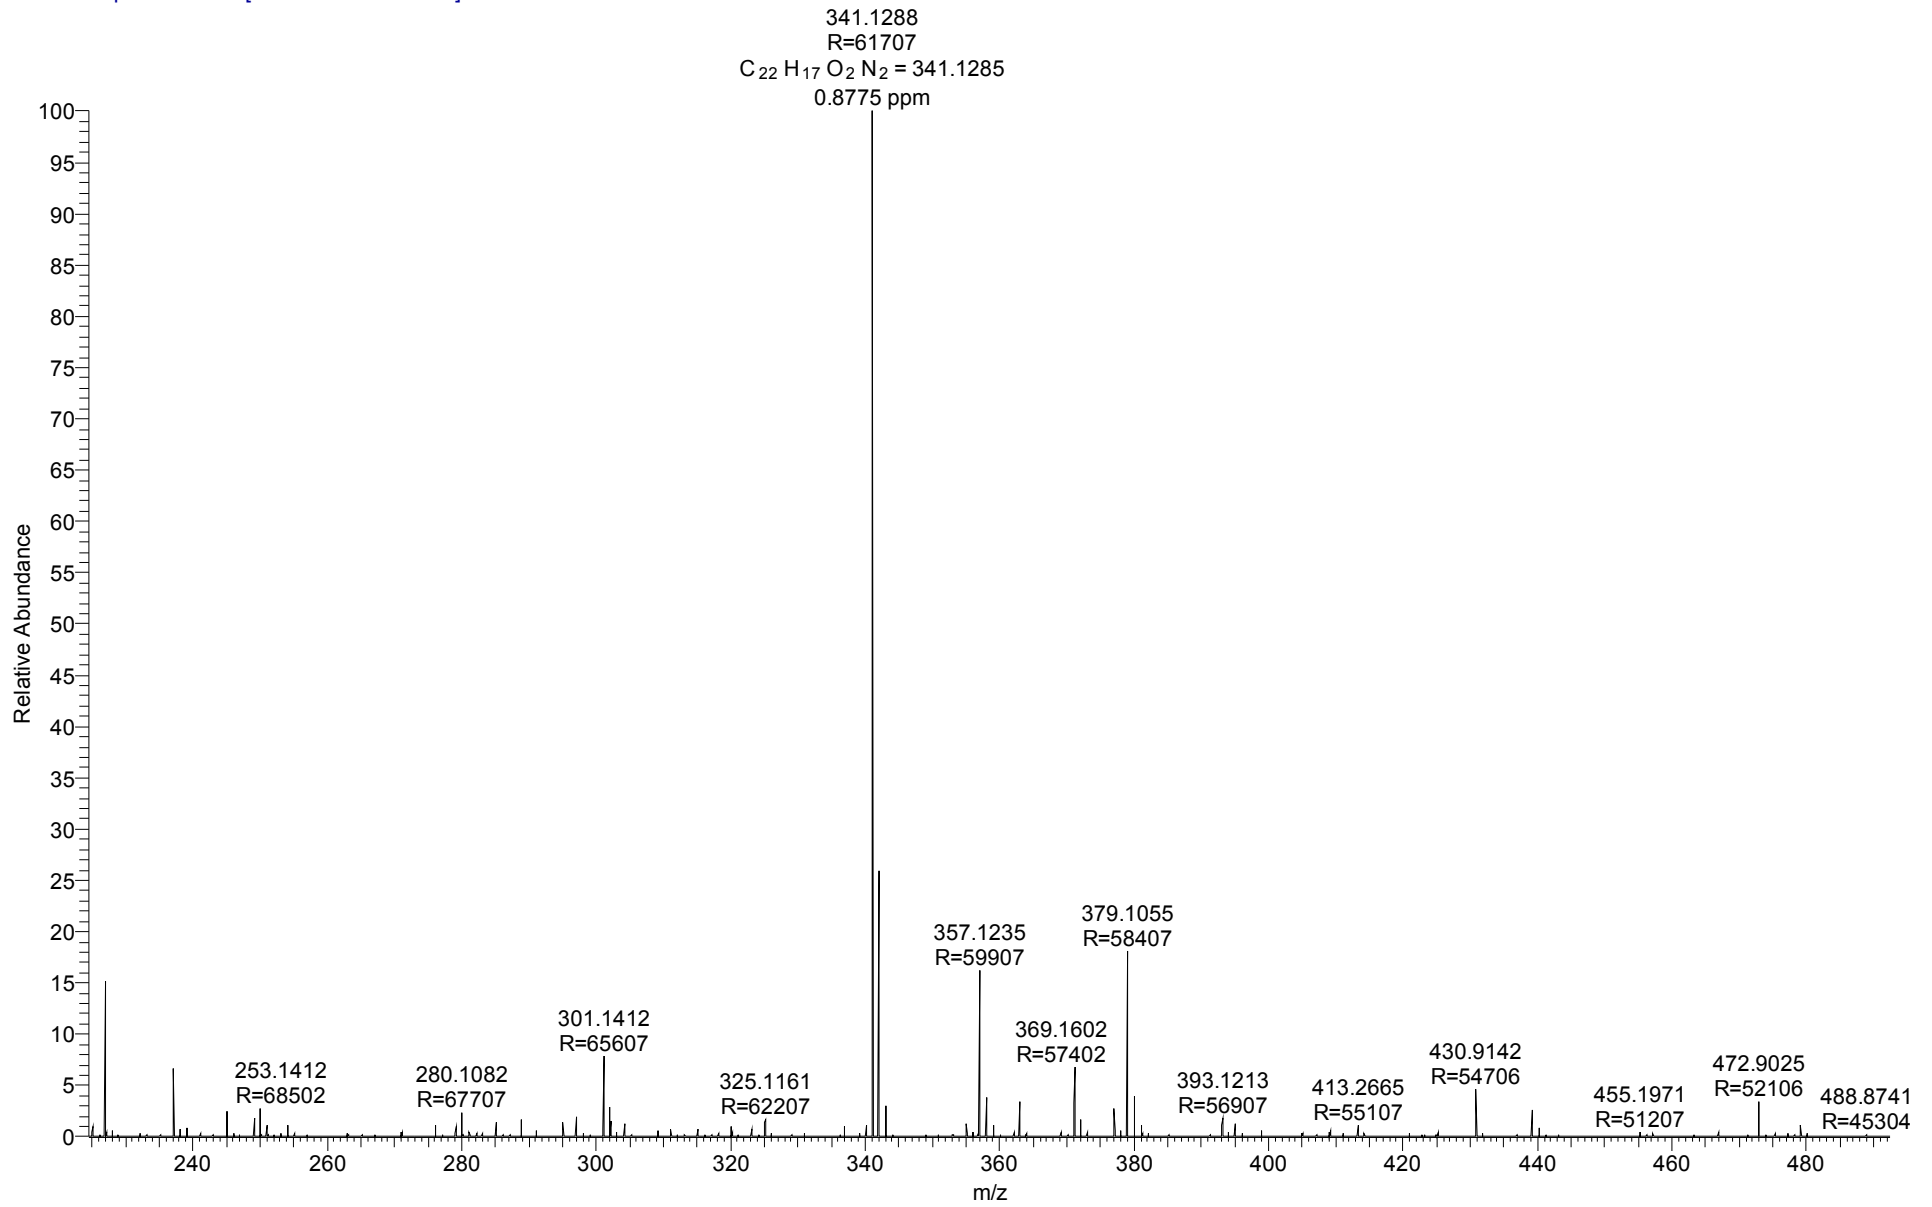

8

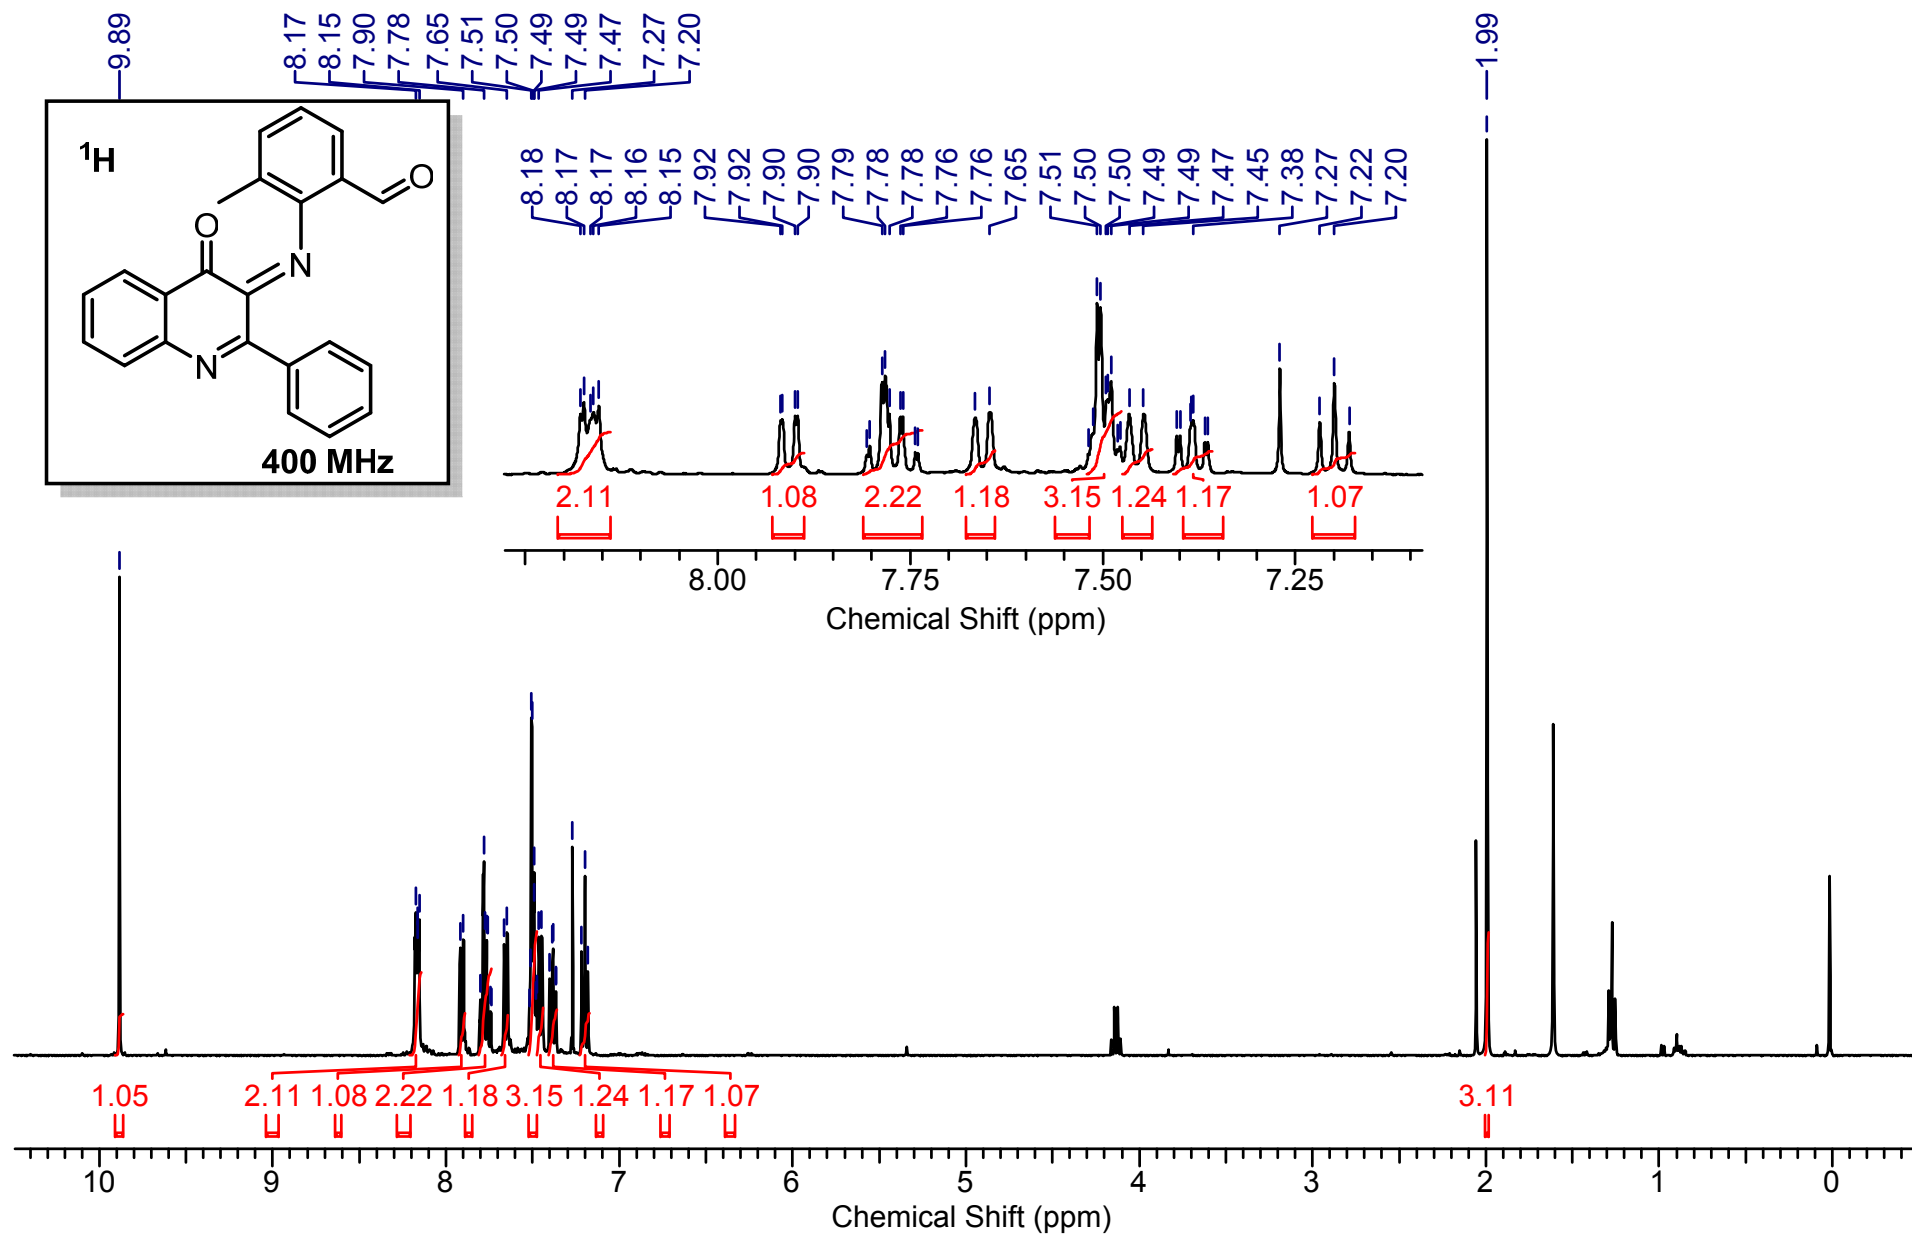

8

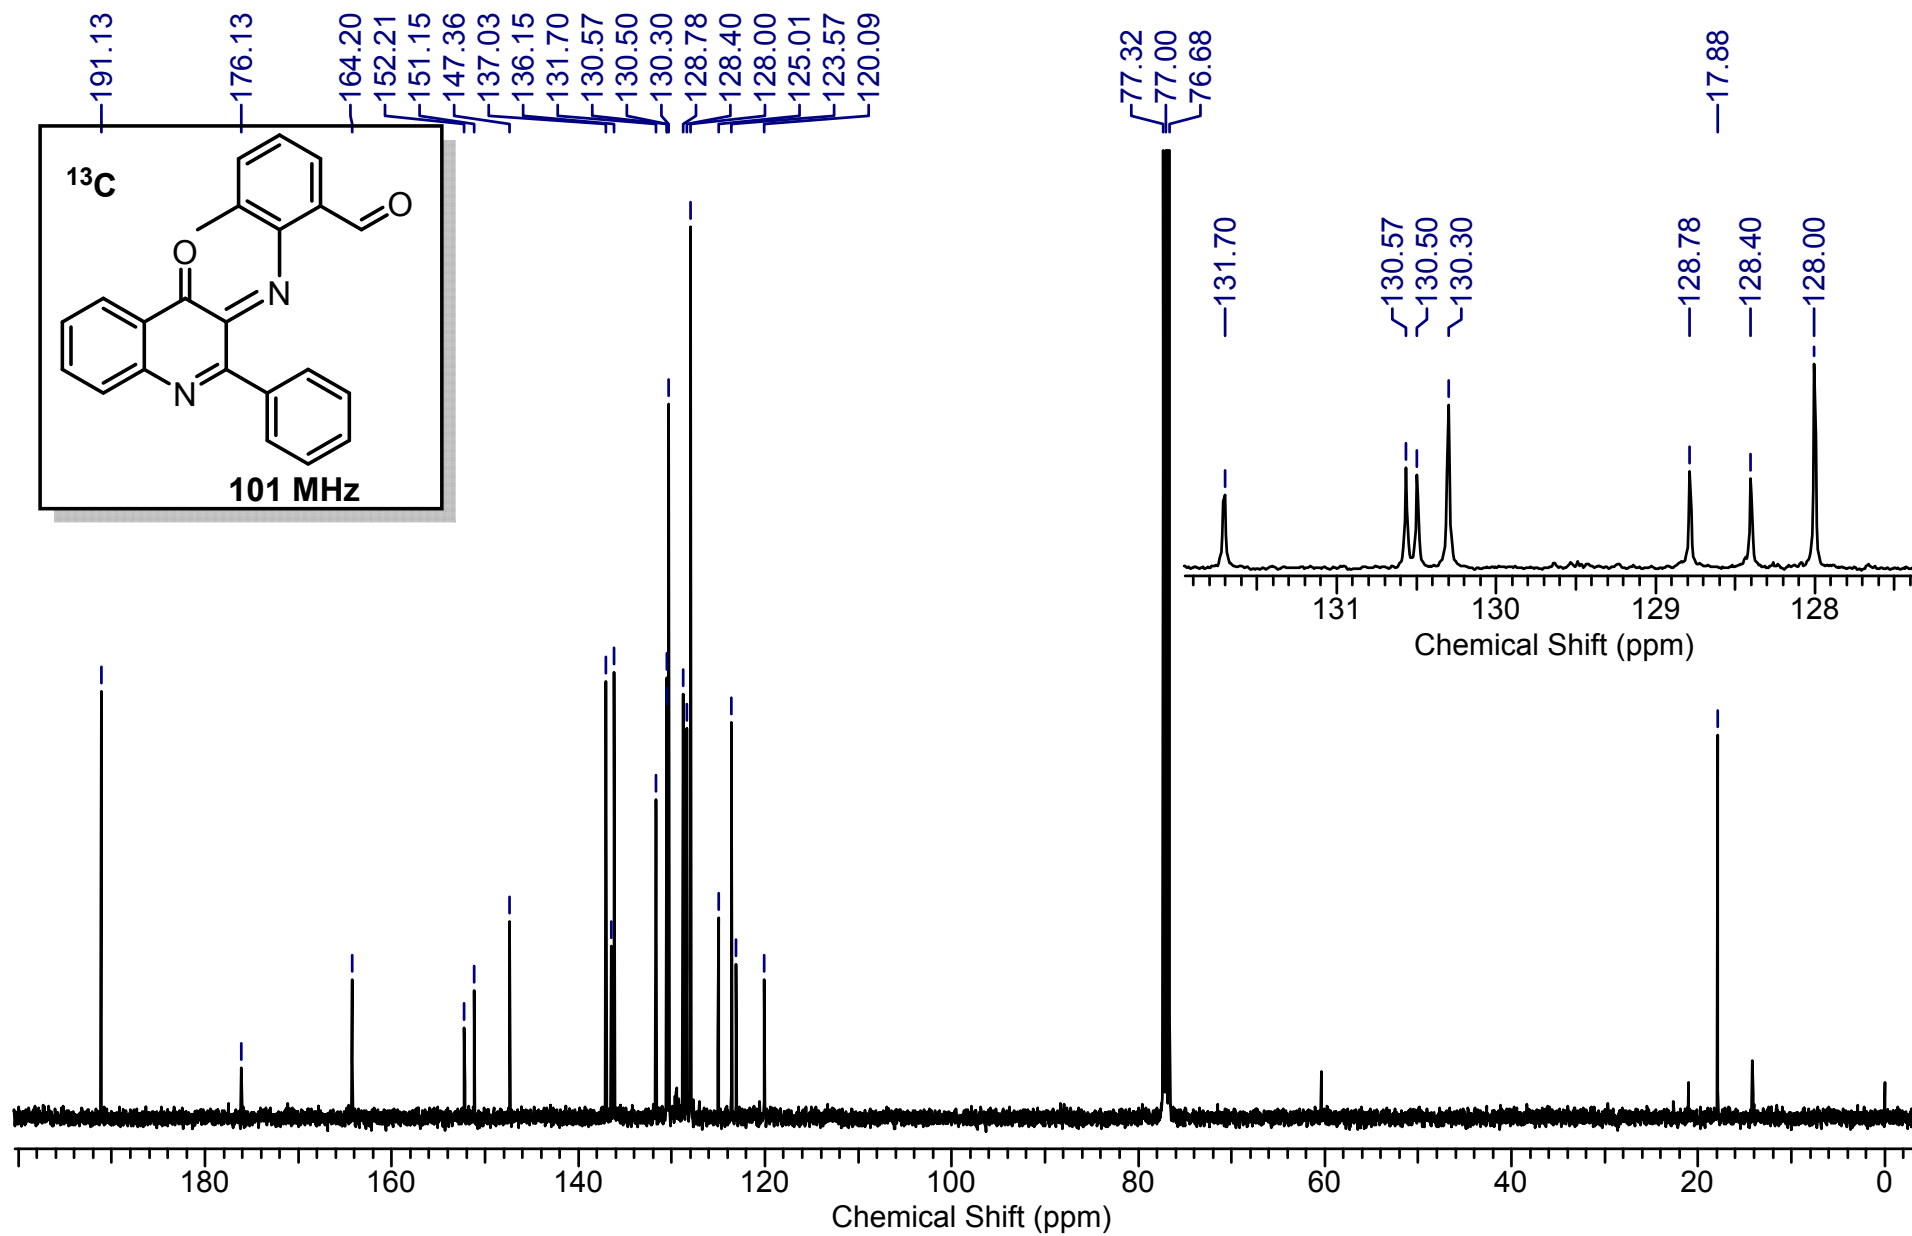



8

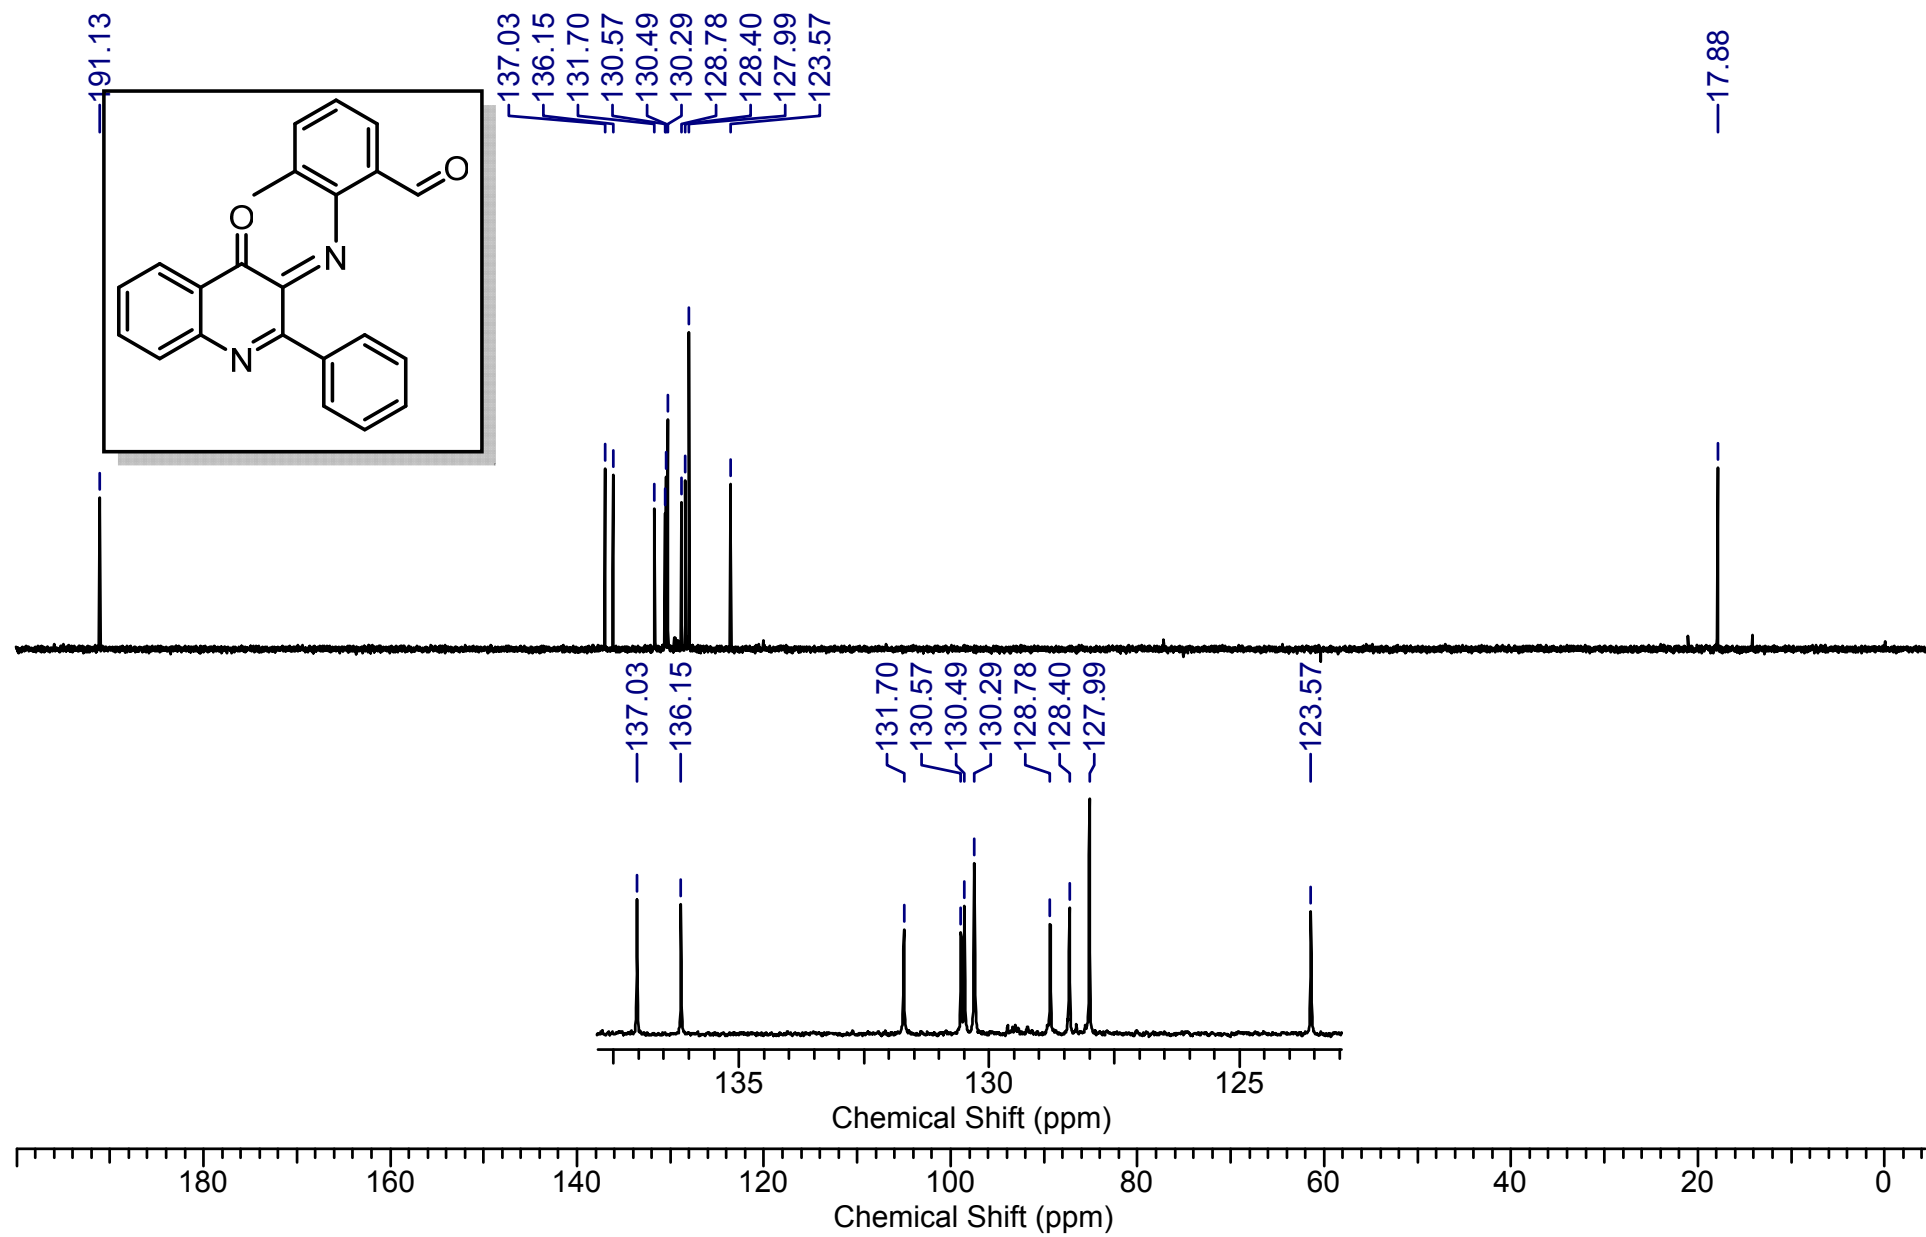

# 8

SVH-840 #530 RT: 2.86 AV: 1 NL: 1.87E7  
T: FTMS + p ESI Full ms [100.0000-1500.0000]

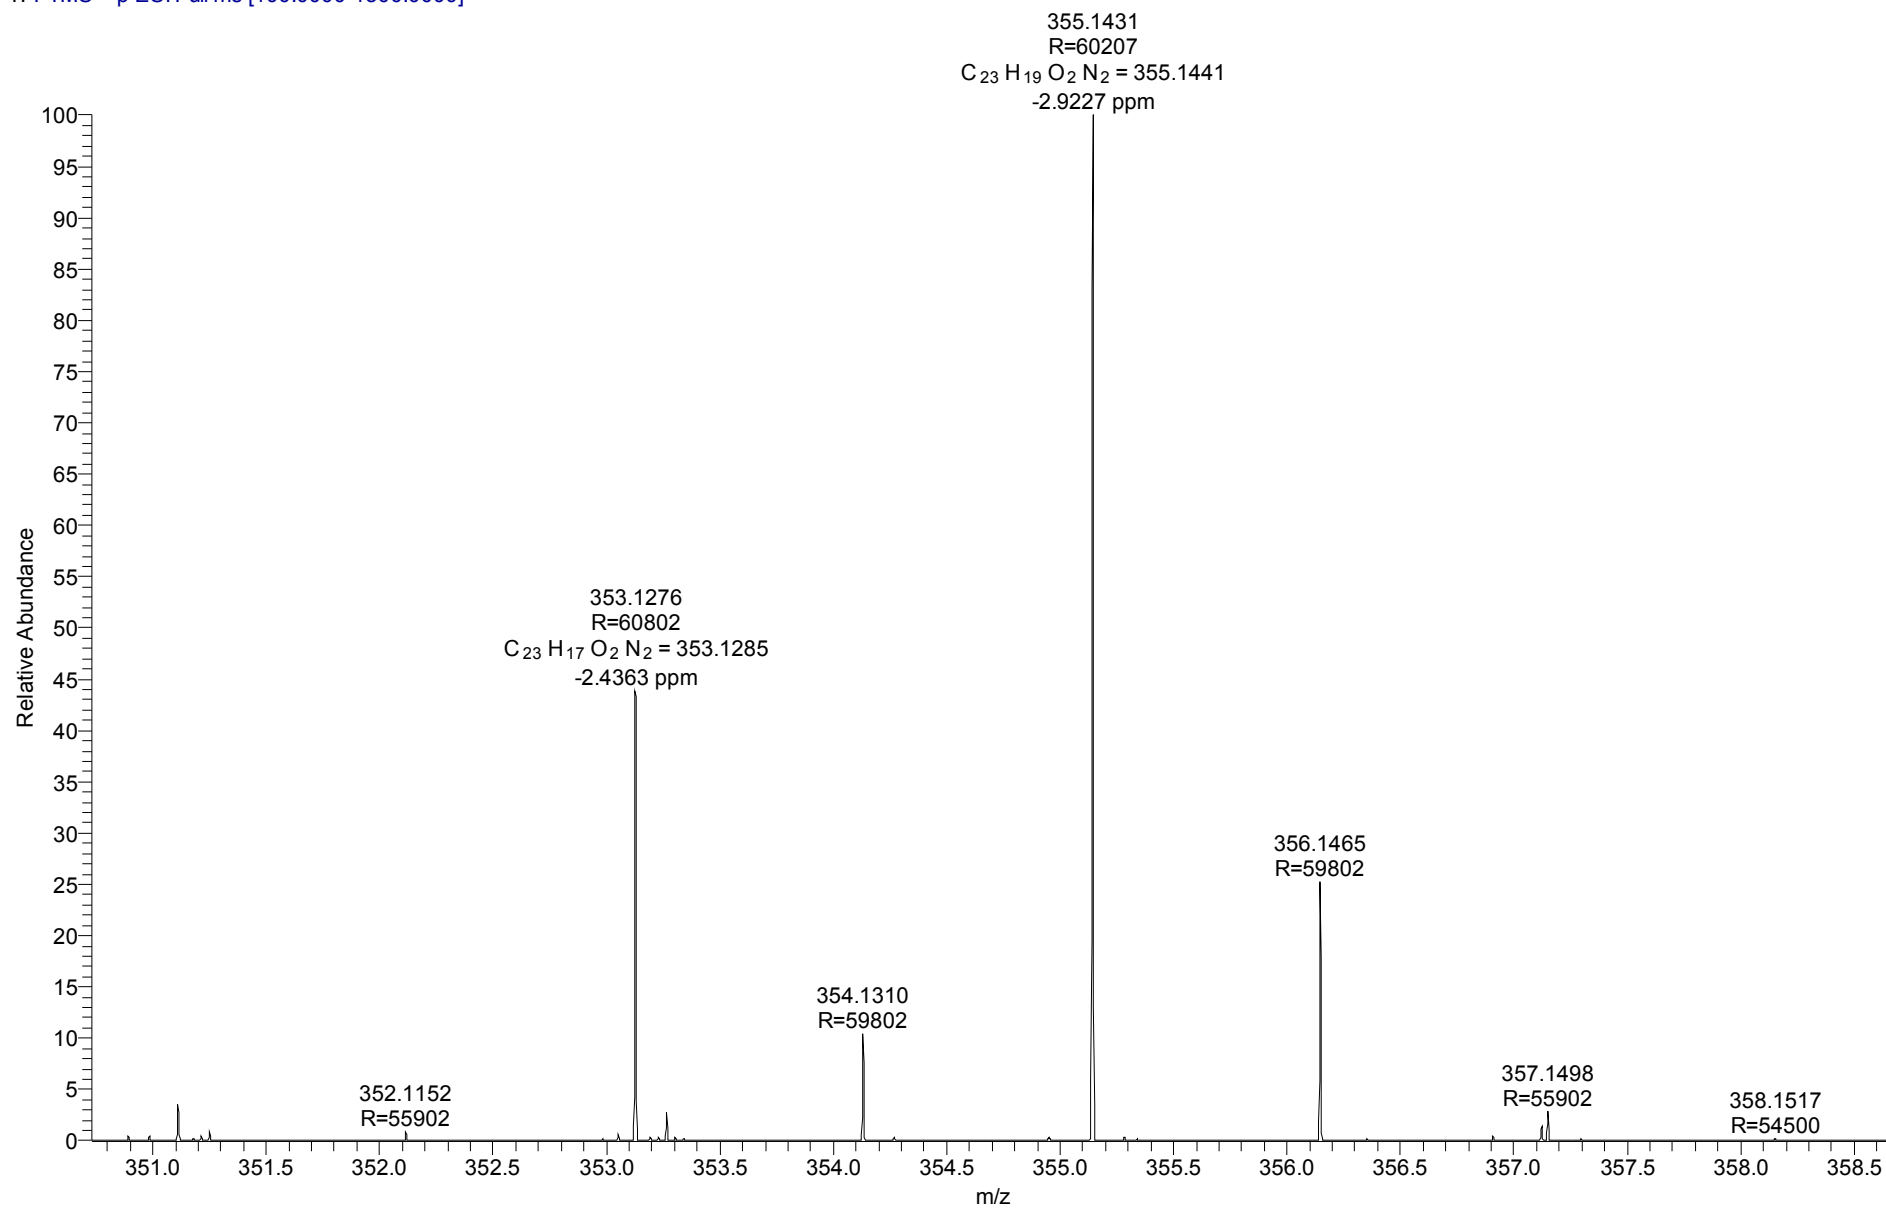

10

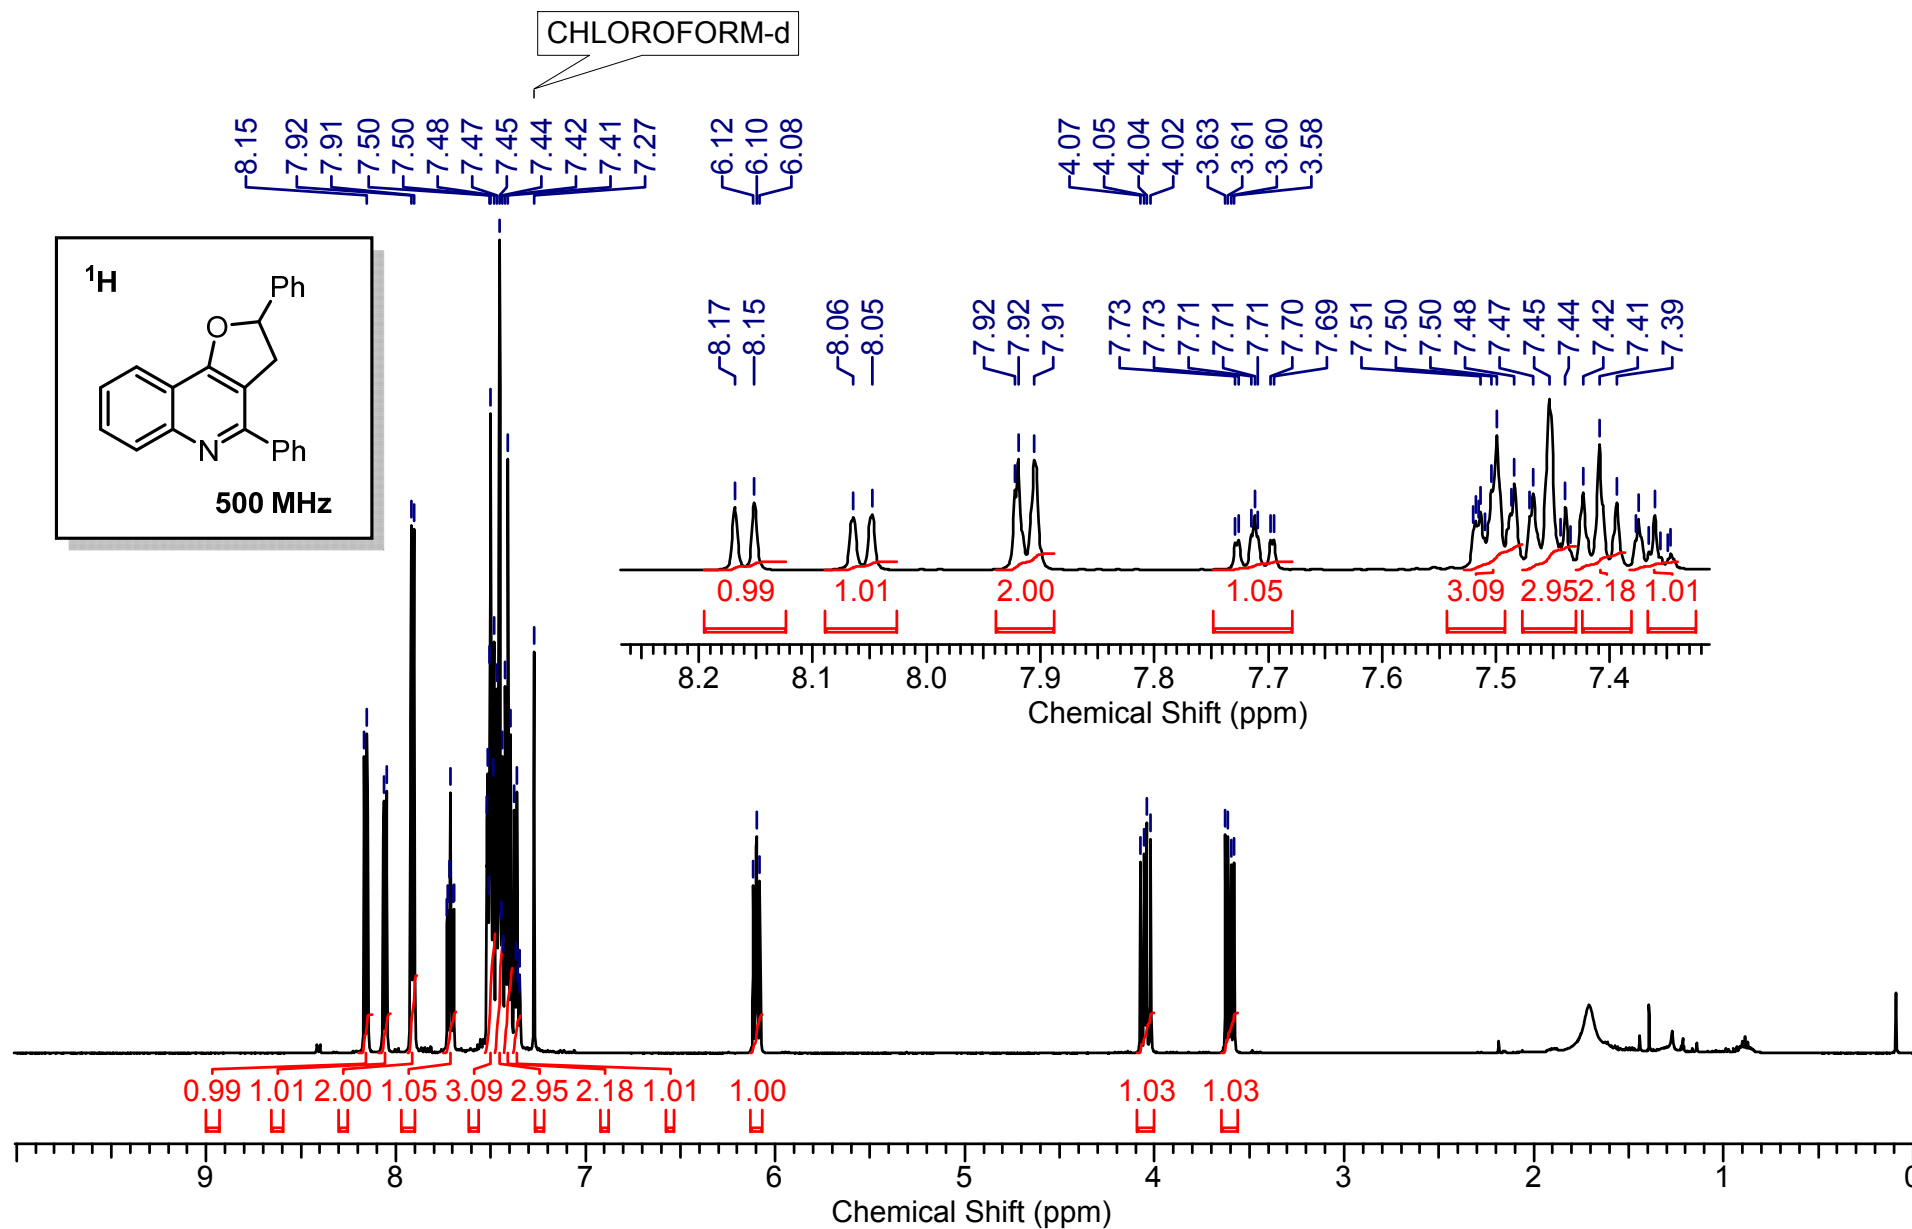

10

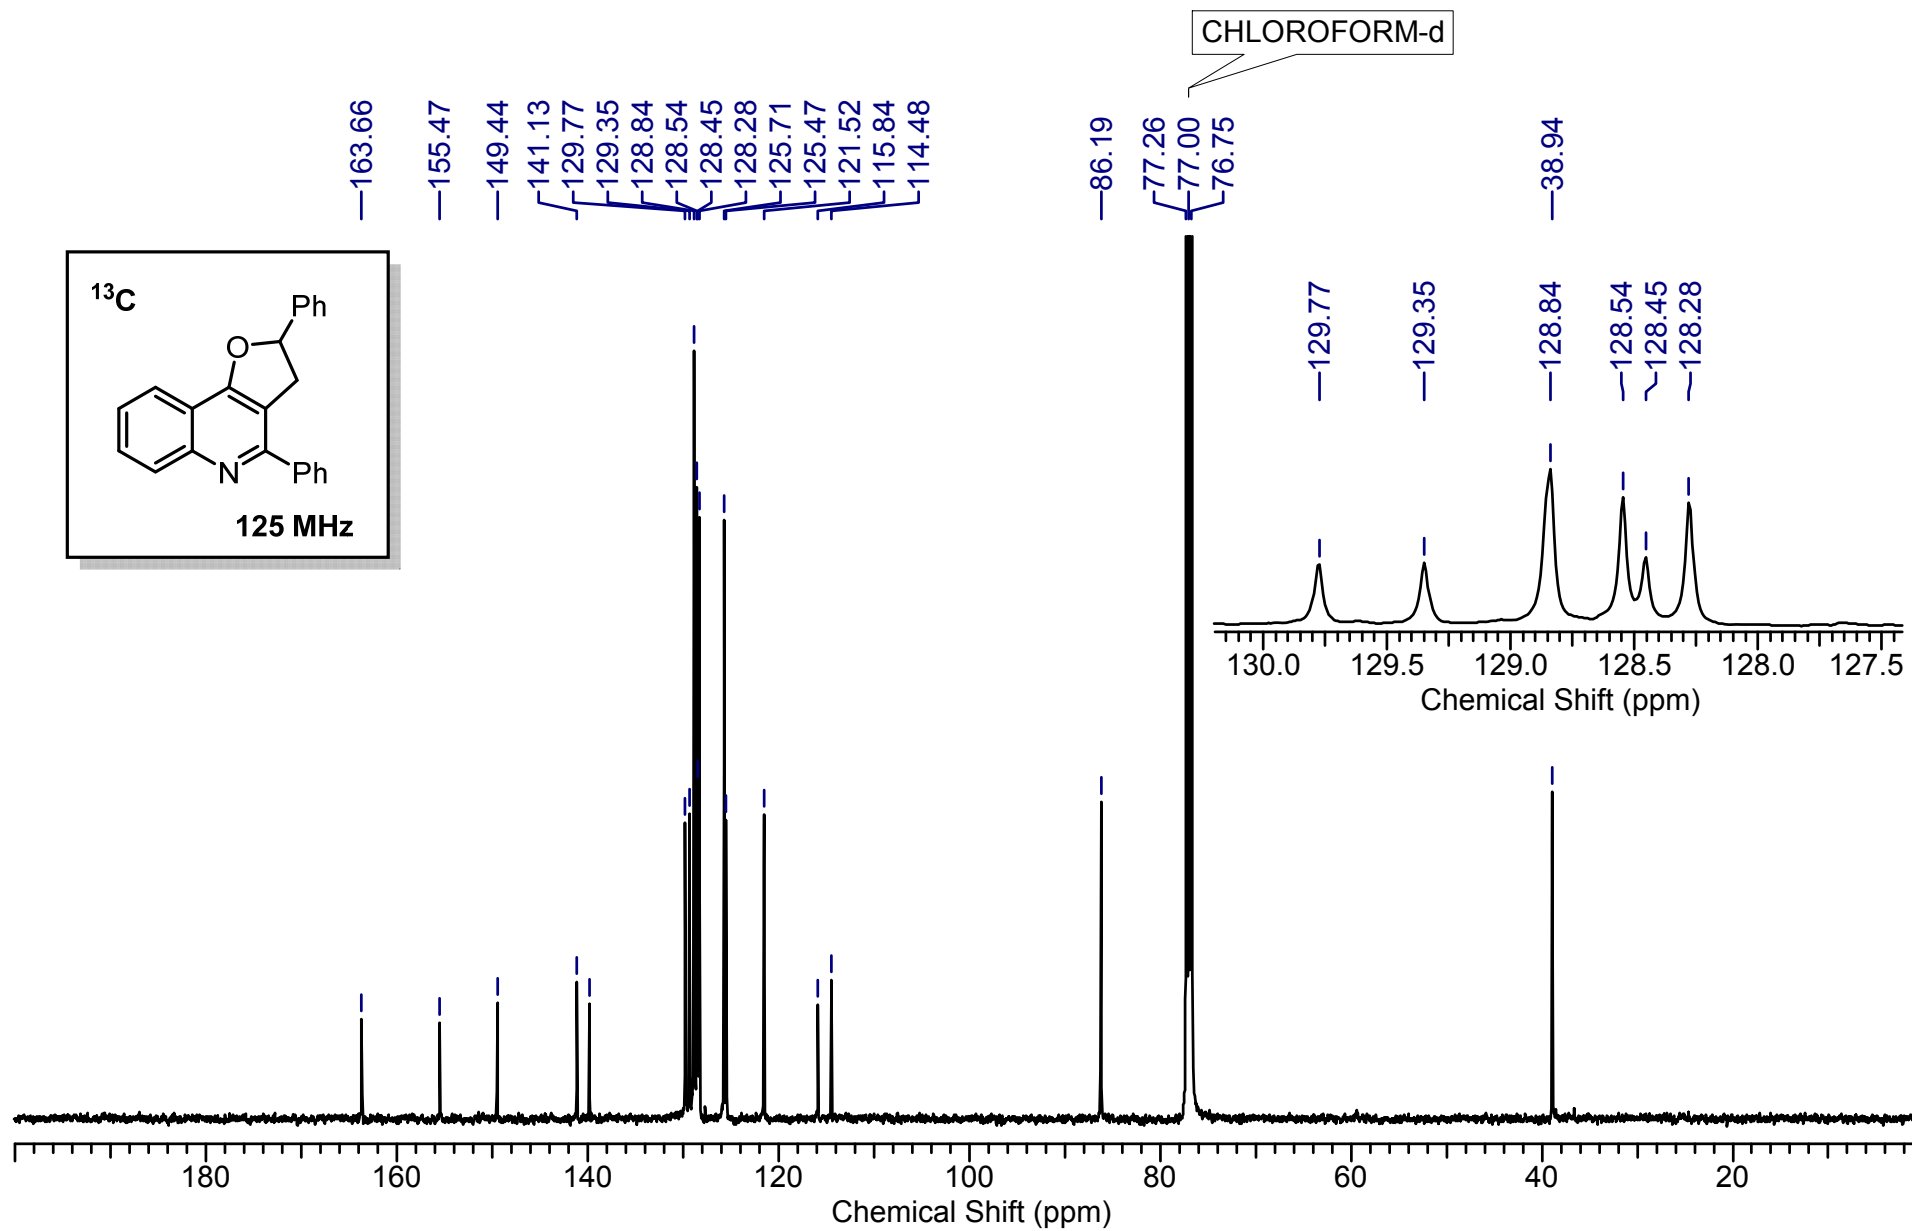

10

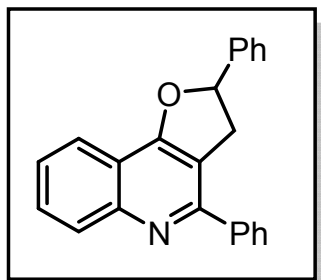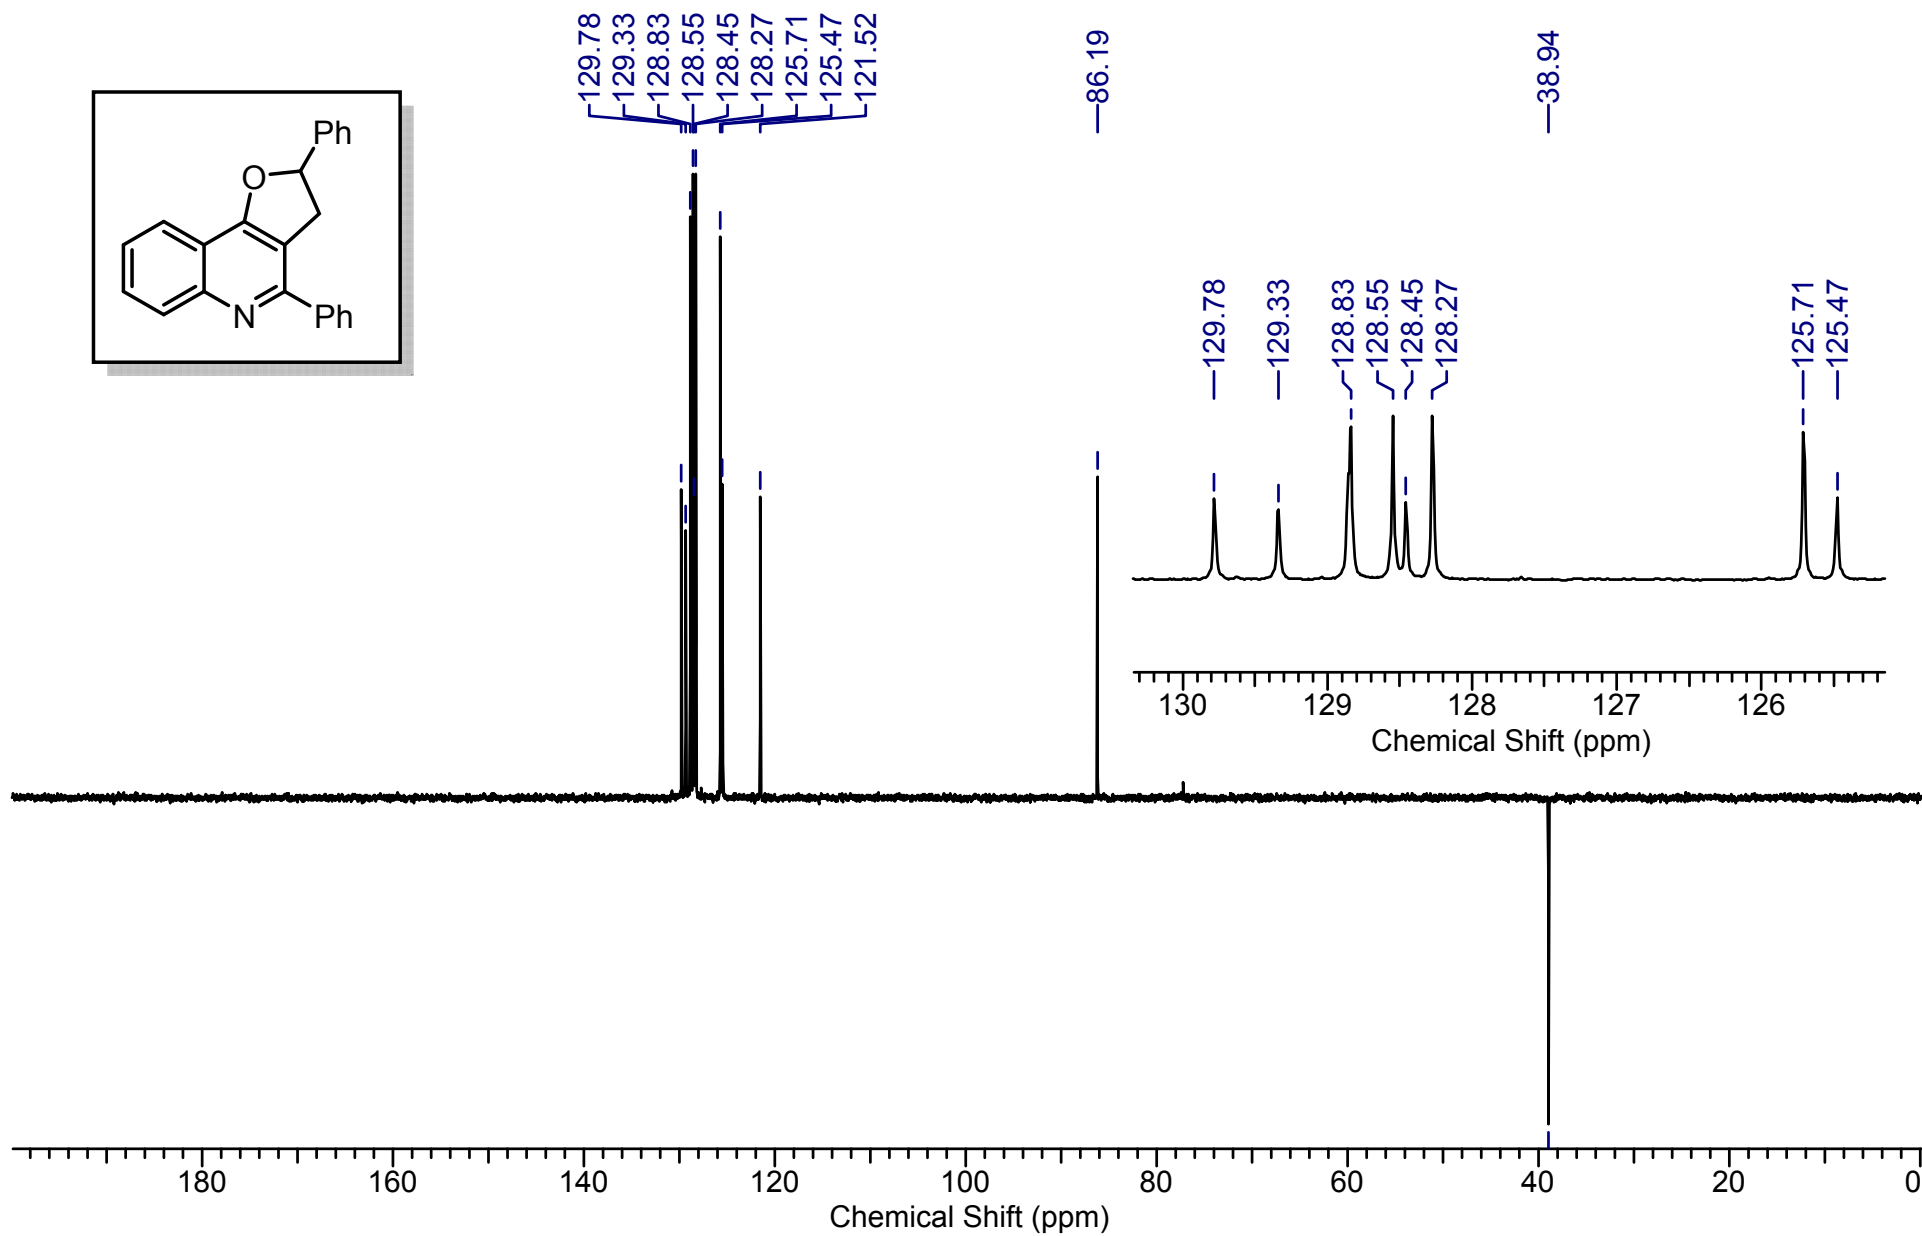

10

NK 1

IISER PUNE

NK 1 87 (1.599) AM2 (Ar,20000.0,556.28,0.00,LS 3); Sm (SG, 3x1.00)

1: TOF MS ES+  
4.44e6

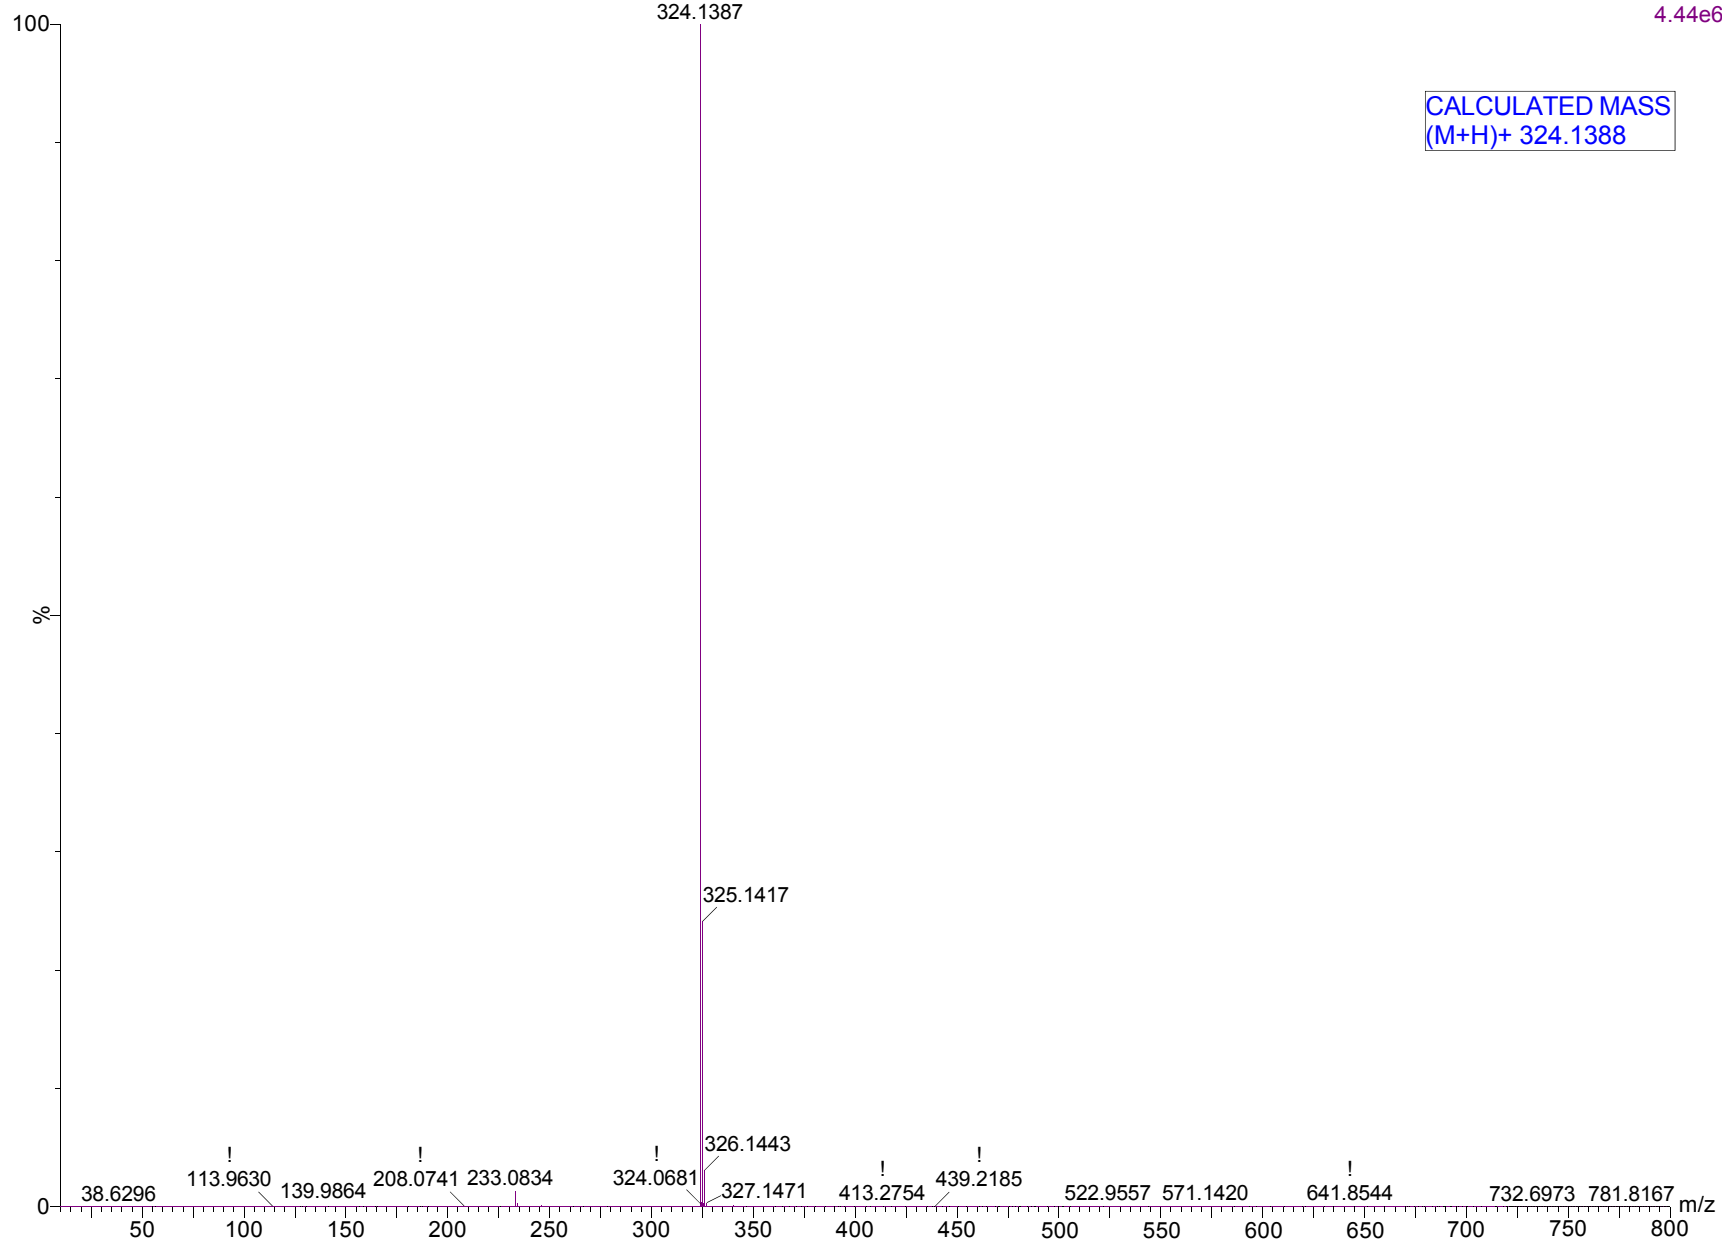

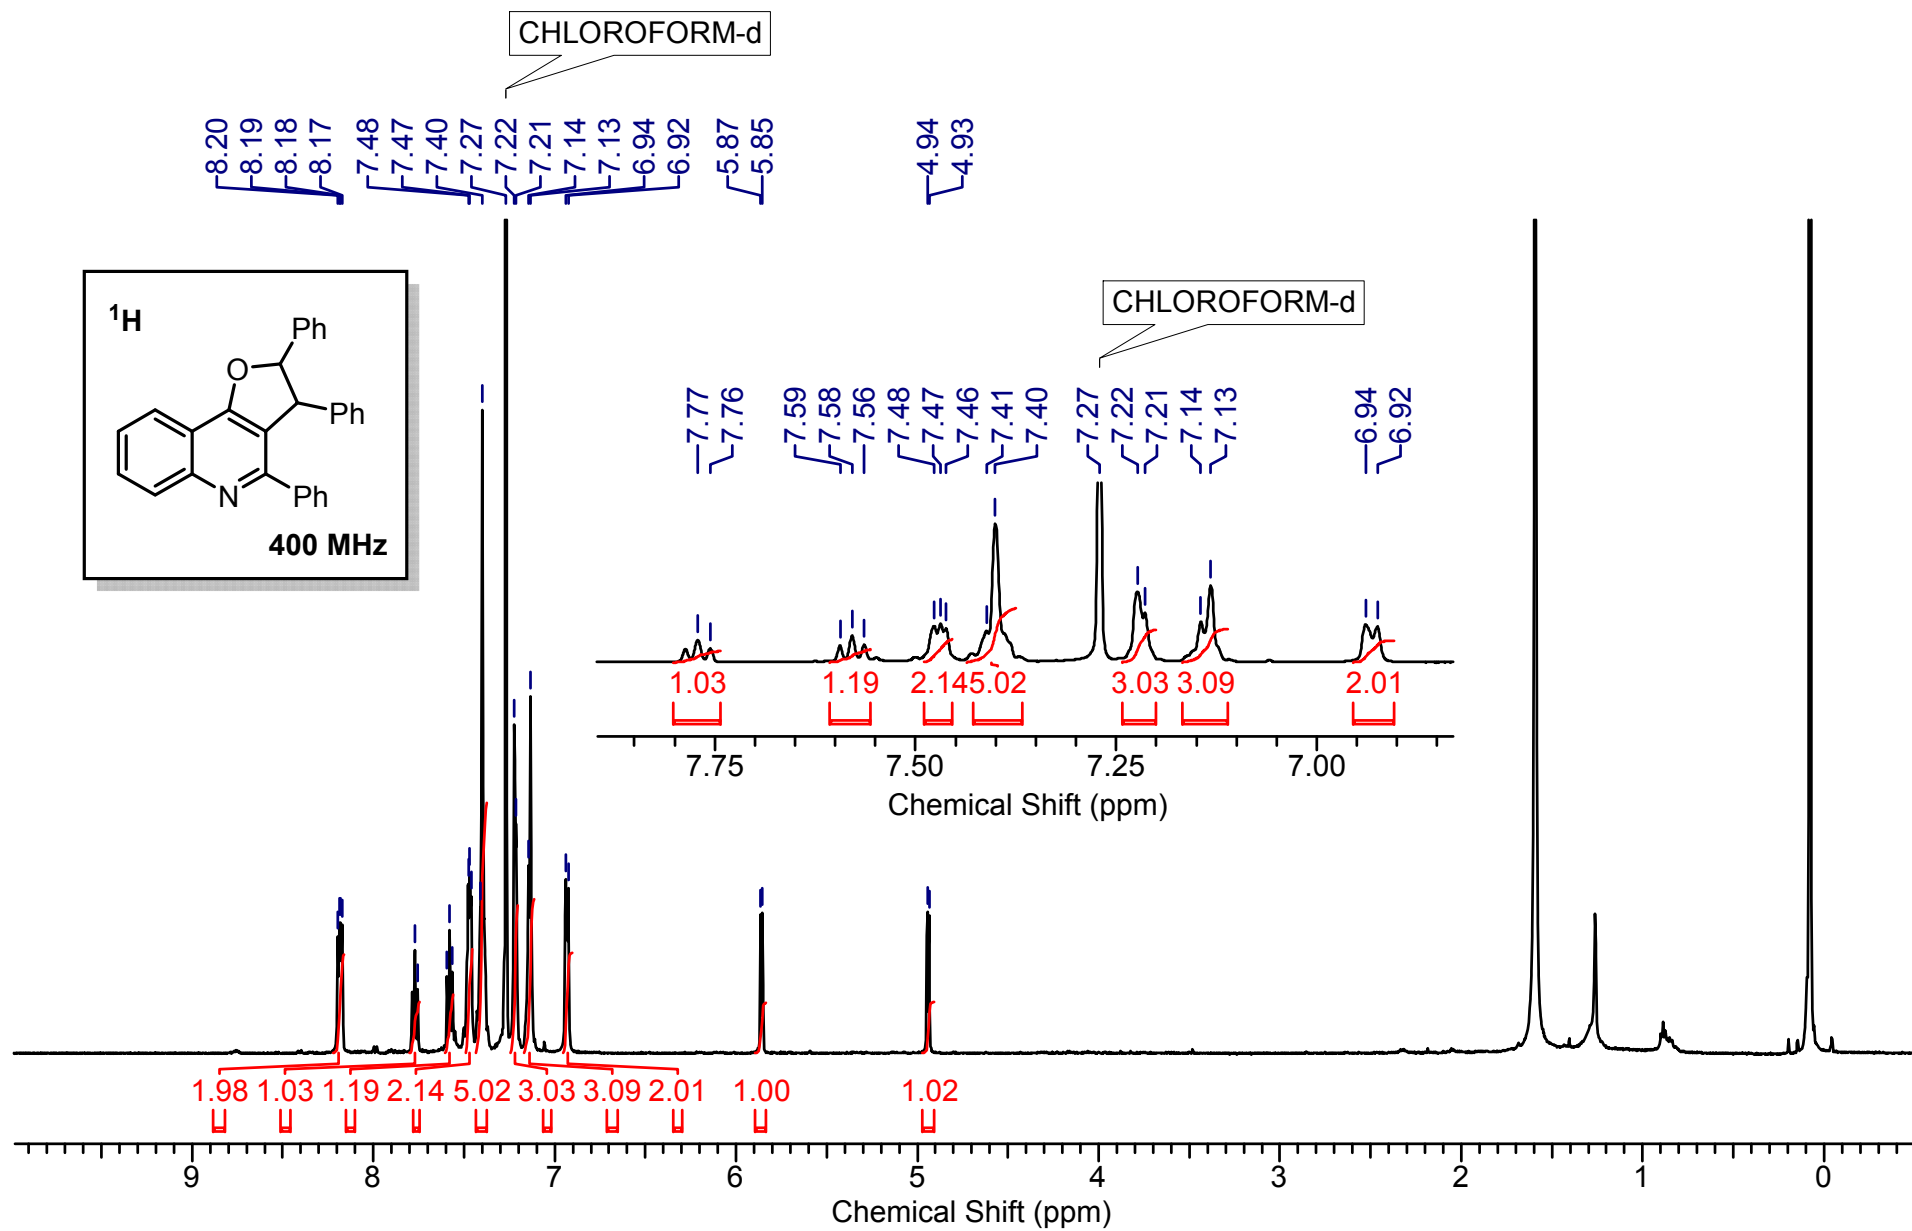

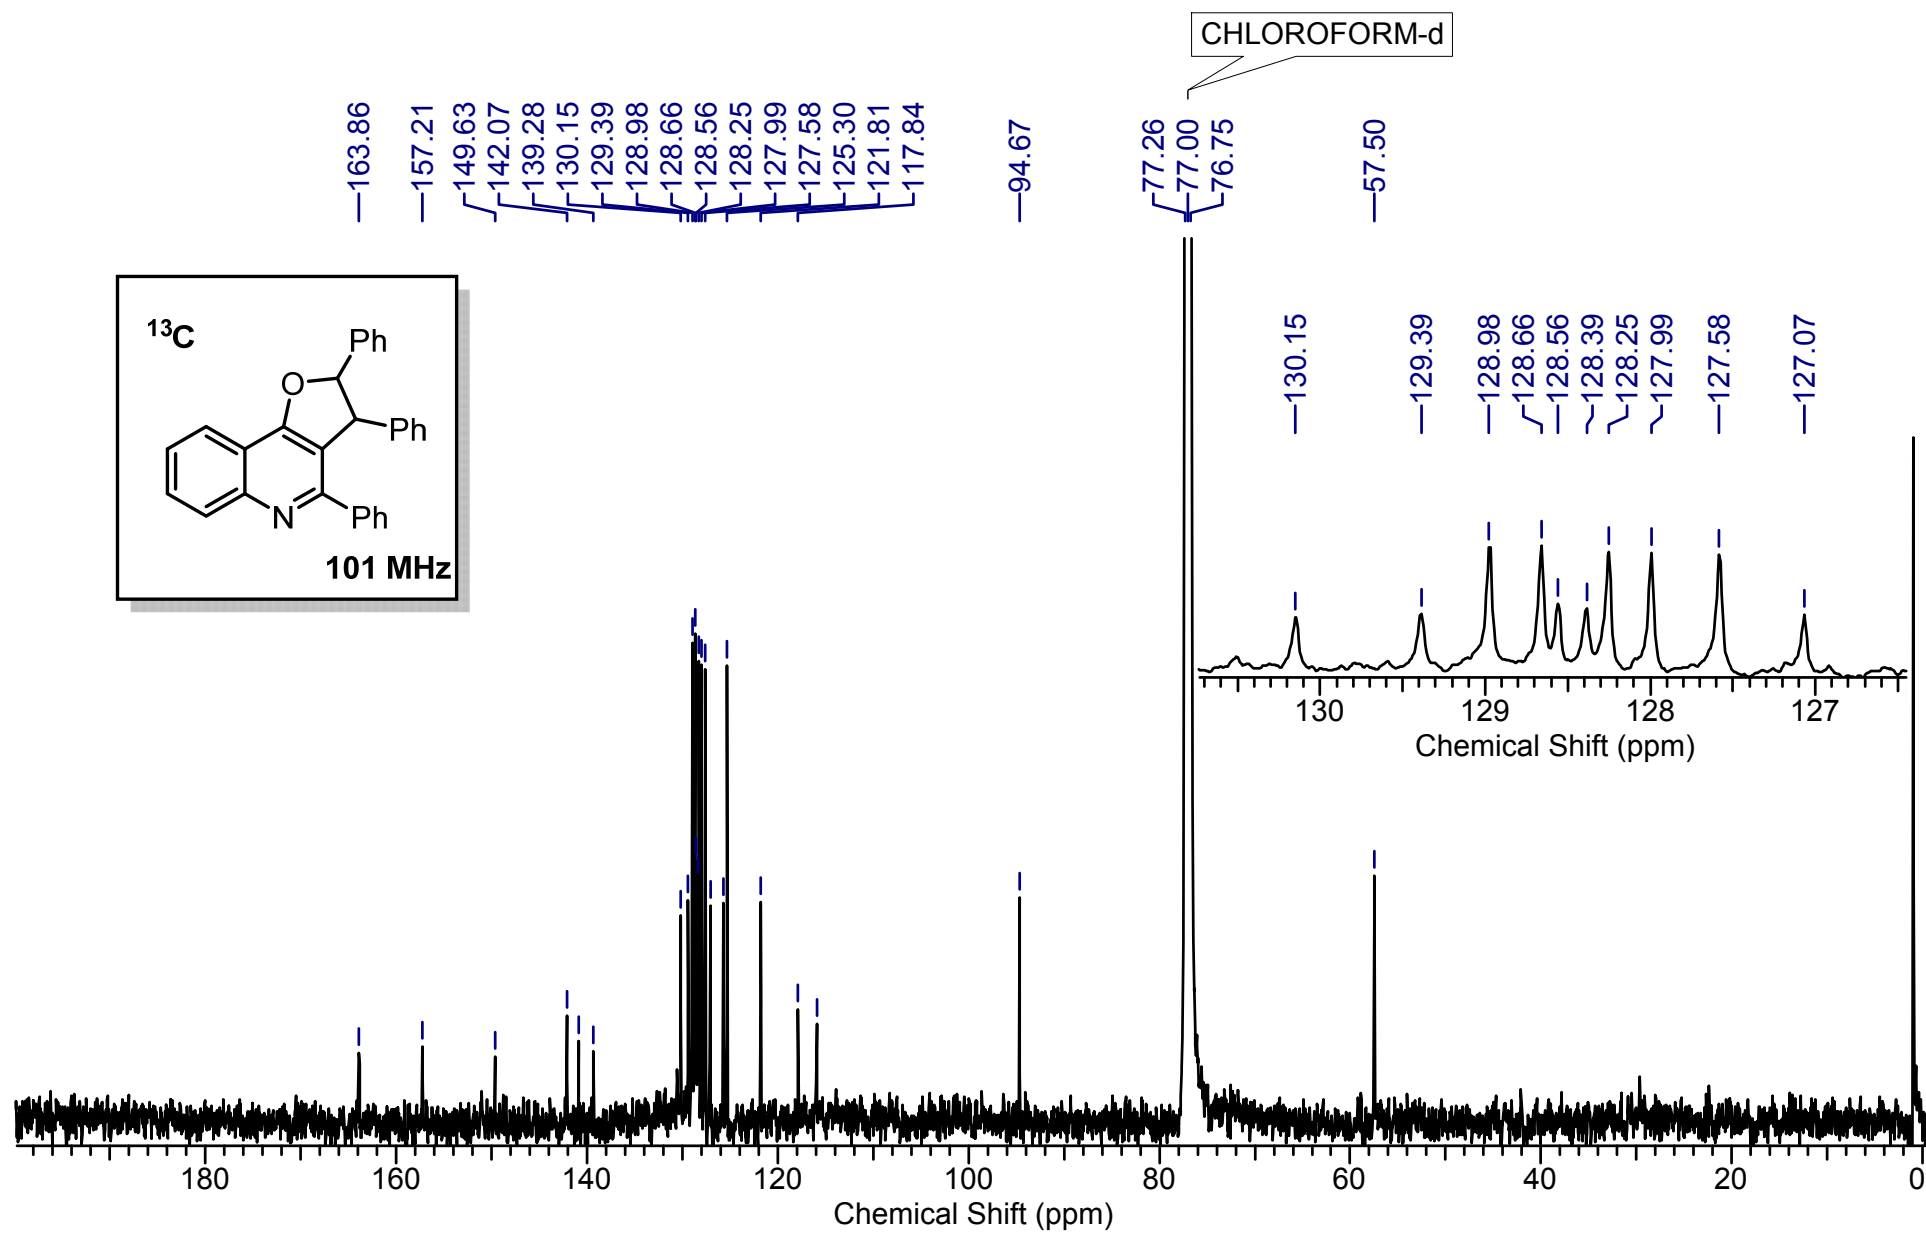



11

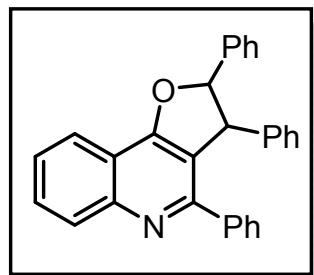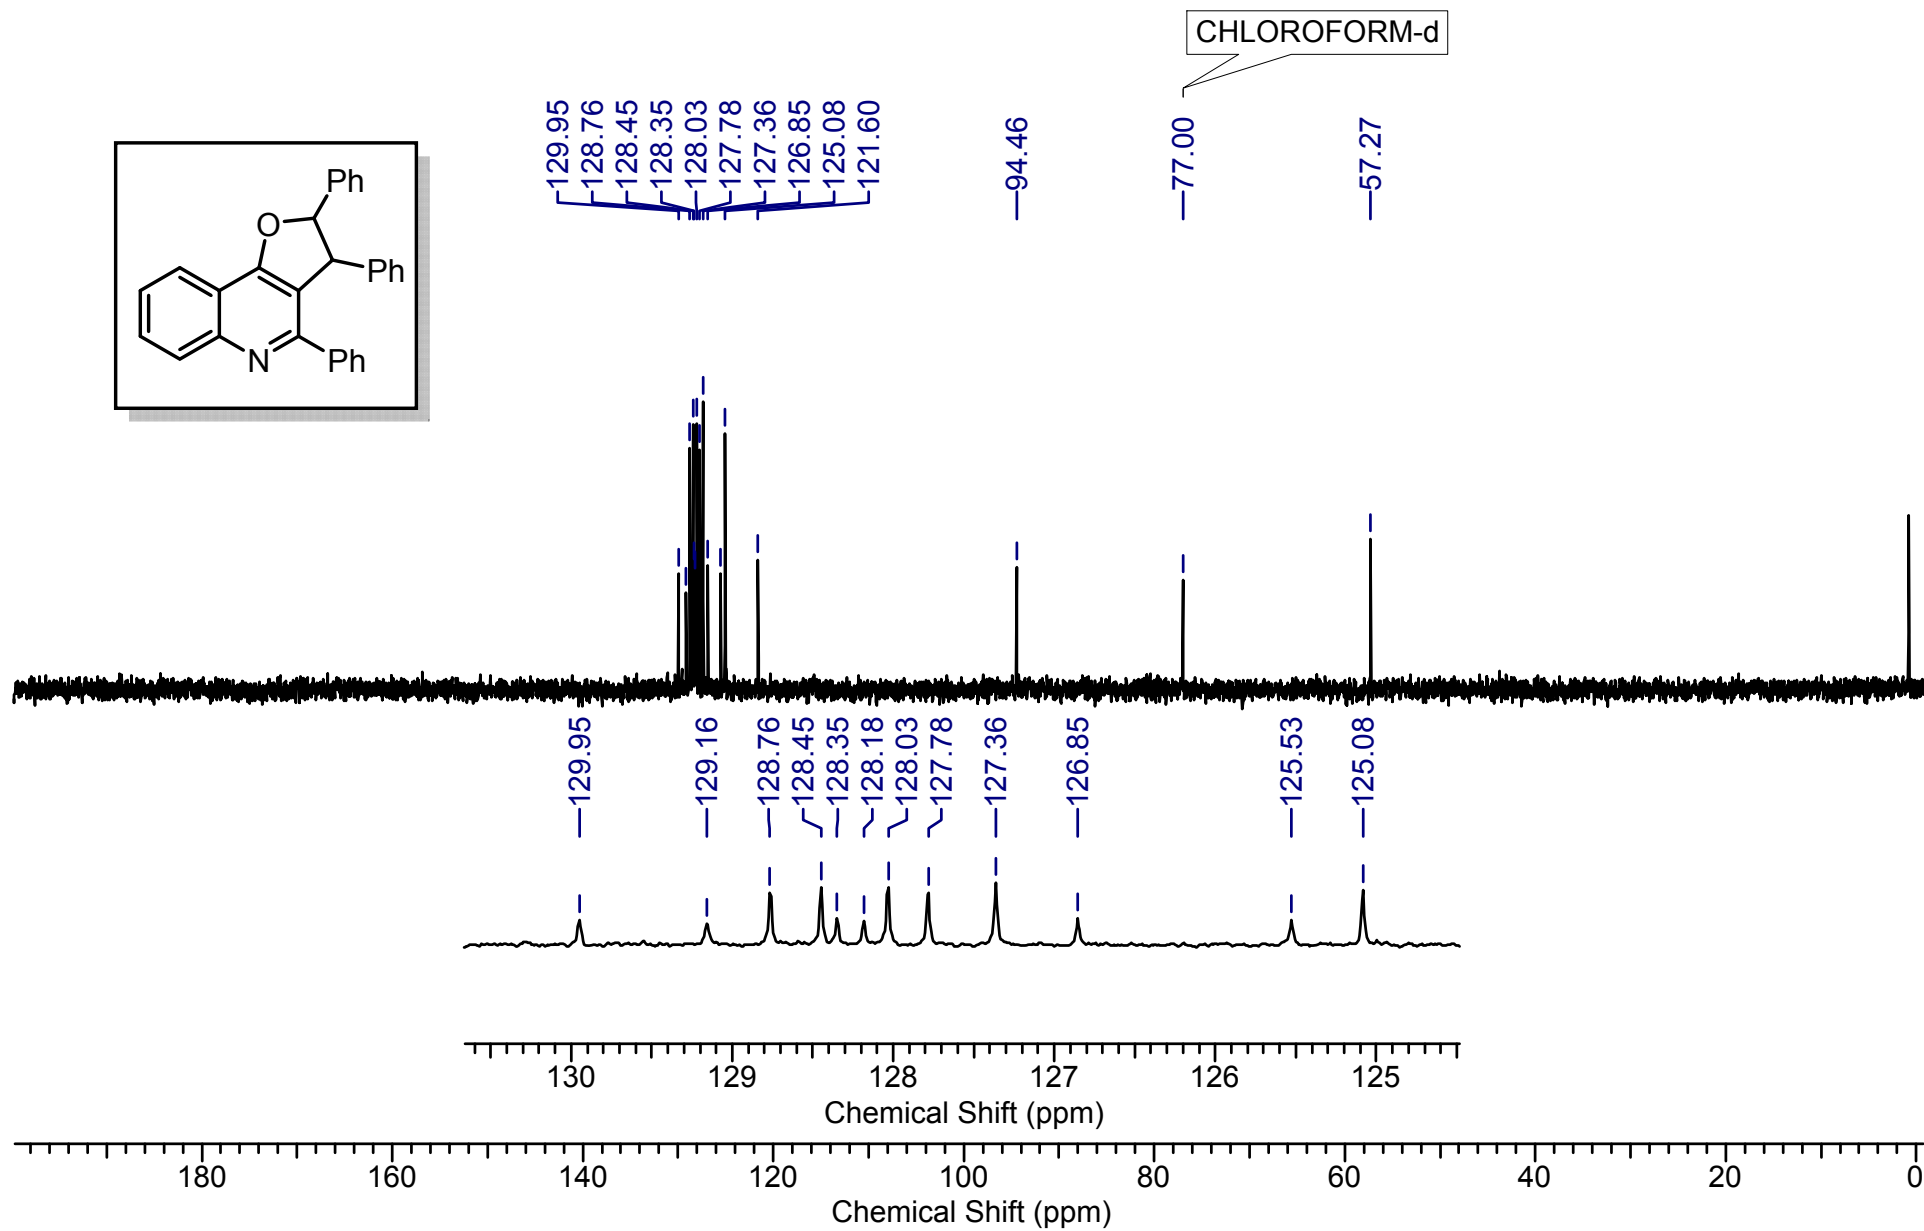

11

NK 2

NK 2 105 (1.926) AM2 (Ar,20000.0,556.28,0.00,LS 3); Sm (SG, 3x1.00)

IISER PUNE

1: TOF MS ES+  
1.04e4

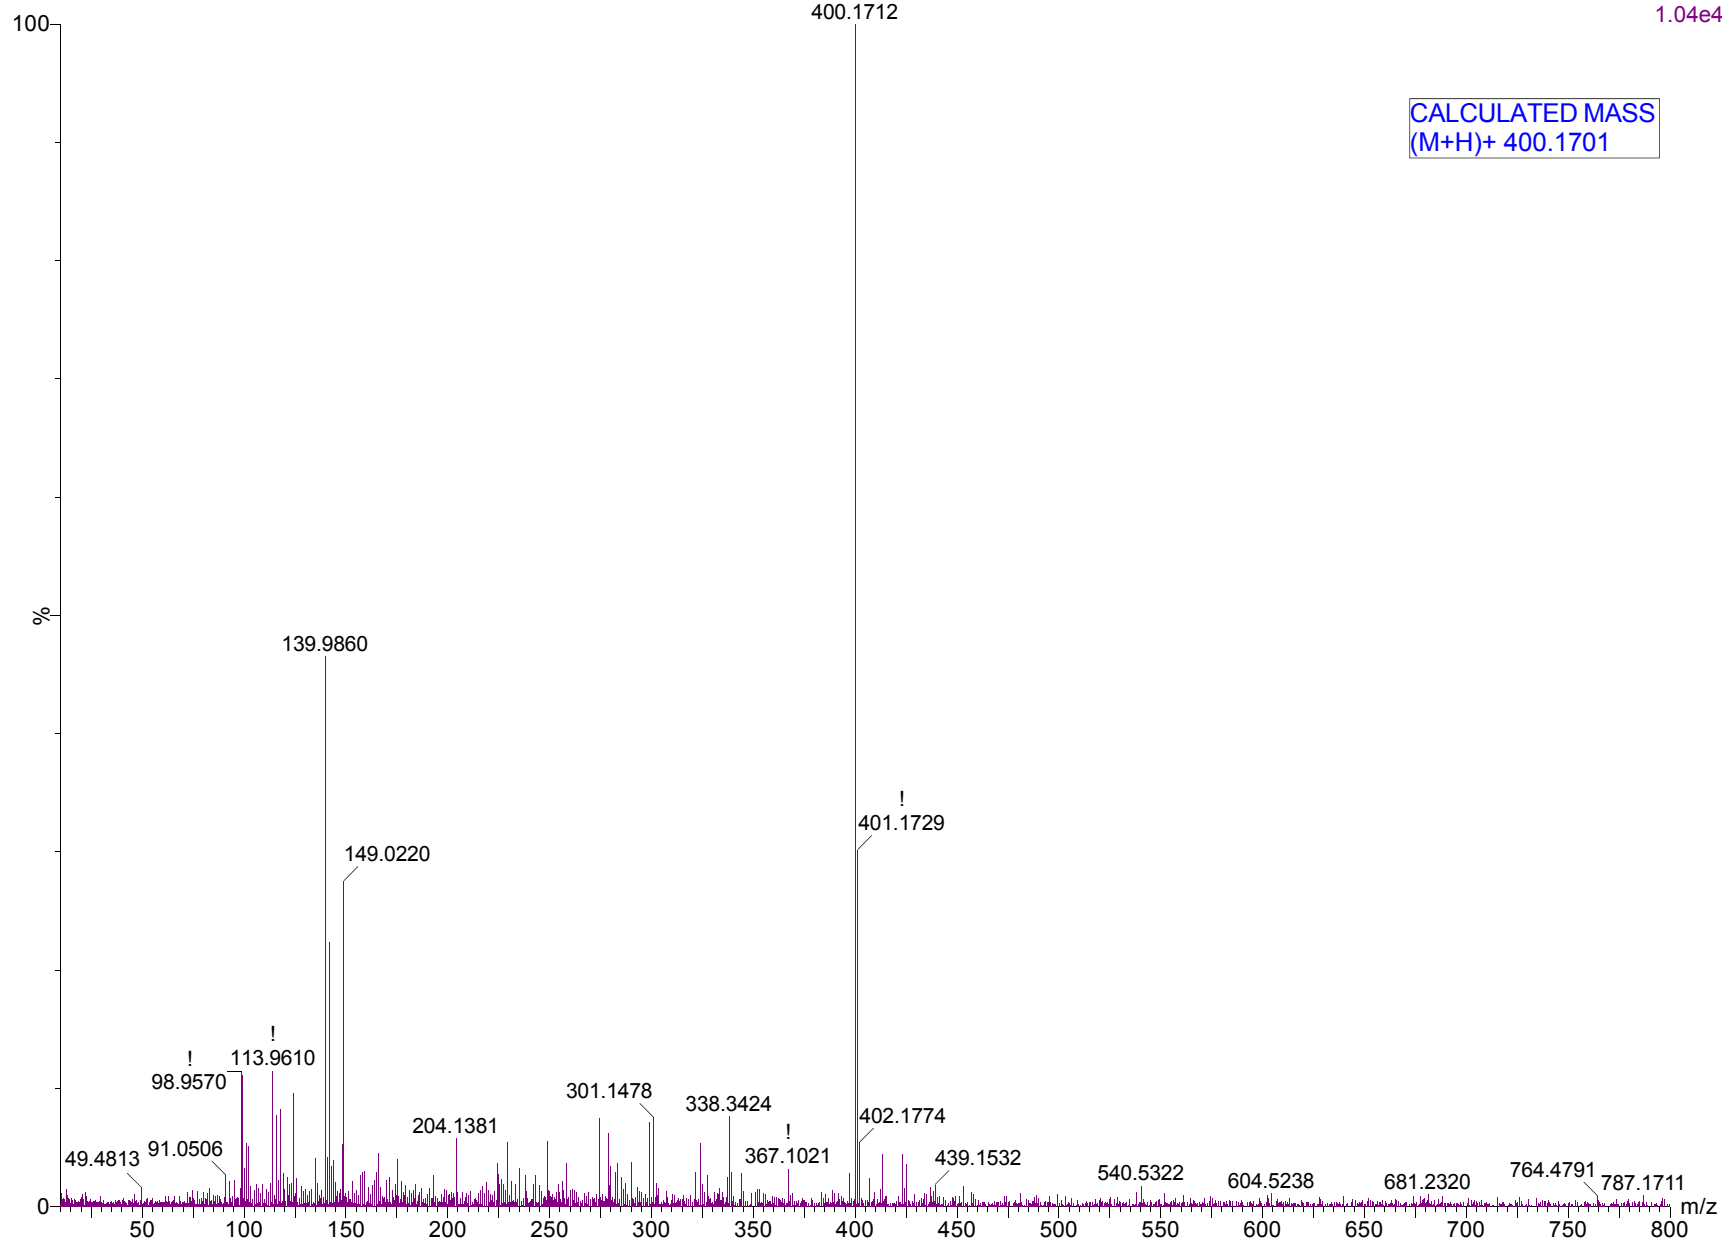

CALCULATED MASS  
(M+H)+ 400.1701
